# Supplementary material for: Sequence-based drug design using transformers
Source: bioRxiv preprint, doi:10.1101/2023.11.27.568880, version 1 (2023-11-27)
Supplement: Supplementary Dataset 3 [file 568880_file06.xlsx]

## Sheet: Sheet1
SMILES	lib	max_similarity_290
NC(=O)c1ccccc1O	L6000-Targetmol-Natural Compound Library-1680cpds	0.475728
OCCc1ccccc1	L6000-Targetmol-Natural Compound Library-1680cpds	0.512
C=C[C@H]1CN2CC[C@H]1C[C@@H]2[C@@H](O)c1ccnc2ccccc12	L6000-Targetmol-Natural Compound Library-1680cpds	0.412679
C/C=C/c1ccc(OC)cc1	L6000-Targetmol-Natural Compound Library-1680cpds	0.502222
C[N+](C)(C)CC(=O)O.Cl	L6000-Targetmol-Natural Compound Library-1680cpds	0.354331
CCC(=O)c1ccc(O)cc1	L6000-Targetmol-Natural Compound Library-1680cpds	0.412698
NCCS(=O)(=O)O	L6000-Targetmol-Natural Compound Library-1680cpds	0.328
O=C[C@H](O)[C@@H](O)[C@H](O)CO	L6000-Targetmol-Natural Compound Library-1680cpds	0.345833
CC(=O)OCC(=O)[C@@]1(O)CC[C@H]2[C@@H]3CCC4=CC(=O)CC[C@]4(C)[C@H]3C(=O)C[C@@]21C	L6000-Targetmol-Natural Compound Library-1680cpds	0.625592
CC1(C)C2CC[C@]3(C)C(C(=O)C=C4[C@@H]5C[C@@](C)(C(=O)O)CC[C@]5(C)CC[C@]43C)[C@@]2(C)CC[C@@H]1O	L6000-Targetmol-Natural Compound Library-1680cpds	0.653137
CN[C@H]1[C@@H](O[C@@H]2[C@@H](O[C@@H]3[C@@H](NC(=N)N)[C@H](O)[C@@H](NC(=N)N)[C@H](O)[C@H]3O)O[C@H](C)[C@@]2(O)C=O)O[C@H](CO)[C@@H](O)[C@@H]1O.CN[C@H]1[C@@H](O[C@@H]2[C@@H](O[C@H]3[C@@H](NC(=N)N)[C@H](O)[C@@H](NC(=N)N)[C@H](O)[C@H]3O)O[C@H](C)[C@@]2(O)C=O)O[C@H](CO)[C@@H](O)[C@@H]1O.O=S(=O)(O)O.O=S(=O)(O)O.O=S(=O)(O)O	L6000-Targetmol-Natural Compound Library-1680cpds	0.451912
Nc1nc(=O)c2nc(CNc3ccc(C(=O)N[C@@H](CCC(=O)O)C(=O)O)cc3)cnc2[nH]1	L6000-Targetmol-Natural Compound Library-1680cpds	0.466626
CC[C@H](C)[C@H](N)C(=O)O	L6000-Targetmol-Natural Compound Library-1680cpds	0.37037
Nc1ncnc2nc[nH]c12	L6000-Targetmol-Natural Compound Library-1680cpds	0.487129
CC(=O)Nc1ccc(O)cc1	L6000-Targetmol-Natural Compound Library-1680cpds	0.570093
O=c1cc[nH]c(=O)[nH]1	L6000-Targetmol-Natural Compound Library-1680cpds	0.367521
CC(=O)CCCCn1c(=O)c2c(ncn2C)n(C)c1=O	L6000-Targetmol-Natural Compound Library-1680cpds	0.46039
Br.COc1ccc2c3c1O[C@H]1C[C@@H](O)C=C[C@@]31CCN(C)C2	L6000-Targetmol-Natural Compound Library-1680cpds	0.579656
COc1c(O)cc2c(c1O)[C@@H]1O[C@H](CO)[C@@H](O)[C@H](O)[C@H]1OC2=O	L6000-Targetmol-Natural Compound Library-1680cpds	0.535035
C[n+]1cc2c3c(ccc2c2ccc4cc5c(cc4c21)OCO5)OCO3.[Cl-]	L6000-Targetmol-Natural Compound Library-1680cpds	0.521693
CNC(=O)Oc1ccc2c(c1)[C@]1(C)CCN(C)[C@@H]1N2C.O=C(O)c1ccccc1O	L6000-Targetmol-Natural Compound Library-1680cpds	0.538204
COc1ccc2cc1Oc1ccc(cc1)C[C@H]1c3c(cc4c(c3Oc3cc5c(cc3OC)CCN(C)[C@@H]5C2)OCO4)CCN1C	L6000-Targetmol-Natural Compound Library-1680cpds	0.474359
COc1cc([C@@H]2c3cc4c(cc3[C@@H](O[C@@H]3O[C@@H]5CO[C@@H](C)O[C@H]5[C@H](O)[C@H]3O)C3COC(=O)C32)OCO4)cc(OC)c1O	L6000-Targetmol-Natural Compound Library-1680cpds	0.599354
C[N+](C)(C)CCOP(=O)([O-])OP(=O)(O)OC[C@H]1O[C@@H](n2ccc(N)nc2=O)[C@H](O)[C@@H]1O	L6000-Targetmol-Natural Compound Library-1680cpds	0.469873
Cc1cccc(C)c1NC(=O)c1ccccc1C(=O)O	L6000-Targetmol-Natural Compound Library-1680cpds	0.487678
Nc1nc(=O)c2c([nH]1)NCC(CNc1ccc(C(=O)N[C@@H](CCC(=O)[O-])C(=O)[O-])cc1)N2C=O.[Ca+2]	L6000-Targetmol-Natural Compound Library-1680cpds	0.526695
CCOC(=O)C1=C[C@]2(CC)CCCN3CCc4c(n1c1ccccc41)[C@@H]32	L6000-Targetmol-Natural Compound Library-1680cpds	0.674239
CC(=O)O[C@@]12CO[C@@H]1C[C@H](O)[C@@]1(C)C(=O)[C@H](O)C3=C(C)[C@@H](OC(=O)[C@H](O)[C@@H](NC(=O)OC(C)(C)C)c4ccccc4)C[C@@](O)([C@@H](OC(=O)c4ccccc4)C12)C3(C)C.O.O.O	L6000-Targetmol-Natural Compound Library-1680cpds	0.59189
O=C(O)CCCCC1CCSS1	L6000-Targetmol-Natural Compound Library-1680cpds	0.475806
COc1ccc([C@@H]2CC(=O)c3c(O)cc(O[C@@H]4O[C@H](CO[C@@H]5O[C@@H](C)[C@H](O)[C@@H](O)[C@H]5O)[C@@H](O)[C@H](O)[C@H]4O)cc3O2)cc1OC	L6000-Targetmol-Natural Compound Library-1680cpds	0.631829
COc1cc(C(=S)N2CCOCC2)ccc1O	L6000-Targetmol-Natural Compound Library-1680cpds	0.424603
C[C@H]1O[C@H](O[C@@H]2[C@@H](CO)O[C@H](O[C@@H]3[C@@H](CO)OC(O)[C@H](O)[C@H]3O)[C@H](O)[C@H]2O)[C@H](O)[C@@H](O)[C@@H]1N[C@H]1C=C(CO)[C@@H](O)[C@H](O)[C@H]1O	L6000-Targetmol-Natural Compound Library-1680cpds	0.434368
C=C[C@H]1CN2CC[C@H]1C[C@@H]2[C@@H](O)c1ccnc2ccc(OC)cc12.Cl.O	L6000-Targetmol-Natural Compound Library-1680cpds	0.445563
CC(=O)OCC(=O)[C@@]1(O)CC[C@H]2[C@@H]3CCC4=CC(=O)C=C[C@]4(C)[C@@]3(Cl)[C@@H](Cl)C[C@@]21C	L6000-Targetmol-Natural Compound Library-1680cpds	0.556157
C/C=C(/C)C(=O)O[C@H]1[C@H](OC(C)=O)[C@@]2(CO)C(CC1(C)C)C1=CCC3[C@@]4(C)CC[C@H](O[C@@H]5O[C@H](C(=O)O)[C@@H](O[C@H]6O[C@@H](CO)[C@H](O)[C@@H](O)[C@@H]6O)[C@H](O)[C@H]5O[C@@H]5O[C@H](CO)[C@@H](O)[C@H](O)[C@H]5O)[C@](C)(CO)C4CC[C@@]3(C)[C@]1(C)C[C@@H]2O	L6000-Targetmol-Natural Compound Library-1680cpds	0.619737
C[C@H]1O[C@@H](O[C@H]2[C@@H](O)C[C@H](O[C@H]3[C@@H](O)C[C@H](O[C@H]4CC[C@]5(C)[C@H]6CC[C@]7(C)[C@@H](C8=CC(=O)OC8)CC[C@]7(O)[C@@H]6CC[C@@H]5C4)O[C@@H]3C)O[C@@H]2C)C[C@H](O)[C@@H]1O	L6000-Targetmol-Natural Compound Library-1680cpds	0.585014
C#C[C@]1(O)CC[C@H]2[C@@H]3CCC4=CC(=O)CC[C@]4(C)[C@H]3CC[C@@]21C	L6000-Targetmol-Natural Compound Library-1680cpds	0.563604
OCc1ccccc1O	L6000-Targetmol-Natural Compound Library-1680cpds	0.43318
COc1cc2c(c(OC)c1OC)-c1ccc(OC)c(=O)cc1C(NC(C)=O)CC2	L6000-Targetmol-Natural Compound Library-1680cpds	0.491198
NC(=O)CCC(N)C(=O)O	L6000-Targetmol-Natural Compound Library-1680cpds	0.408163
NC(=O)CC[C@H](N)C(=O)O	L6000-Targetmol-Natural Compound Library-1680cpds	0.408163
OCCSCCO	L6000-Targetmol-Natural Compound Library-1680cpds	0.328125
CN(C)CCOC(c1ccccc1)c1ccccc1.Cl	L6000-Targetmol-Natural Compound Library-1680cpds	0.412632
OC[C@H](O)[C@@H](O)[C@H](O)[C@H](O)CO	L6000-Targetmol-Natural Compound Library-1680cpds	0.488
CC(C)CC(N)=O	L6000-Targetmol-Natural Compound Library-1680cpds	0.5
CN1[C@H]2CC[C@@H]1C[C@H](OC(=O)C(CO)c1ccccc1)C2	L6000-Targetmol-Natural Compound Library-1680cpds	0.472665
CN1[C@H]2CC[C@@H]1C[C@H](OC(=O)C(CO)c1ccccc1)C2.CN1[C@H]2CC[C@@H]1C[C@H](OC(=O)C(CO)c1ccccc1)C2.O.O=S(=O)(O)O	L6000-Targetmol-Natural Compound Library-1680cpds	0.47836
CN1[C@H]2CC[C@@H]1C[C@H](OC(=O)C(CO)c1ccccc1)C2.CN1[C@H]2CC[C@@H]1C[C@H](OC(=O)C(CO)c1ccccc1)C2.O=S(=O)(O)O	L6000-Targetmol-Natural Compound Library-1680cpds	0.47836
C[C@@H]1CC[C@H]2[C@@H](C)C(=O)O[C@@H]3O[C@@]4(C)CC[C@@H]1[C@]32OO4	L6000-Targetmol-Natural Compound Library-1680cpds	0.490706
COC(=O)c1ccccc1O	L6000-Targetmol-Natural Compound Library-1680cpds	0.427602
C[C@H](CCC(=O)O)C1CC[C@H]2[C@@H]3C(=O)C[C@@H]4CC(=O)CC[C@]4(C)[C@H]3CC(=O)[C@]12C	L6000-Targetmol-Natural Compound Library-1680cpds	0.440104
OC[C@@H](O)[C@@H](O)[C@H](O)[C@H](O)CO	L6000-Targetmol-Natural Compound Library-1680cpds	0.488
O=C([O-])[C@H](O)[C@@H](O)[C@H](O)[C@H](O)CO.[Na+]	L6000-Targetmol-Natural Compound Library-1680cpds	0.315245
O[C@H]1[C@H](O)[C@@H](O)[C@H](O)[C@@H](O)[C@H]1O	L6000-Targetmol-Natural Compound Library-1680cpds	0.329004
N[C@@H](C=O)[C@@H](O)[C@H](O)[C@H](O)CO	L6000-Targetmol-Natural Compound Library-1680cpds	0.346154
C[C@@H]1CC[C@H]2[C@@H](C)[C@H](OC(=O)CCC(=O)O)O[C@@H]3O[C@@]4(C)CC[C@@H]1[C@@]23OO4	L6000-Targetmol-Natural Compound Library-1680cpds	0.472888
O=C[C@H](O)[C@H]1OC(=O)[C@@H](O)[C@H]1O	L6000-Targetmol-Natural Compound Library-1680cpds	0.380417
O=c1[nH]cnc2c1ncn2[C@@H]1O[C@H](CO)[C@@H](O)[C@H]1O	L6000-Targetmol-Natural Compound Library-1680cpds	0.5
N[C@@H](Cc1c[nH]c2ccccc12)C(=O)O	L6000-Targetmol-Natural Compound Library-1680cpds	0.459239
OCc1ccccc1O[C@@H]1O[C@H](CO)[C@@H](O)[C@H](O)[C@H]1O	L6000-Targetmol-Natural Compound Library-1680cpds	0.38896
CC1=CC(=O)c2ccccc2C1=O	L6000-Targetmol-Natural Compound Library-1680cpds	0.400693
CNC[C@H](O)c1cccc(O)c1.Cl	L6000-Targetmol-Natural Compound Library-1680cpds	0.510903
COc1ccc2cc3[n+](cc2c1OC)CCc1cc2c(cc1-3)OCO2.[Cl-]	L6000-Targetmol-Natural Compound Library-1680cpds	0.515271
O=c1oc2c(O)c(O)cc3c(=O)oc4c(O)c(O)cc1c4c23	L6000-Targetmol-Natural Compound Library-1680cpds	0.491264
Cl.NCC(O)c1ccc(O)cc1	L6000-Targetmol-Natural Compound Library-1680cpds	0.454839
OC[C@H]1O[C@@H](Oc2ccc(O)cc2)[C@H](O)[C@@H](O)[C@@H]1O	L6000-Targetmol-Natural Compound Library-1680cpds	0.469574
CC(=O)[C@H]1CC[C@H]2[C@@H]3CCC4=CC(=O)CC[C@]4(C)[C@H]3CC[C@]12C	L6000-Targetmol-Natural Compound Library-1680cpds	0.47037
O=c1cccc2n1C[C@@H]1CNC[C@H]2C1	L6000-Targetmol-Natural Compound Library-1680cpds	0.408602
Cn1c(=O)c2c(ncn2CC2OCCO2)n(C)c1=O	L6000-Targetmol-Natural Compound Library-1680cpds	0.441943
CCc1c2c(nc3ccc(OC(=O)N4CCC(N5CCCCC5)CC4)cc13)-c1cc3c(c(=O)n1C2)COC(=O)[C@]3(O)CC.Cl.O.O.O	L6000-Targetmol-Natural Compound Library-1680cpds	0.683917
N[C@@H](Cc1ccc(O)cc1)C(=O)O	L6000-Targetmol-Natural Compound Library-1680cpds	0.446429
CN1CC(=O)N=C1N	L6000-Targetmol-Natural Compound Library-1680cpds	0.492063
O=C1CC[C@@H](C(=O)O)N1	L6000-Targetmol-Natural Compound Library-1680cpds	0.383367
NCCCC(=O)O	L6000-Targetmol-Natural Compound Library-1680cpds	0.484375
C=C1c2cccc(O)c2C(O)=C2C(=O)[C@]3(O)C(=O)C(C(N)=O)=C(O)[C@@H](N(C)C)C3[C@@H](O)[C@H]12.Cl	L6000-Targetmol-Natural Compound Library-1680cpds	0.666146
CC1(C)[C@@H](O[C@H]2O[C@H](C(=O)O)[C@@H](O)[C@H](O)[C@H]2O[C@@H]2O[C@H](C(=O)O)[C@@H](O)[C@H](O)[C@H]2O)CC[C@@]2(C)[C@H]1CC[C@]1(C)[C@@H]2C(=O)C=C2[C@H]3C[C@@](C)(C(=O)O)CC[C@]3(C)CC[C@]21C.N.N	L6000-Targetmol-Natural Compound Library-1680cpds	0.604054
OC[C@H](O)[C@@H](O)[C@@H](O)[C@H](O)CO	L6000-Targetmol-Natural Compound Library-1680cpds	0.488
O=C1CC(c2ccccc2)Oc2ccccc21	L6000-Targetmol-Natural Compound Library-1680cpds	0.782555
CC1CNC(=O)NC1=O	L6000-Targetmol-Natural Compound Library-1680cpds	0.506024
O=C(O)CCc1ccc(O)c(O)c1	L6000-Targetmol-Natural Compound Library-1680cpds	0.496914
Cn1cnc2[nH]c(=O)[nH]c(=O)c21	L6000-Targetmol-Natural Compound Library-1680cpds	0.449891
Cl.NCCC[C@@H](N)C(=O)O	L6000-Targetmol-Natural Compound Library-1680cpds	0.314286
COc1cc(CCC(=O)O)ccc1O	L6000-Targetmol-Natural Compound Library-1680cpds	0.539823
O=C(O)c1ccc(O)c(O)c1	L6000-Targetmol-Natural Compound Library-1680cpds	0.514107
COc1ccc(CC(=O)O)cc1OC	L6000-Targetmol-Natural Compound Library-1680cpds	0.573134
O=C(O)c1cc(O)cc(O)c1	L6000-Targetmol-Natural Compound Library-1680cpds	0.463259
COC(=O)c1cc(OC)c(OC)c(OC)c1	L6000-Targetmol-Natural Compound Library-1680cpds	0.417178
O=c1c(O)c(-c2cc(O)c(O)c(O)c2)oc2cc(O)cc(O)c12	L6000-Targetmol-Natural Compound Library-1680cpds	0.40281
OC[C@H](O)[C@H](O)CO	L6000-Targetmol-Natural Compound Library-1680cpds	0.4375
OC[C@H]1O[C@H](O[C@@H]2[C@@H](CO)OC(O)[C@H](O)[C@H]2O)[C@H](O)[C@@H](O)[C@@H]1O	L6000-Targetmol-Natural Compound Library-1680cpds	0.331928
O.OC[C@H]1O[C@H](O[C@@H]2[C@@H](CO)O[C@H](O)[C@H](O)[C@H]2O)[C@H](O)[C@@H](O)[C@@H]1O	L6000-Targetmol-Natural Compound Library-1680cpds	0.331928
OC[C@H](O)[C@@H](O)[C@H](O[C@H]1O[C@H](CO)[C@@H](O)[C@H](O)[C@H]1O)[C@H](O)CO	L6000-Targetmol-Natural Compound Library-1680cpds	0.328173
OC1OC[C@H](O)[C@H](O)[C@H]1O	L6000-Targetmol-Natural Compound Library-1680cpds	0.381818
OC[C@H](O)[C@@H](O)[C@H](O)CO	L6000-Targetmol-Natural Compound Library-1680cpds	0.403226
O=C1OC([C@H](O)CO)C([O-])=C1O.[Na+]	L6000-Targetmol-Natural Compound Library-1680cpds	0.405076
OC[C@H]1OC(O)[C@H](O)[C@@H](O)[C@H]1O	L6000-Targetmol-Natural Compound Library-1680cpds	0.481043
OC[C@H]1OC(O)[C@@H](O)[C@@H](O)[C@@H]1O	L6000-Targetmol-Natural Compound Library-1680cpds	0.481043
C[C@@H]1O[C@@H](O[C@H]2[C@H](Oc3cc(O)c4c(c3)O[C@H](c3ccc(O)cc3)CC4=O)O[C@H](CO)[C@@H](O)[C@@H]2O)[C@H](O)[C@H](O)[C@H]1O	L6000-Targetmol-Natural Compound Library-1680cpds	0.605447
C[C@@H]1CC[C@H]2[C@@H](C)[C@@H](O)O[C@@H]3O[C@@]4(C)CC[C@@H]1[C@@]23OO4	L6000-Targetmol-Natural Compound Library-1680cpds	0.444444
Oc1cc(O)cc(/C=C/c2ccc(O)c(O)c2)c1	L6000-Targetmol-Natural Compound Library-1680cpds	0.467492
COc1cc(C(O)C(=O)O)ccc1O	L6000-Targetmol-Natural Compound Library-1680cpds	0.445148
NC(=O)c1ccc[n+]([O-])c1	L6000-Targetmol-Natural Compound Library-1680cpds	0.440171
Cn1cnc2c1c(=O)[nH]c(=O)n2C	L6000-Targetmol-Natural Compound Library-1680cpds	0.374625
O=c1[nH]c(=O)c2[nH]c(=O)[nH]c2[nH]1	L6000-Targetmol-Natural Compound Library-1680cpds	0.36939
NCCC(=O)O	L6000-Targetmol-Natural Compound Library-1680cpds	0.421875
COc1cc(C(=O)O)cc(OC)c1OC	L6000-Targetmol-Natural Compound Library-1680cpds	0.421505
NCCc1c[nH]c2ccccc12	L6000-Targetmol-Natural Compound Library-1680cpds	0.415317
O=C(O)c1ccccc1O	L6000-Targetmol-Natural Compound Library-1680cpds	0.382263
CC(=O)Oc1ccccc1	L6000-Targetmol-Natural Compound Library-1680cpds	0.410788
O=c1[nH]c(=O)c2[nH]cnc2[nH]1	L6000-Targetmol-Natural Compound Library-1680cpds	0.348735
Cl.N=C(N)NCCC[C@H](N)C(=O)O	L6000-Targetmol-Natural Compound Library-1680cpds	0.448413
CO[C@H]1C=CO[C@@]2(C)Oc3c(C)c(O)c4c(O)c(c(/C=N/N5CCN(C)CC5)c(O)c4c3C2=O)NC(=O)/C(C)=C\C=C/[C@H](C)[C@H](O)[C@@H](C)[C@@H](O)[C@@H](C)[C@H](OC(C)=O)[C@@H]1C	L6000-Targetmol-Natural Compound Library-1680cpds	0.65578
CC[C@H](C)C(=O)O[C@H]1CCC=C2C=C[C@H](C)[C@H](CC[C@@H]3C[C@@H](O)CC(=O)O3)[C@H]21	L6000-Targetmol-Natural Compound Library-1680cpds	0.603101
CC(=O)OC/C=C(C)/C=C/C=C(C)/C=C/C1=C(C)CCCC1(C)C	L6000-Targetmol-Natural Compound Library-1680cpds	0.509852
CCC(C)(C)C(=O)O[C@H]1C[C@@H](C)C=C2C=C[C@H](C)[C@H](CC[C@@H]3C[C@@H](O)CC(=O)O3)[C@H]21	L6000-Targetmol-Natural Compound Library-1680cpds	0.60815
N[C@H](Cc1ccccc1)C(=O)O	L6000-Targetmol-Natural Compound Library-1680cpds	0.361194
C=C[C@H]1CN2CC[C@H]1C[C@H]2[C@H](O)c1ccnc2ccc(OC)cc12	L6000-Targetmol-Natural Compound Library-1680cpds	0.445563
C[C@H](CCC(=O)O)C1CC[C@H]2C3[C@@H](O)C[C@@H]4C[C@H](O)CC[C@]4(C)[C@H]3CC[C@]12C	L6000-Targetmol-Natural Compound Library-1680cpds	0.451524
C[C@@H]1C/C=C/C=C/C=C/C=C/[C@H](O[C@@H]2O[C@H](C)[C@@H](O)[C@H](N)[C@@H]2O)C[C@@H]2O[C@](O)(C[C@@H](O)C[C@H]3O[C@@H]3/C=C/C(=O)O1)C[C@H](O)[C@H]2C(=O)O	L6000-Targetmol-Natural Compound Library-1680cpds	0.503137
N[C@H]1CONC1=O	L6000-Targetmol-Natural Compound Library-1680cpds	0.392857
C[C@@H]1[C@H]2C3=CC[C@@H]4[C@@]5(C)CC[C@H](O)C(C)(C)[C@@H]5CC[C@@]4(C)[C@]3(C)CC[C@@]2(C(=O)O)CC[C@H]1C	L6000-Targetmol-Natural Compound Library-1680cpds	0.798337
COc1ccc(-c2coc3cc(O)ccc3c2=O)cc1	L6000-Targetmol-Natural Compound Library-1680cpds	0.35958
O=C(/C=C/c1ccc(O)cc1)c1ccc(O)cc1O	L6000-Targetmol-Natural Compound Library-1680cpds	0.595113
O=C(OCc1ccccc1)c1ccccc1	L6000-Targetmol-Natural Compound Library-1680cpds	0.353222
OCc1ccccc1	L6000-Targetmol-Natural Compound Library-1680cpds	0.421488
NCCC[C@H](N)C(=O)O	L6000-Targetmol-Natural Compound Library-1680cpds	0.314286
NC(N)=O	L6000-Targetmol-Natural Compound Library-1680cpds	0.125
C[N+](C)(C)CC(O)CC(=O)[O-]	L6000-Targetmol-Natural Compound Library-1680cpds	0.388889
O=C(O)c1cc(=O)[nH]c(=O)[nH]1	L6000-Targetmol-Natural Compound Library-1680cpds	0.342826
Oc1ccc(OCc2ccccc2)cc1	L6000-Targetmol-Natural Compound Library-1680cpds	0.527027
CC(C)CCC[C@@H](C)C1CC[C@H]2[C@@H]3CC=C4C[C@@H](O)CC[C@]4(C)[C@H]3CC[C@]12C	L6000-Targetmol-Natural Compound Library-1680cpds	0.660326
O=C1c2c(O)cccc2C(OC2OC(CO)C(O)C(O)C2O)c2cc(CO)cc(O)c21	L6000-Targetmol-Natural Compound Library-1680cpds	0.474708
C[C@@H]1O[C@@H](OC[C@H]2O[C@@H](Oc3c(-c4ccc(OCCO)c(OCCO)c4)oc4cc(OCCO)cc(O)c4c3=O)[C@H](O)[C@@H](O)[C@@H]2O)[C@H](O)[C@H](O)[C@H]1O	L6000-Targetmol-Natural Compound Library-1680cpds	0.5626
O=c1ccc2ccccc2o1	L6000-Targetmol-Natural Compound Library-1680cpds	0.406114
CN[C@H]1[C@@H](O)[C@@H](NC)[C@H](O)[C@H]2O[C@@H]3O[C@H](C)CC(=O)[C@]3(O)O[C@H]12.Cl.Cl	L6000-Targetmol-Natural Compound Library-1680cpds	0.421931
COC(=O)[C@H]1[C@H]2C[C@@H]3c4[nH]c5cc(OC)ccc5c4CCN3C[C@H]2C[C@@H](OC(=O)c2cc(OC)c(OC)c(OC)c2)[C@@H]1OC	L6000-Targetmol-Natural Compound Library-1680cpds	0.624934
C1CCN2C[C@H]3C[C@H](CN4CCCC[C@H]34)[C@@H]2C1.O.O.O.O.O.O=S(=O)(O)O	L6000-Targetmol-Natural Compound Library-1680cpds	0.45
NC[C@H]1O[C@H](O[C@@H]2[C@@H](N)C[C@@H](N)[C@H](O[C@H]3O[C@H](CO)[C@@H](O)[C@H](N)[C@H]3O)[C@H]2O)[C@H](O)[C@@H](O)[C@@H]1O.O=S(=O)(O)O	L6000-Targetmol-Natural Compound Library-1680cpds	0.497972
C[C@@H]1O[C@@H](OC[C@H]2O[C@@H](Oc3c(-c4ccc(O)c(O)c4)oc4cc(O)cc(O)c4c3=O)[C@H](O)[C@@H](O)[C@@H]2O)[C@H](O)[C@H](O)[C@H]1O	L6000-Targetmol-Natural Compound Library-1680cpds	0.547109
OC[C@H]1O[C@](O)(CO)[C@@H](O)[C@@H]1O[C@@H]1O[C@H](CO)[C@H](O)[C@H](O)[C@H]1O	L6000-Targetmol-Natural Compound Library-1680cpds	0.394523
O=C1c2cccc(O)c2C(=O)c2c(O)cccc21	L6000-Targetmol-Natural Compound Library-1680cpds	0.428931
O=C(OC[C@H]1O[C@@H](OC(=O)c2cc(O)c(O)c(OC(=O)c3cc(O)c(O)c(O)c3)c2)[C@H](OC(=O)c2cc(O)c(O)c(OC(=O)c3cc(O)c(O)c(O)c3)c2)[C@@H](OC(=O)c2cc(O)c(O)c(OC(=O)c3cc(O)c(O)c(O)c3)c2)[C@@H]1OC(=O)c1cc(O)c(O)c(OC(=O)c2cc(O)c(O)c(O)c2)c1)c1cc(O)c(O)c(OC(=O)c2cc(O)c(O)c(O)c2)c1	L6000-Targetmol-Natural Compound Library-1680cpds	0.449014
CC[C@@H]1C(=O)OC[C@@H]1Cc1cncn1C.Cl	L6000-Targetmol-Natural Compound Library-1680cpds	0.460905
O=c1oc2ccccc2c(O)c1Cc1c(O)c2ccccc2oc1=O	L6000-Targetmol-Natural Compound Library-1680cpds	0.356071
CC1(C)SC2C(NC(=O)C(N)c3ccccc3)C(=O)N2C1C(=O)O.O.O.O	L6000-Targetmol-Natural Compound Library-1680cpds	0.504704
CC1(C)S[C@@H]2[C@H](NC(=O)[C@H](N)c3ccccc3)C(=O)N2[C@H]1C(=O)O	L6000-Targetmol-Natural Compound Library-1680cpds	0.504704
COC1C(O)CC(=O)OC(C)C/C=C/C=C/C(OC2CCC(N(C)C)C(C)O2)C(C)CC(CC=O)C1OC1OC(C)C(OC2CC(C)(O)C(O)C(C)O2)C(N(C)C)C1O	L6000-Targetmol-Natural Compound Library-1680cpds	0.489209
Oc1cc(O)c2c(c1)O[C@H](c1ccc(O)c(O)c1)[C@@H](O)C2	L6000-Targetmol-Natural Compound Library-1680cpds	0.581285
O=C(O)c1ccccc1	L6000-Targetmol-Natural Compound Library-1680cpds	0.37788
CCOC(=O)c1ccc(O)cc1	L6000-Targetmol-Natural Compound Library-1680cpds	0.412844
C[N+](C)(C)C[C@H](O)CC(=O)[O-]	L6000-Targetmol-Natural Compound Library-1680cpds	0.388889
C[C@H](CCC(=O)O)C1CC[C@H]2C3[C@H](CC[C@]12C)[C@@]1(C)CC[C@@H](O)CC1C[C@H]3O	L6000-Targetmol-Natural Compound Library-1680cpds	0.451524
N[C@@H](Cc1ccc(O)c(O)c1)C(=O)O	L6000-Targetmol-Natural Compound Library-1680cpds	0.560117
CC(=O)[C@H]1CC[C@H]2[C@@H]3CC=C4C[C@@H](O)CC[C@]4(C)[C@H]3CC[C@]12C	L6000-Targetmol-Natural Compound Library-1680cpds	0.556604
Nc1ncnc2c1ncn2[C@@H]1O[C@H](CO)[C@@H](O)[C@H]1O	L6000-Targetmol-Natural Compound Library-1680cpds	0.511186
C[C@]12CC[C@H]3[C@@H](CC=C4C[C@@H](O)CC[C@@]43C)[C@@H]1CCC2=O	L6000-Targetmol-Natural Compound Library-1680cpds	0.569288
N[C@@H](Cc1cc(I)c(Oc2cc(I)c(O)c(I)c2)c(I)c1)C(=O)O	L6000-Targetmol-Natural Compound Library-1680cpds	0.452949
CC(=O)N[C@@H](CS)C(=O)O	L6000-Targetmol-Natural Compound Library-1680cpds	0.478261
O=C(O)c1cc(O)c(O)c(O)c1	L6000-Targetmol-Natural Compound Library-1680cpds	0.551724
COc1ccc(-c2cc(=O)c3c(O)cc(O[C@@H]4O[C@H](CO[C@@H]5O[C@@H](C)[C@H](O)[C@@H](O)[C@H]5O)[C@@H](O)[C@H](O)[C@H]4O)cc3o2)cc1O	L6000-Targetmol-Natural Compound Library-1680cpds	0.494247
O=C(O)c1cccnc1	L6000-Targetmol-Natural Compound Library-1680cpds	0.338636
CC1(C)C2CC[C@@]1(C)C(=O)C2	L6000-Targetmol-Natural Compound Library-1680cpds	0.382812
NCCCS(=O)(=O)O	L6000-Targetmol-Natural Compound Library-1680cpds	0.409836
CCCCCCCCCCCCCCCCCCCCCCO	L6000-Targetmol-Natural Compound Library-1680cpds	0.34375
OC[C@H]1O[C@H](O)[C@H](O)[C@@H](O)[C@@H]1O	L6000-Targetmol-Natural Compound Library-1680cpds	0.481043
Cn1c(=O)c2c(ncn2CC(O)CO)n(C)c1=O	L6000-Targetmol-Natural Compound Library-1680cpds	0.447917
Cc1ncc(C[n+]2csc(CCO)c2C)c(N)n1.Cl.[Cl-]	L6000-Targetmol-Natural Compound Library-1680cpds	0.343923
CN(C)[C@@H]1C(O)=C(C(N)=O)C(=O)[C@@]2(O)C(O)=C3C(=O)c4c(O)cccc4[C@@](C)(O)[C@H]3[C@H](O)C12	L6000-Targetmol-Natural Compound Library-1680cpds	0.694118
Cc1ncc(CSSCc2cnc(C)c(O)c2CO)c(CO)c1O	L6000-Targetmol-Natural Compound Library-1680cpds	0.479757
CN(C)[C@@H]1C(O)=C(C(N)=O)C(=O)[C@@]2(O)C(O)=C3C(=O)c4c(O)cccc4[C@@](C)(O)[C@H]3C[C@@H]12.Cl	L6000-Targetmol-Natural Compound Library-1680cpds	0.684129
NC(=O)NC1NC(=O)NC1=O	L6000-Targetmol-Natural Compound Library-1680cpds	0.374233
O=C(O)CCCCCCCC(=O)O	L6000-Targetmol-Natural Compound Library-1680cpds	0.36
O=C1O[C@H]([C@@H](O)CO)C(O)=C1O	L6000-Targetmol-Natural Compound Library-1680cpds	0.405076
O=C1O[C@H](CO)[C@@H](O)[C@H](O)[C@H]1O	L6000-Targetmol-Natural Compound Library-1680cpds	0.366826
NC(=O)c1cccnc1	L6000-Targetmol-Natural Compound Library-1680cpds	0.357918
Cc1cc2nc3c(=O)[nH]c(=O)nc-3n(C[C@H](O)[C@H](O)[C@H](O)CO)c2cc1C	L6000-Targetmol-Natural Compound Library-1680cpds	0.540154
C/C=C/C[C@@H](C)[C@@H](O)C1C(=O)N[C@@H](CC)C(=O)N(C)CC(=O)N(C)[C@@H](CC(C)C)C(=O)N[C@@H](C(C)C)C(=O)N(C)[C@@H](CC(C)C)C(=O)N[C@@H](C)C(=O)N[C@H](C)C(=O)N(C)[C@@H](CC(C)C)C(=O)N(C)[C@@H](CC(C)C)C(=O)N(C)[C@@H](C(C)C)C(=O)N1C	L6000-Targetmol-Natural Compound Library-1680cpds	0.398929
C[C@]12C[C@H](O)[C@H]3[C@@H](CCC4=CC(=O)CC[C@@]43C)[C@@H]1CC[C@@H]2C(=O)CO	L6000-Targetmol-Natural Compound Library-1680cpds	0.599644
NC[C@@H]1O[C@H](O[C@@H]2[C@@H](CO)O[C@@H](O[C@@H]3[C@@H](O)[C@H](N)C[C@H](N)[C@H]3O[C@H]3O[C@H](CN)[C@@H](O)[C@H](O)[C@H]3N)[C@@H]2O)[C@H](N)[C@@H](O)[C@@H]1O.O=S(=O)(O)O.O=S(=O)(O)O.O=S(=O)(O)O	L6000-Targetmol-Natural Compound Library-1680cpds	0.380079
CC[C@H](C)[C@H]1O[C@]2(C=C[C@@H]1C)C[C@@H]1C[C@@H](C/C=C(\C)[C@@H](O[C@H]3C[C@H](OC)[C@@H](O[C@H]4C[C@H](OC)[C@@H](O)[C@H](C)O4)[C@H](C)O3)[C@@H](C)/C=C/C=C3\CO[C@@H]4[C@H](O)C(C)=C[C@@H](C(=O)O1)[C@]34O)O2.CO[C@H]1C[C@H](O[C@H]2[C@H](C)O[C@@H](O[C@@H]3/C(C)=C/C[C@@H]4C[C@@H](C[C@]5(C=C[C@H](C)[C@@H](C(C)C)O5)O4)OC(=O)[C@@H]4C=C(C)[C@@H](O)[C@H]5OC/C(=C\C=C\[C@@H]3C)[C@@]45O)C[C@@H]2OC)O[C@@H](C)…	L6000-Targetmol-Natural Compound Library-1680cpds	0.544202
CC1(C)S[C@@H]2[C@H](NC(=O)Cc3ccccc3)C(=O)N2[C@H]1C(=O)[O-].[Na+]	L6000-Targetmol-Natural Compound Library-1680cpds	0.480801
CN1[C@H]2CC[C@@H]1C[C@H](OC(=O)[C@H](CO)c1ccccc1)C2	L6000-Targetmol-Natural Compound Library-1680cpds	0.472665
NCCc1cnc[nH]1	L6000-Targetmol-Natural Compound Library-1680cpds	0.382883
O=C(O)c1cc(O)c2c(c1)C([C@H]1c3cc(C(=O)O)cc(O)c3C(=O)c3c(O[C@@H]4O[C@H](CO)[C@@H](O)[C@H](O)[C@H]4O)cccc31)c1cccc(O[C@@H]3O[C@H](CO)[C@@H](O)[C@H](O)[C@H]3O)c1C2=O	L6000-Targetmol-Natural Compound Library-1680cpds	0.53554
CCCCCCCCCC(=O)NC1C(Oc2c3cc4cc2Oc2ccc(cc2Cl)C(OC2OC(CO)C(O)C(O)C2NC(C)=O)C2NC(=O)C(NC(=O)C4NC(=O)C4NC(=O)C(Cc5ccc(c(Cl)c5)O3)NC(=O)C(N)c3ccc(O)c(c3)Oc3cc(O)cc4c3)c3ccc(O)c(c3)-c3c(OC4OC(CO)C(O)C(O)C4O)cc(O)cc3C(C(=O)O)NC2=O)OC(CO)C(O)C1O	L6000-Targetmol-Natural Compound Library-1680cpds	0.714932
CC(=O)O[C@H]1C(=O)[C@@]2(C)C([C@@H](OC(=O)c3ccccc3)[C@]3(O)C[C@H](OC(=O)[C@H](O)[C@@H](NC(=O)c4ccccc4)c4ccccc4)C(C)=C1C3(C)C)[C@]1(OC(C)=O)CO[C@@H]1C[C@@H]2O	L6000-Targetmol-Natural Compound Library-1680cpds	0.594538
CO[C@H]1C[C@H](O[C@H]2[C@H](C)O[C@@H](O[C@@H]3/C(C)=C/C[C@@H]4C[C@@H](C[C@]5(C=C[C@H](C)[C@@H](C6CCCCC6)O5)O4)OC(=O)[C@@H]4C=C(C)[C@@H](O)[C@H]5OC/C(=C\C=C\[C@@H]3C)[C@@]45O)C[C@@H]2OC)O[C@@H](C)[C@@H]1O	L6000-Targetmol-Natural Compound Library-1680cpds	0.54535
CN1C2CC(OC(=O)C(CO)c3ccccc3)CC1C(O)C2	L6000-Targetmol-Natural Compound Library-1680cpds	0.385638
CC[C@H]1OC(=O)[C@H](C)[C@@H](O[C@H]2C[C@@](C)(OC)[C@@H](O)[C@H](C)O2)[C@H](C)[C@@H](O[C@@H]2O[C@H](C)C[C@H](N(C)C)[C@H]2O)[C@](C)(O)C[C@@H](C)[C@@H]2N[C@@H](COCCOC)O[C@H]([C@H]2C)[C@]1(C)O	L6000-Targetmol-Natural Compound Library-1680cpds	0.477457
Cc1ncc(CO)c(CO)c1O	L6000-Targetmol-Natural Compound Library-1680cpds	0.397476
Cc1ncc(CO)c(CO)c1O.Cl	L6000-Targetmol-Natural Compound Library-1680cpds	0.397476
CO[C@@H]1[C@@H](OC(N)=O)[C@@H](O)[C@H](Oc2ccc3c(O)c(NC(=O)c4ccc([O-])c(CC=C(C)C)c4)c(=O)oc3c2C)OC1(C)C.[Na+]	L6000-Targetmol-Natural Compound Library-1680cpds	0.609342
CC(C)(CO)[C@@H](O)C(=O)NCCC(=O)NCCSSCCNC(=O)CCNC(=O)[C@H](O)C(C)(C)CO	L6000-Targetmol-Natural Compound Library-1680cpds	0.469636
COc1ccc2c(c1OC)C(=O)O[C@@H]2C1c2c(cc3c(c2OC)OCO3)CC[NH+]1C.[Cl-]	L6000-Targetmol-Natural Compound Library-1680cpds	0.590597
CC(C)(S)[C@@H](N)C(=O)O	L6000-Targetmol-Natural Compound Library-1680cpds	0.421277
CC(=O)OCC1=C(C(=O)O)N2C(=O)[C@@H](N)[C@H]2SC1	L6000-Targetmol-Natural Compound Library-1680cpds	0.46868
CC[C@H]1OC(=O)C[C@@H](O)[C@H](C)[C@@H](O[C@@H]2O[C@H](C)[C@@H](O[C@H]3C[C@@](C)(O)[C@@H](O)[C@H](C)O3)[C@H](N(C)C)[C@H]2O)[C@@H](CC=O)C[C@@H](C)C(=O)/C=C/C(C)=C/[C@@H]1CO[C@@H]1O[C@H](C)[C@@H](O)[C@@H](OC)[C@H]1OC	L6000-Targetmol-Natural Compound Library-1680cpds	0.502938
c1ccc(CNc2ncnc3nc[nH]c23)cc1	L6000-Targetmol-Natural Compound Library-1680cpds	0.462622
C[C@]12CC[C@@H]3c4ccc(O)cc4CC[C@H]3[C@@H]1CCC2=O	L6000-Targetmol-Natural Compound Library-1680cpds	0.488798
CC(=O)Oc1c(C)c(C)c2c(c1C)CC[C@@](C)(CCC[C@H](C)CCC[C@H](C)CCCC(C)C)O2	L6000-Targetmol-Natural Compound Library-1680cpds	0.396884
COc1cccc2c1C(=O)c1c(O)c3c(c(O)c1C2=O)C[C@@](O)(C(=O)CO)C[C@@H]3O[C@H]1C[C@H](N)[C@H](O)[C@H](C)O1.Cl	L6000-Targetmol-Natural Compound Library-1680cpds	0.62348
CN[C@H]1C[C@@H](N)[C@H](O)[C@@H](O[C@@H]2O[C@H](CO)[C@H](O)[C@@H]3OC4(O[C@H]23)O[C@H]([C@@H](N)CO)[C@H](O)[C@H](O)[C@H]4O)[C@@H]1O	L6000-Targetmol-Natural Compound Library-1680cpds	0.41169
O=c1cc(-c2ccc(O)c(O)c2)oc2cc(O)cc(O)c12	L6000-Targetmol-Natural Compound Library-1680cpds	0.37037
C[C@H]1[C@H](NC(=O)/C(=N\OC(C)(C)C(=O)O)c2csc(N)n2)C(=O)N1S(=O)(=O)O	L6000-Targetmol-Natural Compound Library-1680cpds	0.499451
CC[C@H]1OC(=O)[C@H](C)[C@@H](O[C@H]2C[C@@](C)(OC)[C@@H](O)[C@H](C)O2)[C@H](C)[C@@H](O[C@@H]2O[C@H](C)C[C@H](N(C)C)[C@H]2O)[C@](C)(O)C[C@@H](C)C(=O)[C@H](C)[C@@H](O)[C@]1(C)O	L6000-Targetmol-Natural Compound Library-1680cpds	0.473091
CC[C@@]1([C@@H]2OC([C@H]3O[C@@](O)(CO)[C@H](C)C[C@@H]3C)C[C@@H]2C)CCC([C@]2(C)CC[C@]3(C[C@H](O)[C@@H](C)C([C@@H](C)[C@@H](OC)[C@H](C)C(=O)[O-])O3)O2)O1.[Na+]	L6000-Targetmol-Natural Compound Library-1680cpds	0.435685
CC(=O)O[C@@]12CO[C@@H]1C[C@H](O)[C@@]1(C)C(=O)[C@H](O)C3=C(C)[C@@H](OC(=O)[C@H](O)[C@@H](NC(=O)OC(C)(C)C)c4ccccc4)C[C@@](O)([C@@H](OC(=O)c4ccccc4)C12)C3(C)C	L6000-Targetmol-Natural Compound Library-1680cpds	0.59189
COc1ccc([C@@H]2CC(=O)c3c(O)cc(O[C@@H]4O[C@H](CO[C@@H]5O[C@@H](C)[C@H](O)[C@@H](O)[C@H]5O)[C@@H](O)[C@H](O)[C@H]4O)cc3O2)cc1O	L6000-Targetmol-Natural Compound Library-1680cpds	0.63709
CC1=C2N=C(C=C3N=C(C(C)=C4[C@@H](CCC(N)=O)[C@](C)(CC(N)=O)[C@](C)([C@@H]5N=C1[C@](C)(CCC(=O)NC[C@@H](C)OP(=O)([O-])O[C@@H]1[C@@H](CO)O[C@H](n6cnc7cc(C)c(C)cc76)[C@@H]1O)[C@H]5CC(N)=O)N4[Co+]C#N)[C@@](C)(CC(N)=O)[C@@H]3CCC(N)=O)C(C)(C)[C@@H]2CCC(N)=O	L6000-Targetmol-Natural Compound Library-1680cpds	0.705882
C[C@]12CC[C@@H]3c4ccc(O)cc4CC[C@H]3[C@@H]1CC[C@@H]2O	L6000-Targetmol-Natural Compound Library-1680cpds	0.502597
CC1=C(/C=C/C(C)=C/C=C/C(C)=C/C(=O)O)C(C)(C)CCC1	L6000-Targetmol-Natural Compound Library-1680cpds	0.511222
COc1cc(CNC(=O)CCCC/C=C/C(C)C)ccc1O	L6000-Targetmol-Natural Compound Library-1680cpds	0.416667
C[C@@H]1OC(=O)C[C@H](O)C[C@H](O)CC[C@@H](O)[C@H](O)C[C@H](O)C[C@]2(O)C[C@H](O)[C@@H](C(=O)O)[C@H](C[C@@H](O[C@@H]3O[C@H](C)[C@@H](O)[C@H](N)[C@@H]3O)/C=C/C=C/C=C/C=C/C=C/C=C/C=C/[C@H](C)[C@@H](O)[C@H]1C)O2	L6000-Targetmol-Natural Compound Library-1680cpds	0.522465
CNCC(O)c1ccc(O)c(O)c1.Cl	L6000-Targetmol-Natural Compound Library-1680cpds	0.595679
CC1=C(C/C=C(\C)CCC[C@H](C)CCC[C@H](C)CCCC(C)C)C(=O)c2ccccc2C1=O	L6000-Targetmol-Natural Compound Library-1680cpds	0.366452
NCCS	L6000-Targetmol-Natural Compound Library-1680cpds	0.1875
S=C=NCc1ccccc1	L6000-Targetmol-Natural Compound Library-1680cpds	0.385281
Cn1c(=O)c2[nH]cnc2n(C)c1=O	L6000-Targetmol-Natural Compound Library-1680cpds	0.378827
CN[C@@H]1[C@@H](O[C@H]2O[C@H](CO)[C@@H](N)[C@H](O)[C@H]2O)O[C@H]2C[C@@H](N)[C@@H](O[C@@H]3[C@@H](N)C[C@@H](N)[C@H](O)[C@H]3O)O[C@@H]2[C@@H]1O.O=S(=O)(O)O	L6000-Targetmol-Natural Compound Library-1680cpds	0.405473
N[C@@H](CCC(=O)N[C@@H](CS)C(=O)NCC(=O)O)C(=O)O	L6000-Targetmol-Natural Compound Library-1680cpds	0.339323
C=C1CC[C@H](O)C/C1=C/C=C1\CCC[C@]2(C)C([C@H](C)/C=C/[C@H](C)C(C)C)CC[C@@H]12	L6000-Targetmol-Natural Compound Library-1680cpds	0.458929
CCC(C)CCCCC(=O)NC(CCN)C(=O)NC(C(=O)NC(CCN)C(=O)NC1CCNC(=O)C(C(C)O)NC(=O)C(CCN)NC(=O)C(CCN)NC(=O)C(CC(C)C)NC(=O)C(Cc2ccccc2)NC(=O)C(CCN)NC1=O)C(C)O.O=S(=O)(O)O	L6000-Targetmol-Natural Compound Library-1680cpds	0.369759
NC[C@@H]1O[C@H](O[C@@H]2[C@@H](CO)O[C@@H](O[C@@H]3[C@@H](O)[C@H](N)C[C@H](N)[C@H]3O[C@H]3O[C@H](CO)[C@@H](O)[C@H](O)[C@H]3N)[C@@H]2O)[C@H](N)[C@@H](O)[C@@H]1O.O=S(=O)(O)O	L6000-Targetmol-Natural Compound Library-1680cpds	0.380079
O=C(O)CCCC[C@@H]1SC[C@@H]2NC(=O)N[C@H]12	L6000-Targetmol-Natural Compound Library-1680cpds	0.443992
COc1cc([C@@H]2c3cc4c(cc3[C@H](O)[C@H]3COC(=O)[C@H]23)OCO4)cc(OC)c1OC	L6000-Targetmol-Natural Compound Library-1680cpds	0.484697
CC[C@@]1(O)C(=O)OCc2c1cc1n(c2=O)Cc2cc3ccccc3nc2-1	L6000-Targetmol-Natural Compound Library-1680cpds	0.638243
CC(C)=CCC(O)C1=CC(=O)c2c(O)ccc(O)c2C1=O	L6000-Targetmol-Natural Compound Library-1680cpds	0.420591
CC1(C)S[C@@H]2[C@H](NC(=O)COc3ccccc3)C(=O)N2[C@H]1C(=O)[O-].[K+]	L6000-Targetmol-Natural Compound Library-1680cpds	0.483296
CC(C)C[C@@H](NC(=O)[C@H](C)NC(=O)CNC(=O)[C@@H](NC=O)C(C)C)C(=O)N[C@@H](C)C(=O)N[C@@H](C(=O)N[C@H](C(=O)N[C@H](C(=O)N[C@@H](Cc1c[nH]c2ccccc12)C(=O)N[C@H](CC(C)C)C(=O)N[C@@H](Cc1c[nH]c2ccccc12)C(=O)N[C@H](CC(C)C)C(=O)N[C@@H](Cc1c[nH]c2ccccc12)C(=O)N[C@H](CC(C)C)C(=O)N[C@@H](Cc1c[nH]c2ccccc12)C(=O)NCCO)C(C)C)C(C)C)C(C)C	L6000-Targetmol-Natural Compound Library-1680cpds	0.427835
CC[C@H](C)C1O[C@]2(CC[C@@H]1C)C[C@@H]1C[C@@H](C/C=C(\C)[C@@H](O[C@H]3C[C@H](OC)[C@@H](O[C@H]4C[C@H](OC)[C@@H](O)[C@H](C)O4)[C@H](C)O3)[C@@H](C)/C=C/C=C3\CO[C@@H]4[C@H](O)C(C)=C[C@@H](C(=O)O1)[C@]34O)O2	L6000-Targetmol-Natural Compound Library-1680cpds	0.545455
C=C1CC[C@H](O)C/C1=C\C=C1/CCC[C@]2(C)C([C@H](C)CCCC(C)C)CC[C@@H]12	L6000-Targetmol-Natural Compound Library-1680cpds	0.453571
C[C@H](CCC(=O)NCCS(=O)(=O)[O-])[C@H]1CC[C@H]2C3[C@H](C[C@H](O)[C@@]21C)[C@@]1(C)CC[C@@H](O)C[C@H]1C[C@H]3O.[Na+]	L6000-Targetmol-Natural Compound Library-1680cpds	0.409171
CC[C@H]1OC(=O)[C@H](C)[C@@H](O[C@H]2C[C@@](C)(OC)[C@@H](O)[C@H](C)O2)[C@H](C)[C@@H](O[C@@H]2O[C@H](C)C[C@H](N(C)C)[C@H]2O)[C@](C)(O)C[C@@H](C)/C(=N\OCOCCOC)[C@H](C)[C@@H](O)[C@]1(C)O	L6000-Targetmol-Natural Compound Library-1680cpds	0.479142
Cl.O=C1c2cccc3c2[C@H](CCC3)CN1[C@@H]1CN2CCC1CC2	L6000-Targetmol-Natural Compound Library-1680cpds	0.514902
CC(=O)O[C@H]1C[C@@]2(C)[C@@H](C[C@@H](O)C3[C@@]4(C)CC[C@@H](O)[C@@H](C)[C@@H]4CC[C@@]32C)/C1=C(\CCC=C(C)C)C(=O)O	L6000-Targetmol-Natural Compound Library-1680cpds	0.61699
CC[C@@]1(O)C(=O)OCc2c1cc1n(c2=O)Cc2cc3c(CN(C)C)c(O)ccc3nc2-1.Cl	L6000-Targetmol-Natural Compound Library-1680cpds	0.667009
COc1cc2ncnc(Nc3ccc(F)c(Cl)c3)c2cc1OCCCN1CCOCC1	L6000-Targetmol-Natural Compound Library-1680cpds	1
C=CC1=C(C)c2cc3[nH]c(cc4nc(cc5[nH]c(cc1n2)c(C)c5C=C)C(C)=C4CCC(=O)O)c(CCC(=O)O)c3C	L6000-Targetmol-Natural Compound Library-1680cpds	0.49417
CN1C(=O)CC[C@H]1c1cccnc1	L6000-Targetmol-Natural Compound Library-1680cpds	0.460651
O=C(N[C@H](CO)[C@H](O)c1ccc([N+](=O)[O-])cc1)C(Cl)Cl	L6000-Targetmol-Natural Compound Library-1680cpds	0.455105
CC[C@H](C)C(=O)O[C@H]1C[C@@H](C)C=C2C=C[C@H](C)[C@H](CC[C@@H]3C[C@@H](O)CC(=O)O3)[C@H]21	L6000-Targetmol-Natural Compound Library-1680cpds	0.605547
C[N+](C)(C)CCOP(=O)([O-])OP(=O)([O-])OC[C@H]1O[C@@H](n2ccc(N)nc2=O)[C@H](O)[C@@H]1O.[Na+]	L6000-Targetmol-Natural Compound Library-1680cpds	0.469873
NC[C@H]1O[C@H](O[C@@H]2[C@@H](N)C[C@@H](N)[C@H](O)[C@H]2O[C@@H]2O[C@H](CO)[C@@H](O)[C@H]2O)[C@H](N)[C@@H](O)[C@@H]1O.O=S(=O)(O)O	L6000-Targetmol-Natural Compound Library-1680cpds	0.378628
CN[C@@H]1[C@@H](O)[C@@H](O[C@@H]2[C@@H](O)[C@H](O[C@H]3OC(CN)=CC[C@H]3N)[C@@H](N)C[C@H]2N)OC[C@]1(C)O.CN[C@@H]1[C@@H](O)[C@@H](O[C@@H]2[C@@H](O)[C@H](O[C@H]3OC(CN)=CC[C@H]3N)[C@@H](N)C[C@H]2N)OC[C@]1(C)O.O=S(=O)(O)O.O=S(=O)(O)O.O=S(=O)(O)O.O=S(=O)(O)O.O=S(=O)(O)O	L6000-Targetmol-Natural Compound Library-1680cpds	0.425455
CC(=O)OCC[N+](C)(C)C.[Cl-]	L6000-Targetmol-Natural Compound Library-1680cpds	0.464
CC[C@@H]1C(=O)OC[C@@H]1Cc1cncn1C.O=[N+]([O-])O	L6000-Targetmol-Natural Compound Library-1680cpds	0.466667
O=c1c(-c2ccc(O)cc2)coc2cc(O)ccc12	L6000-Targetmol-Natural Compound Library-1680cpds	0.486762
CCC(C)CCCC(=O)N[C@@H](CCN)C(=O)N[C@H](C(=O)N[C@@H](CCN)C(=O)N[C@H]1CCNC(=O)C([C@@H](C)O)NC(=O)[C@H](CCN)NC(=O)[C@H](CCN)NC(=O)[C@H](CC(C)C)NC(=O)[C@@H](CC(C)C)NC(=O)[C@H](CCN)NC1=O)[C@@H](C)O.O=S(=O)(O)O	L6000-Targetmol-Natural Compound Library-1680cpds	0.41649
CC(=O)O[C@@H]1C[C@@H]2CC[C@@]1(C)C2(C)C	L6000-Targetmol-Natural Compound Library-1680cpds	0.604775
NC[C@H]1O[C@H](O[C@@H]2[C@@H](N)C[C@@H](N)[C@H](O[C@H]3O[C@H](CO)[C@@H](O)[C@H](N)[C@H]3O)[C@H]2O)[C@H](N)C[C@@H]1O	L6000-Targetmol-Natural Compound Library-1680cpds	0.497462
CC(C)C[C@H](NC(=O)[C@@H](O)[C@H](N)Cc1ccccc1)C(=O)O	L6000-Targetmol-Natural Compound Library-1680cpds	0.444196
CC(=O)O[C@]1(C(C)=O)CC[C@H]2[C@@H]3C[C@H](C)C4=CC(=O)CC[C@]4(C)[C@H]3CC[C@@]21C	L6000-Targetmol-Natural Compound Library-1680cpds	0.671074
C#C[C@]1(O)CC[C@H]2[C@@H]3CCC4=CC(=O)CC[C@@H]4[C@H]3CC[C@@]21CC	L6000-Targetmol-Natural Compound Library-1680cpds	0.54078
CC[C@]1(O)C[C@H]2CN(CCc3c([nH]c4ccccc34)[C@@](C(=O)OC)(c3cc4c(cc3OC)N(C=O)[C@H]3[C@@](O)(C(=O)OC)[C@H](OC(C)=O)[C@]5(CC)C=CCN6CC[C@]43[C@@H]65)C2)C1.O=S(=O)(O)O	L6000-Targetmol-Natural Compound Library-1680cpds	0.761268
Nc1ccn([C@@H]2O[C@H](CO)[C@@H](O)[C@@H]2O)c(=O)n1	L6000-Targetmol-Natural Compound Library-1680cpds	0.421488
CC(=O)Oc1cccc2c1C(=O)c1c(OC(C)=O)cc(C(=O)O)cc1C2=O	L6000-Targetmol-Natural Compound Library-1680cpds	0.398148
CCC[C@@H]1C[C@@H](C(=O)N[C@H]([C@@H](C)O)[C@H]2O[C@H](SC)[C@H](O)[C@@H](O)[C@H]2O)N(C)C1.Cl	L6000-Targetmol-Natural Compound Library-1680cpds	0.442319
COc1ccc(-c2cc(=S)ss2)cc1	L6000-Targetmol-Natural Compound Library-1680cpds	0.333333
CC[C@]12CCCN3CCc4c(n(c5ccccc45)[C@@](O)(C(=O)OC)C1)[C@@H]32	L6000-Targetmol-Natural Compound Library-1680cpds	0.68254
CNCC(O)c1ccc(O)cc1	L6000-Targetmol-Natural Compound Library-1680cpds	0.474684
C=CCc1ccc(O)c(OC)c1	L6000-Targetmol-Natural Compound Library-1680cpds	0.553797
COc1ccccc1O	L6000-Targetmol-Natural Compound Library-1680cpds	0.369863
CN(C)[C@@H]1C(O)=C(C(N)=O)C(=O)[C@@]2(O)C(O)=C3C(=O)c4c(O)ccc(Cl)c4[C@@](C)(O)[C@H]3C[C@@H]12.Cl	L6000-Targetmol-Natural Compound Library-1680cpds	0.700614
Nc1ccc(C(=O)O)cc1	L6000-Targetmol-Natural Compound Library-1680cpds	0.520548
C=C[C@H]1CN2CC[C@H]1CC2[C@H](O)c1ccnc2ccccc12	L6000-Targetmol-Natural Compound Library-1680cpds	0.412679
CCCCCCCCC(=O)NCc1ccc(O)c(OC)c1	L6000-Targetmol-Natural Compound Library-1680cpds	0.414079
CO[C@H]1O[C@@H]2O[C@@]3(C)CC[C@H]4[C@H](C)CC[C@@H]([C@H]1C)[C@]42OO3	L6000-Targetmol-Natural Compound Library-1680cpds	0.442432
N[C@@H](COP(=O)(O)O)C(=O)O	L6000-Targetmol-Natural Compound Library-1680cpds	0.482609
CNC1C(O)C(OC2C(N)CC(N)C(OC3OC(C(C)N)CCC3N)C2O)OCC1(C)O	L6000-Targetmol-Natural Compound Library-1680cpds	0.396684
Cc1cc2nc3c(=O)[nH]c(=O)nc-3n(C[C@H](O)[C@H](O)[C@H](O)COP(=O)([O-])O)c2cc1C.[Na+]	L6000-Targetmol-Natural Compound Library-1680cpds	0.550598
CC[C@H]1CN2CC[C@H]1C[C@@H]2[C@@H](O)c1ccnc2ccc(OC)cc12	L6000-Targetmol-Natural Compound Library-1680cpds	0.442112
COc1c(C)c2c(c(O)c1C/C=C(\C)CCC(=O)O)C(=O)OC2	L6000-Targetmol-Natural Compound Library-1680cpds	0.439479
Nc1ncnc2c1ncn2[C@@H]1O[C@H](COP(=O)(O)OP(=O)([O-])OP(=O)([O-])O)[C@@H](O)[C@H]1O.[Na+].[Na+]	L6000-Targetmol-Natural Compound Library-1680cpds	0.526383
CC1(O)CCOC(=O)C1	L6000-Targetmol-Natural Compound Library-1680cpds	0.554622
CC(=O)NCCc1c[nH]c2ccc(O)cc12	L6000-Targetmol-Natural Compound Library-1680cpds	0.472603
O=c1[nH]cnc2[nH]cnc12	L6000-Targetmol-Natural Compound Library-1680cpds	0.473054
COC(=O)c1ccc(O)c(O)c1	L6000-Targetmol-Natural Compound Library-1680cpds	0.512048
N[C@@H](Cc1c[nH]c2ccc(O)cc12)C(=O)O	L6000-Targetmol-Natural Compound Library-1680cpds	0.514477
COC1=CC(=O)C[C@@H](C)[C@]12Oc1c(Cl)c(OC)cc(OC)c1C2=O	L6000-Targetmol-Natural Compound Library-1680cpds	0.602957
CC(C)(CO)C(O)C(=O)NCCCO	L6000-Targetmol-Natural Compound Library-1680cpds	0.386179
Cc1cc(=O)oc2cc(O)ccc12	L6000-Targetmol-Natural Compound Library-1680cpds	0.4
OC[C@H]1O[C@H](O[C@]2(CCl)O[C@H](CCl)[C@@H](O)[C@@H]2O)[C@H](O)[C@@H](O)[C@H]1Cl	L6000-Targetmol-Natural Compound Library-1680cpds	0.369427
CN(C)[C@@H]1C(O)=C(C(N)=O)C(=O)[C@@]2(O)C(O)=C3C(=O)c4c(O)ccc(Cl)c4[C@@H](O)[C@H]3C[C@@H]12.Cl	L6000-Targetmol-Natural Compound Library-1680cpds	0.684833
CC(C)[C@@H]1CC[C@@H](C)C[C@H]1O	L6000-Targetmol-Natural Compound Library-1680cpds	0.412281
CC[C@H]1OC(=O)[C@H](C)[C@@H](O[C@H]2C[C@@](C)(OC)[C@@H](O)[C@H](C)O2)[C@H](C)[C@@H](O[C@@H]2O[C@H](C)C[C@H](N(C)C)[C@H]2O)[C@](C)(O)C[C@@H](C)CN(C)[C@H](C)[C@@H](O)[C@]1(C)O.O.O	L6000-Targetmol-Natural Compound Library-1680cpds	0.48665
C#C[C@]1(O)CC[C@H]2[C@@H]3CCc4cc(O)ccc4[C@H]3CC[C@@]21C	L6000-Targetmol-Natural Compound Library-1680cpds	0.433834
CC(=O)[C@@]1(O)CC[C@H]2[C@@H]3CCC4=CC(=O)CC[C@]4(C)[C@H]3CC[C@@]21C	L6000-Targetmol-Natural Compound Library-1680cpds	0.57913
COc1c2occc2c(OC)c2c(=O)cc(C)oc12	L6000-Targetmol-Natural Compound Library-1680cpds	0.395683
CC(C)(CO)[C@@H](O)C(=O)NCCCO	L6000-Targetmol-Natural Compound Library-1680cpds	0.386179
CC1NC(=O)C(N)CNC(=O)C(C2CCN=C(N)N2)NC(=O)C(=CNC(N)=O)NC(=O)C(CNC(=O)CC(N)CCCN)NC1=O.O=S(=O)(O)O	L6000-Targetmol-Natural Compound Library-1680cpds	0.383085
C/C(=C\C(=O)OCCCCCCCCC(=O)O)C[C@@H]1OC[C@H](C[C@@H]2OC2[C@@H](C)[C@H](C)O)[C@@H](O)[C@H]1O	L6000-Targetmol-Natural Compound Library-1680cpds	0.544479
Nc1ncnc2c1ncn2[C@@H]1O[C@H](CO)[C@@H](O)[C@@H]1O	L6000-Targetmol-Natural Compound Library-1680cpds	0.511186
CN(N=O)C(=O)N[C@H]1[C@@H](O)O[C@H](CO)[C@@H](O)[C@@H]1O	L6000-Targetmol-Natural Compound Library-1680cpds	0.400261
Nc1ncn([C@H]2C[C@H](O)[C@@H](CO)O2)c(=O)n1	L6000-Targetmol-Natural Compound Library-1680cpds	0.345855
COc1cccc2c1C(=O)c1c(O)c3c(c(O)c1C2=O)C[C@@](O)(C(C)=O)C[C@@H]3O[C@H]1C[C@H](N)[C@H](O)[C@H](C)O1.Cl	L6000-Targetmol-Natural Compound Library-1680cpds	0.618972
COc1cc(/C=C/C(=O)CC(=O)/C=C/c2ccc(O)c(OC)c2)ccc1O	L6000-Targetmol-Natural Compound Library-1680cpds	0.401138
CCC1(O)C(=O)OCc2c1cc1n(c2=O)Cc2cc3cc(O)ccc3nc2-1	L6000-Targetmol-Natural Compound Library-1680cpds	0.642599
CO[C@H]1C[C@@H]2CC[C@@H](C)[C@@](O)(O2)C(=O)C(=O)N2CCCC[C@H]2C(=O)OC([C@H](C)C[C@@H]2CC[C@@H](O)[C@H](OC)C2)CC(=O)[C@H](C)/C=C(\C)[C@@H](O)[C@@H](OC)C(=O)[C@H](C)C[C@H](C)/C=C/C=C/C=C\1C	L6000-Targetmol-Natural Compound Library-1680cpds	0.517594
COc1c2occc2cc2ccc(=O)oc12	L6000-Targetmol-Natural Compound Library-1680cpds	0.434511
Oc1ccc(/C=C/c2cc(O)cc(O)c2)cc1	L6000-Targetmol-Natural Compound Library-1680cpds	0.42236
C[C@]12CC[C@@H]3c4ccc(O)cc4CC[C@H]3[C@@H]1C[C@@H](O)[C@@H]2O	L6000-Targetmol-Natural Compound Library-1680cpds	0.440056
N[C@@H]1CONC1=O	L6000-Targetmol-Natural Compound Library-1680cpds	0.392857
Cl.N=c1ccn2c(n1)O[C@H]1[C@H](O)[C@@H](CO)O[C@H]12	L6000-Targetmol-Natural Compound Library-1680cpds	0.469197
Nc1ccn([C@@H]2O[C@H](CO)[C@@H](O)[C@H]2O)c(=O)n1	L6000-Targetmol-Natural Compound Library-1680cpds	0.421488
NC(=O)c1ccc[n+]([C@@H]2O[C@H](COP(=O)([O-])OP(=O)(O)OC[C@H]3O[C@@H](n4cnc5c(N)ncnc54)[C@H](O)[C@@H]3O)[C@@H](O)[C@H]2O)c1	L6000-Targetmol-Natural Compound Library-1680cpds	0.569526
CC1=C(/C=C/C(C)=C/C=C/C(C)=C\C(=O)O)C(C)(C)CCC1	L6000-Targetmol-Natural Compound Library-1680cpds	0.511222
C[C@]12C[C@H](O)C3[C@@H](CCC4=CC(=O)CC[C@@]43C)[C@@H]1CC[C@]2(O)C(=O)CO	L6000-Targetmol-Natural Compound Library-1680cpds	0.612211
CC1=C(/C=C/C(C)=C/C=C/C(C)=C/C=C/C=C(C)/C=C/C=C(C)/C=C/C2=C(C)CCCC2(C)C)C(C)(C)CCC1	L6000-Targetmol-Natural Compound Library-1680cpds	0.455243
CC(=O)N[C@H]1C([C@H](O)[C@H](O)CO)O[C@](O)(C(=O)O)C[C@@H]1O	L6000-Targetmol-Natural Compound Library-1680cpds	0.415328
Cl.NCCc1ccc(O)c(O)c1	L6000-Targetmol-Natural Compound Library-1680cpds	0.585965
Cc1c(C)c2c(c(C)c1O)CC[C@@](C)(CCC[C@H](C)CCC[C@H](C)CCCC(C)C)O2	L6000-Targetmol-Natural Compound Library-1680cpds	0.395062
N[C@@H](Cc1cc(I)c(Oc2ccc(O)c(I)c2)c(I)c1)C(=O)O	L6000-Targetmol-Natural Compound Library-1680cpds	0.451572
C[Se]CCC(N)C(=O)O	L6000-Targetmol-Natural Compound Library-1680cpds	0.354701
COc1ccc2[nH]cc(CCNC(C)=O)c2c1	L6000-Targetmol-Natural Compound Library-1680cpds	0.500677
COc1cc([C@H]2Oc3cc([C@H]4Oc5cc(O)cc(O)c5C(=O)[C@@H]4O)ccc3O[C@@H]2CO)ccc1O	L6000-Targetmol-Natural Compound Library-1680cpds	0.631076
Cl.NCC(=O)CCC(=O)O	L6000-Targetmol-Natural Compound Library-1680cpds	0.464
CC[C@]1(O)C[C@@H]2CN(CCc3c([nH]c4ccccc34)[C@@](C(=O)OC)(c3cc4c(cc3OC)N(C)[C@H]3[C@@](O)(C(=O)OC)[C@H](OC(C)=O)[C@]5(CC)C=CCN6CC[C@]43[C@@H]65)C2)C1.O=S(=O)(O)O	L6000-Targetmol-Natural Compound Library-1680cpds	0.758296
C[C@@H]1OC(=O)C[C@@H](O)C[C@@H](O)C[C@@H](O)CC[C@@H](O)[C@@H](O)C[C@]2(O)C[C@H](O)[C@@H](C(=O)O)[C@H](C[C@@H](O[C@@H]3O[C@H](C)[C@@H](O)[C@H](N)[C@@H]3O)/C=C\C=C/C=CC=CCCC=CC=C[C@H](C)[C@@H](O)[C@@H]1C)O2	L6000-Targetmol-Natural Compound Library-1680cpds	0.52046
Cn1c(=O)c2[nH]cnc2n(C)c1=O.Cn1c(=O)c2[nH]cnc2n(C)c1=O.NCCN	L6000-Targetmol-Natural Compound Library-1680cpds	0.382653
Oc1cc2c(cc1O)[C@@H]1c3ccc(O)c(O)c3OC[C@]1(O)C2	L6000-Targetmol-Natural Compound Library-1680cpds	0.45695
CCO.C[C@H]1c2cccc(O)c2C(=O)C2=C(O)[C@]3(O)C(=O)C(C(N)=O)=C(O)[C@@H](N(C)C)C3[C@@H](O)[C@@H]21.C[C@H]1c2cccc(O)c2C(=O)C2=C(O)[C@]3(O)C(=O)C(C(N)=O)=C(O)[C@@H](N(C)C)C3[C@@H](O)[C@@H]21.Cl.Cl.O	L6000-Targetmol-Natural Compound Library-1680cpds	0.677669
C[C@H](O)C1CC[C@H]2[C@@H]3CC[C@@H]4C[C@H](O)CC[C@]4(C)[C@H]3CC[C@]12C	L6000-Targetmol-Natural Compound Library-1680cpds	0.535865
O=c1ccc2ccc(O)cc2o1	L6000-Targetmol-Natural Compound Library-1680cpds	0.508658
NC(Cc1ccccc1O)C(=O)O	L6000-Targetmol-Natural Compound Library-1680cpds	0.501062
CCc1c2c(nc3ccc(O)cc13)-c1cc3c(c(=O)n1C2)COC(=O)[C@]3(O)CC	L6000-Targetmol-Natural Compound Library-1680cpds	0.659509
COc1ccc(-c2cc(=O)c3c(O)cc(O)cc3o2)cc1O	L6000-Targetmol-Natural Compound Library-1680cpds	0.387057
OC[C@H]1O[C@@H](n2cnc3c(O)ncnc32)C[C@@H]1O	L6000-Targetmol-Natural Compound Library-1680cpds	0.478528
COc1ccc2c(c1)[nH]c1c(C)nccc12	L6000-Targetmol-Natural Compound Library-1680cpds	0.486111
N[C@H]1[C@H](O[C@@H]2[C@@H](CO)O[C@@H](O)[C@H](N)[C@H]2O)O[C@H](CO)[C@@H](O)[C@@H]1O	L6000-Targetmol-Natural Compound Library-1680cpds	0.431818
C[C@@H]1O[C@@H](O[C@@H]2[C@@H](O)[C@H](OCCc3ccc(O)c(O)c3)O[C@H](CO[C@@H]3O[C@H](CO)[C@@H](O)[C@H](O)[C@H]3O)[C@H]2OC(=O)/C=C/c2ccc(O)c(O)c2)[C@H](O)[C@H](O)[C@H]1O	L6000-Targetmol-Natural Compound Library-1680cpds	0.43711
COc1c(O)cc2oc3cc(O)c(CC=C(C)C)c(O)c3c(=O)c2c1CC=C(C)C	L6000-Targetmol-Natural Compound Library-1680cpds	0.444952
C[C@]12CC[C@H](O)C[C@H]1CC[C@@H]1[C@@H]2CC[C@]2(C)[C@@H](c3ccc(=O)oc3)CC[C@]12O	L6000-Targetmol-Natural Compound Library-1680cpds	0.457931
O=c1ccn([C@H]2C[C@H](O)[C@@H](CO)O2)c(=O)[nH]1	L6000-Targetmol-Natural Compound Library-1680cpds	0.383459
Nc1ncnc2c1ncn2[C@@H]1O[C@H](COP(=O)(O)OP(=O)(O)O)[C@@H](O)[C@H]1O	L6000-Targetmol-Natural Compound Library-1680cpds	0.523748
O=c1c(-c2ccc(O)cc2)coc2cc(O)cc(O)c12	L6000-Targetmol-Natural Compound Library-1680cpds	0.371173
O=C1c2c(O)cc(O)cc2O[C@H](c2ccc(O)c(O)c2)[C@H]1O	L6000-Targetmol-Natural Compound Library-1680cpds	0.696639
Cn1cnc(N)c2ncnc1-2	L6000-Targetmol-Natural Compound Library-1680cpds	0.438743
COC(=O)C1=CC[C@]23CC[C@H]([C@@]2(C(=O)OC)CC1)[C@@](C)(/C=C/C=C(\C)C(=O)O)OC3=O	L6000-Targetmol-Natural Compound Library-1680cpds	0.65312
Nc1ncnc2c1ncn2[C@@H]1O[C@H](COP(=O)(O)O)[C@@H](O)[C@H]1O	L6000-Targetmol-Natural Compound Library-1680cpds	0.513089
O=C(O)C1=CO[C@@H](O[C@@H]2O[C@H](CO)[C@@H](O)[C@H](O)[C@H]2O)[C@@H]2C(CO)=CC[C@H]12	L6000-Targetmol-Natural Compound Library-1680cpds	0.488778
C=C1C(=O)O[C@H]2[C@H]1CC/C(C)=C\CC[C@@]1(C)O[C@@H]21	L6000-Targetmol-Natural Compound Library-1680cpds	0.536127
COC(=O)[C@H]1[C@@H](O)CC[C@H]2CN3CCc4c([nH]c5ccccc45)[C@@H]3C[C@@H]21.Cl	L6000-Targetmol-Natural Compound Library-1680cpds	0.525739
COc1c2ccoc2cc2oc(=O)ccc12	L6000-Targetmol-Natural Compound Library-1680cpds	0.429442
C=CC[C@@H]1/C=C(/C)C[C@H](C)C[C@H](OC)[C@H]2O[C@@](O)(C(=O)C(=O)N3CCCC[C@H]3C(=O)O[C@H](/C(C)=C/[C@@H]3CC[C@@H](O)[C@H](OC)C3)[C@H](C)[C@@H](O)CC1=O)[C@H](C)C[C@@H]2OC	L6000-Targetmol-Natural Compound Library-1680cpds	0.517937
COc1cc(CNC(=O)CCCCCCC(C)C)ccc1O	L6000-Targetmol-Natural Compound Library-1680cpds	0.421811
O=c1c(O)c(-c2ccc(O)c(O)c2)oc2cc(O)cc(O)c12	L6000-Targetmol-Natural Compound Library-1680cpds	0.400235
O=c1cc(-c2ccc(O)cc2)oc2cc(O)cc(O)c12	L6000-Targetmol-Natural Compound Library-1680cpds	0.360497
O=c1c(O)c(-c2ccc(O)cc2)oc2cc(O)cc(O)c12	L6000-Targetmol-Natural Compound Library-1680cpds	0.388756
CC(C)[C@]12O[C@H]1[C@@H]1O[C@@]13[C@@]1(C)CCC4=C(COC4=O)[C@@H]1C[C@@H]1O[C@@]13[C@@H]2O	L6000-Targetmol-Natural Compound Library-1680cpds	0.612686
Br.C[N+]1([O-])[C@H]2C[C@H](OC(=O)[C@H](CO)c3ccccc3)C[C@@H]1[C@H]1O[C@@H]21	L6000-Targetmol-Natural Compound Library-1680cpds	0.408759
Br.CN1[C@H]2C[C@H](OC(=O)[C@H](CO)c3ccccc3)C[C@@H]1[C@H]1O[C@@H]21.O.O.O	L6000-Targetmol-Natural Compound Library-1680cpds	0.399485
CCCC[N+]1(C)[C@H]2C[C@@H](OC(=O)[C@H](CO)c3ccccc3)C[C@@H]1[C@H]1O[C@@H]21.[Br-]	L6000-Targetmol-Natural Compound Library-1680cpds	0.400507
O=C1OC([C@@H](O)CO)C([O-])=C1OP(=O)([O-])[O-].[Na+].[Na+].[Na+]	L6000-Targetmol-Natural Compound Library-1680cpds	0.414634
C[C@]12CC[C@H]3[C@@H](CC[C@H]4C[C@@H](O)CC[C@@]43C)[C@@H]1CCC2=O	L6000-Targetmol-Natural Compound Library-1680cpds	0.46438
CC(=O)O[C@@]12CO[C@@H]1C[C@H](O)[C@@]1(C)C(=O)[C@H](O)C3=C(C)[C@@H](O)C[C@@](O)([C@@H](OC(=O)c4ccccc4)C12)C3(C)C	L6000-Targetmol-Natural Compound Library-1680cpds	0.552969
Br.COC(=O)C1=CCCN(C)C1	L6000-Targetmol-Natural Compound Library-1680cpds	0.455285
C[C@H](CCC(=O)O)[C@H]1CC[C@H]2[C@@H]3CC[C@@H]4C[C@H](O)CC[C@]4(C)[C@H]3CC[C@@]21C	L6000-Targetmol-Natural Compound Library-1680cpds	0.538793
Cn1c(=O)c2c(ncn2CC(=O)O)n(C)c1=O	L6000-Targetmol-Natural Compound Library-1680cpds	0.435867
C[C@]12CC(=O)[C@H]3[C@@H](CCC4=CC(=O)CC[C@@]43C)[C@@H]1CCC2=O	L6000-Targetmol-Natural Compound Library-1680cpds	0.527828
Cl.NCCc1c[nH]c2ccc(O)cc12	L6000-Targetmol-Natural Compound Library-1680cpds	0.456944
COC(=O)C1=CO[C@@H](O)[C@@H]2C(CO)=CC[C@H]12	L6000-Targetmol-Natural Compound Library-1680cpds	0.484935
COC(=O)C1=CO[C@@H](O[C@@H]2O[C@H](CO)[C@@H](O)[C@H](O)[C@H]2O)[C@@H]2C(CO)=CC[C@H]12	L6000-Targetmol-Natural Compound Library-1680cpds	0.496278
COc1cc(/C=C/C(=O)O)ccc1O	L6000-Targetmol-Natural Compound Library-1680cpds	0.514673
C/C=C(\C)C(=O)N[C@@H](c1ccccc1)[C@@H](O)C(=O)O[C@H]1C[C@@]2(O)[C@@H](OC(=O)c3ccccc3)C3[C@](C)(C(=O)[C@H](OC(C)=O)C(=C1C)C2(C)C)[C@@H](O)C[C@H]1OC[C@@]31OC(C)=O	L6000-Targetmol-Natural Compound Library-1680cpds	0.601047
COc1ccc(C[C@H](N)C(=O)N[C@@H]2[C@@H](CO)O[C@@H](n3cnc4c(N(C)C)ncnc43)[C@@H]2O)cc1.Cl.Cl	L6000-Targetmol-Natural Compound Library-1680cpds	0.595506
COc1cc2c(cc1O)CC[C@@H]1[C@@H]2CC[C@]2(C)[C@@H](O)CC[C@@H]12	L6000-Targetmol-Natural Compound Library-1680cpds	0.449315
O=c1ccn([C@@H]2O[C@H](CO)[C@@H](O)[C@H]2O)c(=O)[nH]1	L6000-Targetmol-Natural Compound Library-1680cpds	0.414779
c1coc(CNc2ncnc3nc[nH]c23)c1	L6000-Targetmol-Natural Compound Library-1680cpds	0.500536
C[C@@]12C[C@@]3(O)O[C@@H](O1)[C@]1(COC(=O)c4ccccc4)[C@H]3C[C@]21O[C@@H]1O[C@H](CO)[C@@H](O)[C@H](O)[C@H]1O	L6000-Targetmol-Natural Compound Library-1680cpds	0.466427
C[C@@H]1O[C@@H](O[C@H]2[C@H](O)[C@@H](O[C@@H]3O[C@@H](C)[C@H](O)[C@@H](O)[C@H]3O)[C@H](O[C@H]3CC[C@@]4(C)C(=CC[C@H]5[C@@H]6C[C@@H]7O[C@](O)(CC[C@@H](C)CO[C@@H]8O[C@H](CO)[C@@H](O)[C@H](O)[C@H]8O)[C@@H](C)C7[C@@]6(C)CC[C@@H]54)C3)O[C@@H]2CO)[C@H](O)[C@H](O)[C@H]1O	L6000-Targetmol-Natural Compound Library-1680cpds	0.552342
CC(C)=CCC/C(C)=C/CC/C(C)=C/CC/C(C)=C/CC1=C(C)C(=O)c2ccccc2C1=O	L6000-Targetmol-Natural Compound Library-1680cpds	0.348777
CC[C@@H]1/C=C(\C)C[C@H](C)C[C@H](OC)[C@H]2O[C@@](O)(C(=O)C(=O)N3CCCC[C@H]3C(=O)O[C@H](/C(C)=C/[C@@H]3CC[C@@H](O)[C@H](OC)C3)[C@H](C)[C@@H](O)CC1=O)[C@H](C)C[C@@H]2OC	L6000-Targetmol-Natural Compound Library-1680cpds	0.51856
C[C@H](CCC(=O)NCCS(=O)(=O)O)[C@H]1CC[C@H]2C3[C@@H](O)C[C@@H]4C[C@H](O)CC[C@]4(C)[C@H]3CC[C@@]21C	L6000-Targetmol-Natural Compound Library-1680cpds	0.389381
CO[C@H]1C[C@H]2OC[C@@]2(OC(C)=O)C2[C@H](OC(=O)c3ccccc3)[C@]3(O)C[C@H](OC(=O)[C@H](O)[C@@H](NC(=O)OC(C)(C)C)c4ccccc4)C(C)=C([C@@H](OC)C(=O)[C@@]21C)C3(C)C	L6000-Targetmol-Natural Compound Library-1680cpds	0.599684
CC(=O)O[C@H](CC(=O)O)C[N+](C)(C)C.[Cl-]	L6000-Targetmol-Natural Compound Library-1680cpds	0.398551
COc1ccc([C@@H]2CC(=O)c3c(O)cc(O)cc3O2)cc1O	L6000-Targetmol-Natural Compound Library-1680cpds	0.76931
CC(=O)Oc1cc(C)c(OC(C)=O)c2ccccc12	L6000-Targetmol-Natural Compound Library-1680cpds	0.40309
CC(C)[C@H](NC(=O)[C@H](CC(=O)O)NC(=O)[C@H](CCCCN)NC(=O)[C@@H](N)CCCNC(=N)N)C(=O)N[C@@H](Cc1ccc(O)cc1)C(=O)O	L6000-Targetmol-Natural Compound Library-1680cpds	0.37875
CC1(C)CC[C@]2(C(=O)O[C@@H]3O[C@H](CO[C@@H]4O[C@H](CO)[C@@H](O)[C@H](O)[C@H]4O)[C@@H](O)[C@H](O)[C@H]3O)CC[C@]3(C)C(=CC[C@@H]4[C@@]5(C)CC[C@H](O[C@@H]6OC[C@H](O)[C@H](O)[C@H]6O)[C@@](C)(CO)[C@@H]5CC[C@]43C)[C@@H]2C1	L6000-Targetmol-Natural Compound Library-1680cpds	0.698085
O.O.O.O.OC[C@H]1O[C@@](CO)(O[C@H]2O[C@H](CO[C@H]3O[C@H](CO[C@H]4O[C@H](CO)[C@H](O)[C@H](O)[C@H]4O)[C@H](O)[C@H](O)[C@H]3O)[C@@H](O)[C@H](O)[C@H]2O)[C@@H](O)[C@@H]1O	L6000-Targetmol-Natural Compound Library-1680cpds	0.417773
COc1cc2c(cc1OC)C1Cc3ccc(OC)c(OC)c3CN1CC2	L6000-Targetmol-Natural Compound Library-1680cpds	0.428389
C[C@@H]1O[C@H]2O[C@H]3[C@@H](OC[C@H](O)[C@@H]3O)OC(=O)[C@]34CCC(C)(C)C[C@H]3C3=CC[C@@H]5[C@@]6(C)C[C@H](O)[C@H](O[C@@H]7O[C@H](CO)[C@@H](O)[C@H](O)[C@H]7O[C@@H]7OC[C@H](OC(=O)C[C@](C)(O)CC(=O)O[C@@H]1[C@@H](O[C@@H]1OC[C@@H](O)[C@H](O)[C@H]1O)[C@H]2O)[C@H](O)[C@H]7O)[C@@](C)(CO)[C@@H]6CC[C@@]5(C)[C@]3(C)CC4	L6000-Targetmol-Natural Compound Library-1680cpds	0.661623
OC[C@H]1O[C@@H](OCCc2ccc(O)cc2)[C@H](O)[C@@H](O)[C@@H]1O	L6000-Targetmol-Natural Compound Library-1680cpds	0.424949
COc1cc2c(cc1OC)-c1cc3ccc(OC)c(OC)c3c[n+]1CC2.[Cl-]	L6000-Targetmol-Natural Compound Library-1680cpds	0.504916
O=C(O)CCC(=O)O	L6000-Targetmol-Natural Compound Library-1680cpds	0.53125
Cc1nc(C)c(C)nc1C	L6000-Targetmol-Natural Compound Library-1680cpds	0.371542
CC1=CC(=O)CC(C)(C)C1=O	L6000-Targetmol-Natural Compound Library-1680cpds	0.474747
C=C1CC[C@H]2O[C@]2(C)CC[C@@H]2[C@@H]1CC2(C)C	L6000-Targetmol-Natural Compound Library-1680cpds	0.581152
Br.CN1[C@H]2C[C@H](OC(=O)[C@H](CO)c3ccccc3)C[C@@H]1[C@H]1O[C@@H]21	L6000-Targetmol-Natural Compound Library-1680cpds	0.399485
COC1=C[C@@H]2[C@@H]3Cc4ccc(OC)c(O)c4[C@]2(CCN3C)CC1=O	L6000-Targetmol-Natural Compound Library-1680cpds	0.569422
O=C(/C=C/c1ccc(O)c2c1[C@H](C(=O)O[C@H](Cc1ccc(O)c(O)c1)C(=O)O)[C@@H](c1ccc(O)c(O)c1)O2)O[C@H](Cc1ccc(O)c(O)c1)C(=O)O	L6000-Targetmol-Natural Compound Library-1680cpds	0.578863
CC1(C)O[C@H]2CC(=O)OC[C@@]23[C@H]1CC(=O)[C@]1(C)[C@@H]3CC[C@@]2(C)[C@H](c3ccoc3)OC(=O)[C@H]3O[C@]321	L6000-Targetmol-Natural Compound Library-1680cpds	0.527211
COc1cc2ccc(=O)oc2cc1OC	L6000-Targetmol-Natural Compound Library-1680cpds	0.4081
CC(=O)O.Cc1cc2c(C(C)C)c(O)c(O)c(C=O)c2c(O)c1-c1c(C)cc2c(C(C)C)c(O)c(O)c(C=O)c2c1O	L6000-Targetmol-Natural Compound Library-1680cpds	0.407047
CC(=O)c1c(O)c(C)c(O)c2c1OC1=CC(=O)C(C(C)=O)C(=O)C12C	L6000-Targetmol-Natural Compound Library-1680cpds	0.572113
O=C(O[C@@H]1Cc2c(O)cc(O)cc2O[C@@H]1c1ccc(O)c(O)c1)c1cc(O)c(O)c(O)c1	L6000-Targetmol-Natural Compound Library-1680cpds	0.558506
C[C@H]1CC[C@@]2(OC1)O[C@H]1C[C@H]3[C@@H]4CC[C@@H]5C[C@@H](O)CC[C@]5(C)[C@H]4CC[C@]3(C)C1[C@@H]2C	L6000-Targetmol-Natural Compound Library-1680cpds	0.422601
CC(=O)c1ccc(O)c(C(=O)O)c1	L6000-Targetmol-Natural Compound Library-1680cpds	0.4256
O=C([O-])C1C(C(=O)[O-])[C@H]2CC[C@@H]1O2.[Na+].[Na+]	L6000-Targetmol-Natural Compound Library-1680cpds	0.463987
COc1ccc([C@@H]2CC(=O)c3c(O)cc(O[C@@H]4O[C@H](CO)[C@@H](O)[C@H](O)[C@H]4O[C@@H]4O[C@@H](C)[C@H](O)[C@@H](O)[C@H]4O)cc3O2)cc1O	L6000-Targetmol-Natural Compound Library-1680cpds	0.633282
C=C1CC[C@H]2[C@@](C)(CC[C@@H](O)[C@@]2(C)CO)[C@@H]1C/C=C1\C(=O)OC=C1O	L6000-Targetmol-Natural Compound Library-1680cpds	0.575856
O=C(O)C1=C[C@@H](O)[C@@H](O)[C@H](O)C1	L6000-Targetmol-Natural Compound Library-1680cpds	0.355593
O=C(O)/C=C/c1ccccc1	L6000-Targetmol-Natural Compound Library-1680cpds	0.414938
CC1(C)[C@@H](O[C@H]2O[C@H](C(=O)O)[C@@H](O)[C@H](O)[C@H]2OC2O[C@H](C(=O)O)[C@@H](O)[C@H](O)[C@H]2O)CC[C@@]2(C)[C@H]1CC[C@]1(C)[C@@H]2C(=O)C=C2[C@@H]3C[C@@](C)(C(=O)O)CC[C@]3(C)CC[C@]21C	L6000-Targetmol-Natural Compound Library-1680cpds	0.604054
COC(=O)CC[C@@H](C)[C@H]1CC[C@H]2C3[C@H](C[C@H](O)[C@@]21C)[C@@]1(C)CC[C@@H](O)C[C@H]1C[C@H]3O	L6000-Targetmol-Natural Compound Library-1680cpds	0.522099
CC1(C)[C@@H](O)CC[C@@]2(C)[C@H]1CC[C@]1(C)[C@@H]2C(=O)C=C2[C@H]3C[C@@](C)(C(=O)O)CC[C@]3(C)CC[C@]21C	L6000-Targetmol-Natural Compound Library-1680cpds	0.653137
C[C@]12CC[C@H]3[C@@H](CCC4=CC(=O)CC[C@@]43C)[C@@H]1CC[C@]2(O)C(=O)CO	L6000-Targetmol-Natural Compound Library-1680cpds	0.583618
C[C@@H]1C(=O)O[C@H]2C[C@@]34[C@H]5C[C@@H](C(C)(C)C)C36[C@@H](OC(=O)[C@@H]6O)O[C@@]4(C(=O)O5)[C@]21O	L6000-Targetmol-Natural Compound Library-1680cpds	0.530135
C[C@@H]1C(=O)O[C@H]2[C@H](O)C34[C@@H]5OC(=O)[C@]3(O[C@@H]3OC(=O)[C@H](O)C34[C@H](C(C)(C)C)[C@H]5O)[C@@]12O	L6000-Targetmol-Natural Compound Library-1680cpds	0.530713
C[C@@H]1C(=O)O[C@H]2[C@@H](O)C34[C@H]5C[C@@H](C(C)(C)C)C36[C@@H](OC(=O)[C@@H]6O)O[C@@]4(C(=O)O5)[C@@]12O	L6000-Targetmol-Natural Compound Library-1680cpds	0.529484
Nc1ncnc2c1ncn2[C@H]1C[C@H](O)[C@@H](CO)O1.O	L6000-Targetmol-Natural Compound Library-1680cpds	0.495413
O=C1CCC[C@@H]2[C@H]3CCC[N+]4([O-])CCC[C@@H](CN12)[C@@H]34	L6000-Targetmol-Natural Compound Library-1680cpds	0.455497
C[C@@H]1O[C@@H](O[C@H]2[C@H](Oc3cc(O)c4c(=O)cc(-c5ccc(O)cc5)oc4c3)O[C@H](CO)[C@@H](O)[C@@H]2O)[C@H](O)[C@H](O)[C@H]1O	L6000-Targetmol-Natural Compound Library-1680cpds	0.48818
C=C[C@H]1[C@@H](O[C@@H]2O[C@H](CO)[C@@H](O)[C@H](O)[C@H]2O)OC=C2C(=O)OCC[C@]21O	L6000-Targetmol-Natural Compound Library-1680cpds	0.491505
C[C@@H]1O[C@@H](Oc2c(-c3cc(O)c(O)c(O)c3)oc3cc(O)cc(O)c3c2=O)[C@H](O)[C@H](O)[C@H]1O	L6000-Targetmol-Natural Compound Library-1680cpds	0.537594
C[C@@H]1[C@H]2C3=CC[C@@H]4[C@@]5(C)C[C@@H](O)[C@H](O)[C@@](C)(CO)C5[C@H](O)C[C@@]4(C)[C@]3(C)CC[C@@]2(C(=O)O)CC[C@H]1C	L6000-Targetmol-Natural Compound Library-1680cpds	0.773946
COC(=O)C1=CO[C@@H](O[C@@H]2O[C@H](CO)[C@@H](O)[C@H](O)[C@H]2O)C2[C@@H]1C[C@H](O)[C@@H]2C	L6000-Targetmol-Natural Compound Library-1680cpds	0.526992
N[C@@H](Cc1cc(I)c(O)c(I)c1)C(=O)O.O.O	L6000-Targetmol-Natural Compound Library-1680cpds	0.367105
C[C@@H]1O[C@@H](O[C@H]2[C@H](Oc3cc(O)c(C(=O)CCc4ccc(O)cc4)c(O)c3)O[C@H](CO)[C@@H](O)[C@@H]2O)[C@H](O)[C@H](O)[C@H]1O	L6000-Targetmol-Natural Compound Library-1680cpds	0.457627
C[C@H]1O[C@H](O[C@@H]2[C@@H](O)[C@@H](O)[C@H](O)[C@H](O)[C@H]2O)[C@@H](N)C[C@@H]1NC(=N)C(=O)O.Cl	L6000-Targetmol-Natural Compound Library-1680cpds	0.369759
CC1(C)CCC[C@](C)(C2CC[C@]3(C)C2[C@H](O)C[C@@H]2[C@@]4(C)CC[C@H](O)C(C)(C)[C@@H]4CC[C@]23C)O1	L6000-Targetmol-Natural Compound Library-1680cpds	0.569588
CC[C@@]1(O)C(=O)OCc2c1cc1n(c2=O)Cc2cc3cc(O)ccc3nc2-1	L6000-Targetmol-Natural Compound Library-1680cpds	0.642599
O=C(/C=C/c1ccc(O)c(O)c1)O[C@H](Cc1ccc(O)c(O)c1)C(=O)O	L6000-Targetmol-Natural Compound Library-1680cpds	0.479112
COc1ccc(C[C@H]2COC(=O)[C@@H]2Cc2ccc(O[C@@H]3O[C@H](CO)[C@@H](O)[C@H](O)[C@H]3O)c(OC)c2)cc1OC	L6000-Targetmol-Natural Compound Library-1680cpds	0.45
COc1ccc(CCC(=O)c2c(O)cc(O[C@@H]3O[C@H](CO)[C@@H](O)[C@H](O)[C@H]3O[C@@H]3O[C@@H](C)[C@H](O)[C@@H](O)[C@H]3O)cc2O)cc1O	L6000-Targetmol-Natural Compound Library-1680cpds	0.476419
C[C@H]1O[C@@H](O[C@H]2CC[C@@]3(C)[C@@H](CC[C@]4(C)[C@@H]3C=C[C@]35OC[C@@]6(CCC(C)(C)C[C@H]63)[C@@H](O)C[C@]54C)[C@]2(C)CO)[C@H](O)[C@@H](O[C@@H]2O[C@H](CO)[C@@H](O)[C@H](O)[C@H]2O)[C@H]1O	L6000-Targetmol-Natural Compound Library-1680cpds	0.538889
C=C[C@@H]1C2=CCOC(=O)C2=CO[C@H]1O[C@@H]1O[C@H](CO)[C@@H](O)[C@H](O)[C@H]1O	L6000-Targetmol-Natural Compound Library-1680cpds	0.452153
Cc1cc(O)cc(O[C@@H]2O[C@H](CO)[C@@H](O)[C@H](O)[C@H]2O)c1	L6000-Targetmol-Natural Compound Library-1680cpds	0.380132
C=CCSC[C@H](N)C(=O)O	L6000-Targetmol-Natural Compound Library-1680cpds	0.362903
CC[C@]12C=CCN3CC[C@@]4(c5ccc(OC)cc5N(C)[C@H]4[C@@](O)(C(=O)OC)[C@@H]1OC(C)=O)[C@@H]32	L6000-Targetmol-Natural Compound Library-1680cpds	0.704859
Cl.O[C@H]1C=C2CCN3Cc4cc5c(cc4[C@H]([C@@H]1O)[C@@H]23)OCO5	L6000-Targetmol-Natural Compound Library-1680cpds	0.5629
O=C(O)[C@H]1O[C@@H](Oc2cc3oc(-c4ccccc4)cc(=O)c3c(O)c2O)[C@H](O)[C@@H](O)[C@@H]1O	L6000-Targetmol-Natural Compound Library-1680cpds	0.515118
CC(C)=CCC[C@](C)(O[C@@H]1O[C@H](CO)[C@@H](O)[C@H](O)[C@H]1O)C1CC[C@]2(C)C1[C@H](O)C[C@@H]1[C@@]3(C)CC[C@H](O)C(C)(C)[C@@H]3[C@@H](O[C@@H]3O[C@H](CO)[C@@H](O)[C@H](O)[C@H]3O)C[C@]12C	L6000-Targetmol-Natural Compound Library-1680cpds	0.543446
O.Oc1cc(O)c2c(c1)O[C@H](c1ccc(O)c(O)c1)[C@@H](O)C2	L6000-Targetmol-Natural Compound Library-1680cpds	0.581285
OC[C@H]1O[C@@H](O[C@@H]2OC=C[C@@H]3C2[C@@]2(CO)O[C@H]2[C@H]3O)[C@H](O)[C@@H](O)[C@@H]1O	L6000-Targetmol-Natural Compound Library-1680cpds	0.467089
C[n+]1cc2c3c(ccc2c2ccc4cc5c(cc4c21)OCO5)OCO3	L6000-Targetmol-Natural Compound Library-1680cpds	0.521693
CCCCC[C@H]1C(=O)CC[C@@H]1CC(=O)OC	L6000-Targetmol-Natural Compound Library-1680cpds	0.408854
CCOC(=O)c1c(C)cc(O)cc1O	L6000-Targetmol-Natural Compound Library-1680cpds	0.422849
COc1ccc2c(C)cc(=O)oc2c1	L6000-Targetmol-Natural Compound Library-1680cpds	0.433647
O=C1C=CC[C@@H]2[C@H]3CCC[N@@+]4([O-])CCC[C@@H](CN12)[C@@H]34	L6000-Targetmol-Natural Compound Library-1680cpds	0.507216
O=C(/C=C/c1ccccc1)O[C@@H]1[C@@H]2O[C@]2(CO)C2[C@H](O[C@@H]3O[C@H](CO)[C@@H](O)[C@H](O)[C@H]3O)OC=C[C@H]21	L6000-Targetmol-Natural Compound Library-1680cpds	0.506603
CC(=O)O[C@H]1C(=O)[C@@]2(C)C([C@H](OC(=O)c3ccccc3)[C@]3(O)C[C@H](O)C(C)=C1C3(C)C)[C@]1(OC(C)=O)CO[C@@H]1C[C@@H]2O	L6000-Targetmol-Natural Compound Library-1680cpds	0.55
O=C(O)[C@H]1O[C@@H](Oc2cc3oc(-c4ccc(O)cc4)cc(=O)c3c(O)c2O)[C@H](O)[C@@H](O)[C@@H]1O	L6000-Targetmol-Natural Compound Library-1680cpds	0.51921
C=C1C(=O)[C@@]23[C@@H](CC[C@@H]1[C@H]2O)[C@@]12CO[C@]3(O)[C@@H](O)[C@@H]1C(C)(C)CC[C@@H]2O	L6000-Targetmol-Natural Compound Library-1680cpds	0.54902
COc1ccc(-c2cc(=O)c3c(O)c(OC)c(O[C@@H]4O[C@H](CO[C@@H]5O[C@@H](C)[C@H](O)[C@@H](O)[C@H]5O)[C@@H](O)[C@H](O)[C@H]4O)cc3o2)cc1	L6000-Targetmol-Natural Compound Library-1680cpds	0.513058
N[C@@H](C=O)[C@@H](O)[C@H](O)[C@H](O)CO.O=S(=O)(O)O	L6000-Targetmol-Natural Compound Library-1680cpds	0.365957
C[C@@H]1O[C@@H](O[C@H]2C(=O)c3c(O)cc(O)cc3O[C@@H]2c2ccc(O)c(O)c2)[C@H](O)[C@H](O)[C@H]1O	L6000-Targetmol-Natural Compound Library-1680cpds	0.597122
N#C[C@H](O[C@@H]1O[C@H](CO[C@@H]2O[C@H](CO)[C@@H](O)[C@H](O)[C@H]2O)[C@@H](O)[C@H](O)[C@H]1O)c1ccccc1	L6000-Targetmol-Natural Compound Library-1680cpds	0.379534
COC1=C(OC)C(=O)C(C/C=C(\C)CC/C=C(\C)CC/C=C(\C)CC/C=C(\C)CC/C=C(\C)CC/C=C(\C)CC/C=C(\C)CC/C=C(\C)CC/C=C(\C)CCC=C(C)C)=C(C)C1=O	L6000-Targetmol-Natural Compound Library-1680cpds	0.461297
O=c1ccc2cc(O)c(O)cc2o1	L6000-Targetmol-Natural Compound Library-1680cpds	0.348643
CC(C)=CCC[C@](C)(O)C1CC[C@]2(C)C1[C@H](O)C[C@@H]1[C@@]3(C)CC[C@H](O)C(C)(C)[C@@H]3CC[C@]12C	L6000-Targetmol-Natural Compound Library-1680cpds	0.547368
CCNC(=O)CC[C@H](N)C(=O)O	L6000-Targetmol-Natural Compound Library-1680cpds	0.520325
COc1cccc2c1cc([N+](=O)[O-])c1c(C(=O)O)cc3c(c12)OCO3	L6000-Targetmol-Natural Compound Library-1680cpds	0.414182
C[C@H]1C(=O)O[C@@H]2CCN3CC=C(COC(=O)[C@](C)(O)[C@]1(C)O)[C@H]23	L6000-Targetmol-Natural Compound Library-1680cpds	0.480657
CC1(C)CCC[C@](C)([C@H]2CC[C@]3(C)C2[C@H](O)C[C@@H]2[C@@]4(C)CC[C@H](O)C(C)(C)[C@@H]4[C@H](O)C[C@]23C)O1	L6000-Targetmol-Natural Compound Library-1680cpds	0.569231
O=C(/C=C/c1ccc(O)c(O)c1)O[C@@H]1C[C@](O)(C(=O)O)C[C@@H](O)[C@H]1O	L6000-Targetmol-Natural Compound Library-1680cpds	0.497502
CCN1C[C@]2(OC(=O)c3ccccc3NC(C)=O)CC[C@H](OC)C34[C@@H]2C[C@@H]([C@@H]13)[C@@]1(O)C[C@H](OC)[C@H]2C[C@@H]4[C@]1(O)[C@H]2OC	L6000-Targetmol-Natural Compound Library-1680cpds	0.515913
O=C(O)/C=C/c1ccc(O)c(O)c1	L6000-Targetmol-Natural Compound Library-1680cpds	0.453297
CC(C)(C)[C@]1(O)C[C@@H]2OC(=O)C[C@@]23C(=O)O[C@@H]2OC(=O)[C@H](O)C231	L6000-Targetmol-Natural Compound Library-1680cpds	0.53534
COc1ccc2cc1Oc1ccc(cc1)C[C@H]1c3cc(c(OC)cc3CCN1C)Oc1c(O)c(OC)cc3c1[C@H](C2)N(C)CC3	L6000-Targetmol-Natural Compound Library-1680cpds	0.460449
CC(C)=CCC[C@](C)(O)C1CC[C@]2(C)C1[C@H](O)C[C@@H]1[C@@]3(C)CC[C@H](O)C(C)(C)[C@@H]3[C@@H](O)C[C@]12C	L6000-Targetmol-Natural Compound Library-1680cpds	0.54712
COc1ccc2c(c1)[nH]c1c(C)nccc12.Cl	L6000-Targetmol-Natural Compound Library-1680cpds	0.486111
Nc1ncnc2c1ncn2C1O[C@H](COP(=O)(O)OP(=O)([O-])OP(=O)([O-])O)[C@@H](O)[C@H]1O.O.[Na+].[Na+]	L6000-Targetmol-Natural Compound Library-1680cpds	0.526383
C[C@@H]1[C@H]2C3=CC[C@@H]4[C@@]5(C)C[C@@H](O)[C@H](O)[C@@](C)(CO)C5[C@H](O)C[C@@]4(C)[C@@]3(C)CC[C@@]2(C(=O)O[C@@H]2O[C@H](CO[C@@H]3O[C@H](CO)[C@@H](O[C@@H]4O[C@@H](C)[C@H](O)[C@@H](O)[C@H]4O)[C@H](O)[C@H]3O)[C@@H](O)[C@H](O)[C@H]2O)CC[C@H]1C	L6000-Targetmol-Natural Compound Library-1680cpds	0.679137
C[C@H]1COC2=C1C(=O)C(=O)c1c2ccc2c1CCCC2(C)C	L6000-Targetmol-Natural Compound Library-1680cpds	0.525378
O=c1c(-c2ccc(O)cc2)coc2c([C@@H]3O[C@H](CO)[C@@H](O)[C@H](O)[C@H]3O)c(O)ccc12	L6000-Targetmol-Natural Compound Library-1680cpds	0.561695
O=c1cc(-c2ccccc2)oc2c(O)c(O)ccc12	L6000-Targetmol-Natural Compound Library-1680cpds	0.379224
COc1cc(C(=O)O[C@@H]2[C@@H]3O[C@]3(CO)C3[C@H](O[C@@H]4O[C@H](CO)[C@@H](O)[C@H](O)[C@H]4O)OC=C[C@H]32)ccc1O	L6000-Targetmol-Natural Compound Library-1680cpds	0.498335
COC(=O)c1ccc(O)c(OC)c1	L6000-Targetmol-Natural Compound Library-1680cpds	0.544843
COc1cc2c(=O)c(-c3ccc(O)cc3)coc2cc1O[C@@H]1O[C@H](CO)[C@@H](O)[C@H](O)[C@H]1O	L6000-Targetmol-Natural Compound Library-1680cpds	0.471477
CCOC(=O)/C=C/c1ccc(O)c(OC)c1	L6000-Targetmol-Natural Compound Library-1680cpds	0.564334
CC(C)=CCC[C@](C)(O[C@@H]1O[C@H](CO[C@@H]2O[C@H](CO)[C@@H](O)[C@H](O)[C@H]2O)[C@@H](O)[C@H](O)[C@H]1O)C1CC[C@]2(C)C1[C@H](O)C[C@@H]1[C@@]3(C)CC[C@H](O[C@@H]4O[C@H](CO)[C@@H](O)[C@H](O)[C@H]4O[C@@H]4O[C@H](CO)[C@@H](O)[C@H](O)[C@H]4O)C(C)(C)[C@@H]3CC[C@]12C	L6000-Targetmol-Natural Compound Library-1680cpds	0.510791
CC(/C=C/C=C(\C)C(=O)O[C@@H]1O[C@H](CO[C@@H]2O[C@H](CO)[C@@H](O)[C@H](O)[C@H]2O)[C@@H](O)[C@H](O)[C@H]1O)=C\C=C\C=C(C)\C=C\C=C(/C)C(=O)O[C@@H]1O[C@H](CO[C@@H]2O[C@H](CO)[C@@H](O)[C@H](O)[C@H]2O)[C@@H](O)[C@H](O)[C@H]1O	L6000-Targetmol-Natural Compound Library-1680cpds	0.5
CC1=C2C[C@H]3[C@@H](CC=C4C[C@@H](O)CC[C@@]43C)[C@@H]2CC[C@]12O[C@@H]1C[C@H](C)CN[C@H]1[C@H]2C	L6000-Targetmol-Natural Compound Library-1680cpds	0.528662
COc1cc(OC)c(OC)cc1C=O	L6000-Targetmol-Natural Compound Library-1680cpds	0.415948
C[C@@H]1[C@H]2C3=CC[C@@H]4[C@@]5(C)C[C@@H](O)[C@H](O)[C@@](C)(CO)[C@@H]5CC[C@@]4(C)[C@]3(C)CC[C@@]2(C(=O)O)CC[C@H]1C	L6000-Targetmol-Natural Compound Library-1680cpds	0.793307
CCCCCCCCCCC(C(=O)O)C1(C(=O)O)CCC(=O)O1	L6000-Targetmol-Natural Compound Library-1680cpds	0.513473
C=C1C(=O)O[C@@H]2C[C@@]3(C)CCCC(=C)[C@@H]3C[C@H]12	L6000-Targetmol-Natural Compound Library-1680cpds	0.604491
C=C(C)[C@@H]1CC[C@]2(C(=O)O)CC[C@]3(C)[C@H](CC[C@@H]4[C@@]5(C)CC[C@H](O)C(C)(C)[C@@H]5CC[C@]43C)C12	L6000-Targetmol-Natural Compound Library-1680cpds	0.693151
C[C@H](CCC(=O)NCC(=O)O)[C@H]1CC[C@H]2C3[C@H](C[C@H](O)[C@@]21C)[C@@]1(C)CC[C@@H](O)C[C@H]1C[C@H]3O	L6000-Targetmol-Natural Compound Library-1680cpds	0.534351
C=C1C(=O)O[C@H]2[C@H]1CCC(=C)[C@@H]1CCC(=C)[C@H]21	L6000-Targetmol-Natural Compound Library-1680cpds	0.584158
COc1ccc(-c2cc(=O)c3c(OC)c(OC)c(OC)c(OC)c3o2)cc1OC	L6000-Targetmol-Natural Compound Library-1680cpds	0.469248
O=c1c(O)c(-c2ccc(O)cc2O)oc2cc(O)cc(O)c12	L6000-Targetmol-Natural Compound Library-1680cpds	0.408907
COc1cc(-c2oc3cc(O)cc(O)c3c(=O)c2O)ccc1O	L6000-Targetmol-Natural Compound Library-1680cpds	0.414352
O=c1cc(-c2ccccc2)oc2cc(O)cc(O)c12	L6000-Targetmol-Natural Compound Library-1680cpds	0.361345
O=C1C[C@@H](c2ccc(O)cc2)Oc2cc(O)cc(O)c21	L6000-Targetmol-Natural Compound Library-1680cpds	0.738347
Cc1cc(O)cc(O)c1C(=O)O	L6000-Targetmol-Natural Compound Library-1680cpds	0.383966
CC(=O)c1c(O)cc(O)cc1O	L6000-Targetmol-Natural Compound Library-1680cpds	0.494012
CC1=CC(=O)c2c(O)cccc2C1=O	L6000-Targetmol-Natural Compound Library-1680cpds	0.388075
COc1ccc(-c2cc(=O)c3c(OC)c(OC)c(OC)c(OC)c3o2)cc1	L6000-Targetmol-Natural Compound Library-1680cpds	0.450947
O=C1c2cccc(O)c2C(=O)c2c(O)cc(CO)cc21	L6000-Targetmol-Natural Compound Library-1680cpds	0.369408
O=c1c(O[C@@H]2O[C@H](CO)[C@H](O)[C@H](O)[C@H]2O)c(-c2ccc(O)c(O)c2)oc2cc(O)cc(O)c12	L6000-Targetmol-Natural Compound Library-1680cpds	0.538958
CC(C)=CCOc1c2occc2cc2ccc(=O)oc12	L6000-Targetmol-Natural Compound Library-1680cpds	0.487654
CC(C)=CCOc1c2ccoc2cc2oc(=O)ccc12	L6000-Targetmol-Natural Compound Library-1680cpds	0.478702
O=C1/C(=C2\Nc3ccccc3C2=O)Nc2ccccc21	L6000-Targetmol-Natural Compound Library-1680cpds	0.370206
COc1ccc2ccc(=O)oc2c1CC=C(C)C	L6000-Targetmol-Natural Compound Library-1680cpds	0.380228
Oc1cc(O)c2c(c1)OC(c1ccc(O)c(O)c1)C(OC1(c3ccc(O)c(O)c3)Oc3cc(O)cc(O)c3C(O)C1O)C2	L6000-Targetmol-Natural Compound Library-1680cpds	0.55035
CN1CCc2cc3c(cc2C1[C@@H]1OC(=O)c2c1ccc1c2OCO1)OCO3	L6000-Targetmol-Natural Compound Library-1680cpds	0.558302
O=c1ccc2ccc(O)c(O)c2o1	L6000-Targetmol-Natural Compound Library-1680cpds	0.375128
COc1cc(OC)c2ccc(=O)oc2c1	L6000-Targetmol-Natural Compound Library-1680cpds	0.40185
C=C1C[C@@]2(O)O[C@@]3(C[C@H]2C(C)C)[C@@H](C)CC[C@@H]13	L6000-Targetmol-Natural Compound Library-1680cpds	0.495425
COc1ccc([C@@H]2OC[C@@H]3[C@@H](c4ccc(O[C@@H]5O[C@H](CO)[C@@H](O)[C@H](O)[C@H]5O)c(OC)c4)OC[C@H]23)cc1OC	L6000-Targetmol-Natural Compound Library-1680cpds	0.467569
COc1ccc(-c2oc3c(CC=C(C)C)c(O[C@@H]4O[C@H](CO)[C@@H](O)[C@H](O)[C@H]4O)cc(O)c3c(=O)c2O[C@@H]2O[C@@H](C)[C@H](O)[C@@H](O)[C@H]2O)cc1	L6000-Targetmol-Natural Compound Library-1680cpds	0.615465
Oc1cc(O)c2c(c1)O[C@H](c1ccc(O)c(O)c1)[C@H](O)C2	L6000-Targetmol-Natural Compound Library-1680cpds	0.581285
O=C(O)c1cc(O)ccc1O	L6000-Targetmol-Natural Compound Library-1680cpds	0.446429
O=c1cc(-c2ccccc2)oc2cc(O)c(O)c(O)c12	L6000-Targetmol-Natural Compound Library-1680cpds	0.381793
COc1ccc(-c2coc3cc(O)cc(O)c3c2=O)cc1	L6000-Targetmol-Natural Compound Library-1680cpds	0.386076
COc1cc(CO)ccc1O	L6000-Targetmol-Natural Compound Library-1680cpds	0.470588
OCCc1ccc(O)cc1	L6000-Targetmol-Natural Compound Library-1680cpds	0.44843
O=C(O)CCc1ccc(O)cc1	L6000-Targetmol-Natural Compound Library-1680cpds	0.513393
O=C(O)/C=C/c1ccc(O)cc1	L6000-Targetmol-Natural Compound Library-1680cpds	0.510373
CC1(C)CC[C@]2(C(=O)O)CC[C@]3(C)C(=CC[C@@H]4[C@@]5(C)CC[C@H](O)C(C)(C)[C@@H]5CC[C@]43C)[C@@H]2C1	L6000-Targetmol-Natural Compound Library-1680cpds	0.808421
CC1(C)CC[C@@]2(C(=O)O)[C@@H](C1)C1=CC[C@@H]3[C@@]4(C)CC[C@H](O)C(C)(C)[C@@H]4CC[C@@]3(C)[C@]1(C)C[C@H]2O	L6000-Targetmol-Natural Compound Library-1680cpds	0.782524
C[C@H]1CC[C@]2(OC1)O[C@H]1C[C@H]3[C@@H]4CC=C5C[C@@H](O)CC[C@]5(C)[C@H]4CC[C@]3(C)C1[C@@H]2C	L6000-Targetmol-Natural Compound Library-1680cpds	0.574132
CN1c2ccccc2C(=O)N2CCc3c([nH]c4ccccc34)[C@H]21	L6000-Targetmol-Natural Compound Library-1680cpds	0.602019
Cc1cc(O)c2c(c1)C(=O)c1cc(O)cc(O)c1C2=O	L6000-Targetmol-Natural Compound Library-1680cpds	0.502538
O=C1CCC[C@@H]2[C@H]3CCCN4CCC[C@@H](CN12)[C@@H]34	L6000-Targetmol-Natural Compound Library-1680cpds	0.367238
C[C@@H]1O[C@@H](Oc2c(-c3ccc(O)c(O)c3)oc3cc(O)cc(O)c3c2=O)[C@H](O)[C@H](O)[C@H]1O	L6000-Targetmol-Natural Compound Library-1680cpds	0.536022
CC(C)=CCC[C@](C)(O[C@@H]1O[C@H](CO)[C@@H](O)[C@H](O)[C@H]1O)C1CC[C@]2(C)C1[C@H](O)C[C@@H]1[C@@]3(C)CC[C@H](O)C(C)(C)[C@@H]3[C@@H](O[C@@H]3O[C@H](CO)[C@@H](O)[C@H](O)[C@H]3O[C@@H]3O[C@@H](C)[C@H](O)[C@@H](O)[C@H]3O)C[C@]12C	L6000-Targetmol-Natural Compound Library-1680cpds	0.505051
CC(C)=CCC[C@](C)(O)C1CC[C@]2(C)C1[C@H](O)C[C@@H]1[C@@]3(C)CC[C@H](O)C(C)(C)[C@@H]3[C@@H](O[C@@H]3O[C@H](CO)[C@@H](O)[C@H](O)[C@H]3O[C@@H]3O[C@@H](C)[C@H](O)[C@@H](O)[C@H]3O)C[C@]12C	L6000-Targetmol-Natural Compound Library-1680cpds	0.536337
COc1ccc2c(c1OC)CN1CCc3cc4c(cc3C1C2)OCO4	L6000-Targetmol-Natural Compound Library-1680cpds	0.437738
O=c1ccc2ccc3occc3c2o1	L6000-Targetmol-Natural Compound Library-1680cpds	0.310488
O=c1cc(-c2ccccc2)oc2ccccc12	L6000-Targetmol-Natural Compound Library-1680cpds	0.447964
O=C(O)[C@@H](O)[C@H](O)[C@H](O)[C@@H](O)C(=O)O	L6000-Targetmol-Natural Compound Library-1680cpds	0.317829
CC(C)=CCC[C@](C)(O[C@@H]1O[C@H](CO)[C@@H](O)[C@H](O)[C@H]1O)C1CC[C@]2(C)C1[C@H](O)C[C@@H]1[C@@]3(C)CC[C@H](O[C@@H]4O[C@H](CO)[C@@H](O)[C@H](O)[C@H]4O[C@@H]4O[C@H](CO)[C@@H](O)[C@H](O)[C@H]4O)C(C)(C)[C@@H]3CC[C@]12C	L6000-Targetmol-Natural Compound Library-1680cpds	0.511527
O=c1c(O)c(-c2ccc(O)c(O)c2)oc2cc(O)ccc12	L6000-Targetmol-Natural Compound Library-1680cpds	0.396158
OC[C@H]1O[C@@H](O[C@@H]2[C@@H](CO)OC(O)[C@H](O)[C@H]2O)[C@H](O)[C@@H](O)[C@@H]1O	L6000-Targetmol-Natural Compound Library-1680cpds	0.331928
CC(C)(O)CC[C@@H](O)[C@](C)(O)C1CC[C@@]2(O)C3=CC(=O)[C@@H]4C[C@@H](O)[C@@H](O)C[C@]4(C)[C@H]3CC[C@]12C	L6000-Targetmol-Natural Compound Library-1680cpds	0.571646
O=c1c(-c2ccc(O)cc2)coc2cc(O[C@@H]3O[C@H](CO)[C@@H](O)[C@H](O)[C@H]3O)cc(O)c12	L6000-Targetmol-Natural Compound Library-1680cpds	0.462747
COc1cc(C(=O)O)cc(OC)c1O	L6000-Targetmol-Natural Compound Library-1680cpds	0.547278
C[C@]12CC(=O)[C@H]3[C@@H](CCC4=CC(=O)CC[C@@]43C)[C@@H]1CC[C@]2(O)C(=O)CO	L6000-Targetmol-Natural Compound Library-1680cpds	0.589577
O=c1ccc2cc(O[C@@H]3O[C@H](CO)[C@@H](O)[C@H](O)[C@H]3O)c(O)cc2o1	L6000-Targetmol-Natural Compound Library-1680cpds	0.419856
O=C(O)CCCCCCC[C@@H](O)[C@@H](O)CCCCCCO	L6000-Targetmol-Natural Compound Library-1680cpds	0.488
C[n+]1cccc(C(=O)[O-])c1	L6000-Targetmol-Natural Compound Library-1680cpds	0.42511
COc1cc(/C=C/c2ccc(O)cc2)cc(OC)c1	L6000-Targetmol-Natural Compound Library-1680cpds	0.446746
COc1ccc(/C=C/C(=O)O)cc1O	L6000-Targetmol-Natural Compound Library-1680cpds	0.494357
CN(C)CCc1ccc(O)cc1	L6000-Targetmol-Natural Compound Library-1680cpds	0.544186
CC1CCCCCCCCCCCCC(=O)C1	L6000-Targetmol-Natural Compound Library-1680cpds	0.398438
O=C1OC(=O)C2C3CCC(O3)C12	L6000-Targetmol-Natural Compound Library-1680cpds	0.532573
C=C(C)[C@@H]1CC[C@]2(C)CC[C@]3(C)[C@H](CC[C@@H]4[C@@]5(C)CC[C@H](O)C(C)(C)[C@@H]5CC[C@]43C)C12	L6000-Targetmol-Natural Compound Library-1680cpds	0.558659
C=C1C(=O)O[C@@H]2C[C@@]3(C)CCC[C@H](C)C3=C[C@H]12	L6000-Targetmol-Natural Compound Library-1680cpds	0.625199
C=C1CC[C@H]2[C@@](C)(CC[C@@H](O)[C@@]2(C)CO)[C@@H]1C/C=C1/C(=O)OC[C@H]1O	L6000-Targetmol-Natural Compound Library-1680cpds	0.603041
O=C1C[C@@H](c2ccc(O[C@@H]3O[C@H](CO)[C@@H](O)[C@H](O)[C@H]3O)cc2)Oc2cc(O)ccc21	L6000-Targetmol-Natural Compound Library-1680cpds	0.627234
COc1ccc(C(C)=O)c(O)c1	L6000-Targetmol-Natural Compound Library-1680cpds	0.556355
O=c1c(-c2ccc(O)cc2)coc2cc(O[C@@H]3O[C@H](CO)[C@@H](O)[C@H](O)[C@H]3O)ccc12	L6000-Targetmol-Natural Compound Library-1680cpds	0.434932
C=C1C(=O)O[C@@H]2/C=C(\C)CC/C=C(\C)CC[C@@H]12	L6000-Targetmol-Natural Compound Library-1680cpds	0.533871
CC1(C)CCC[C@@]2(C)[C@H]1CC[C@@]1(C)OC(=O)C[C@H]21	L6000-Targetmol-Natural Compound Library-1680cpds	0.517495
CC(C)CCC[C@@H](C)[C@H]1CC[C@H]2[C@@H]3CC[C@H]4CC(=O)CC[C@]4(C)[C@H]3CC[C@@]21C	L6000-Targetmol-Natural Compound Library-1680cpds	0.443515
Cc1coc2c1C(=O)C(=O)c1c-2ccc2c1CCCC2(C)C	L6000-Targetmol-Natural Compound Library-1680cpds	0.528004
Cc1coc2c1C(=O)C(=O)c1c-2ccc2c(C)cccc12	L6000-Targetmol-Natural Compound Library-1680cpds	0.483172
CCCCCCCCCCCCCCCC(=O)O	L6000-Targetmol-Natural Compound Library-1680cpds	0.36
COc1cc2ccc(=O)oc2c(O)c1O	L6000-Targetmol-Natural Compound Library-1680cpds	0.459854
O=c1c(O)c(-c2ccccc2)oc2ccccc12	L6000-Targetmol-Natural Compound Library-1680cpds	0.371069
C=C1C[C@@]23CC[C@H]4[C@@](C)(CCC[C@@]4(C)C(=O)O[C@@H]4O[C@H](CO)[C@@H](O)[C@H](O)[C@H]4O)[C@@H]2CC[C@]1(O[C@@H]1O[C@H](CO)[C@@H](O)[C@H](O)[C@H]1O[C@@H]1O[C@H](CO)[C@@H](O)[C@H](O)[C@H]1O)C3	L6000-Targetmol-Natural Compound Library-1680cpds	0.564987
CC(C)[C@@H](C)/C=C/[C@@H](C)[C@H]1CC[C@H]2C3=CC=C4C[C@@H](O)CC[C@]4(C)[C@H]3CC[C@@]21C	L6000-Targetmol-Natural Compound Library-1680cpds	0.514815
COc1cc2c(c(OC)c1OC)-c1c(cc3c(c1OC)OCO3)C[C@H](C)[C@](C)(O)[C@H]2OC(=O)c1ccccc1	L6000-Targetmol-Natural Compound Library-1680cpds	0.551724
OC[C@H]1O[C@H](OC[C@H]2OC(O)[C@H](O)[C@@H](O)[C@@H]2O)[C@H](O)[C@@H](O)[C@H]1O	L6000-Targetmol-Natural Compound Library-1680cpds	0.320774
CC1(C)CC[C@]2(C(=O)O)CC[C@]3(C)[C@H](C(=O)C=C4[C@@]3(C)CC[C@H]3C(C)(C)C(=O)C(C#N)=C[C@]43C)[C@@H]2C1	L6000-Targetmol-Natural Compound Library-1680cpds	0.564885
C[C@H]1CC[C@@]2(O)C(C)(C)[C@@H]3CC[C@@]2(C)[C@H]1C3	L6000-Targetmol-Natural Compound Library-1680cpds	0.428969
COc1cc2c(cc1OC)C1Cc3ccc(OC)c(OC)c3CN1CC2.Cl	L6000-Targetmol-Natural Compound Library-1680cpds	0.428389
CC(=O)O[C@H]1CC[C@@]2(C)C(=CC[C@@H]3[C@@H]2CC[C@@]2(C)[C@H]3CC[C@@H]2[C@H](C)CCCC(C)C)C1	L6000-Targetmol-Natural Compound Library-1680cpds	0.619403
c1cc2c(cc1[C@H]1OC[C@@H]3[C@@H](c4ccc5c(c4)OCO5)OC[C@H]13)OCO2	L6000-Targetmol-Natural Compound Library-1680cpds	0.396907
COc1cc2c3cc1Oc1c(OC)c(OC)cc4c1[C@@H](Cc1ccc(O)c(c1)Oc1ccc(cc1)C[C@@H]3N(C)CC2)N(C)CC4.Cl.Cl	L6000-Targetmol-Natural Compound Library-1680cpds	0.467295
COC1=C[C@@H]2[C@@H]3Cc4ccc(OC)c(O)c4[C@]2(CCN3C)CC1=O.Cl	L6000-Targetmol-Natural Compound Library-1680cpds	0.569422
O=C(CCc1ccc(O)cc1)c1c(O)cc(O)cc1O[C@@H]1O[C@H](CO)[C@@H](O)[C@H](O)[C@H]1O	L6000-Targetmol-Natural Compound Library-1680cpds	0.472653
O=C(CCc1ccc(O)cc1)c1c(O)cc(O)cc1O	L6000-Targetmol-Natural Compound Library-1680cpds	0.449775
COc1cc2c(c(OC)c1OC)-c1c(cc3c(c1OC)OCO3)C[C@@H](C)[C@@H](C)C2	L6000-Targetmol-Natural Compound Library-1680cpds	0.428571
COc1cc2c(c(OC)c1OC)-c1c(cc(OC)c(OC)c1OC)C[C@@H](C)[C@@H](C)C2	L6000-Targetmol-Natural Compound Library-1680cpds	0.425743
C[n+]1cccc(C(=O)O)c1.[Cl-]	L6000-Targetmol-Natural Compound Library-1680cpds	0.42511
C[C@@H]1O[C@@H](O)[C@H](O)[C@H](O)[C@H]1O.O	L6000-Targetmol-Natural Compound Library-1680cpds	0.463183
CCOC(=O)c1ccc(O)c(OC)c1	L6000-Targetmol-Natural Compound Library-1680cpds	0.396694
NC(=O)NCCCC(N)C(=O)O	L6000-Targetmol-Natural Compound Library-1680cpds	0.449393
CC(C)=CCC[C@](C)(O)C1CC[C@]2(C)C1[C@H](O)C[C@@H]1[C@@]3(C)CC[C@H](O)C(C)(C)[C@@H]3[C@@H](O[C@@H]3O[C@H](CO)[C@@H](O)[C@H](O)[C@H]3O)C[C@]12C	L6000-Targetmol-Natural Compound Library-1680cpds	0.537202
COc1c(O)cc(O)c2c(=O)cc(-c3ccccc3)oc12	L6000-Targetmol-Natural Compound Library-1680cpds	0.413793
C=CC1=C(C)/C(=C/c2[nH]c(Cc3[nH]c(/C=C4/NC(=O)C(C)=C4C=C)c(C)c3CCC(=O)O)c(CCC(=O)O)c2C)NC1=O	L6000-Targetmol-Natural Compound Library-1680cpds	0.497256
NCCc1ccccc1	L6000-Targetmol-Natural Compound Library-1680cpds	0.491935
COc1cc(O)cc(OC)c1OC	L6000-Targetmol-Natural Compound Library-1680cpds	0.515284
COc1cc([C@@H]2c3cc4c(cc3[C@@H](O)[C@H]3COC(=O)[C@H]23)OCO4)cc(OC)c1O	L6000-Targetmol-Natural Compound Library-1680cpds	0.483296
OC[C@H]1O[C@@H](Oc2cc(O)cc(/C=C/c3ccc(O)cc3)c2)[C@H](O)[C@@H](O)[C@@H]1O	L6000-Targetmol-Natural Compound Library-1680cpds	0.38403
C=C[C@@]1(C)CC(=O)[C@@]2(O)[C@](C)(O1)[C@@H](OC(C)=O)[C@@H](O)[C@H]1C(C)(C)CC[C@H](O)[C@@]12C	L6000-Targetmol-Natural Compound Library-1680cpds	0.547493
O=c1cc(-c2ccccc2)oc2ccc(O)cc12	L6000-Targetmol-Natural Compound Library-1680cpds	0.485263
Cl.N[C@H]1C(O)O[C@H](CO)[C@@H](O)[C@@H]1O	L6000-Targetmol-Natural Compound Library-1680cpds	0.359294
O=c1ccc2cc3ccoc3cc2o1	L6000-Targetmol-Natural Compound Library-1680cpds	0.492986
O=Cc1ccc(CO)o1	L6000-Targetmol-Natural Compound Library-1680cpds	0.482213
O=C([O-])C(O)Cc1ccc(O)c(O)c1.[Na+]	L6000-Targetmol-Natural Compound Library-1680cpds	0.493369
CC(C)=C1C/C=C(\C)CC/C=C(\C)CC1=O	L6000-Targetmol-Natural Compound Library-1680cpds	0.402198
Cc1c(S(=O)(=O)[O-])oc2c1C(=O)C(=O)c1c-2ccc2c1CCCC2(C)C.[Na+]	L6000-Targetmol-Natural Compound Library-1680cpds	0.610294
OCc1c[nH]c2ccccc12	L6000-Targetmol-Natural Compound Library-1680cpds	0.54902
CCOc1cc(C=O)ccc1OC(C)=O	L6000-Targetmol-Natural Compound Library-1680cpds	0.544304
O=C1c2ccccc2C(=O)c2c1ccc(O)c2O	L6000-Targetmol-Natural Compound Library-1680cpds	0.473029
COc1cc2c(c(OC)c1OC)-c1c(cc(OC)c(OC)c1OC)C[C@](C)(O)[C@@H](C)C2	L6000-Targetmol-Natural Compound Library-1680cpds	0.445238
OC[C@H]1O[C@@H]2O[C@@H]3[C@@H](CO)O[C@H](O[C@@H]4[C@@H](CO)O[C@H](O[C@@H]5[C@@H](CO)O[C@H](O[C@@H]6[C@@H](CO)O[C@H](O[C@@H]7[C@@H](CO)O[C@H](O[C@@H]8[C@@H](CO)O[C@H](O[C@H]1[C@H](O)[C@H]2O)[C@H](O)[C@H]8O)[C@H](O)[C@H]7O)[C@H](O)[C@H]6O)[C@H](O)[C@H]5O)[C@H](O)[C@H]4O)[C@H](O)[C@H]3O	L6000-Targetmol-Natural Compound Library-1680cpds	0.331928
CC12CCC(CC1=O)C2(C)C	L6000-Targetmol-Natural Compound Library-1680cpds	0.382812
Cc1nc(C)c(C)nc1C.Cl	L6000-Targetmol-Natural Compound Library-1680cpds	0.371542
C=C1C[C@]23C[C@@]1(O)CC[C@H]2[C@@]12C=C[C@H](O)[C@@](C)(C(=O)O1)C2[C@@H]3C(=O)O	L6000-Targetmol-Natural Compound Library-1680cpds	0.651685
CC(=O)O[C@]1(C)CC[C@@]23C[C@@H]1C(C)(C)[C@@H]2CC[C@H]3C	L6000-Targetmol-Natural Compound Library-1680cpds	0.591029
COc1cc(C[C@H]2C(=O)OC[C@@H]2Cc2ccc(OC)c(OC)c2)ccc1O	L6000-Targetmol-Natural Compound Library-1680cpds	0.481622
O=C(O)[C@]1(O)C[C@@H](O)[C@@H](O)[C@H](O)C1	L6000-Targetmol-Natural Compound Library-1680cpds	0.467172
CC(C)=CCC[C@](C)(O)C1CC[C@]2(C)C1[C@H](O)C[C@@H]1[C@@]3(C)CC[C@H](O[C@@H]4O[C@H](CO)[C@@H](O)[C@H](O)[C@H]4O)C(C)(C)[C@@H]3CC[C@]12C	L6000-Targetmol-Natural Compound Library-1680cpds	0.542348
CC(=O)O[C@@]12CO[C@@H]1C[C@H](O)[C@@]1(C)C(=O)[C@H](O)C3=C(C)[C@@H](OC(=O)[C@H](O)[C@@H](NC(=O)c4ccccc4)c4ccccc4)C[C@@](O)([C@@H](OC(=O)c4ccccc4)C12)C3(C)C	L6000-Targetmol-Natural Compound Library-1680cpds	0.585174
CC(C)=CCC[C@](C)(O[C@@H]1O[C@H](CO)[C@@H](O)[C@H](O)[C@H]1O)[C@H]1CC[C@]2(C)[C@@H]1[C@H](O)C[C@@H]1[C@@]3(C)CC[C@H](O)C(C)(C)[C@@H]3[C@@H](O[C@@H]3O[C@H](CO)[C@@H](O)[C@H](O)[C@H]3O[C@@H]3OC[C@@H](O)[C@H](O)[C@H]3O)C[C@]12C	L6000-Targetmol-Natural Compound Library-1680cpds	0.505051
CC(C)CCC[C@@H](C)C1CC[C@H]2[C@@H]3CC[C@H]4C[C@@H](O)CC[C@]4(C)[C@H]3CC[C@]12C	L6000-Targetmol-Natural Compound Library-1680cpds	0.474138
C[C@H](CCC(=O)O)[C@H]1CC[C@H]2C3[C@H](C[C@H](O)[C@@]21C)[C@@]1(C)CC[C@@H](O)C[C@H]1C[C@H]3O	L6000-Targetmol-Natural Compound Library-1680cpds	0.477901
OC[C@H]1O[C@@H](Oc2c(O)cc(O)cc2/C=C/c2ccc(O)cc2)[C@H](O)[C@@H](O)[C@@H]1O	L6000-Targetmol-Natural Compound Library-1680cpds	0.423168
C[C@H](CCC(=O)O)C1CC[C@H]2[C@@H]3CC[C@@H]4C[C@H](O)CC[C@]4(C)[C@H]3C[C@H](O)[C@]12C	L6000-Targetmol-Natural Compound Library-1680cpds	0.472222
CC[C@H](CC[C@@H](C)C1CC[C@H]2[C@@H]3CC=C4C[C@@H](O)CC[C@]4(C)[C@H]3CC[C@]12C)C(C)C	L6000-Targetmol-Natural Compound Library-1680cpds	0.660326
CC[C@@H](/C=C/[C@H](C)C1CC[C@H]2[C@@H]3CC=C4C[C@@H](O)CC[C@]4(C)[C@H]3CC[C@]12C)C(C)C	L6000-Targetmol-Natural Compound Library-1680cpds	0.665761
C[C@H](CCC(=O)O)[C@H]1CC[C@H]2[C@@H]3C[C@H](O)[C@@H]4C[C@H](O)CC[C@]4(C)[C@H]3CC[C@@]21C	L6000-Targetmol-Natural Compound Library-1680cpds	0.454787
O=C1C=C(O)C(=O)c2ccccc21	L6000-Targetmol-Natural Compound Library-1680cpds	0.407194
C=C(C)[C@H]1Cc2c(ccc3c2O[C@@H]2COc4cc(OC)c(OC)cc4[C@@H]2C3=O)O1	L6000-Targetmol-Natural Compound Library-1680cpds	0.543983
O=P(O)(O)OC1C(OP(=O)(O)O)C(OP(=O)(O)O)C(OP(=O)(O)O)C(OP(=O)(O)O)C1OP(=O)(O)O	L6000-Targetmol-Natural Compound Library-1680cpds	0.491935
O=c1c2ccccc2nc2n1CCc1c-2[nH]c2ccccc12	L6000-Targetmol-Natural Compound Library-1680cpds	0.537866
CC(C)(O)[C@@H]1CC[C@](C)(C2[C@@H](O)C[C@@]3(C)[C@@H]4C[C@H](O[C@@H]5O[C@H](CO)[C@@H](O)[C@H](O)[C@H]5O)[C@H]5C(C)(C)[C@@H](O[C@@H]6OC[C@H](O)[C@@H](O)[C@@H]6O)CC[C@@]56C[C@@]46CC[C@]23C)O1	L6000-Targetmol-Natural Compound Library-1680cpds	0.468175
CN[C@@H](C)[C@H]1[C@H](O)C[C@@]2(C)[C@@H]3CC[C@H]4C(C)(C)[C@@H](NC)CC[C@@]45C[C@@]35CC[C@]12C	L6000-Targetmol-Natural Compound Library-1680cpds	0.375
COc1cccc(C=O)c1OC	L6000-Targetmol-Natural Compound Library-1680cpds	0.501124
OC[C@]1(O)OC[C@H](O)[C@H](O)C1O	L6000-Targetmol-Natural Compound Library-1680cpds	0.526
COc1cc(C=O)ccc1OC(C)=O	L6000-Targetmol-Natural Compound Library-1680cpds	0.53277
CC1CCC(C(C)C)C(O)C1	L6000-Targetmol-Natural Compound Library-1680cpds	0.412281
COc1cc(O)c(C(C)=O)c(OC)c1	L6000-Targetmol-Natural Compound Library-1680cpds	0.499171
O=c1c2ccccc2oc2ccccc12	L6000-Targetmol-Natural Compound Library-1680cpds	0.455466
COc1cc(/C=C/C(=O)O)cc(OC)c1OC	L6000-Targetmol-Natural Compound Library-1680cpds	0.432749
COc1cc2ccc(=O)oc2cc1O	L6000-Targetmol-Natural Compound Library-1680cpds	0.389583
COc1cc2c(cc1O)CC[n+]1cc3c(OC)c(OC)ccc3cc1-2.[Cl-]	L6000-Targetmol-Natural Compound Library-1680cpds	0.503192
Oc1cc(O)c2c(c1)O[C@H](c1cc(O)c(O)c(O)c1)[C@H](O)C2	L6000-Targetmol-Natural Compound Library-1680cpds	0.579096
O=C(O[C@@H]1Cc2c(O)cc(O)cc2O[C@@H]1c1cc(O)c(O)c(O)c1)c1cc(O)c(O)c(O)c1	L6000-Targetmol-Natural Compound Library-1680cpds	0.558506
O=C(O)c1ccc(O)cc1	L6000-Targetmol-Natural Compound Library-1680cpds	0.520548
c1ccc2c(Cc3c[nH]c4ccccc34)c[nH]c2c1	L6000-Targetmol-Natural Compound Library-1680cpds	0.416069
O=C1C[C@@H](c2ccccc2)Oc2cc(O)cc(O)c21	L6000-Targetmol-Natural Compound Library-1680cpds	0.741214
Nc1ncnc2c1ncn2[C@@H]1O[C@H](CO)C[C@H]1O	L6000-Targetmol-Natural Compound Library-1680cpds	0.497574
COc1cc(O)cc(O)c1C(=O)/C=C/c1ccccc1	L6000-Targetmol-Natural Compound Library-1680cpds	0.644628
Cc1cc(O)c2c(c1)C(=O)c1cccc(O)c1C2=O	L6000-Targetmol-Natural Compound Library-1680cpds	0.472505
COc1ccc2cc1Oc1ccc(cc1)C[C@H]1c3cc(c(OC)cc3CCN1C)Oc1c(OC)c(OC)cc3c1[C@H](C2)N(C)CC3	L6000-Targetmol-Natural Compound Library-1680cpds	0.467295
O=C(O)c1cc(O)c2c(c1)C(=O)c1cccc(O)c1C2=O	L6000-Targetmol-Natural Compound Library-1680cpds	0.377652
O=C1c2c(O)cc(O)cc2O[C@H](c2cc(O)c(O)c(O)c2)[C@H]1O	L6000-Targetmol-Natural Compound Library-1680cpds	0.694118
OCc1ccc(O[C@@H]2O[C@H](CO)[C@@H](O)[C@H](O)[C@H]2O)cc1	L6000-Targetmol-Natural Compound Library-1680cpds	0.493684
C=CCc1ccc(O)c(-c2cc(CC=C)ccc2O)c1	L6000-Targetmol-Natural Compound Library-1680cpds	0.346859
C=CCc1ccc(O)c(-c2ccc(O)c(CC=C)c2)c1	L6000-Targetmol-Natural Compound Library-1680cpds	0.381306
O=C(/C=C/C=C/c1ccc2c(c1)OCO2)N1CCCCC1	L6000-Targetmol-Natural Compound Library-1680cpds	0.474044
NC(Cc1c[nH]c2ccc(O)cc12)C(=O)O	L6000-Targetmol-Natural Compound Library-1680cpds	0.514477
CCCCCCCCCCCCCCCCCCOCC(O)CO	L6000-Targetmol-Natural Compound Library-1680cpds	0.433071
O=C(/C=C/c1ccc(O)cc1)c1ccccc1	L6000-Targetmol-Natural Compound Library-1680cpds	0.515588
O=C(O)/C=C/C=C/c1ccccc1	L6000-Targetmol-Natural Compound Library-1680cpds	0.4625
NCCCNCCCCNCCCN	L6000-Targetmol-Natural Compound Library-1680cpds	0.546875
COC1=CC(=O)c2ccccc2C1=O	L6000-Targetmol-Natural Compound Library-1680cpds	0.459067
O=C(O)CC[N+](=O)[O-]	L6000-Targetmol-Natural Compound Library-1680cpds	0.472441
O=C(O)c1cc(=O)c2cccc(O)c2[nH]1	L6000-Targetmol-Natural Compound Library-1680cpds	0.34355
Nc1ccccc1C(=O)CC(N)C(=O)O	L6000-Targetmol-Natural Compound Library-1680cpds	0.380886
O=c1c2cc(O)c(O)cc2oc2cc(O)c([C@@H]3O[C@H](CO)[C@@H](O)[C@H](O)[C@H]3O)c(O)c12	L6000-Targetmol-Natural Compound Library-1680cpds	0.501362
CCC1=C[C@H]2CN3CCc4c([nH]c5ccccc45)[C@@](C(=O)OC)(C2)[C@@H]13.O=C(O)C(O)C(O)C(=O)O	L6000-Targetmol-Natural Compound Library-1680cpds	0.661332
CC1=CC(=O)CC(C)(C)[C@@]1(O)/C=C/C(C)=C\C(=O)O	L6000-Targetmol-Natural Compound Library-1680cpds	0.480576
O.OC[C@H]1O[C@H](O[C@H]2[C@H](O)[C@@H](CO)O[C@@]2(CO)O[C@H]2O[C@H](CO)[C@@H](O)[C@H](O)[C@H]2O)[C@H](O)[C@@H](O)[C@@H]1O	L6000-Targetmol-Natural Compound Library-1680cpds	0.45
O=Cc1ccc(O)c(O)c1	L6000-Targetmol-Natural Compound Library-1680cpds	0.592417
COc1cc(O)c2c(c1)C(=O)c1cc(C)cc(O)c1C2=O	L6000-Targetmol-Natural Compound Library-1680cpds	0.391738
C=C[C@](C)(O)CC[C@@H]1[C@@]2(C)CCCC(C)(C)[C@@H]2CC[C@@]1(C)O	L6000-Targetmol-Natural Compound Library-1680cpds	0.461538
CCC1=C[C@@H]2CN3CCc4c([nH]c5ccccc45)[C@@](C(=O)OC)(C2)[C@@H]13.O=S(=O)(O)O	L6000-Targetmol-Natural Compound Library-1680cpds	0.657172
C[C@@H]1[C@H]2C3=CC[C@@H]4[C@@]5(C)C[C@@H](O)[C@@H](O)[C@@](C)(CO)[C@@H]5CC[C@@]4(C)[C@]3(C)CC[C@@]2(C(=O)O[C@@H]2O[C@H](CO[C@@H]3O[C@H](CO)[C@@H](O[C@@H]4O[C@@H](C)[C@H](O)[C@@H](O)[C@H]4O)[C@H](O)[C@H]3O)[C@@H](O)[C@H](O)[C@H]2O)CC[C@H]1C	L6000-Targetmol-Natural Compound Library-1680cpds	0.681621
C/C=C1\[C@H]2C=C(C)C[C@]1(N)c1ccc(=O)[nH]c1C2	L6000-Targetmol-Natural Compound Library-1680cpds	0.540511
CC(=O)OC(C)C(C)C(=O)OC[C@]12[C@H]3CC(C)(C)[C@H](O[C@@H]1C[C@]1(C)C3=CC[C@@H]3[C@@]4(C)CC[C@H](O[C@@H]5O[C@H](C(=O)[O-])[C@@H](O[C@H]6O[C@H](CO)[C@@H](O)[C@H](O)[C@H]6O)[C@H](O)[C@H]5O[C@@H]5OC[C@@H](O)[C@H](O)[C@H]5O)[C@](C)(CO)[C@@H]4CC[C@]31C)[C@@H]2O.[Na+]	L6000-Targetmol-Natural Compound Library-1680cpds	0.613245
CC1=C(O)C(=O)C=C2C1=CC=C1[C@@]3(C)CC[C@@]4(C)CC[C@@](C)(C(=O)O)C[C@H]4[C@]3(C)CC[C@@]21C	L6000-Targetmol-Natural Compound Library-1680cpds	0.531884
O=C1CCC[C@@H]2[C@H]3CCCN4CCC[C@H](CN12)[C@@H]34	L6000-Targetmol-Natural Compound Library-1680cpds	0.367238
CC(=O)OCC(=O)[C@H]1CC[C@H]2[C@@H]3CCC4=CC(=O)CC[C@]4(C)[C@H]3CC[C@]12C	L6000-Targetmol-Natural Compound Library-1680cpds	0.564748
CC1(C)CC[C@]2(C(=O)O)CC[C@]3(C)C(=CC[C@@H]4[C@@]5(C)CC[C@H](O)[C@@](C)(CO)[C@@H]5CC[C@]43C)[C@@H]2C1	L6000-Targetmol-Natural Compound Library-1680cpds	0.829522
COc1cc2c(cc1O)[C@@H](Cc1ccc(O)c(Oc3ccc(C[C@@H]4c5cc(OC)c(OC)cc5CCN4C)cc3)c1)N(C)CC2	L6000-Targetmol-Natural Compound Library-1680cpds	0.407913
COc1cc2c(cc1CC=C(C)C)C(=O)C[C@@H](c1ccc(O)cc1)O2	L6000-Targetmol-Natural Compound Library-1680cpds	0.697381
CC(C)C1=CC2=CC[C@H]3[C@](C)(C(=O)O)CCC[C@]3(C)[C@H]2CC1	L6000-Targetmol-Natural Compound Library-1680cpds	0.593633
NCCc1ccc(O)cc1	L6000-Targetmol-Natural Compound Library-1680cpds	0.50237
C=C(C)[C@@H]1CC[C@]2(CO)CC[C@]3(C)[C@H](CC[C@@H]4[C@@]5(C)CC[C@H](O)C(C)(C)[C@@H]5CC[C@]43C)C12	L6000-Targetmol-Natural Compound Library-1680cpds	0.575
C/C1=C2/N=C(/C=C3\N=C(/C(C)=C4\[N-][C@H]([C@H](CC(N)=O)[C@@]4(C)CCC(=O)NC[C@H](C)OP(=O)([O-])O[C@@H]4[C@@H](CO)O[C@H](n5cnc6cc(C)c(C)cc65)[C@@H]4O)[C@]4(C)N=C1[C@@H](CCC(N)=O)[C@]4(C)CC(N)=O)[C@@H](CCC(N)=O)C3(C)C)[C@@H](CCC(N)=O)[C@]2(C)CC(N)=O.[CH3-].[Co+3]	L6000-Targetmol-Natural Compound Library-1680cpds	0.679552
CC1=C(/C=C/C(C)=C/C=C/C(C)=C/C=C/C=C(C)/C=C/C=C(C)/C=C/C2=C(C)C(=O)[C@@H](O)CC2(C)C)C(C)(C)C[C@H](O)C1=O	L6000-Targetmol-Natural Compound Library-1680cpds	0.466468
O.O.OC[C@H]1O[C@H](O[C@H]2O[C@H](CO)[C@@H](O)[C@H](O)[C@H]2O)[C@H](O)[C@@H](O)[C@@H]1O	L6000-Targetmol-Natural Compound Library-1680cpds	0.341811
O=C(/C=C/c1ccc(O)c2oc(-c3ccc(O)c(O)c3)cc12)O[C@H](Cc1ccc(O)c(O)c1)C(=O)O	L6000-Targetmol-Natural Compound Library-1680cpds	0.466893
CC(C)[C@@H](C)[C@H](O)[C@@H](O)[C@@H](C)C1CC[C@H]2[C@@H]3COC(=O)[C@H]4C[C@H](O)[C@H](O)C[C@]4(C)[C@H]3CC[C@]12C	L6000-Targetmol-Natural Compound Library-1680cpds	0.508137
Cc1nccc2c1[nH]c1cc(O)ccc12	L6000-Targetmol-Natural Compound Library-1680cpds	0.448232
CC(C)=CCCC(C)=CC=O	L6000-Targetmol-Natural Compound Library-1680cpds	0.512195
Cc1nccc2c1[nH]c1ccccc12	L6000-Targetmol-Natural Compound Library-1680cpds	0.395543
Cc1ccc(C(C)C)cc2c(C)ccc1-2	L6000-Targetmol-Natural Compound Library-1680cpds	0.507099
CC(=O)O[C@H]1C2[C@@H](OC(=O)Cc3ccccc3)[C@@H](C)C[C@]2(OC(C)=O)C(=O)/C(C)=C\[C@@H]2[C@H](CC[C@@]13CO3)C2(C)C	L6000-Targetmol-Natural Compound Library-1680cpds	0.542998
O=C(O)[C@H](O)Cc1ccc(O)c(O)c1	L6000-Targetmol-Natural Compound Library-1680cpds	0.493369
Cl.Oc1ccc(CC2NCCc3cc(O)c(O)cc32)cc1	L6000-Targetmol-Natural Compound Library-1680cpds	0.483645
O=c1c(-c2ccc(O[C@@H]3O[C@H](CO)[C@@H](O)[C@H](O)[C@H]3O)cc2)coc2cc(O)cc(O)c12	L6000-Targetmol-Natural Compound Library-1680cpds	0.45167
CC1(C)CCC[C@@]2(C)OC(=O)C=C12	L6000-Targetmol-Natural Compound Library-1680cpds	0.563333
C=C1C[C@@]23CC[C@H]4[C@@](C)(CCC[C@@]4(C)C(=O)O[C@@H]4O[C@H](CO)[C@@H](O)[C@H](O)[C@H]4O)[C@@H]2CC[C@]1(O[C@@H]1O[C@H](CO)[C@@H](O)[C@H](O[C@@H]2O[C@H](CO)[C@@H](O)[C@H](O)[C@H]2O)[C@H]1O[C@@H]1O[C@H](CO)[C@@H](O)[C@H](O)[C@H]1O)C3	L6000-Targetmol-Natural Compound Library-1680cpds	0.560367
CC(C)=CCC/C(C)=C/CC/C(C)=C/CC/C(C)=C/CC/C(C)=C/CC/C(C)=C/CC/C(C)=C/CC/C(C)=C/CC/C(C)=C/CO	L6000-Targetmol-Natural Compound Library-1680cpds	0.512
CCCCC/C=C/C/C=C/CCCCCCCC(=O)O[C@H](COC(=O)CCCCCCCCCCCCCCC)COP(=O)([O-])OCC[N+](C)(C)C	L6000-Targetmol-Natural Compound Library-1680cpds	0.380451
CCCCCCCCCCCCCCCCCCOC(=O)CCCCCCCCCCCCCCC	L6000-Targetmol-Natural Compound Library-1680cpds	0.382979
C/C=C(\C)C(=O)OC/C=C(\C)CCC=C(C)C	L6000-Targetmol-Natural Compound Library-1680cpds	0.368957
CC(C)=CCCC(C)CCO	L6000-Targetmol-Natural Compound Library-1680cpds	0.511811
C[N+](C)(C)CC(=O)[O-]	L6000-Targetmol-Natural Compound Library-1680cpds	0.354331
O=S(=O)([O-])N[C@H]1C(O)O[C@H](CO)[C@@H](O)[C@@H]1O.[Na+]	L6000-Targetmol-Natural Compound Library-1680cpds	0.508081
C=C(C)[C@H]1CC=C(C)C(=O)C1	L6000-Targetmol-Natural Compound Library-1680cpds	0.445876
CC[C@@]12C=CCN3CC[C@@]4(C(=C(C(=O)OC)C1)Nc1ccccc14)[C@H]32	L6000-Targetmol-Natural Compound Library-1680cpds	0.645768
CC1(C)CC[C@]2(C)CC[C@]3(C)C(=CC[C@@H]4[C@@]5(C)CC[C@@H](O)[C@](C)(C(=O)O)[C@@H]5CC[C@]43C)[C@@H]2C1	L6000-Targetmol-Natural Compound Library-1680cpds	0.710372
O=C([O-])[O-].[Ca+2]	L6000-Targetmol-Natural Compound Library-1680cpds	0.140625
O=C(O)/C=C/CCCCCCCO	L6000-Targetmol-Natural Compound Library-1680cpds	0.330435
C[N+]1(C)CCC[C@H]1C(=O)O.[Cl-]	L6000-Targetmol-Natural Compound Library-1680cpds	0.403651
CCCCCCCCCCCCCCCCCCCCCCCCCCCCCCO	L6000-Targetmol-Natural Compound Library-1680cpds	0.34375
CCCCCCC(O)CCCCCCCCCCC(=O)OCC(COC(=O)CCCCCCCCCCC(O)CCCCCC)OC(=O)CCCCCCCCCCC(O)CCCCCC	L6000-Targetmol-Natural Compound Library-1680cpds	0.412658
C/C(=C\CO)CCCC(C)CCCC(C)CCCC(C)C	L6000-Targetmol-Natural Compound Library-1680cpds	0.344978
CN(CC(=O)O)C(=N)NP(=O)([O-])[O-].[Na+].[Na+]	L6000-Targetmol-Natural Compound Library-1680cpds	0.407658
O=C([O-])c1cc(=O)[nH]c(=O)[nH]1.O=C([O-])c1cc(=O)[nH]c(=O)[nH]1.[Zn+2]	L6000-Targetmol-Natural Compound Library-1680cpds	0.342826
O=C(O)[C@H]1CSC(c2nc3ccc(O)cc3s2)=N1	L6000-Targetmol-Natural Compound Library-1680cpds	0.4156
C=C(C)C1CC=C(CO)CC1	L6000-Targetmol-Natural Compound Library-1680cpds	0.401639
COc1c(O[C@@H]2O[C@H](C(=O)O)[C@@H](O)[C@H](O)[C@H]2O)cc(O)c2c(=O)cc(-c3ccccc3)oc12	L6000-Targetmol-Natural Compound Library-1680cpds	0.543122
O=c1cc(-c2ccc(O)cc2)oc2cc(O)c(O)c(O)c12	L6000-Targetmol-Natural Compound Library-1680cpds	0.381208
CC1(C)CC[C@]2(C(=O)O)CC[C@]3(C)C(=CC[C@@H]4[C@@]5(C)CCC(=O)C(C)(C)[C@@H]5CC[C@]43C)[C@@H]2C1	L6000-Targetmol-Natural Compound Library-1680cpds	0.706114
C[C@@H]1[C@H]2C3=CC[C@@H]4[C@@]5(C)CCC(=O)C(C)(C)[C@@H]5CC[C@@]4(C)[C@]3(C)CC[C@@]2(C(=O)O)CC[C@H]1C	L6000-Targetmol-Natural Compound Library-1680cpds	0.711198
O[C@H]1C=C2CCN3Cc4cc5c(cc4[C@H]([C@@H]1O)[C@@H]23)OCO5	L6000-Targetmol-Natural Compound Library-1680cpds	0.5629
O=C1C[C@@H](c2ccc(O)cc2)Oc2cc(O)ccc21	L6000-Targetmol-Natural Compound Library-1680cpds	0.751357
CCO[C@H]1O[C@@H]2O[C@@]3(C)CC[C@H]4[C@H](C)CC[C@@H]([C@H]1C)[C@]42OO3	L6000-Targetmol-Natural Compound Library-1680cpds	0.442432
C/C=C(/C)C(=O)O	L6000-Targetmol-Natural Compound Library-1680cpds	0.392
COc1ccc(-c2coc3cc(OC)ccc3c2=O)cc1	L6000-Targetmol-Natural Compound Library-1680cpds	0.357419
COc1ccc(/C=C/c2cc(OC)cc(OC)c2)cc1	L6000-Targetmol-Natural Compound Library-1680cpds	0.450893
C[C@@]12CCC3[C@]4(C)CCC[C@@](C)(C(=O)O)[C@H]4CC[C@]3(CC1=O)C2	L6000-Targetmol-Natural Compound Library-1680cpds	0.530831
CC(C)(O)[C@H]1CC[C@@](C)(C2[C@H](O)C[C@@]3(C)[C@@H]4C[C@H](O)[C@H]5C(C)(C)[C@@H](O)CC[C@@]56C[C@@]46CC[C@]23C)O1	L6000-Targetmol-Natural Compound Library-1680cpds	0.490566
C=CCc1cc(OC)c(OC)c(OC)c1	L6000-Targetmol-Natural Compound Library-1680cpds	0.577844
COc1cc(O)c(CC=C(C)C)c(O)c1C(=O)/C=C/c1ccc(O)cc1	L6000-Targetmol-Natural Compound Library-1680cpds	0.72814
COc1cccc2oc(-c3ccccc3)cc(=O)c12	L6000-Targetmol-Natural Compound Library-1680cpds	0.365621
COc1ccc(-c2cc(=O)c3c(O)c(OC)c(O)cc3o2)cc1OC	L6000-Targetmol-Natural Compound Library-1680cpds	0.40493
CC1=C2C(=O)[C@H]3[C@@H](CC=C4C[C@@H](O)CC[C@@]43C)[C@@H]2CC[C@]12O[C@@H]1C[C@H](C)CN[C@H]1[C@H]2C	L6000-Targetmol-Natural Compound Library-1680cpds	0.53688
Cc1c([C@H](C)C2NC[C@@H](C)C[C@H]2O)ccc2c1C[C@H]1[C@H]2CC=C2C[C@@H](O)CC[C@@]21C	L6000-Targetmol-Natural Compound Library-1680cpds	0.50464
C=C1C[C@]23CC[C@H]4[C@@](C)(CCC[C@@]4(C)C(=O)O[C@@H]4O[C@H](CO)[C@@H](O)[C@H](O)[C@H]4O)[C@@H]2CC[C@@]1(O[C@@H]1O[C@H](CO)[C@@H](O)[C@H](O[C@@H]2O[C@H](CO)[C@@H](O)[C@H](O)[C@H]2O[C@@H]2O[C@@H](C)[C@H](O)[C@@H](O)[C@H]2O)[C@H]1O)C3	L6000-Targetmol-Natural Compound Library-1680cpds	0.562582
COC1=C[C@]23CCCN2CCc2cc4c(cc2[C@@H]3[C@@H]1O)OCO4	L6000-Targetmol-Natural Compound Library-1680cpds	0.560678
C[C@@H]1O[C@@H](O[C@H]2[C@H](O[C@H]3CC[C@@]4(C)[C@@H](CC[C@]5(C)[C@@H]4CC=C4[C@@H]6CC(C)(C)CC[C@]6(C(=O)O)CC[C@]45C)[C@]3(C)CO)OC[C@H](O)[C@@H]2O)[C@H](O)[C@H](O)[C@H]1O	L6000-Targetmol-Natural Compound Library-1680cpds	0.68175
COc1cc2c3c(c1OC)-c1ccccc1C[C@H]3N(C)CC2	L6000-Targetmol-Natural Compound Library-1680cpds	0.497459
CC1(C)CC[C@@]2(C(=O)O)[C@@H](C1)C1=CC[C@@H]3[C@@]4(C)CC[C@H](O)[C@@](C)(C=O)[C@@H]4CC[C@@]3(C)[C@]1(C)C[C@H]2O	L6000-Targetmol-Natural Compound Library-1680cpds	0.773512
C/C=C(\C)C(=O)OC(C)(C)[C@@H]1Cc2c(ccc3ccc(=O)oc23)O1	L6000-Targetmol-Natural Compound Library-1680cpds	0.485204
Cc1cccc2c3c(ccc12)C1=C(C(=O)C3=O)[C@@H](C)CO1	L6000-Targetmol-Natural Compound Library-1680cpds	0.493996
C[C@@H]1O[C@@H](O[C@@H]2[C@@H](O)[C@H](OCCc3ccc(O)c(O)c3)O[C@H](CO)[C@H]2OC(=O)/C=C/c2ccc(O)c(O)c2)[C@H](O)[C@H](O)[C@H]1O	L6000-Targetmol-Natural Compound Library-1680cpds	0.435714
O=c1cc(-c2ccc(O)c(O)c2)oc2cc(O[C@@H]3O[C@H](CO)[C@@H](O)[C@H](O)[C@H]3O)cc(O)c12	L6000-Targetmol-Natural Compound Library-1680cpds	0.478237
N[C@@H](Cc1ccccc1)C(=O)O	L6000-Targetmol-Natural Compound Library-1680cpds	0.361194
C[C@]12CC[C@@H]3c4ccc(O)cc4CC[C@H]3[C@@H]1CC[C@H]2O	L6000-Targetmol-Natural Compound Library-1680cpds	0.502597
CCCCCCCCCC(=O)O	L6000-Targetmol-Natural Compound Library-1680cpds	0.36
COC(=O)C[C@](O)(CCCC(C)(C)O)C(=O)O[C@@H]1C(OC)=CC23CCCN2CCc2cc4c(cc2[C@H]13)OCO4	L6000-Targetmol-Natural Compound Library-1680cpds	0.629917
COc1ccc(-c2cc(=O)c3c(O)c(OC)c(O)c(OC)c3o2)cc1	L6000-Targetmol-Natural Compound Library-1680cpds	0.43526
CC1(C)[C@@H](O)CC[C@@]2(C)[C@H]1CC[C@]1(C)[C@@H]2CC=C2[C@@H]3C[C@@]4(C)C[C@H](OC4=O)[C@]3(C)CC[C@]21C	L6000-Targetmol-Natural Compound Library-1680cpds	0.812963
COc1c2c(cc3oc(CO)cc(=O)c13)O[C@H](C(C)(C)O)C2	L6000-Targetmol-Natural Compound Library-1680cpds	0.479955
COc1cc(O)c2c(c1)oc(=O)c1c3cc(O)c(O)cc3oc21	L6000-Targetmol-Natural Compound Library-1680cpds	0.372576
CC(C)=CCC[C@](C)(O[C@@H]1O[C@H](CO[C@@H]2O[C@H](CO)[C@@H](O)[C@H](O)[C@H]2O)[C@@H](O)[C@H](O)[C@H]1O)C1CC[C@]2(C)C1[C@H](O)C[C@@H]1[C@@]3(C)CC[C@H](O[C@@H]4O[C@H](CO)[C@@H](O)[C@H](O)[C@H]4O)C(C)(C)[C@@H]3CC[C@]12C	L6000-Targetmol-Natural Compound Library-1680cpds	0.547307
C[C@@H]1O[C@@H](Oc2cc(O)c3c(=O)c(O[C@@H]4O[C@@H](C)[C@H](O)[C@@H](O)[C@H]4O)c(-c4ccc(O)cc4)oc3c2)[C@H](O)[C@H](O)[C@H]1O	L6000-Targetmol-Natural Compound Library-1680cpds	0.540409
COc1ccc(-c2coc3cc(O[C@@H]4O[C@H](CO)[C@@H](O)[C@H](O)[C@H]4O)ccc3c2=O)cc1O	L6000-Targetmol-Natural Compound Library-1680cpds	0.449649
CC1(C)OC(=O)C=C[C@@]2(C)[C@H]1CC(=O)[C@]1(C)[C@@H]2CC[C@@]2(C)[C@H](c3ccoc3)OC(=O)[C@H]3O[C@]321	L6000-Targetmol-Natural Compound Library-1680cpds	0.550114
C[C@@H]1[C@H]2C3=CC[C@@H]4[C@@]5(C)C[C@@H](O)[C@H](O)C(C)(C)[C@@H]5CC[C@@]4(C)[C@]3(C)CC[C@@]2(C(=O)O)CC[C@H]1C	L6000-Targetmol-Natural Compound Library-1680cpds	0.78672
COc1cc(/C=C/C(=O)OCC[N+](C)(C)C)c(OC)cc1O.N#C[S-]	L6000-Targetmol-Natural Compound Library-1680cpds	0.495199
CC(C)c1ccc2c(c1O)CC[C@H]1C3=C(CC[C@]21C)C(=O)OC3	L6000-Targetmol-Natural Compound Library-1680cpds	0.507747
C[C@@H](CCC1(O)O[C@H]2C[C@H]3[C@@H]4CC[C@@H]5C[C@@H](O[C@@H]6O[C@H](CO)[C@H](O)[C@H](O)[C@H]6O[C@@H]6O[C@H](CO)[C@@H](O)[C@H](O)[C@H]6O)CC[C@]5(C)[C@H]4CC[C@]3(C)C2[C@@H]1C)CO[C@@H]1O[C@H](CO)[C@@H](O)[C@H](O)[C@H]1O	L6000-Targetmol-Natural Compound Library-1680cpds	0.486842
C[C@H]1C2[C@H](C[C@H]3[C@@H]4CC[C@@H]5C[C@@H](O[C@@H]6O[C@H](CO)[C@H](O)[C@H](O)[C@H]6O[C@@H]6O[C@H](CO)[C@@H](O)[C@H](O)[C@H]6O)CC[C@]5(C)[C@H]4CC[C@]23C)O[C@]12CC[C@@H](C)CO2	L6000-Targetmol-Natural Compound Library-1680cpds	0.495951
COc1ccc(-c2oc3c(CC=C(C)C)c(O)cc(O)c3c(=O)c2O[C@@H]2O[C@@H](C)[C@H](O)[C@@H](O)[C@H]2O)cc1	L6000-Targetmol-Natural Compound Library-1680cpds	0.594723
COc1ccc(-c2oc3c(CC=C(C)C)c(O[C@@H]4O[C@H](CO)[C@@H](O)[C@H](O)[C@H]4O)cc(O)c3c(=O)c2O[C@@H]2O[C@@H](C)[C@H](O)[C@@H](O)[C@H]2O[C@@H]2O[C@@H](C)[C@H](O)[C@@H](O)[C@H]2O)cc1	L6000-Targetmol-Natural Compound Library-1680cpds	0.627145
COc1ccc(-c2oc3c(CC=C(C)C)c(O)cc(O)c3c(=O)c2O)cc1	L6000-Targetmol-Natural Compound Library-1680cpds	0.491041
CC(C)=CCc1cc2c(cc1O)oc(=O)c1c3ccc(O)cc3oc21	L6000-Targetmol-Natural Compound Library-1680cpds	0.374378
CC(C)=CCC[C@](C)(O[C@@H]1O[C@H](CO)[C@@H](O)[C@H](O)[C@H]1O)C1CC[C@]2(C)C1[C@H](O)C[C@@H]1[C@@]3(C)CC[C@H](O)C(C)(C)[C@@H]3[C@@H](O)C[C@]12C	L6000-Targetmol-Natural Compound Library-1680cpds	0.543446
CC(C)=CCC[C@](C)(O)C1CC[C@]2(C)C1[C@H](O)C[C@@H]1[C@@]3(C)CC[C@H](O[C@@H]4O[C@H](CO)[C@@H](O)[C@H](O)[C@H]4O[C@@H]4O[C@H](CO)[C@@H](O)[C@H](O)[C@H]4O)C(C)(C)[C@@H]3CC[C@]12C	L6000-Targetmol-Natural Compound Library-1680cpds	0.541364
CC1(C)C=Cc2c(ccc3c2OC[C@@H](c2ccc(O)cc2O)C3)O1	L6000-Targetmol-Natural Compound Library-1680cpds	0.552343
CC(=O)OC(C)(C)/C=C/C(=O)[C@](C)(O)[C@H]1[C@H](O)C[C@@]2(C)[C@@H]3CC=C4[C@@H](C[C@H](O)C(=O)C4(C)C)[C@]3(C)C(=O)C[C@]12C	L6000-Targetmol-Natural Compound Library-1680cpds	0.597701
CCCCC[C@H](O)CC(=O)CCc1ccc(O)c(OC)c1	L6000-Targetmol-Natural Compound Library-1680cpds	0.40249
OC[C@H]1OC(Oc2cc3c(O)cc(O)cc3[o+]c2-c2ccc(O)c(O)c2)[C@H](O)[C@@H](O)[C@@H]1O.[Cl-]	L6000-Targetmol-Natural Compound Library-1680cpds	0.477398
COc1cc(/C=C/CO)cc(OC)c1O[C@@H]1O[C@H](CO)[C@@H](O)[C@H](O)[C@H]1O	L6000-Targetmol-Natural Compound Library-1680cpds	0.40223
O=C(/C=C/c1ccc(O)c(O)c1)O[C@@H]1[C@@H](CO)O[C@@H](OCCc2ccc(O)c(O)c2)[C@H](O)[C@H]1O[C@@H]1O[C@H](CO)[C@@H](O)[C@H](O)[C@H]1O	L6000-Targetmol-Natural Compound Library-1680cpds	0.435714
CC1(C)CC[C@]2(C(=O)O)CC[C@]3(C)C(=CC[C@@H]4[C@@]5(C)CC[C@H](O[C@@H]6O[C@@H](C(=O)O)[C@H](O)[C@@H](O[C@H]7OC[C@H](O)[C@@H](O)[C@@H]7O)[C@@H]6O)C(C)(C)[C@@H]5CC[C@]43C)[C@@H]2C1	L6000-Targetmol-Natural Compound Library-1680cpds	0.67147
C/C1=C\CC[C@H](C)C(=O)C[C@H](C(C)C)C(=O)C1	L6000-Targetmol-Natural Compound Library-1680cpds	0.446194
OCCc1ccc(O)c(O)c1	L6000-Targetmol-Natural Compound Library-1680cpds	0.491694
COc1c2c(cc3oc(C)cc(=O)c13)O[C@H](C(C)(C)O[C@H]1O[C@H](CO)[C@@H](O)[C@H](O)[C@H]1O)C2	L6000-Targetmol-Natural Compound Library-1680cpds	0.537588
COC(=O)C1=CO[C@@H](O[C@@H]2O[C@H](CO)[C@@H](O)[C@H](O)[C@H]2O)C2[C@H](C)OC(O)C[C@H]12	L6000-Targetmol-Natural Compound Library-1680cpds	0.505762
COc1cc(C[C@H](CO[C@H]2O[C@H](CO)[C@@H](O)[C@H](O)[C@H]2O)[C@H](CO[C@H]2O[C@H](CO)[C@@H](O)[C@H](O)[C@H]2O)Cc2ccc(O)c(OC)c2)ccc1O	L6000-Targetmol-Natural Compound Library-1680cpds	0.407263
OCC1=C[C@@H](O)[C@@H]2C=CO[C@@H](O[C@@H]3O[C@H](CO)[C@@H](O)[C@H](O)[C@H]3O)[C@H]12	L6000-Targetmol-Natural Compound Library-1680cpds	0.48708
O=c1cc(-c2ccc(O)c(-c3c(O)cc(O)c4c(=O)cc(-c5ccc(O)cc5)oc34)c2)oc2cc(O)cc(O)c12	L6000-Targetmol-Natural Compound Library-1680cpds	0.446591
C[C@@]12CC[C@]3(C)C4=CC(=O)c5c(cc(O)c(O)c5C=O)[C@]4(C)CC[C@@]3(C)[C@@H]1C[C@](C)(C(=O)O)CC2	L6000-Targetmol-Natural Compound Library-1680cpds	0.501656
COc1ccc2c(c[n+](C)c3c4cc5c(cc4ccc23)OCO5)c1OC.[Cl-]	L6000-Targetmol-Natural Compound Library-1680cpds	0.512712
O=Cc1ccc(O[C@@H]2O[C@H](CO)[C@@H](O)[C@@H](O)[C@H]2O)cc1	L6000-Targetmol-Natural Compound Library-1680cpds	0.497366
CN1CCc2cc3c(cc2C(=O)Cc2ccc4c(c2C1)OCO4)OCO3	L6000-Targetmol-Natural Compound Library-1680cpds	0.42735
CC(=O)O[C@@H]1[C@H](c2ccc(=O)oc2)[C@@]2(C)CC[C@H]3[C@@H](CC[C@@H]4C[C@@H](O)CC[C@]34C)[C@]23O[C@H]13	L6000-Targetmol-Natural Compound Library-1680cpds	0.513264
COc1c(O)cc2occ(-c3ccc(O)cc3)c(=O)c2c1O	L6000-Targetmol-Natural Compound Library-1680cpds	0.401442
CC[C@H](C)CCCCC(=O)N[C@@H](CCNCS(=O)(=O)O)C(=O)N[C@H](C(=O)N[C@@H](CCNCS(=O)(=O)O)C(=O)N[C@H]1CCNC(=O)C([C@@H](C)O)NC(=O)[C@H](CCNCS(=O)(=O)O)NC(=O)[C@H](CCN)NC(=O)[C@H](CC(C)C)NC(=O)[C@@H](CC(C)C)NC(=O)[C@H](CCNCS(=O)(=O)O)NC1=O)[C@@H](C)O	L6000-Targetmol-Natural Compound Library-1680cpds	0.453597
CC(C)(CO)[C@@H](O)C(=O)NCCC(=O)[O-].CC(C)(CO)[C@@H](O)C(=O)NCCC(=O)[O-].[Ca+2]	L6000-Targetmol-Natural Compound Library-1680cpds	0.419878
C=CC(C)(C)c1cc(/C=C/C(=O)c2ccc(O)cc2)c(OC)cc1O	L6000-Targetmol-Natural Compound Library-1680cpds	0.745098
CCCCCCCCCCCCOC(=O)CS(=O)(=O)O[Na]	L6000-Targetmol-Natural Compound Library-1680cpds	0.384778
COc1cc(/C=C/C(=O)O[C@H]2CC[C@]34C[C@]35CC[C@]3(C)C([C@H](C)CCC=C(C)C)CC[C@@]3(C)[C@@H]5CC[C@H]4C2(C)C)ccc1O	L6000-Targetmol-Natural Compound Library-1680cpds	0.715743
CO[C@@H]1[C@@H](O[C@@H]2O[C@H](C)[C@@H](O[C@H]3C[C@@](C)(O)[C@@H](O)[C@H](C)O3)[C@H](N(C)C)[C@H]2O)[C@@H](CC=O)C[C@@H](C)[C@@H](O)/C=C/C=C/C[C@@H](C)OC(=O)C[C@H]1O	L6000-Targetmol-Natural Compound Library-1680cpds	0.487745
CCCN1C[C@H](C)[C@@H](O)[C@](C)(O)[C@@H](CC)OC(=O)[C@H](C)[C@@H](O[C@H]2C[C@@](C)(OC)[C@@H](O)[C@H](C)O2)[C@H](C)[C@@H](O[C@@H]2O[C@H](C)C[C@H](N(C)C)[C@H]2O)[C@](C)(O)C[C@H]1C	L6000-Targetmol-Natural Compound Library-1680cpds	0.490244
COc1cc([C@@H]2OC[C@@H]3[C@@H](c4cc(OC)c(O[C@H]5O[C@@H](CO)[C@H](O)[C@@H](O)[C@@H]5O)c(OC)c4)OC[C@H]23)cc(OC)c1O[C@@H]1O[C@H](CO)[C@@H](O)[C@H](O)[C@H]1O	L6000-Targetmol-Natural Compound Library-1680cpds	0.474453
COc1c(O[C@@H]2O[C@H](CO)[C@@H](O)[C@H](O)[C@H]2O)cc2occ(-c3ccc(O)cc3)c(=O)c2c1O	L6000-Targetmol-Natural Compound Library-1680cpds	0.497032
C/C=C/C#CC#C/C=C/c1ccco1	L6000-Targetmol-Natural Compound Library-1680cpds	0.32766
C=C1CC[C@@H]2[C@](C)(COC(=O)CCC(=O)[O-])C(OC(=O)CCC(=O)O)CC[C@@]2(C)[C@@H]1/C=C/C1=CCOC1=O.[K+]	L6000-Targetmol-Natural Compound Library-1680cpds	0.637795
O=c1c(O)c(-c2ccccc2)oc2cc(O)cc(O)c12	L6000-Targetmol-Natural Compound Library-1680cpds	0.386282
CC1=C[C@@]2(O)O[C@@]3(CC2=C(C)C)[C@@H](C)CC[C@@H]13	L6000-Targetmol-Natural Compound Library-1680cpds	0.512821
C[C@@H]1O[C@@H](OC[C@H]2O[C@@H](OCCc3ccc(O)c(O)c3)[C@H](O)[C@@H](O)[C@@H]2OC(=O)/C=C/c2ccc(O)c(O)c2)[C@H](O)[C@H](O)[C@H]1O	L6000-Targetmol-Natural Compound Library-1680cpds	0.436771
C[C@H]1O[C@@H](O[C@H]2[C@H](c3c(O)cc(O)c4c(=O)cc(-c5ccc(O)cc5)oc34)O[C@H](CO)[C@@H](O)[C@@H]2O)[C@@H](O)[C@@H](O)[C@@H]1O	L6000-Targetmol-Natural Compound Library-1680cpds	0.611956
COC(=O)c1c2c(c3ccccc3c1O)OC(C)(C)C=C2	L6000-Targetmol-Natural Compound Library-1680cpds	0.468519
O=C(/C=C/c1ccc(O)cc1)C1=C(O)C(O)([C@@H]2O[C@H](CO)[C@@H](O)[C@H](O)[C@H]2O)C(O)=C([C@@H]2O[C@H](CO)[C@@H](O)[C@H](O)[C@H]2O)C1=O	L6000-Targetmol-Natural Compound Library-1680cpds	0.525524
OC[C@H]1NC[C@H](O)[C@@H](O)[C@@H]1O	L6000-Targetmol-Natural Compound Library-1680cpds	0.44668
Oc1ccc2c(c1)OCO2	L6000-Targetmol-Natural Compound Library-1680cpds	0.355623
O=C(/C=C/c1ccc(O)c2c1[C@H](C(=O)O)[C@@H](c1ccc(O)c(O)c1)O2)O[C@H](Cc1ccc(O)c(O)c1)C(=O)O	L6000-Targetmol-Natural Compound Library-1680cpds	0.550108
COc1cc2c(=O)c3c(O)c([C@@H]4O[C@H](CO[C@@H]5OC[C@](O)(CO)[C@H]5O)[C@@H](O)[C@H](O)[C@H]4O)c(O)cc3oc2cc1O	L6000-Targetmol-Natural Compound Library-1680cpds	0.541201
COc1cc(/C=C/C(=O)C(O)[C@H]2OC(OC3(CO)O[C@H](CO)[C@@H](O)[C@@H]3O)[C@H](O)[C@](O)(C(=O)/C=C/c3cc(OC)c(O)c(OC)c3)[C@@H]2O)cc(OC)c1O	L6000-Targetmol-Natural Compound Library-1680cpds	0.489068
C/C=C/c1cc(OC)c(OC)cc1OC	L6000-Targetmol-Natural Compound Library-1680cpds	0.457006
CC(C)c1cccc(O)c(=O)c1	L6000-Targetmol-Natural Compound Library-1680cpds	0.417647
CC1=C2[C@H]3OC(=O)[C@@H](C)[C@@H]3CC[C@@]2(C)C=CC1=O	L6000-Targetmol-Natural Compound Library-1680cpds	0.626801
COC(=O)c1cc(OC)c(O)c(OC)c1	L6000-Targetmol-Natural Compound Library-1680cpds	0.42348
COC(=O)c1ccc(O)cc1	L6000-Targetmol-Natural Compound Library-1680cpds	0.403785
CCOC(=O)c1cc(O)c(O)c(O)c1	L6000-Targetmol-Natural Compound Library-1680cpds	0.548387
COC(=O)c1cc(O)c(O)c(O)c1	L6000-Targetmol-Natural Compound Library-1680cpds	0.542169
O=C(O)CCCCCCCCC(=O)O	L6000-Targetmol-Natural Compound Library-1680cpds	0.36
COC(=O)/C=C/c1ccc(O)cc1	L6000-Targetmol-Natural Compound Library-1680cpds	0.382979
COc1cc(CCC(=O)CC(=O)CCc2ccc(O)c(OC)c2)ccc1O	L6000-Targetmol-Natural Compound Library-1680cpds	0.420705
CCCCCc1cc(O)cc(O)c1	L6000-Targetmol-Natural Compound Library-1680cpds	0.451613
O=C(O)CCc1ccc(O)cc1O	L6000-Targetmol-Natural Compound Library-1680cpds	0.474777
COc1ccc(C=O)cc1O	L6000-Targetmol-Natural Compound Library-1680cpds	0.492063
O=C(O)Cc1ccc(O)cc1	L6000-Targetmol-Natural Compound Library-1680cpds	0.522321
COc1ccc(C(=O)O)cc1OC	L6000-Targetmol-Natural Compound Library-1680cpds	0.521253
COC(=O)c1ccccc1C(=O)OC	L6000-Targetmol-Natural Compound Library-1680cpds	0.452214
COc1cc(C=O)cc(OC)c1O	L6000-Targetmol-Natural Compound Library-1680cpds	0.52439
Cc1cc(O)cc(O)c1	L6000-Targetmol-Natural Compound Library-1680cpds	0.436019
Oc1cccc(O)c1O	L6000-Targetmol-Natural Compound Library-1680cpds	0.487603
CC(=O)c1ccc(O)cc1O	L6000-Targetmol-Natural Compound Library-1680cpds	0.496914
OCc1ccc(O)cc1	L6000-Targetmol-Natural Compound Library-1680cpds	0.401869
COc1cc(/C=C/C(=O)O)cc(OC)c1O	L6000-Targetmol-Natural Compound Library-1680cpds	0.545861
COc1cc(O)cc(/C=C/c2ccc(O)cc2)c1	L6000-Targetmol-Natural Compound Library-1680cpds	0.442136
OC[C@H](O)[C@H](O)[C@H](O)[C@H](O)CO	L6000-Targetmol-Natural Compound Library-1680cpds	0.488
COc1cccc(OC)c1C(=O)O	L6000-Targetmol-Natural Compound Library-1680cpds	0.53211
COc1ccc(/C=C/C(=O)O)cc1OC	L6000-Targetmol-Natural Compound Library-1680cpds	0.525843
COc1ccc(O)c(C(C)=O)c1	L6000-Targetmol-Natural Compound Library-1680cpds	0.533333
CCCCCCCCCCCCCCCCCCCCCCCCCCCCO	L6000-Targetmol-Natural Compound Library-1680cpds	0.34375
COc1cc(-c2coc3cc(O[C@@H]4O[C@H](CO)[C@@H](O)[C@H](O)[C@H]4O)c(OC)c(O)c3c2=O)cc(O)c1OC	L6000-Targetmol-Natural Compound Library-1680cpds	0.509879
O=C(O)/C=C/C(=O)O	L6000-Targetmol-Natural Compound Library-1680cpds	0.307087
CC1(C)CC[C@]2(C(=O)O)CC[C@]3(CO)C(=CC[C@@H]4[C@@]5(C)C[C@H](O)[C@H](O[C@@H]6O[C@H](CO)[C@@H](O)[C@H](O)[C@H]6O)[C@@](C)(C(=O)O)[C@@H]5CC[C@]43C)[C@@H]2C1	L6000-Targetmol-Natural Compound Library-1680cpds	0.654779
CO[C@]1(CC[C@@H](C)CO[C@@H]2O[C@H](CO)[C@@H](O)[C@H](O)[C@H]2O)O[C@H]2C[C@H]3[C@@H]4CC=C5C[C@@H](O[C@@H]6O[C@H](CO)[C@H](O[C@@H]7O[C@@H](C)[C@H](O)[C@@H](O)[C@H]7O)[C@H](O)[C@H]6O[C@@H]6O[C@@H](C)[C@H](O)[C@@H](O)[C@H]6O)CC[C@]5(C)[C@H]4CC[C@]3(C)C2[C@@H]1C	L6000-Targetmol-Natural Compound Library-1680cpds	0.553571
CC1(C)CC[C@]2(C(=O)O)CC[C@]3(C)C(=CC[C@@H]4[C@@]5(C)C[C@@H](O)[C@H](O)C(C)(C)[C@@H]5CC[C@]43C)[C@@H]2C1	L6000-Targetmol-Natural Compound Library-1680cpds	0.796334
C[C@@]12C[C@@]3(O)O[C@@H](O1)[C@]1(COC(=O)c4ccc(O)cc4)[C@H]3C[C@]21O[C@@H]1O[C@H](CO)[C@@H](O)[C@H](O)[C@H]1O	L6000-Targetmol-Natural Compound Library-1680cpds	0.471006
C[C@@H]1O[C@@H](O[C@@H]2[C@@H](O[C@@H]3O[C@H](CO)[C@@H](O)[C@H](O)[C@H]3O)[C@H](O)[C@@H](CO)O[C@H]2O[C@H]2CC[C@@]3(C)C(=CC[C@H]4[C@@H]5C[C@@H]6O[C@]7(CC[C@@H](C)CO7)[C@@H](C)C6[C@@]5(C)CC[C@@H]43)C2)[C@H](O)[C@H](O)[C@H]1O	L6000-Targetmol-Natural Compound Library-1680cpds	0.551913
COc1ccc(/C=C/c2cc(O)cc(O)c2)cc1O	L6000-Targetmol-Natural Compound Library-1680cpds	0.474926
C/C=C(/C)C(=O)O[C@H]1[C@@H](OC(C)=O)c2c(ccc3ccc(=O)oc23)OC1(C)C	L6000-Targetmol-Natural Compound Library-1680cpds	0.576514
O=c1c(-c2ccc(O)c(O)c2)coc2c([C@@H]3O[C@H](CO)[C@@H](O)[C@H](O)[C@H]3O)c(O)ccc12	L6000-Targetmol-Natural Compound Library-1680cpds	0.56914
CC(/C=C/C=C(\C)C(=O)O[C@@H]1O[C@H](CO)[C@@H](O)[C@H](O)[C@H]1O)=C\C=C\C=C(C)\C=C\C=C(/C)C(=O)O[C@@H]1O[C@H](CO[C@@H]2O[C@H](CO)[C@@H](O)[C@H](O)[C@H]2O)[C@@H](O)[C@@H](O)[C@H]1O	L6000-Targetmol-Natural Compound Library-1680cpds	0.5
O=c1cc(-c2ccccc2)oc2cc(O[C@@H]3O[C@H](CO[C@@H]4O[C@H](CO)[C@@H](O)[C@H](O)[C@H]4O)[C@@H](O)[C@H](O)[C@H]3O)c(O)c(O)c12	L6000-Targetmol-Natural Compound Library-1680cpds	0.500273
COc1cc2ccc(=O)oc2c(O[C@@H]2O[C@H](CO)[C@@H](O)[C@@H](O)[C@H]2O)c1O	L6000-Targetmol-Natural Compound Library-1680cpds	0.450113
N#C/C=C1/C=C[C@@H](O)[C@H](O)[C@H]1O[C@@H]1O[C@H](CO)[C@@H](O)[C@H](O)[C@H]1O	L6000-Targetmol-Natural Compound Library-1680cpds	0.415144
COc1ccc([C@@H]2CC(=O)c3c(O)cc(O[C@@H]4O[C@H](CO[C@@H]5O[C@@H](C)[C@H](O)[C@@H](O)[C@H]5O)[C@@H](O)[C@H](O)[C@H]4O)cc3O2)cc1	L6000-Targetmol-Natural Compound Library-1680cpds	0.606941
C[C@]1(O)C[C@@H](O)[C@@H]2C=CO[C@@H](O[C@@H]3O[C@H](CO)[C@@H](O)[C@H](O)[C@H]3O)C21	L6000-Targetmol-Natural Compound Library-1680cpds	0.457447
CC(C)=CCC[C@@](C)(O)C1CC[C@]2(C)C1[C@H](O)C[C@@H]1[C@@]3(C)CC[C@H](O)C(C)(C)[C@@H]3[C@@H](O[C@@H]3O[C@H](CO)[C@@H](O)[C@H](O)[C@H]3O)C[C@]12C	L6000-Targetmol-Natural Compound Library-1680cpds	0.537202
O=C(OC[C@H]1O[C@@H](OC(=O)c2cc(O)c(O)c(O)c2)[C@H](OC(=O)c2cc(O)c(O)c(O)c2)[C@@H](OC(=O)c2cc(O)c(O)c(O)c2)[C@@H]1OC(=O)c1cc(O)c(O)c(O)c1)c1cc(O)c(O)c(O)c1	L6000-Targetmol-Natural Compound Library-1680cpds	0.4214
O=C(O[C@H]1O[C@H]2COC(=O)c3cc(O)c(O)c(O)c3-c3c(cc(O)c(O)c3O)C(=O)O[C@H]([C@H]2O)[C@@H]1O)c1cc(O)c(O)c(O)c1	L6000-Targetmol-Natural Compound Library-1680cpds	0.492834
C=C(C)[C@@H]1CC[C@]2(C=O)CC[C@]3(C)[C@H](CC[C@@H]4[C@@]5(C)CC[C@H](O)C(C)(C)[C@@H]5CC[C@]43C)C12	L6000-Targetmol-Natural Compound Library-1680cpds	0.650138
COc1cc(C2Oc3ccc(C4Oc5cc(O)cc(O)c5C(=O)C4O)cc3OC2CO)ccc1O	L6000-Targetmol-Natural Compound Library-1680cpds	0.632294
C[C@@H]1CC[C@]2(C(=O)O[C@@H]3O[C@H](CO)[C@@H](O)[C@H](O)[C@H]3O)CC[C@]3(C)C(=CC[C@@H]4[C@@]5(C)CC[C@H](O[C@@H]6OC[C@H](O)[C@H](O)[C@H]6O)C(C)(C)[C@@H]5CC[C@]43C)[C@@H]2[C@]1(C)O	L6000-Targetmol-Natural Compound Library-1680cpds	0.663421
COc1cc(-c2oc3cc(O)cc(O)c3c(=O)c2O[C@@H]2O[C@H](CO)[C@@H](O)[C@H](O)[C@H]2O[C@@H]2O[C@@H](C)[C@H](O)[C@@H](O)[C@H]2O)ccc1O	L6000-Targetmol-Natural Compound Library-1680cpds	0.561002
COc1cc(-c2oc3cc(O)cc(O)c3c(=O)c2O[C@@H]2O[C@H](CO[C@@H]3O[C@@H](C)[C@H](O)[C@@H](O)[C@H]3O)[C@@H](O)[C@H](O)[C@H]2O[C@H]2O[C@H](C)[C@H](O)[C@@H](O)[C@H]2O)ccc1O	L6000-Targetmol-Natural Compound Library-1680cpds	0.561002
C/C=C1\C(CC(=O)OC[C@H]2O[C@@H](OCCc3ccc(O)cc3)[C@H](O)[C@@H](O)[C@@H]2O)C(C(=O)OC)=CO[C@H]1O[C@@H]1O[C@H](CO)[C@@H](O)[C@H](O)[C@H]1O	L6000-Targetmol-Natural Compound Library-1680cpds	0.467136
O=c1c2cc(O[C@@H]3O[C@H](CO)[C@@H](O)[C@H](O)[C@H]3O)c(O)cc2oc2cc(O)c([C@@H]3O[C@H](CO)[C@@H](O)[C@H](O)[C@H]3O)c(O)c12	L6000-Targetmol-Natural Compound Library-1680cpds	0.568763
COc1c2c(cc3oc(CO[C@@H]4O[C@H](CO)[C@@H](O)[C@H](O)[C@H]4O)cc(=O)c13)O[C@H](C(C)(C)O)C2	L6000-Targetmol-Natural Compound Library-1680cpds	0.564795
COc1ccc(-c2oc3cc(O)cc(O)c3c(=O)c2O)cc1	L6000-Targetmol-Natural Compound Library-1680cpds	0.400713
O=C(O[C@@H]1Cc2c(O)cc(O)cc2O[C@H]1c1cc(O)c(O)c(O)c1)c1cc(O)c(O)c(O)c1	L6000-Targetmol-Natural Compound Library-1680cpds	0.558506
C[C@H]1CC[C@@]2(OC1)O[C@H]1C[C@H]3[C@@H]4CC=C5C[C@@H](O[C@@H]6O[C@H](CO)[C@@H](O)[C@H](O[C@@H]7OC[C@@H](O)[C@H](O)[C@H]7O)[C@H]6O[C@@H]6O[C@@H](C)[C@H](O)[C@@H](O)[C@H]6O)CC[C@]5(C)[C@H]4CC[C@]3(C)C1[C@@H]2C	L6000-Targetmol-Natural Compound Library-1680cpds	0.551913
C[C@H]1O[C@@H](O[C@H]2CC[C@@]3(C)[C@@H](CC[C@]4(C)[C@@H]3C=CC3=C5CC(C)(C)CC[C@]5(CO)[C@H](O)C[C@]34C)[C@]2(C)CO)[C@H](O)[C@@H](O[C@@H]2O[C@H](CO)[C@@H](O)[C@H](O)[C@H]2O)[C@H]1O	L6000-Targetmol-Natural Compound Library-1680cpds	0.573171
CC(C)=CCC[C@](C)(O[C@@H]1O[C@H](CO)[C@@H](O)[C@H](O)[C@H]1O)[C@H]1CC[C@]2(C)C1[C@H](O)C[C@@H]1[C@@]3(C)CC[C@H](O)C(C)(C)[C@@H]3CC[C@]12C	L6000-Targetmol-Natural Compound Library-1680cpds	0.543446
CC(C)=CCC[C@@](C)(O)C1CC[C@]2(C)C1[C@H](O)C[C@@H]1[C@@]3(C)CC[C@H](O[C@@H]4O[C@H](CO)[C@@H](O)[C@H](O)[C@H]4O[C@@H]4O[C@H](CO)[C@@H](O)[C@H](O)[C@H]4O)C(C)(C)[C@@H]3CC[C@]12C	L6000-Targetmol-Natural Compound Library-1680cpds	0.541364
CC(C)=CCC[C@@](C)(O)[C@H]1CC[C@]2(C)C1[C@H](O)C[C@@H]1[C@@]3(C)CC[C@H](O[C@@H]4O[C@H](CO)[C@@H](O)[C@H](O)[C@H]4O)C(C)(C)[C@@H]3CC[C@]12C	L6000-Targetmol-Natural Compound Library-1680cpds	0.542348
COc1cc(/C=C/c2cc(O)cc(O)c2)ccc1O	L6000-Targetmol-Natural Compound Library-1680cpds	0.485459
COc1cc2oc(=O)ccc2cc1O	L6000-Targetmol-Natural Compound Library-1680cpds	0.393971
CC(=O)O[C@H]1CC[C@@]2(C)[C@@H](CC[C@]3(C)[C@@H]2CC=C2[C@@H]4[C@@H](C)[C@H](C)CC[C@]4(C(=O)O)CC[C@]23C)C1(C)C	L6000-Targetmol-Natural Compound Library-1680cpds	0.894212
CO[C@@H]1[C@@H](O)[C@@H](O)[C@H](O)[C@H](O)[C@H]1O	L6000-Targetmol-Natural Compound Library-1680cpds	0.482906
Oc1cc(O)c2c(c1)O[C@@H](c1cc(O)c(O)c(O)c1)[C@H](O)C2	L6000-Targetmol-Natural Compound Library-1680cpds	0.579096
CC(C)=CCc1cc2c(cc1O)O[C@H](c1ccc(O)cc1)CC2=O	L6000-Targetmol-Natural Compound Library-1680cpds	0.704612
CC(=O)OCC1=C[C@@H]2OC(=O)C3=CO[C@@H](O[C@@H]4O[C@H](CO)[C@@H](O)[C@H](O)[C@H]4O)[C@H]1[C@@H]32	L6000-Targetmol-Natural Compound Library-1680cpds	0.517647
COc1ccc(C[C@H]2COC(=O)[C@]2(O)Cc2ccc(O[C@@H]3O[C@H](CO)[C@@H](O)[C@H](O)[C@H]3O)c(OC)c2)cc1OC	L6000-Targetmol-Natural Compound Library-1680cpds	0.476725
COc1ccc([C@H]2OC[C@@H]3[C@@H](c4cc(OC)c(OC)c(OC)c4)OC[C@H]23)cc1OC	L6000-Targetmol-Natural Compound Library-1680cpds	0.399142
CC(C)=CCc1c(O)ccc(C(=O)/C=C/c2ccc(O)cc2)c1O	L6000-Targetmol-Natural Compound Library-1680cpds	0.680992
CC1(C)CC[C@]2(C(=O)O[C@@H]3O[C@H](CO)[C@@H](O)[C@H](O)[C@H]3O)CC[C@]3(C)C(=CC[C@@H]4[C@@]5(C)CC[C@H](O[C@@H]6O[C@H](C(=O)O)[C@@H](O)[C@H](O)[C@H]6O)C(C)(C)[C@@H]5CC[C@]43C)[C@@H]2C1	L6000-Targetmol-Natural Compound Library-1680cpds	0.680339
COc1ccc(CCc2cc(OC)c(OC)c(OC)c2)cc1O	L6000-Targetmol-Natural Compound Library-1680cpds	0.563953
COc1cc(C[C@H](C)[C@H](C)Cc2ccc3c(c2)OCO3)ccc1O	L6000-Targetmol-Natural Compound Library-1680cpds	0.421277
COc1cc(O)cc2c1C(=O)C[C@@H](c1ccccc1)O2	L6000-Targetmol-Natural Compound Library-1680cpds	0.735789
O=c1ccc2ccc(O[C@@H]3O[C@H](CO)[C@@H](O)[C@H](O)[C@H]3O)cc2o1	L6000-Targetmol-Natural Compound Library-1680cpds	0.415025
C[C@@H]1C(=O)O[C@H](C)[C@H]1C[C@@H](O)[C@](C)(O)[C@H]1CC[C@@]2(O)C3=CC(=O)[C@@H]4C[C@@H](O)[C@@H](O)C[C@]4(C)[C@H]3CC[C@]12C	L6000-Targetmol-Natural Compound Library-1680cpds	0.625364
CC[C@H](CC[C@@H](C)[C@H]1CC[C@H]2[C@@H]3CC=C4C[C@@H](O[C@@H]5O[C@H](CO)[C@@H](O)[C@H](O)[C@H]5O)CC[C@]4(C)[C@H]3CC[C@@]21C)C(C)C	L6000-Targetmol-Natural Compound Library-1680cpds	0.5727
CC(C)(O[C@@H]1O[C@H](CO)[C@@H](O)[C@H](O)[C@H]1O)[C@H]1Cc2cc3ccc(=O)oc3cc2O1	L6000-Targetmol-Natural Compound Library-1680cpds	0.47333
O=C1C=C2C=C[C@@H](O)[C@H](O)[C@H]2O1	L6000-Targetmol-Natural Compound Library-1680cpds	0.474346
C[C@H]1C2[C@H](C[C@H]3[C@@H]4CC=C5C[C@@H](O[C@@H]6O[C@H](CO)[C@@H](O)[C@H](O)[C@H]6O)CC[C@]5(C)[C@H]4CC[C@]23C)O[C@]12CC[C@@H](C)CO2	L6000-Targetmol-Natural Compound Library-1680cpds	0.561972
COc1cc(OC)c(CCC(=O)c2ccc(O)cc2)c(OC)c1	L6000-Targetmol-Natural Compound Library-1680cpds	0.498534
COC(=O)[C@@]1(C)CC[C@]2(C(=O)O)CC[C@]3(C)C(=CC[C@@H]4[C@@]5(C)C[C@H](O)[C@H](O[C@@H]6OC[C@@H](O[C@@H]7O[C@H](CO)[C@@H](O)[C@H](O)[C@H]7O)[C@H](O)[C@H]6O)[C@@](C)(CO)[C@@H]5CC[C@]43C)[C@@H]2C1	L6000-Targetmol-Natural Compound Library-1680cpds	0.687126
O=c1cc(-c2ccc(O[C@@H]3O[C@H](CO)[C@@H](O)[C@H](O)[C@H]3O)cc2)oc2cc(O)c([C@@H]3O[C@H](CO)[C@@H](O)[C@H](O)[C@H]3O[C@@H]3OC[C@H](O)[C@H](O)[C@H]3O)c(O)c12	L6000-Targetmol-Natural Compound Library-1680cpds	0.60169
O=c1cc(-c2ccc(O)cc2)oc2c(C3O[C@H](CO)[C@@H](O[C@@H]4O[C@H](CO)[C@@H](O)[C@H](O)[C@H]4O)[C@H](O)[C@H]3O)c(O)cc(O)c12	L6000-Targetmol-Natural Compound Library-1680cpds	0.606204
C=C(C)[C@@H]1CC[C@]2(C)[C@H](CC=C3[C@@H]4[C@@H](C)[C@H](C)CC[C@]4(C)CC[C@]32C)[C@@]1(C)CCC(=O)O	L6000-Targetmol-Natural Compound Library-1680cpds	0.676056
C=C1CC[C@H]2[C@@](C)(CCC[C@@]2(C)CO[C@@H]2O[C@H](CO)[C@@H](O)[C@H](O)[C@H]2O)[C@@H]1CCC1=CCOC1=O	L6000-Targetmol-Natural Compound Library-1680cpds	0.559823
O[C@H]1CO[C@@H](OC[C@H]2O[C@@H](OC/C=C/c3ccccc3)[C@H](O)[C@@H](O)[C@@H]2O)[C@H](O)[C@H]1O	L6000-Targetmol-Natural Compound Library-1680cpds	0.403046
COc1cc2ccc(=O)oc2cc1O[C@@H]1O[C@H](CO)[C@@H](O)[C@H](O)[C@H]1O	L6000-Targetmol-Natural Compound Library-1680cpds	0.420188
COC(=O)C1=CO[C@@H](O[C@@H]2O[C@H](CO)[C@@H](O)[C@H](O)[C@H]2O)C2[C@@H](C)CC(=O)[C@H]12	L6000-Targetmol-Natural Compound Library-1680cpds	0.509901
C[C@@H]1O[C@@H](O[C@H]2[C@H](O)[C@@H](COC(=O)/C=C/c3ccc(O)c(O)c3)O[C@@H](OCCc3ccc(O)c(O)c3)[C@@H]2O)[C@H](O)[C@H](O)[C@H]1O	L6000-Targetmol-Natural Compound Library-1680cpds	0.420863
C[C@@H]1O[C@@H](O[C@@H]2[C@@H](O)[C@H](OCCc3ccc(O)c(O)c3)O[C@H](CO[C@@H]3OC[C@](O)(CO)[C@H]3O)[C@H]2OC(=O)/C=C/c2ccc(O)c(O)c2)[C@H](O)[C@H](O)[C@H]1O	L6000-Targetmol-Natural Compound Library-1680cpds	0.44771
C[C@@H]1O[C@@H](O[C@@H]2[C@@H](O)[C@H](O[C@@H]3O[C@@H](CO)[C@H](O)[C@H]3O)[C@@H](CO)O[C@H]2O[C@H]2CC[C@@]3(C)C(=CC[C@H]4[C@@H]5C[C@@H]6O[C@]7(CC[C@@H](C)CO7)[C@@H](C)C6[C@@]5(C)CC[C@@H]43)C2)[C@H](O)[C@H](O)[C@H]1O	L6000-Targetmol-Natural Compound Library-1680cpds	0.554645
COC(=O)C1=CO[C@@H](O[C@@H]2O[C@H](CO)[C@@H](O)[C@H](O)[C@H]2O)C2[C@@H]1[C@H](O)C[C@]2(C)O	L6000-Targetmol-Natural Compound Library-1680cpds	0.523342
Cc1cc(O)c2c(c1)C(=O)c1cc(O)cc(O[C@@H]3O[C@H](CO)[C@@H](O)[C@H](O)[C@H]3O)c1C2=O	L6000-Targetmol-Natural Compound Library-1680cpds	0.481994
C[C@@H]1O[C@@H](O[C@@H]2[C@@H](O[C@@H]3O[C@H](CO)[C@@H](O)[C@H](O)[C@H]3O)[C@@H](O)[C@@H](CO)O[C@H]2O[C@H]2CC[C@@]3(C)C(=CC[C@H]4[C@@H]5C[C@@H]6O[C@]7(CC[C@@H](C)CN7)[C@@H](C)C6[C@@]5(C)CC[C@@H]43)C2)[C@H](O)[C@H](O)[C@H]1O	L6000-Targetmol-Natural Compound Library-1680cpds	0.516867
C=C1CCC[C@]2(C)C[C@]3(O)OC(=O)C(C)=C3C[C@@H]12	L6000-Targetmol-Natural Compound Library-1680cpds	0.567989
COc1ccc(CCO[C@@H]2O[C@H](CO[C@@H]3OC[C@H](O)[C@H](O)[C@H]3O)[C@@H](OC(=O)/C=C/c3ccc(O)c(OC)c3)[C@H](O[C@@H]3O[C@@H](C)[C@H](O)[C@@H](O)[C@H]3O)[C@H]2O)cc1O	L6000-Targetmol-Natural Compound Library-1680cpds	0.477293
COc1ccc(-c2oc3c(CC=C(C)C)c(O[C@@H]4O[C@H](CO)[C@@H](O)[C@H](O)[C@H]4O)cc(O)c3c(=O)c2O[C@@H]2O[C@@H](C)[C@H](O)[C@@H](O)[C@H]2O[C@@H]2O[C@H](CO)[C@@H](O)[C@H](O)[C@H]2O)cc1	L6000-Targetmol-Natural Compound Library-1680cpds	0.627145
CC1(C)CC[C@]2(C(=O)O)CCC3=C([C@@H](CCl)C[C@H]4[C@@]3(C)CC[C@H]3[C@](C)(C(=O)O)[C@@H](O)[C@@H](O)C[C@@]34C)[C@@H]2C1	L6000-Targetmol-Natural Compound Library-1680cpds	0.705882
CCCCCCCCC[C@H](O)CC(=O)CCc1ccc(O)c(OC)c1	L6000-Targetmol-Natural Compound Library-1680cpds	0.403047
C[C@@H]1O[C@@H](O[C@@H]2[C@@H](CO[C@@H]3O[C@H](CO)[C@@H](O)[C@H](O)[C@H]3O)O[C@@H](O[C@H]3CC[C@@]4(C)[C@@H](CC[C@]5(C)[C@@H]4C=C[C@]46OC[C@@]7(CCC(C)(C)C[C@H]74)[C@@H](O)C[C@]65C)C3(C)C)[C@H](O)[C@H]2O)[C@H](O)[C@H](O)[C@H]1O	L6000-Targetmol-Natural Compound Library-1680cpds	0.535172
CC1(C)CC[C@]2(C(=O)O[C@@H]3O[C@H](CO)[C@@H](O)[C@H](O)[C@H]3O)CC[C@]3(C)C(=CC[C@@H]4[C@@]5(C)CC[C@H](O[C@@H]6O[C@H](C(=O)O)[C@@H](O)[C@H](O)[C@H]6O[C@@H]6O[C@H](CO)[C@@H](O)[C@H](O)[C@H]6O)C(C)(C)[C@@H]5CC[C@]43C)[C@@H]2C1	L6000-Targetmol-Natural Compound Library-1680cpds	0.665284
CC(C)=CCC[C@](C)(O[C@@H]1O[C@H](CO)[C@@H](O)[C@H](O)[C@H]1O)C1CC[C@]2(C)C1[C@H](O)C[C@@H]1[C@@]3(C)CC[C@H](O[C@@H]4O[C@H](CO)[C@@H](O)[C@H](O)[C@H]4O)C(C)(C)[C@@H]3CC[C@]12C	L6000-Targetmol-Natural Compound Library-1680cpds	0.55
C[C@@H]1O[C@@H](O[C@@H]2[C@@H](O)[C@H](O)[C@@H](CO)O[C@H]2O[C@H]2C[C@]3(C)[C@H](C[C@@H](O)C4C([C@]5(C)CC[C@H](C(C)(C)O)O5)CC[C@]43C)[C@@]3(C)CC[C@H](O)C(C)(C)[C@H]23)[C@H](O)[C@H](O)[C@H]1O	L6000-Targetmol-Natural Compound Library-1680cpds	0.493927
CC(=O)O[C@H]1[C@H](O[C@H]2CC[C@]34CC35CC[C@]3(C)C([C@@]6(C)CC[C@@H](C(C)(C)O)O6)[C@@H](O)C[C@@]3(C)[C@@H]5C[C@H](O[C@@H]3O[C@H](CO)[C@@H](O)[C@H](O)[C@H]3O)[C@H]4C2(C)C)OC[C@@H](O)[C@@H]1O	L6000-Targetmol-Natural Compound Library-1680cpds	0.493094
CC(=O)O[C@H]1[C@H](O)CO[C@@H](O[C@H]2CC[C@]34C[C@]35CC[C@]3(C)C([C@@]6(C)CC[C@@H](C(C)(C)O)O6)[C@@H](O)C[C@@]3(C)[C@@H]5C[C@H](O[C@@H]3O[C@H](CO)[C@@H](O)[C@H](O)[C@H]3O)[C@H]4C2(C)C)[C@@H]1OC(C)=O	L6000-Targetmol-Natural Compound Library-1680cpds	0.491826
CC(C)=CCc1c(O)ccc2c1O[C@H](c1ccc(O)cc1)CC2=O	L6000-Targetmol-Natural Compound Library-1680cpds	0.688152
COc1cc2c(cc1O)CC[n+]1cc3c(OC)c(OC)ccc3cc1-2	L6000-Targetmol-Natural Compound Library-1680cpds	0.503192
CCCCCCCCCCCCCC(=O)O	L6000-Targetmol-Natural Compound Library-1680cpds	0.36
COc1ccc(-c2cc(=O)c3c(O)cc(O)cc3o2)cc1	L6000-Targetmol-Natural Compound Library-1680cpds	0.371859
C[C@@H]1O[C@@H](O[C@@H]2[C@@H](CO)O[C@@H](O[C@H]3CC[C@@]4(C)C(=CC[C@H]5[C@@H]6C[C@@H]7O[C@@]8(CC[C@@H](C)CN8)[C@@H](C)C7[C@@]6(C)CC[C@@H]54)C3)[C@H](O)[C@H]2O)[C@H](O)[C@H](O)[C@H]1O	L6000-Targetmol-Natural Compound Library-1680cpds	0.518879
C[C@H]1C2[C@H](C[C@H]3[C@@H]4CC=C5C[C@@H](O)CC[C@]5(C)[C@H]4CC[C@]23C)O[C@]12CC[C@@H](C)CN2	L6000-Targetmol-Natural Compound Library-1680cpds	0.540802
CC1=C[C@H]2[C@]3(O)[C@@H](C=C(CO)C[C@]2(O)C1=O)[C@@H]1C(C)(C)[C@]1(O)[C@H](O)[C@H]3C	L6000-Targetmol-Natural Compound Library-1680cpds	0.519621
CC1=N[C@H](C(=O)O)CCN1	L6000-Targetmol-Natural Compound Library-1680cpds	0.449799
COc1cc(C(=O)OCCCCNC(=N)N)cc(OC)c1O.Cl	L6000-Targetmol-Natural Compound Library-1680cpds	0.443337
CC1=CC(=O)C(C(C)C)=CC1=O	L6000-Targetmol-Natural Compound Library-1680cpds	0.403553
COc1cc(C)c(C(=O)Oc2cc(C)c(C(=O)O)c(O)c2C)c(OC)c1C	L6000-Targetmol-Natural Compound Library-1680cpds	0.396357
CC(C)=CCC/C(C)=C/COc1ccc2ccc(=O)oc2c1	L6000-Targetmol-Natural Compound Library-1680cpds	0.412004
COc1cc(O)c2c(=O)c(O[C@@H]3O[C@H](CO)[C@@H](O)[C@H](O)[C@H]3O)c(-c3ccc(O[C@@H]4O[C@H](CO)[C@@H](O)[C@H](O)[C@H]4O)cc3)oc2c1	L6000-Targetmol-Natural Compound Library-1680cpds	0.538046
CC(C)=CCC1=C(O)C(=O)c2ccccc2C1=O	L6000-Targetmol-Natural Compound Library-1680cpds	0.383777
O=c1cc(O)c2ccc(O)cc2o1	L6000-Targetmol-Natural Compound Library-1680cpds	0.342561
C=CC1CN2CCC1CC2C(O)c1ccnc2ccc(OC)cc12.Cl.Cl	L6000-Targetmol-Natural Compound Library-1680cpds	0.445563
COC(=O)C=Cc1ccc(OC)c(O)c1	L6000-Targetmol-Natural Compound Library-1680cpds	0.530474
CC1=CC(=O)C=C(C)C1=O	L6000-Targetmol-Natural Compound Library-1680cpds	0.47012
COC(=O)[C@@H]1[C@@H](O)CC[C@@H]2CN3CCc4c([nH]c5ccccc45)[C@@H]3C[C@@H]21.Cl	L6000-Targetmol-Natural Compound Library-1680cpds	0.525739
COc1ccc(CC2NCCc3cc(OC)c(OC)cc32)cc1OC.Cl	L6000-Targetmol-Natural Compound Library-1680cpds	0.412724
C[C@H]1CCC/C=C/[C@@H]2C[C@H](O)C[C@H]2[C@H](O)/C=C/C(=O)O1	L6000-Targetmol-Natural Compound Library-1680cpds	0.496491
CC(C)=CCCC1(C)C=Cc2c(O)c3c(c(CC=C(C)C)c2O1)O[C@]12C(=C[C@@H]4CC1C(C)(C)OC2(C/C=C(\C)C(=O)O)C4=O)C3=O	L6000-Targetmol-Natural Compound Library-1680cpds	0.668378
COc1ccc(/C=C\c2cc(OC)c(OC)c(OC)c2)cc1O	L6000-Targetmol-Natural Compound Library-1680cpds	0.522124
CCC1=C[C@@H]2CN(C1)Cc1c([nH]c3ccccc13)[C@@](C(=O)OC)(c1cc3c(cc1OC)N(C)[C@H]1[C@@](O)(C(=O)OC)[C@H](OC(C)=O)[C@]4(CC)C=CCN5CC[C@]31[C@@H]54)C2.O=C(O)[C@H](O)[C@@H](O)C(=O)O.O=C(O)[C@H](O)[C@@H](O)C(=O)O	L6000-Targetmol-Natural Compound Library-1680cpds	0.765989
CCc1c2c(nc3ccc(OC(=O)N4CCC(N5CCCCC5)CC4)cc13)-c1cc3c(c(=O)n1C2)COC(=O)[C@]3(O)CC	L6000-Targetmol-Natural Compound Library-1680cpds	0.683917
COc1ccc(/C=C\c2cc(OC)c(OC)c(OC)c2)cc1OP(=O)([O-])[O-].[Na+].[Na+]	L6000-Targetmol-Natural Compound Library-1680cpds	0.44021
C=C1/C(=C\C=C2/CCC[C@@]3(C)[C@H]2CC[C@@H]3[C@H](C)CCCC(C)(C)O)C[C@@H](O)C[C@@H]1O	L6000-Targetmol-Natural Compound Library-1680cpds	0.473064
COC1=C2C[C@@H](C)C[C@H](OC)[C@H](O)[C@@H](C)/C=C(\C)[C@H](OC(N)=O)[C@@H](OC)/C=C/C=C(/C)C(=O)NC(=CC1=O)C2=O	L6000-Targetmol-Natural Compound Library-1680cpds	0.489256
CC(=O)C1=C(O)[C@]2(C)C(=CC1=O)Oc1c(C(C)=O)c(O)c(C)c(O)c12	L6000-Targetmol-Natural Compound Library-1680cpds	0.558127
O=C(O)CCCc1c[nH]c2ccccc12	L6000-Targetmol-Natural Compound Library-1680cpds	0.447482
C1=C2CCCN[C@H]2[C@@H]2C[C@H]1[C@H]1CCCCN1C2	L6000-Targetmol-Natural Compound Library-1680cpds	0.461627
CC1(C)[C@@H](O[C@H]2O[C@H](C(=O)O)[C@@H](O)[C@H](O)[C@H]2O[C@H]2O[C@H](C(=O)O)[C@@H](O)[C@H](O)[C@H]2O)CC[C@@]2(C)[C@H]1CC[C@]1(C)[C@@H]2C(=O)C=C2[C@@H]3C[C@@](C)(C(=O)O)CC[C@]3(C)CC[C@]21C.N	L6000-Targetmol-Natural Compound Library-1680cpds	0.604054
CCCCCCCCCCCCCCCc1cccc(O)c1C(=O)O	L6000-Targetmol-Natural Compound Library-1680cpds	0.436111
COc1cc(C(C)=O)ccc1O	L6000-Targetmol-Natural Compound Library-1680cpds	0.573574
CC(C)(O)[C@H]1CC[C@@](C)(C2[C@H](O)C[C@]3(C)[C@H]4C[C@@H](O[C@H]5O[C@@H](CO)[C@H](O)[C@@H](O)[C@@H]5O)[C@@H]5C(C)(C)[C@H](O[C@H]6OC[C@H](O)[C@@H](O)[C@@H]6O)CC[C@]56C[C@]46CC[C@@]23C)O1	L6000-Targetmol-Natural Compound Library-1680cpds	0.468175
O=C(/C=C/c1ccc(O)c(O)c1)c1ccc(O)cc1O	L6000-Targetmol-Natural Compound Library-1680cpds	0.597643
O=C(/C=C/c1ccc(O)c(O)c1)OCCc1ccccc1	L6000-Targetmol-Natural Compound Library-1680cpds	0.544248
Nc1nc(=O)c2c([nH]1)NC[C@H](CNc1ccc(C(=O)N[C@@H](CCC(=O)[O-])C(=O)[O-])cc1)N2C=O.[Ca+2]	L6000-Targetmol-Natural Compound Library-1680cpds	0.526695
CCC[C@@H]1C[C@@H](C(=O)N[C@H]([C@H](C)Cl)[C@H]2O[C@H](SC)[C@H](O)[C@@H](O)[C@H]2O)N(C)C1	L6000-Targetmol-Natural Compound Library-1680cpds	0.470033
Oc1ccc(OC2CCCCO2)cc1	L6000-Targetmol-Natural Compound Library-1680cpds	0.474273
NC(=O)CC[C@@H](N)C(=O)O	L6000-Targetmol-Natural Compound Library-1680cpds	0.408163
C[C@H]1CC[C@]2(OC1)O[C@H]1C[C@H]3[C@@H]4CC=C5C[C@@H](O[C@@H]6O[C@H](CO)[C@@H](O[C@@H]7O[C@@H](C)[C@H](O)[C@@H](O)[C@H]7O)[C@H](O)[C@H]6O[C@@H]6O[C@@H](C)[C@H](O)[C@@H](O)[C@H]6O)CC[C@]5(C)[C@H]4CC[C@]3(C)C1[C@@H]2C	L6000-Targetmol-Natural Compound Library-1680cpds	0.552055
CCCCCCCCCCCC1=C(O)C(=O)C=C(O)C1=O	L6000-Targetmol-Natural Compound Library-1680cpds	0.375924
Oc1ccc([C@H]2COc3cc(O)ccc3C2)cc1	L6000-Targetmol-Natural Compound Library-1680cpds	0.499358
CNC1[C@H](O)[C@@H](OC2[C@H](N)CC(N)[C@@H](O[C@H]3OC(C(C)O)[C@@H](O)[C@@H](O)C3N)[C@H]2O)OC[C@]1(C)O.O=S(=O)(O)O.O=S(=O)(O)O	L6000-Targetmol-Natural Compound Library-1680cpds	0.404551
Cc1cc2c(C(C)C)c(O)c(O)c(C=O)c2c(O)c1-c1c(C)cc2c(C(C)C)c(O)c(O)c(C=O)c2c1O	L6000-Targetmol-Natural Compound Library-1680cpds	0.402187
CN(C)Cc1c[nH]c2ccccc12	L6000-Targetmol-Natural Compound Library-1680cpds	0.428139
Cc1cc(O)c([C@@H]2c3c(O)cc(O)cc3O[C@H](c3ccc(O)c(O)c3)[C@H]2O)c2c1C[C@@](C)(O)[C@@H](c1ccc(O)c(O)c1)O2	L6000-Targetmol-Natural Compound Library-1680cpds	0.512838
Nc1nc2c(ncn2[C@@H]2O[C@H](CO)[C@@H](O)[C@H]2O)c(=O)[nH]1	L6000-Targetmol-Natural Compound Library-1680cpds	0.539281
CC(C)=CCC[C@](C)(O[C@@H]1O[C@H](CO[C@@H]2OC[C@@H](O)[C@H](O)[C@H]2O)[C@@H](O)[C@H](O)[C@H]1O)C1CC[C@]2(C)[C@@H]1[C@H](O)C[C@@H]1[C@@]3(C)CC[C@H](O[C@@H]4O[C@H](CO)[C@@H](O)[C@H](O)[C@H]4O)C(C)(C)[C@@H]3CC[C@]12C	L6000-Targetmol-Natural Compound Library-1680cpds	0.547307
Br.CCN1C[C@]2(OC(=O)c3ccccc3NC(C)=O)CC[C@H](OC)[C@]34C1[C@H](C[C@H]23)[C@@]1(O)C[C@H](OC)[C@H]2C[C@@H]4[C@]1(O)[C@H]2OC	L6000-Targetmol-Natural Compound Library-1680cpds	0.515913
N[C@@H](Cn1ccc(=O)c(O)c1)C(=O)O	L6000-Targetmol-Natural Compound Library-1680cpds	0.355705
CNc1ncnc2c1ncn2[C@@H]1O[C@H](CO)[C@@H](O)[C@H]1O	L6000-Targetmol-Natural Compound Library-1680cpds	0.519947
CO[C@H]1CC[C@@H](O[C@H]2CC([C@]3(C)CC[C@]4(C[C@H](O)[C@@H](C)C([C@@H](C)/C=C(\C)C(=O)[C@H](C)C[C@H](C)C(=O)O)O4)O3)O[C@]3(O[C@@H](C4O[C@@](O)(CO)[C@H](C)C[C@@H]4C)C[C@@H]3C)[C@@H]2C)O[C@@H]1C	L6000-Targetmol-Natural Compound Library-1680cpds	0.501282
O.O.O=c1c(O)c(-c2ccc(O)c(O)c2)oc2cc(O)cc(O)c12	L6000-Targetmol-Natural Compound Library-1680cpds	0.400235
O=C1O[C@H]([C@@H](O)CO)C(O)C1O.[Na]	L6000-Targetmol-Natural Compound Library-1680cpds	0.506986
CNCC(O)c1ccc(O)cc1.Cl	L6000-Targetmol-Natural Compound Library-1680cpds	0.474684
COc1cc(C=O)ccc1O	L6000-Targetmol-Natural Compound Library-1680cpds	0.498433
COc1cc(CCC(C)=O)ccc1O	L6000-Targetmol-Natural Compound Library-1680cpds	0.555224
OCC(CO)N[C@H]1C[C@](O)(CO)[C@@H](O)[C@H](O)[C@H]1O	L6000-Targetmol-Natural Compound Library-1680cpds	0.396875
COc1ccc(C[C@H]2NC[C@H](O)[C@H]2OC(C)=O)cc1	L6000-Targetmol-Natural Compound Library-1680cpds	0.37766
O=c1c(Cc2ccc(O)cc2)nc2c(Cc3ccccc3)[nH]c(-c3ccc(O)cc3)cn1-2	L6000-Targetmol-Natural Compound Library-1680cpds	0.519037
COc1cc2c(cc1OC)[C@@H]1C(=O)c3ccc4c(c3O[C@@H]1CO2)C=CC(C)(C)O4	L6000-Targetmol-Natural Compound Library-1680cpds	0.552039
O=C1Nc2ccccc2C1=O	L6000-Targetmol-Natural Compound Library-1680cpds	0.494
O=C(O)c1cc(=O)c2ccccc2[nH]1	L6000-Targetmol-Natural Compound Library-1680cpds	0.43237
CCCCCCCCCCCC(=O)O	L6000-Targetmol-Natural Compound Library-1680cpds	0.36
C/C=C1/[C@H](O[C@@H]2O[C@H](CO)[C@@H](O)[C@H](O)[C@H]2O)OC=C(C(=O)OC)[C@H]1CC(=O)OCCc1ccc(O)c(O)c1	L6000-Targetmol-Natural Compound Library-1680cpds	0.457647
CCCCCCCCCCCCCCCC(=O)NCCO	L6000-Targetmol-Natural Compound Library-1680cpds	0.370213
COc1cc([C@@H]2c3cc4c(cc3[C@H](O)[C@H]3COC(=O)[C@@H]23)OCO4)cc(OC)c1OC	L6000-Targetmol-Natural Compound Library-1680cpds	0.484697
COc1cc(/C=C/C(=O)N2CCC=CC2=O)cc(OC)c1OC	L6000-Targetmol-Natural Compound Library-1680cpds	0.46684
Nc1ncnc2c1ccn2[C@@H]1O[C@H](CO)[C@@H](O)[C@H]1O	L6000-Targetmol-Natural Compound Library-1680cpds	0.507353
O=C(O)c1ccc2c(c1)C(=O)c1ccccc1C2=O	L6000-Targetmol-Natural Compound Library-1680cpds	0.401689
O=C(c1ccc(O)cc1)c1ccccc1O	L6000-Targetmol-Natural Compound Library-1680cpds	0.481069
C=C1CCC=C(C)CCC2C1CC2(C)C	L6000-Targetmol-Natural Compound Library-1680cpds	0.446281
COC(=O)/C=C/c1ccc(O)c(OC)c1	L6000-Targetmol-Natural Compound Library-1680cpds	0.55079
CC1=C(/C=C/C(C)=C/C=C/C(C)=C/CO)C(C)(C)CCC1	L6000-Targetmol-Natural Compound Library-1680cpds	0.481013
O=C1C=CC[C@@H]2[C@H]3CCCN4CCC[C@@H](CN12)[C@@H]34	L6000-Targetmol-Natural Compound Library-1680cpds	0.434964
O[C@H]1[C@H](O)C[C@@H](O)[C@@H](O)[C@@H]1O	L6000-Targetmol-Natural Compound Library-1680cpds	0.329004
C[C@H]1[C@@H](O)CC[C@H]2[C@]1(C)CC[C@@]1(C)[C@@]2(C)CC[C@@]2(C)[C@@H]3CC(C)(C)CC[C@]3(C)CC[C@@]21C	L6000-Targetmol-Natural Compound Library-1680cpds	0.510917
O=C(O)[C@H]1O[C@@H](Oc2cc(O)c3c(=O)cc(-c4ccc(O)c(O)c4)oc3c2)[C@H](O)[C@@H](O)[C@@H]1O	L6000-Targetmol-Natural Compound Library-1680cpds	0.50516
C[C@@H]1O[C@@H](Oc2cc(O)c3c(=O)c(O)c(-c4ccc(O)cc4)oc3c2O)[C@H](O)[C@H](O[C@@H]2O[C@H](CO)[C@@H](O)[C@H](O)[C@H]2O)[C@H]1O	L6000-Targetmol-Natural Compound Library-1680cpds	0.537688
COc1cc(/C=C/C(=O)OC[C@H]2O[C@H](O[C@@]3(CO)O[C@@H](CO)[C@H](O)[C@H]3OC(=O)c3ccc(O)cc3)[C@H](O)[C@@H](O)[C@@H]2O)cc(OC)c1OC	L6000-Targetmol-Natural Compound Library-1680cpds	0.455485
O=C(/C=C/c1ccc(O)c(O)c1)OC[C@H]1O[C@@H](OCCc2ccc(O)c(O)c2)[C@H](O)[C@@H](O)[C@@H]1O	L6000-Targetmol-Natural Compound Library-1680cpds	0.415455
C[C@@H]1O[C@@H](O[C@H]2[C@H](O[C@H]3CC[C@@]4(C)[C@@H](CC[C@]5(C)[C@@H]4CC=C4[C@@H]6CC(C)(C)CC[C@]6(C(=O)O)CC[C@]45C)[C@]3(C)CO)OC[C@H](O[C@@H]3O[C@H](CO)[C@@H](O)[C@H](O)[C@H]3O)[C@@H]2O)[C@H](O)[C@H](O)[C@H]1O	L6000-Targetmol-Natural Compound Library-1680cpds	0.675635
COc1ccc(-c2coc3cc(O)ccc3c2=O)cc1O	L6000-Targetmol-Natural Compound Library-1680cpds	0.382843
COc1cc(C(=O)O)ccc1O	L6000-Targetmol-Natural Compound Library-1680cpds	0.521866
COc1ccc(C(=O)O)c(O)c1	L6000-Targetmol-Natural Compound Library-1680cpds	0.511574
O=C(O)C1CC(O)CN1	L6000-Targetmol-Natural Compound Library-1680cpds	0.371608
NC(CCC(=O)O)C(=O)O	L6000-Targetmol-Natural Compound Library-1680cpds	0.363265
NCCCCC(N)C(=O)O	L6000-Targetmol-Natural Compound Library-1680cpds	0.330612
CCCCCCCCCCCCN1CCCCCC1=O	L6000-Targetmol-Natural Compound Library-1680cpds	0.464567
COc1ccc(C=O)c(O)c1	L6000-Targetmol-Natural Compound Library-1680cpds	0.446483
NC(Cc1cnc[nH]1)C(=O)O	L6000-Targetmol-Natural Compound Library-1680cpds	0.427984
Nc1nc(=O)c2[nH]cnc2[nH]1	L6000-Targetmol-Natural Compound Library-1680cpds	0.392272
CCCCCCCCCCCCCCCCCC(=O)OC	L6000-Targetmol-Natural Compound Library-1680cpds	0.480315
CCCCCCCCC=CCCCCCCCC(=O)OC	L6000-Targetmol-Natural Compound Library-1680cpds	0.390351
CCCCCCCCC=CCCCCCCCC(=O)O	L6000-Targetmol-Natural Compound Library-1680cpds	0.48
O=C(O)C(=O)O	L6000-Targetmol-Natural Compound Library-1680cpds	0.328125
O=C(O)C1CCCN1	L6000-Targetmol-Natural Compound Library-1680cpds	0.474576
Cl.NCCCC(N)C(=O)O	L6000-Targetmol-Natural Compound Library-1680cpds	0.314286
CC(O)C(O)C(O)C(O)C=O	L6000-Targetmol-Natural Compound Library-1680cpds	0.39834
NC(CS)C(=O)O	L6000-Targetmol-Natural Compound Library-1680cpds	0.403226
NCC(=O)O	L6000-Targetmol-Natural Compound Library-1680cpds	0.3125
NC(CO)C(=O)O	L6000-Targetmol-Natural Compound Library-1680cpds	0.33871
NC(CC(=O)O)C(=O)O	L6000-Targetmol-Natural Compound Library-1680cpds	0.325397
NC(CSSCC(N)C(=O)O)C(=O)O	L6000-Targetmol-Natural Compound Library-1680cpds	0.384956
O=c1cc(-c2ccccc2)oc2c1ccc1ccccc12	L6000-Targetmol-Natural Compound Library-1680cpds	0.478439
O=c1cc(CCc2ccccc2)oc2c1C(O)C(O)C(O)C2O	L6000-Targetmol-Natural Compound Library-1680cpds	0.495917
NC(=O)CC(N)C(=O)O	L6000-Targetmol-Natural Compound Library-1680cpds	0.375494
CC(C)C(N)C(=O)O	L6000-Targetmol-Natural Compound Library-1680cpds	0.488
CC(O)C(N)C(=O)O	L6000-Targetmol-Natural Compound Library-1680cpds	0.496063
O=C(O)Cc1c[nH]c2ccccc12	L6000-Targetmol-Natural Compound Library-1680cpds	0.432551
OCC1OC(OC2OC(CO)C(O)C(O)C2O)C(O)C(O)C1O	L6000-Targetmol-Natural Compound Library-1680cpds	0.341811
CCCCCC=CCC=CCCCCCCCC(=O)OC	L6000-Targetmol-Natural Compound Library-1680cpds	0.423581
CC=CC(=O)C1=C(C)C=CCC1(C)C	L6000-Targetmol-Natural Compound Library-1680cpds	0.346812
COc1ccc(-c2cc(=O)c3c(O)cc(OC4OC(CO)C(O)C(O)C4OC4OC(C)C(O)C(O)C4O)cc3o2)cc1O	L6000-Targetmol-Natural Compound Library-1680cpds	0.503004
CC(O)C(C)C(N)C(=O)O	L6000-Targetmol-Natural Compound Library-1680cpds	0.488189
CCCCCCCCCCCCCCCCCC(=O)O	L6000-Targetmol-Natural Compound Library-1680cpds	0.36
CCCCCCCCCCCCCCCCCCCCCCCCCCCCC	L6000-Targetmol-Natural Compound Library-1680cpds	0.203125
COc1cc(C)c2c(=O)c(-c3ccccc3)coc2c1	L6000-Targetmol-Natural Compound Library-1680cpds	0.387681
COc1cc(C=CC(=O)[O-])ccc1O.[Na+]	L6000-Targetmol-Natural Compound Library-1680cpds	0.514673
COc1cc(C2c3cc4c(cc3C(O)C3COC(=O)C23)OCO4)cc(OC)c1O	L6000-Targetmol-Natural Compound Library-1680cpds	0.483296
O=C(O)C(O)c1ccccc1	L6000-Targetmol-Natural Compound Library-1680cpds	0.363636
CCCCCCCCCCCCCCCC(=O)OC	L6000-Targetmol-Natural Compound Library-1680cpds	0.480315
CCCCCCCCCCCCCCCC(=O)OCC	L6000-Targetmol-Natural Compound Library-1680cpds	0.359649
O=c1ccc2cc(O)ccc2o1	L6000-Targetmol-Natural Compound Library-1680cpds	0.495902
O=CC(O)C(O)C(O)CO	L6000-Targetmol-Natural Compound Library-1680cpds	0.345833
C=CCc1ccc(OC(C)=O)c(OC)c1	L6000-Targetmol-Natural Compound Library-1680cpds	0.41048
CC=Cc1ccc(OC(C)=O)c(OC)c1	L6000-Targetmol-Natural Compound Library-1680cpds	0.406562
CC=Cc1ccc(O)c(OC)c1	L6000-Targetmol-Natural Compound Library-1680cpds	0.468278
C[C@@H]1CC[C@]2(C(=O)O[C@@H]3O[C@H](CO)[C@@H](O)[C@H](O)[C@H]3O)CC[C@]3(C)C(=CC[C@@H]4[C@@]5(C)CC[C@H](O)[C@](C)(C(=O)O)C5CC[C@]43C)[C@@H]2[C@]1(C)O	L6000-Targetmol-Natural Compound Library-1680cpds	0.648427
CC(C)=CCCC(C(=O)O)C1CCC2(C)C3=C(CCC12C)C1(C)CCC(=O)C(C)(C)C1CC3	L6000-Targetmol-Natural Compound Library-1680cpds	0.592105
CC(=O)CCc1ccc(O)cc1	L6000-Targetmol-Natural Compound Library-1680cpds	0.515556
CCC1=NC2CC3(C(=O)N(OC)c4ccccc43)C3CC1C2CO3	L6000-Targetmol-Natural Compound Library-1680cpds	0.63981
C=CCC(=NOS(=O)(=O)[O-])SC1OC(CO)C(O)C(O)C1O.[K+]	L6000-Targetmol-Natural Compound Library-1680cpds	0.415265
O=C(O)CC(O)C(=O)O	L6000-Targetmol-Natural Compound Library-1680cpds	0.512
COc1ccccc1C=CC(=O)O	L6000-Targetmol-Natural Compound Library-1680cpds	0.501182
O=C(C=Cc1ccc(O)c(O)c1)OC1CC(O)(C(=O)O)CC(O)C1OC(=O)C=Cc1ccc(O)c(O)c1	L6000-Targetmol-Natural Compound Library-1680cpds	0.498039
O=c1ccc2c(O)c3ccoc3cc2o1	L6000-Targetmol-Natural Compound Library-1680cpds	0.374741
COc1c(OC2OC(CO)C(O)C(O)C2O)cc2c(c1OC)-c1ccc(SC)c(=O)cc1C(NC(C)=O)CC2	L6000-Targetmol-Natural Compound Library-1680cpds	0.589238
CCOC(=O)C=Cc1ccc(OC)cc1	L6000-Targetmol-Natural Compound Library-1680cpds	0.440181
O=C(CCc1ccccc1)CC(O)C=Cc1ccccc1	L6000-Targetmol-Natural Compound Library-1680cpds	0.523918
C=CC1CNC(=S)O1	L6000-Targetmol-Natural Compound Library-1680cpds	0.486166
Oc1cc2c3c(c1)c1cc4c(cc1c[n+]3CC2)OCO4	L6000-Targetmol-Natural Compound Library-1680cpds	0.409062
O=Cc1ccc(O)cc1	L6000-Targetmol-Natural Compound Library-1680cpds	0.42654
C=C1CC23CCC4C(C)(C(=O)O)CCCC4(C)C2CCC1(O)C3	L6000-Targetmol-Natural Compound Library-1680cpds	0.527778
CCCCCCCCOC(=O)c1cc(O)c(O)c(O)c1	L6000-Targetmol-Natural Compound Library-1680cpds	0.427673
COc1cc(C=CC=O)ccc1O	L6000-Targetmol-Natural Compound Library-1680cpds	0.479167
C=C(C)C1CC=C(C=NO)CC1	L6000-Targetmol-Natural Compound Library-1680cpds	0.390501
O.O.O=C(CCc1ccc(O)cc1)c1c(O)cc(O)cc1OC1OC(CO)C(O)C(O)C1O	L6000-Targetmol-Natural Compound Library-1680cpds	0.472653
C=C1C(O)CC2C(C=C(C)C(=O)C3(O)CC(C)C(O)C3C1O)C2(C)C	L6000-Targetmol-Natural Compound Library-1680cpds	0.509299
COc1ccc2[nH]c(=O)oc2c1	L6000-Targetmol-Natural Compound Library-1680cpds	0.422274
C=CC(C)(O)CCC=C(C)CCC=C(C)C	L6000-Targetmol-Natural Compound Library-1680cpds	0.450413
O=C(C=Cc1ccc(O)cc1)c1c(O)cc(O)cc1O	L6000-Targetmol-Natural Compound Library-1680cpds	0.592784
C=CC(C)(O)CCC=C(C)C	L6000-Targetmol-Natural Compound Library-1680cpds	0.374486
CN1C2=C3N=c4ccccc4=C3CCN2C(=O)c2ccccc21	L6000-Targetmol-Natural Compound Library-1680cpds	0.635079
O=C[C@H](O)[C@@H](O)[C@H](O)[C@H](O)CO[C@H]1O[C@H](CO[C@H]2O[C@H](CO)[C@H](O)[C@H](O)[C@H]2O)[C@H](O)[C@H](O)[C@H]1O	L6000-Targetmol-Natural Compound Library-1680cpds	0.351775
CC(C)CC(N)C(=O)O	L6000-Targetmol-Natural Compound Library-1680cpds	0.327731
C=C1CCC2CC1C2(C)C	L6000-Targetmol-Natural Compound Library-1680cpds	0.538793
CCC=CCC=CCC=CCCCCCCCC(=O)O	L6000-Targetmol-Natural Compound Library-1680cpds	0.358079
CCOC(=O)C=Cc1ccc(O)c(O)c1	L6000-Targetmol-Natural Compound Library-1680cpds	0.485327
COc1cc(C2c3cc4c(cc3C(O)C3COC(=O)C23)OCO4)cc(OC)c1OC	L6000-Targetmol-Natural Compound Library-1680cpds	0.484697
CC(C=CC=C(C)C(=O)OC1OC(COC2OC(CO)C(O)C(O)C2O)C(O)C(O)C1O)=CC=CC=C(C)C=CC=C(C)C(=O)OC1OC(COC2OC(CO)C(O)C(O)C2O)C(O)C(O)C1O	L6000-Targetmol-Natural Compound Library-1680cpds	0.5
O.O.O.O.O.OCC1OC(OCC2OC(OC3(CO)OC(CO)C(O)C3O)C(O)C(O)C2O)C(O)C(O)C1O	L6000-Targetmol-Natural Compound Library-1680cpds	0.417773
NC(N)=NCCCC(N)C(=O)O	L6000-Targetmol-Natural Compound Library-1680cpds	0.405512
CN1C2CC(OC(=O)C(CO)c3ccccc3)CC1C1OC12	L6000-Targetmol-Natural Compound Library-1680cpds	0.399485
COc1cc(CC(=O)O)ccc1O	L6000-Targetmol-Natural Compound Library-1680cpds	0.57622
CC1OC(OC2CCC3(C)C(CCC4(C)C3C=CC3=C5CC(C)(C)CCC5(CO)C(O)CC34C)C2(C)CO)C(OC2OC(CO)C(O)C(O)C2O)C(OC2OC(CO)C(O)C(O)C2O)C1O	L6000-Targetmol-Natural Compound Library-1680cpds	0.56516
CCCCCCCCC=CCCCCCCCC(=O)OCC(COC(=O)CCCCCCCC=CCCCCCCCC)OC(=O)CCCCCCCC=CCCCCCCCC	L6000-Targetmol-Natural Compound Library-1680cpds	0.440506
COc1cc(C=CC(=O)NCCc2ccc(O)cc2)ccc1O	L6000-Targetmol-Natural Compound Library-1680cpds	0.44958
COc1ccc(C=CC(=O)c2c(O)cc(OC)cc2OC)cc1	L6000-Targetmol-Natural Compound Library-1680cpds	0.667216
COc1ccc(C=Cc2cc(OC)cc(=O)o2)cc1	L6000-Targetmol-Natural Compound Library-1680cpds	0.402868
COc1cc2c3cc1Oc1c(OC)c(OC)cc4c1C(Cc1ccc(O)c(c1)Oc1ccc(cc1)CC3N(C)CC2)N(C)CC4	L6000-Targetmol-Natural Compound Library-1680cpds	0.467295
CC1CCC2(OC1)OC1CC3C4CCC5CC(O)C(O)CC5(C)C4CCC3(C)C1C2C	L6000-Targetmol-Natural Compound Library-1680cpds	0.423963
CC1CCC2(OC1)OC1CC3C4CCC5CC(O)CCC5(C)C4CCC3(C)C1C2C	L6000-Targetmol-Natural Compound Library-1680cpds	0.422601
Oc1cc(O)cc(C=Cc2ccc(O)cc2O)c1	L6000-Targetmol-Natural Compound Library-1680cpds	0.461538
COc1cc(C2OCC3C(c4ccc(OC)c(OC)c4)OCC23)ccc1O	L6000-Targetmol-Natural Compound Library-1680cpds	0.390625
CC(C)=CC(=O)OC1Cc2cc3ccc(=O)oc3cc2OC1(C)C	L6000-Targetmol-Natural Compound Library-1680cpds	0.45848
CC(=O)OC(C)(C)CCC(=O)C(C)(O)C1C(O)CC2(C)C3CC=C4C(CC(O)C(O)C4(C)C)C3(C)C(=O)CC12C	L6000-Targetmol-Natural Compound Library-1680cpds	0.637181
O=CC=Cc1ccccc1	L6000-Targetmol-Natural Compound Library-1680cpds	0.348214
CC(C)=CCCC(C)(OC1OC(COC2OC(CO)C(O)C(O)C2O)C(O)C(O)C1O)C1CCC2(C)C1C(O)CC1C3(C)CCC(OC4OC(CO)C(O)C(O)C4OC4OC(CO)C(O)C(O)C4OC4OCC(O)C(O)C4O)C(C)(C)C3CCC12C	L6000-Targetmol-Natural Compound Library-1680cpds	0.510791
CC(C)=CCC[C@](C)(O[C@@H]1O[C@H](CO[C@@H]2OC[C@@H](O)[C@H](O)[C@H]2O)[C@@H](O)[C@H](O)[C@H]1O)[C@H]1CC[C@]2(C)C1[C@H](O)C[C@@H]1[C@@]3(C)CC[C@H](O[C@@H]4O[C@H](CO)[C@@H](O)[C@H](O)[C@H]4O[C@@H]4O[C@H](CO)[C@@H](O)[C@H](O)[C@H]4O[C@@H]4OC[C@@H](O)[C@H](O)[C@H]4O)C(C)(C)[C@@H]3CC[C@]12C	L6000-Targetmol-Natural Compound Library-1680cpds	0.510791
OC1CC2CCN3Cc4cc5c(cc4C(C1O)C23)OCO5	L6000-Targetmol-Natural Compound Library-1680cpds	0.516712
O=C(O)CC(O)(CC(=O)OCc1ccc(OC2OC(CO)C(O)C(O)C2O)cc1)C(=O)OCc1ccc(OC2OC(CO)C(O)C(O)C2O)cc1	L6000-Targetmol-Natural Compound Library-1680cpds	0.449814
CC(C=CC=C(C)C=CC1=C(C)CC(O)CC1(C)C)=CC=CC=C(C)C=CC=C(C)C=CC1C(C)=CC(O)CC1(C)C	L6000-Targetmol-Natural Compound Library-1680cpds	0.477891
CCCOC(=O)c1cc(O)c(O)c(O)c1	L6000-Targetmol-Natural Compound Library-1680cpds	0.554598
CCN1CC2(COC)CCC(OC)C34C5CC6(O)C(OC)CC(OC(C)=O)(C5C6OC(=O)c5ccc(OC)cc5)C(C(OC)C23)C14	L6000-Targetmol-Natural Compound Library-1680cpds	0.502938
C=C1C2CC2C2(C)Cc3occ(C)c3C(O)C12	L6000-Targetmol-Natural Compound Library-1680cpds	0.468235
CCc1c2c(nc3ccccc13)-c1cc3c(c(=O)n1C2)COC(=O)C3(O)CC	L6000-Targetmol-Natural Compound Library-1680cpds	0.654536
CCC(=O)c1cc2c(cc1O)OCO2	L6000-Targetmol-Natural Compound Library-1680cpds	0.516312
Cn1cc(CC(N)C(=O)O)c2ccccc21	L6000-Targetmol-Natural Compound Library-1680cpds	0.342697
CC1CCC2(C(=O)O)CCC3(C)C(=CCC4C5(C)CCC(=O)C(C)(C)C5CCC43C)C2C1C	L6000-Targetmol-Natural Compound Library-1680cpds	0.711198
C=C1CCC2C(C=C(C)C(=O)C3(O)CC(C)C(O)C3C1O)C2(C)C	L6000-Targetmol-Natural Compound Library-1680cpds	0.508696
C=C1CC23CCC4C(C)(C(=O)OC5OC(CO)C(O)C(O)C5O)CCCC4(C)C2CCC1(OC1OC(CO)C(O)C(O)C1O)C3	L6000-Targetmol-Natural Compound Library-1680cpds	0.575101
CCCC=C1OC(=O)c2ccccc21	L6000-Targetmol-Natural Compound Library-1680cpds	0.453125
CCCCCCCCCCCCCCCC(=O)NCc1ccccc1	L6000-Targetmol-Natural Compound Library-1680cpds	0.375556
CC1(C)CCC2(C(=O)O)CCC3=C(CCC4C3(C)CCC3C4(C)CC(O)C(O)C3(C)C(=O)O)C2C1	L6000-Targetmol-Natural Compound Library-1680cpds	0.73262
C=CCc1ccc(OC)c(OC)c1	L6000-Targetmol-Natural Compound Library-1680cpds	0.551084
COC(=O)C1=COC(OC2OC(CO)C(O)C(O)C2O)C2C1C=CC2(O)CO	L6000-Targetmol-Natural Compound Library-1680cpds	0.523227
CC(C)=CCC(OC(=O)C=C(C)C)C1=CC(=O)c2c(O)ccc(O)c2C1=O	L6000-Targetmol-Natural Compound Library-1680cpds	0.472808
CC(=O)OC1C(=O)C2(C)C(O)CC3OCC3(OC(C)=O)C2C(OC(=O)c2ccccc2)C2(O)CC(OC(=O)C(O)C(NC(=O)c3ccccc3)c3ccccc3)C(C)=C1C2(C)C	L6000-Targetmol-Natural Compound Library-1680cpds	0.594538
CC12CCC(O)CC1CCC1C2CCC2(C)C(c3ccc(=O)oc3)CC3OC312	L6000-Targetmol-Natural Compound Library-1680cpds	0.505236
CCCCCC=CCC=CCCCCCCCC(=O)O	L6000-Targetmol-Natural Compound Library-1680cpds	0.353712
CC(C)=CCCC(C)=CCc1cc(-c2coc3cc(O)ccc3c2=O)ccc1O	L6000-Targetmol-Natural Compound Library-1680cpds	0.410194
CC(C=CC=C(C)C(=O)O)=CC=CC=C(C)C=CC=C(C)C(=O)O	L6000-Targetmol-Natural Compound Library-1680cpds	0.411523
O=C(C=CC=Cc1ccccc1)CCc1ccccc1	L6000-Targetmol-Natural Compound Library-1680cpds	0.43908
CC1(C)CCC2(C(=O)OC3OC(CO)C(O)C(O)C3O)CCC3(C)C(=CCC4C5(C)CCC(OC6OC(C(=O)O)C(OC7OC(CO)C(O)C7O)C(O)C6O)C(C)(C)C5CCC43C)C2C1	L6000-Targetmol-Natural Compound Library-1680cpds	0.662551
O=c1cc(-c2ccc(O)cc2)oc2cc(OC3OC(CO)C(O)C(O)C3O)cc(O)c12	L6000-Targetmol-Natural Compound Library-1680cpds	0.465594
COc1c(C=CC(=O)c2ccc(O)cc2)ccc(O)c1O	L6000-Targetmol-Natural Compound Library-1680cpds	0.618442
CC12CC(c3ccoc3)OC(=O)C1CCC1(C)C2C2C=CC1(O)C(=O)O2	L6000-Targetmol-Natural Compound Library-1680cpds	0.559951
COc1cc2oc(=O)ccc2c(OC)c1CC(O)C(C)(C)O	L6000-Targetmol-Natural Compound Library-1680cpds	0.406173
COc1ccc(-c2cc(=O)c3c(O)cc(OC4OC(CO)C(O)C(O)C4O)cc3o2)cc1O	L6000-Targetmol-Natural Compound Library-1680cpds	0.481563
CC12CC(c3ccoc3)OC13CC(OC3=O)C1C3CC(CC12)OC3=O	L6000-Targetmol-Natural Compound Library-1680cpds	0.523579
COc1cc2c(cc1O)CCN1Cc3c(ccc(OC)c3OC)CC21	L6000-Targetmol-Natural Compound Library-1680cpds	0.428663
COc1ccc2cc3[n+](cc2c1OC)CCc1cc2c(cc1-3)OCO2	L6000-Targetmol-Natural Compound Library-1680cpds	0.515271
Cc1cc(O)c(C(=O)CCC(C)C)c(=O)o1	L6000-Targetmol-Natural Compound Library-1680cpds	0.359694
COc1cc(O)c2c(=O)c(-c3ccc(O)cc3)coc2c1	L6000-Targetmol-Natural Compound Library-1680cpds	0.381366
CC(=O)OC12CCC(C)=CCC13CCC2C(C)(C=CC=C(C)C(=O)O)OC3=O	L6000-Targetmol-Natural Compound Library-1680cpds	0.643258
COc1cc(O)c(CC=C(C)C)c2c1C(=O)CC(c1ccc(O)cc1)O2	L6000-Targetmol-Natural Compound Library-1680cpds	0.675277
CC(C)C1=CC(=O)C(C)(C2C(O)CC3(C)C4CC=C5C(CCC(OC6OC(CO)C(O)C(O)C6OC6OC(C)C(O)C(O)C6O)C5(C)C)C4(C)C(=O)CC23C)O1	L6000-Targetmol-Natural Compound Library-1680cpds	0.566586
COC(=O)C1(C)CCC2(C)CCC3(C)C4=CC=C5C(=CC(=O)C(O)=C5C)C4(C)CCC3(C)C2C1	L6000-Targetmol-Natural Compound Library-1680cpds	0.553468
COc1cc2c(cc1OC)C(Cc1ccc(O)c(Oc3cc4c(cc3OC)CCN(C)C4Cc3ccc(O)cc3)c1)N(C)CC2.[O-][Cl+3]([O-])([O-])O.[O-][Cl+3]([O-])([O-])O	L6000-Targetmol-Natural Compound Library-1680cpds	0.406417
COc1ccc2c(c1O)-c1c(O)c(OC)cc3c1C(C2)[N+](C)(C)CC3.[Cl-]	L6000-Targetmol-Natural Compound Library-1680cpds	0.49466
COc1cc2cc(Oc3ccc4ccc(=O)oc4c3)c(=O)oc2cc1O	L6000-Targetmol-Natural Compound Library-1680cpds	0.362924
CC=C(C)C(=O)OC1C(OC(C)=O)c2c(ccc3ccc(=O)oc23)OC1(C)C	L6000-Targetmol-Natural Compound Library-1680cpds	0.576514
CC=C(C)C(=O)OC1C(OC(=O)CC(C)C)c2c(ccc3ccc(=O)oc23)OC1(C)C	L6000-Targetmol-Natural Compound Library-1680cpds	0.57931
C=C(C(=O)O)C1CCC(C)C2CCC(C)=CC12	L6000-Targetmol-Natural Compound Library-1680cpds	0.616622
CC(C)(O)C1CCC(C)(C2CCC3(C)C2C(O)CC2C4(C)CCC(O)C(C)(C)C4C(OC4OC(CO)C(O)C(O)C4O)CC23C)O1	L6000-Targetmol-Natural Compound Library-1680cpds	0.490511
CC(C)=CCC12Oc3cc(O)c(C4C=C(C)CC(c5ccc(O)cc5O)C4C(=O)c4ccc(O)cc4O)c(O)c3C(=O)C1(O)Oc1cc(O)ccc12	L6000-Targetmol-Natural Compound Library-1680cpds	0.658612
CN1C2CCC1CC(OC(=O)C(CO)c1ccccc1)C2.CN1C2CCC1CC(OC(=O)C(CO)c1ccccc1)C2.O=S(=O)(O)O	L6000-Targetmol-Natural Compound Library-1680cpds	0.47836
CC(C)=CCc1c(O)cc2oc3cc(O)c(O)c(CC=C(C)C)c3c(=O)c2c1O	L6000-Targetmol-Natural Compound Library-1680cpds	0.414798
O=c1ccc2cc3ccoc3c(O)c2o1	L6000-Targetmol-Natural Compound Library-1680cpds	0.378519
C=C1C2CC3(C1O)C1CC4C5(C)CCC(O)C4(C1N(CC)C5)C3CC2O	L6000-Targetmol-Natural Compound Library-1680cpds	0.468793
CC1(C(O)CO)C=C2CCC3C(C)(CO)CC(O)CC3(C)C2CC1	L6000-Targetmol-Natural Compound Library-1680cpds	0.595057
Cc1ccc(C(C)C)cc1O	L6000-Targetmol-Natural Compound Library-1680cpds	0.388571
COc1ccc(-c2cc(=O)c3c(O)cc(O)c(-c4cc(-c5cc(=O)c6c(O)cc(O)cc6o5)ccc4OC)c3o2)cc1	L6000-Targetmol-Natural Compound Library-1680cpds	0.467232
CC1OC(OCC2OC(Oc3cc(O)c4c(c3)OC(c3ccc(O)cc3)CC4=O)C(O)C(O)C2O)C(O)C(O)C1O	L6000-Targetmol-Natural Compound Library-1680cpds	0.607922
C=C(C)C1CCC2(C(=O)O)CCC3(C)C(CCC4C5(C)CCC(=O)C(C)(C)C5CCC43C)C12	L6000-Targetmol-Natural Compound Library-1680cpds	0.497154
COc1cc2ccc(=O)oc2c(OC)c1O	L6000-Targetmol-Natural Compound Library-1680cpds	0.493347
c1c2c(cc3c1OCO3)-c1cc3ccc4c(c3c[n+]1CC2)OCO4	L6000-Targetmol-Natural Compound Library-1680cpds	0.515254
CN1Cc2c(ccc3c2OCO3)C2C(O)Cc3cc4c(cc3C21)OCO4	L6000-Targetmol-Natural Compound Library-1680cpds	0.534846
[Cl-].c1c2c(cc3c1OCO3)-c1cc3ccc4c(c3c[n+]1CC2)OCO4	L6000-Targetmol-Natural Compound Library-1680cpds	0.515254
C=C1CCCC2(C)C=C3OC(=O)C(C)=C3CC12	L6000-Targetmol-Natural Compound Library-1680cpds	0.514727
C=C1CCCC2(C)CC3OC(=O)C(C)=C3CC12	L6000-Targetmol-Natural Compound Library-1680cpds	0.589744
CC1=C(CCC(C)COC2OC(CO)C(O)C(O)C2O)OC2CC3C4CC=C5CC(OC6OC(CO)C(OC7OC(C)C(O)C(O)C7O)C(O)C6OC6OC(C)C(O)C(O)C6O)CCC5(C)C4CCC3(C)C12	L6000-Targetmol-Natural Compound Library-1680cpds	0.560425
COc1ccc(CCO[C@@H]2O[C@H](CO[C@@H]3O[C@H](CO)[C@@H](O)[C@H](O)[C@H]3O)[C@@H](OC(=O)/C=C/c3ccc(O)c(O)c3)[C@H](O[C@@H]3O[C@@H](C)[C@H](O)[C@@H](O)[C@H]3O)[C@H]2O)cc1O	L6000-Targetmol-Natural Compound Library-1680cpds	0.465717
O=C(C=Cc1ccc(OC2OC(CO)C(O)C(O)C2O)cc1)c1ccc(O)cc1O	L6000-Targetmol-Natural Compound Library-1680cpds	0.483431
COc1ccc(C=Cc2cc(O)cc(OC3OC(CO)C(O)C(O)C3O)c2)cc1O	L6000-Targetmol-Natural Compound Library-1680cpds	0.391468
COc1cc(C2OCC3C(c4cc(OC)c(OC5OC(CO)C(O)C(OC6OCC(O)(CO)C6O)C5O)c(OC)c4)OCC23)cc(OC)c1O	L6000-Targetmol-Natural Compound Library-1680cpds	0.501387
O=C(O)CC(O)(CC(=O)O)C(=O)O	L6000-Targetmol-Natural Compound Library-1680cpds	0.369077
CC(C)=CCCC(C)=CCOc1c2ccoc2cc2oc(=O)ccc12	L6000-Targetmol-Natural Compound Library-1680cpds	0.509625
CC(C)=CCCC1(C)CCC2(C)C3CCC4(C)C(C)C(=O)CCC4C3(C)CCC2(C)C1	L6000-Targetmol-Natural Compound Library-1680cpds	0.415094
O=c1c(OC2OC(CO)C(O)C(O)C2O)c(-c2ccc(O)c(O)c2)oc2cc(O)cc(O)c12	L6000-Targetmol-Natural Compound Library-1680cpds	0.538958
COc1cc2c[n+](C)c3c4cc5c(cc4ccc3c2cc1OC)OCO5.[Cl-]	L6000-Targetmol-Natural Compound Library-1680cpds	0.457105
COc1cc2c(cc1OC)-c1cc3ccc(OC)c(OC)c3c[n+]1CC2	L6000-Targetmol-Natural Compound Library-1680cpds	0.504916
COc1ccc2cc3[n+](cc2c1OC)CCc1cc2c(cc1-3)OCO2.O=S(=O)([O-])O	L6000-Targetmol-Natural Compound Library-1680cpds	0.518079
CC(=O)OC1C(O)COC(OC2CCC34CC35CCC3(C)C(C6(C)CCC(C(C)(C)O)O6)C(O)CC3(C)C5CC(OC3OC(CO)C(O)C(O)C3O)C4C2(C)C)C1O	L6000-Targetmol-Natural Compound Library-1680cpds	0.490985
CC(C)C1=CC(=O)C(C)(C2C(O)CC3(C)C4CC=C5C(CCC(OC6OCC(O)C(O)C6OC6OC(C)C(O)C(O)C6O)C5(C)C)C4(C)C(=O)CC23C)O1	L6000-Targetmol-Natural Compound Library-1680cpds	0.566586
COc1ccc(CC2c3cc(Oc4cc(CC5c6cc(OC)c(OC)cc6CCN5C)ccc4O)c(OC)cc3CCN2C)cc1	L6000-Targetmol-Natural Compound Library-1680cpds	0.408602
COc1cc2c(cc1OC)C(Cc1ccc(O)c(Oc3cc4c(cc3OC)CCN(C)C4Cc3ccc(O)cc3)c1)N(C)CC2	L6000-Targetmol-Natural Compound Library-1680cpds	0.408602
COc1ccc(CC2c3cc(Oc4cc(CC5c6cc(O)c(OC)cc6CCN5C)ccc4O)c(OC)cc3CCN2C)cc1	L6000-Targetmol-Natural Compound Library-1680cpds	0.410326
O=C1c2c(O)cccc2C(C2OC(CO)C(O)C(O)C2O)c2cc(CO)cc(O)c21	L6000-Targetmol-Natural Compound Library-1680cpds	0.492308
CC(C)(O)C1Cc2cc3ccc(=O)oc3cc2O1	L6000-Targetmol-Natural Compound Library-1680cpds	0.406173
O=C(/C=C/c1ccc(O)c(O)c1)O[C@H]1[C@H](O)C[C@](O)(C(=O)O)C[C@H]1OC(=O)/C=C/c1ccc(O)c(O)c1	L6000-Targetmol-Natural Compound Library-1680cpds	0.498039
OCC=Cc1ccccc1	L6000-Targetmol-Natural Compound Library-1680cpds	0.345833
CC(=O)OC1CCC2(C)C(CCC3(C)C2C(=O)C=C2C4C(C)C(C)CCC4(C)CCC23C)C1(C)C(=O)O	L6000-Targetmol-Natural Compound Library-1680cpds	0.699336
O=c1ccoc2cc(O)cc(O)c12	L6000-Targetmol-Natural Compound Library-1680cpds	0.373457
C=C1C2CC3(C1O)C1CC4C5(C)CCC(O)C4(C1N(CC)C5)C3CC2=O	L6000-Targetmol-Natural Compound Library-1680cpds	0.477333
CCN1CC2(COC)C(OC(C)=O)CC(OC)C34C5CC6(O)C(OC)C(O)C(OC(C)=O)(C5C6OC(=O)c5ccccc5)C(C(OC)C23)C14	L6000-Targetmol-Natural Compound Library-1680cpds	0.511876
COc1cc2c(cc1O)CC1NCCc3cc(OC)c(O)c-2c31	L6000-Targetmol-Natural Compound Library-1680cpds	0.472159
CC1=CCCC2=CC(OC2=O)c2c(C)coc2C1	L6000-Targetmol-Natural Compound Library-1680cpds	0.465738
c1cc2c(cc1C1OCC3C(c4ccc5c(c4)OCO5)OCC13)OCO2	L6000-Targetmol-Natural Compound Library-1680cpds	0.396907
C=C(C)C1CCC2(C)CCC(=O)C(C)=C2C1	L6000-Targetmol-Natural Compound Library-1680cpds	0.547804
COC1CC(OC2CCC3(C)C4CCC5(C)C(C6=CC(=O)OC6)CCC5(O)C4CCC3(O)C2)OC(C)C1OC1OC(CO)C(O)C(O)C1O	L6000-Targetmol-Natural Compound Library-1680cpds	0.569638
CC1=CC23C(=O)C(C=C(CO)C(O)C2(O)C1O)C1C(CC3C)C1(C)C	L6000-Targetmol-Natural Compound Library-1680cpds	0.553719
CCCCC1OC(=O)C2=C1CCC=C2	L6000-Targetmol-Natural Compound Library-1680cpds	0.434191
CCCC=C1OC(=O)C2=C1CCC(O)C2O	L6000-Targetmol-Natural Compound Library-1680cpds	0.450578
COc1ccc(C2OCC3C(c4ccc5c(c4)OCO5)OCC23)cc1OC	L6000-Targetmol-Natural Compound Library-1680cpds	0.395379
CC(=O)OC(CC=C(C)C)C1=CC(=O)c2c(O)ccc(O)c2C1=O	L6000-Targetmol-Natural Compound Library-1680cpds	0.466073
CC(C)=CCCC1=CC(=O)c2c(O)ccc(O)c2C1=O	L6000-Targetmol-Natural Compound Library-1680cpds	0.411248
CC(=O)OC1Cc2cc3c(cc2C2N(C)Cc4c(ccc5c4OCO5)C12C)OCO3	L6000-Targetmol-Natural Compound Library-1680cpds	0.603367
COc1cc2c(cc1OC)C1C(C)c3ccc(OC)c(OC)c3CN1CC2	L6000-Targetmol-Natural Compound Library-1680cpds	0.480817
COc1cc2c(cc1OC)-c1cc3ccc4c(c3c[n+]1CC2)OCO4	L6000-Targetmol-Natural Compound Library-1680cpds	0.513284
Nc1[nH]c(=O)nc2c1ncn2C1OC(CO)C(O)C1O	L6000-Targetmol-Natural Compound Library-1680cpds	0.517083
COc1ccc2c(c[n+](C)c3c4cc5c(cc4ccc23)OCO5)c1OC	L6000-Targetmol-Natural Compound Library-1680cpds	0.512712
CC1=C2C(=O)OC(c3ccoc3)C2(C)CCC1	L6000-Targetmol-Natural Compound Library-1680cpds	0.522262
CC(C)(O)C(O)COc1c2ccoc2cc2oc(=O)ccc12	L6000-Targetmol-Natural Compound Library-1680cpds	0.356397
CCC1C2CCCCN3C(C4CC(C)C(=O)O4)CC(C4C(C)C(=O)OC14)C23	L6000-Targetmol-Natural Compound Library-1680cpds	0.502778
COc1cc(O)c2c(=O)cc(-c3ccc(O)cc3)oc2c1	L6000-Targetmol-Natural Compound Library-1680cpds	0.370186
CC1CCC2N(C1)CC1C3CC4C(CC(=O)C5CC(O)CCC54C)C3CCC1C2(C)O	L6000-Targetmol-Natural Compound Library-1680cpds	0.475738
CC1CCC2N(C1)CC1C3CC4C(CC(O)C5CC(O)CCC54C)C3CCC1C2(C)O	L6000-Targetmol-Natural Compound Library-1680cpds	0.437037
COc1cc2c(cc1OC)C(Cc1ccc(Oc3cc(CC4c5cc(OC)c(OC)cc5CCN4C)ccc3O)cc1)N(C)CC2	L6000-Targetmol-Natural Compound Library-1680cpds	0.407913
CC(C)=CCc1cc(-c2coc3cc(O)ccc3c2=O)ccc1O	L6000-Targetmol-Natural Compound Library-1680cpds	0.388551
CC1OC(OCC2OC(Oc3cc(O)c4c(c3)OC(c3ccc(O)c(O)c3)CC4=O)C(O)C(O)C2O)C(O)C(O)C1O	L6000-Targetmol-Natural Compound Library-1680cpds	0.638777
O=C1CC(c2ccc(O)c(O)c2)Oc2cc(O)cc(O)c21	L6000-Targetmol-Natural Compound Library-1680cpds	0.778243
CC(=O)OC1CC(O)C23COC(O)C1(C)C2CC(O)C1(C)C3C(=O)C(OC(C)=O)C2(C)C(c3ccoc3)CC3OC321	L6000-Targetmol-Natural Compound Library-1680cpds	0.515535
COc1ccc(-c2coc3cc(OC4OC(CO)C(O)C(O)C4O)ccc3c2=O)cc1	L6000-Targetmol-Natural Compound Library-1680cpds	0.434932
COc1cc2c(=O)c(-c3ccc(O)cc3)coc2cc1O	L6000-Targetmol-Natural Compound Library-1680cpds	0.390977
Cc1c(O)c(C)c2c(c1O)C(=O)CC(c1ccc(O)cc1)O2	L6000-Targetmol-Natural Compound Library-1680cpds	0.704253
COc1cc(C2OCC3C(c4ccc(OC5OC(CO)C(O)C(O)C5O)c(OC)c4)OCC23)ccc1OC1OC(CO)C(O)C(O)C1O	L6000-Targetmol-Natural Compound Library-1680cpds	0.467569
COCC12CN(C)C3C4C(OC)C1C3(C(OC)CC2O)C1CC2(O)C(OC)C(O)C4(OC(C)=O)C1C2OC(=O)c1ccccc1	L6000-Targetmol-Natural Compound Library-1680cpds	0.511296
COc1ccc(-c2cc(=O)c3c(O)cc(OC4OC(COC5OC(C)C(O)C(O)C5O)C(O)C(O)C4O)cc3o2)cc1	L6000-Targetmol-Natural Compound Library-1680cpds	0.479868
C=CC1CN2CCC3(C(=O)Nc4ccccc43)C2CC1C(=COC)C(=O)OC	L6000-Targetmol-Natural Compound Library-1680cpds	0.592191
CCC1CN2CCC3(C(=O)Nc4ccccc43)C2CC1C(=COC)C(=O)OC	L6000-Targetmol-Natural Compound Library-1680cpds	0.585193
O=c1cc(-c2ccc(O)c(O)c2)oc2c(C3OC(CO)C(O)C(O)C3O)c(O)cc(O)c12	L6000-Targetmol-Natural Compound Library-1680cpds	0.596723
O=c1cc(-c2ccc(O)c(O)c2)oc2cc(O)c(C3OC(CO)C(O)C(O)C3O)c(O)c12	L6000-Targetmol-Natural Compound Library-1680cpds	0.549704
COc1cc(O)c(C(=O)C=Cc2ccccc2)c(OC)c1	L6000-Targetmol-Natural Compound Library-1680cpds	0.655684
COc1cc2c(cc1O)CC1c3cc(O)c(OC)cc3CC[N+]1(C)C2	L6000-Targetmol-Natural Compound Library-1680cpds	0.405494
CC1OC(OC2C(=O)c3c(O)cc(O)cc3OC2c2ccc(O)cc2)C(O)C(O)C1O	L6000-Targetmol-Natural Compound Library-1680cpds	0.57567
C=C1C(OC(=O)C=C(C)CC)CC(C(C)C)C2C1CC(=O)C2C(C)OC(C)=O	L6000-Targetmol-Natural Compound Library-1680cpds	0.592652
O=c1c(OC2OC(CO)C(O)C(O)C2O)c(-c2ccc(O)cc2)oc2cc(O)cc(O)c12	L6000-Targetmol-Natural Compound Library-1680cpds	0.53218
CC(CC(=O)CC(C)C1CC(O)C2(C)C3=C(C(=O)CC12C)C1(C)CCC(=O)C(C)(C)C1CC3O)C(=O)O	L6000-Targetmol-Natural Compound Library-1680cpds	0.599709
CC1CCC2(OC1)OC1CC3C4CC=C5CC(O)CC(O)C5(C)C4CCC3(C)C1C2C	L6000-Targetmol-Natural Compound Library-1680cpds	0.588598
CC(C)c1cc2c(c(O)c1O)C13CCCC(C)(C)C1CC2OC3=O	L6000-Targetmol-Natural Compound Library-1680cpds	0.54922
COc1c(O)cc2oc(-c3ccccc3)cc(=O)c2c1O	L6000-Targetmol-Natural Compound Library-1680cpds	0.381643
O=c1cc(-c2ccc(O)cc2)oc2c(C3OC(CO)C(O)C(O)C3O)c(O)cc(O)c12	L6000-Targetmol-Natural Compound Library-1680cpds	0.587892
O=c1cc(-c2ccc(O)cc2)oc2cc(O)c(C3OC(CO)C(O)C(O)C3O)c(O)c12	L6000-Targetmol-Natural Compound Library-1680cpds	0.540292
COc1ccc(-c2oc3cc(OC)c(OC)c(O)c3c(=O)c2OC)cc1O	L6000-Targetmol-Natural Compound Library-1680cpds	0.458333
CC=C(C)C(=O)OC1c2c(ccc3ccc(=O)oc23)OC(C)(C)C1OC(=O)C(C)=CC	L6000-Targetmol-Natural Compound Library-1680cpds	0.583775
CC(C)=CC(O)CC(C)=CCOc1c2ccoc2cc2oc(=O)ccc12	L6000-Targetmol-Natural Compound Library-1680cpds	0.382586
CC1C(O)CC2C(C(=O)O)=COC(OC3OC(CO)C(O)C(O)C3O)C21	L6000-Targetmol-Natural Compound Library-1680cpds	0.516796
O=C(C=Cc1ccc(O)c(O)c1)OC1C(O)CC(O)(C(=O)O)CC1O	L6000-Targetmol-Natural Compound Library-1680cpds	0.500511
O=C(C=Cc1ccc(O)c(O)c1)OC1CC(O)(C(=O)O)CC(O)C1O	L6000-Targetmol-Natural Compound Library-1680cpds	0.497502
CC=Cc1cc(OC)c2c(c1)C(C)C(c1ccc(O)c(OC)c1)O2	L6000-Targetmol-Natural Compound Library-1680cpds	0.464654
COc1c(O)cc2c(c1O)C(=O)c1c(cc(C)c(O)c1OC)C2=O	L6000-Targetmol-Natural Compound Library-1680cpds	0.405914
O=C(O)C1=COC(OC2OC(CO)C(O)C(O)C2O)C2C1C=CC2(O)CO	L6000-Targetmol-Natural Compound Library-1680cpds	0.517835
OCC1OC(Oc2cc(O)cc(C=Cc3ccc(OC4OC(CO)C(O)C(O)C4O)cc3O)c2)C(O)C(O)C1O	L6000-Targetmol-Natural Compound Library-1680cpds	0.389095
CC12CC(O)C3CC1(OC1OC(CO)C(O)C(O)C1O)C3(COC(=O)c1ccccc1)C(=O)O2	L6000-Targetmol-Natural Compound Library-1680cpds	0.518474
COc1cc(-c2coc3cc4c(c(OC)c3c2=O)OCO4)cc(OC)c1OC	L6000-Targetmol-Natural Compound Library-1680cpds	0.443317
COc1cc(C=CC(=O)CC(=O)C=Cc2ccc(O)cc2)ccc1O	L6000-Targetmol-Natural Compound Library-1680cpds	0.401138
CCCCCCCC(O)CC(=O)CCc1ccc(O)c(OC)c1	L6000-Targetmol-Natural Compound Library-1680cpds	0.403047
CCCCCC=CC(=O)CCc1ccc(O)c(OC)c1	L6000-Targetmol-Natural Compound Library-1680cpds	0.421397
CC1CCC=C2C(=O)CC3OOC(C)(C)C3C21C	L6000-Targetmol-Natural Compound Library-1680cpds	0.587025
OCC1(O)COc2cc(O)ccc2-c2cc(O)c(O)cc2C1	L6000-Targetmol-Natural Compound Library-1680cpds	0.416157
Oc1ccc2c(c1)OCC1(O)Cc3cc(O)c(O)cc3C21	L6000-Targetmol-Natural Compound Library-1680cpds	0.433428
CC=C(C)C(=O)OC1C2C3(C)CCC(OC4CC(OC)C(OC5OC(C)C(O)C(OC)C5O)C(C)O4)CC3CCC23OC32CCC(C(C)=O)C2(C)C1OC(C)=O	L6000-Targetmol-Natural Compound Library-1680cpds	0.522785
CCC(C)C(=O)OC1C2C3(C)CCC(OC4CC(OC)C(OC5OC(C)C(O)C(OC)C5O)C(C)O4)CC3CCC23OC32CCC(C(C)=O)C2(C)C1OC(C)=O	L6000-Targetmol-Natural Compound Library-1680cpds	0.503886
CC1=CCCC23OC2C(OC3=O)c2c(C)coc2C1	L6000-Targetmol-Natural Compound Library-1680cpds	0.563841
COc1cc2c(c(OC)c1OC)-c1c(cc3c(c1OC)OCO3)CC(C)C(C)(O)C2	L6000-Targetmol-Natural Compound Library-1680cpds	0.448436
CC=C(C)C(=O)OC1c2cc(OC)c(OC)c(OC)c2-c2c(cc3c(c2OC)OCO3)CC(C)C1(C)O	L6000-Targetmol-Natural Compound Library-1680cpds	0.557219
COc1cc2c(c(O)c1OC)-c1c(cc(OC)c(OC)c1OC)CC(C)C(C)C2	L6000-Targetmol-Natural Compound Library-1680cpds	0.425743
COc1cccc(OC)c1C(=O)OCc1cc(O)ccc1OC1OC(CO)C(O)C(O)C1O	L6000-Targetmol-Natural Compound Library-1680cpds	0.43934
CC1(OC(=O)C=Cc2ccccc2)CC(O)C2(O)C=COC(OC3OC(CO)C(O)C(O)C3O)C12	L6000-Targetmol-Natural Compound Library-1680cpds	0.52375
CC1(O)CC(O)C2(O)C=COC(OC3OC(CO)C(O)C(O)C3O)C12	L6000-Targetmol-Natural Compound Library-1680cpds	0.47451
CC(=O)OC1(C)CC(O)C2(O)C=COC(OC3OC(CO)C(O)C(O)C3O)C12	L6000-Targetmol-Natural Compound Library-1680cpds	0.517419
CC1CCC2(C(=O)O)CCC3(C)C(=CCC4C5(C)CCC(OC6OCC(O)C(O)C6O)C(C)(C)C5CCC43C)C2C1(C)O	L6000-Targetmol-Natural Compound Library-1680cpds	0.669118
O=C1OC2C3COC(=O)c4cc(O)c(O)c(O)c4-c4c(cc(O)c(O)c4O)C(=O)OC2C(OC(=O)c2cc(O)c(O)c4c2C2C1=CC(=O)C(O)(O4)C2(O)O)C(OC(=O)c1cc(O)c(O)c(O)c1)O3	L6000-Targetmol-Natural Compound Library-1680cpds	0.728228
CCCCCCC=CCCCCCCCc1cccc(O)c1C(=O)O	L6000-Targetmol-Natural Compound Library-1680cpds	0.43956
COc1ccc(-c2oc3c4c(cc(O)c3c(=O)c2O)OC(C)(C)CC4)cc1	L6000-Targetmol-Natural Compound Library-1680cpds	0.52603
COc1ccc(-c2oc3c(CC=C(C)C)c(OC4OC(CO)C(O)C(O)C4O)cc(O)c3c(=O)c2OC2OC(C)C(O)C(O)C2OC2OCC(O)C(O)C2O)cc1	L6000-Targetmol-Natural Compound Library-1680cpds	0.627145
COc1cc2oc(-c3ccc(O)cc3)cc(=O)c2c(O)c1C1OC(CO)C(O)C(O)C1OC1OC(CO)C(O)C(O)C1O	L6000-Targetmol-Natural Compound Library-1680cpds	0.58811
CC(=O)OC(CC(C)C1=C2CC(O)C3C4(C)CCC(=O)C(C)(C)C4CCC3(C)C2(C)CC1)C1OC1(C)C	L6000-Targetmol-Natural Compound Library-1680cpds	0.62462
CC(C)C1=CC2C(CCC2(C)O)C(C)(O)CC1	L6000-Targetmol-Natural Compound Library-1680cpds	0.48913
C=CC1C(OC2OC(CO)C(O)C(O)C2O)OC=C2C(=O)OCCC21	L6000-Targetmol-Natural Compound Library-1680cpds	0.473952
CC1CCC2(OC1)OC1CC3C4CC=C5CC(OC6OC(CO)C(O)C(O)C6OC6OC(C)C(O)C(O)C6O)CCC5(C)C4CCC3(C)C1(O)C2C	L6000-Targetmol-Natural Compound Library-1680cpds	0.550132
CN1Cc2c(ccc3c2OCO3)C2(C)C(O)Cc3cc4c(cc3C12)OCO4	L6000-Targetmol-Natural Compound Library-1680cpds	0.576841
O=C(C=Cc1ccc(O)c(O)c1)OC(C(=O)O)C(OC(=O)C=Cc1ccc(O)c(O)c1)C(=O)O	L6000-Targetmol-Natural Compound Library-1680cpds	0.509358
Nc1ncnc2c1ncn2C1OC2COP(=O)(O)OC2C1O	L6000-Targetmol-Natural Compound Library-1680cpds	0.521933
CC(=O)OCC=C(C)CCC=C(C)C	L6000-Targetmol-Natural Compound Library-1680cpds	0.425
Cc1ccc(C=O)o1	L6000-Targetmol-Natural Compound Library-1680cpds	0.357143
CC(C)=C1CCC(C)CC1=O	L6000-Targetmol-Natural Compound Library-1680cpds	0.390052
CCCCCc1ccco1	L6000-Targetmol-Natural Compound Library-1680cpds	0.450593
COc1ccc(C(=O)O)cc1	L6000-Targetmol-Natural Compound Library-1680cpds	0.397516
Oc1ccccc1	L6000-Targetmol-Natural Compound Library-1680cpds	0.5
CC(=O)C=Cc1ccccc1	L6000-Targetmol-Natural Compound Library-1680cpds	0.429185
COc1ccc(-c2oc3cc(OC)c(OC)c(O)c3c(=O)c2OC)cc1OC	L6000-Targetmol-Natural Compound Library-1680cpds	0.460503
CC(=O)CCc1ccccc1	L6000-Targetmol-Natural Compound Library-1680cpds	0.422222
CC(=O)c1ccccc1O	L6000-Targetmol-Natural Compound Library-1680cpds	0.424528
O=CCc1ccccc1	L6000-Targetmol-Natural Compound Library-1680cpds	0.5
O=C(O)Cc1cc(O)ccc1O	L6000-Targetmol-Natural Compound Library-1680cpds	0.498489
CC(=O)c1cc(O)ccc1O	L6000-Targetmol-Natural Compound Library-1680cpds	0.47561
CC1=CC2C(CC1)C(C)CCC2C(C)C(=O)O	L6000-Targetmol-Natural Compound Library-1680cpds	0.587258
CC(N)C(=O)O	L6000-Targetmol-Natural Compound Library-1680cpds	0.46875
CSCCC(N)C(=O)O	L6000-Targetmol-Natural Compound Library-1680cpds	0.341564
O=CC(O)C(O)C(O)C(O)C(=O)O	L6000-Targetmol-Natural Compound Library-1680cpds	0.318653
O.O=C(O)C1OC(O)C(O)C(O)C1O	L6000-Targetmol-Natural Compound Library-1680cpds	0.410334
CC(=O)OCC1=COC(OC(=O)CC(C)C)C2C1=CC(OC(=O)CC(C)(C)OC(C)=O)C21CO1	L6000-Targetmol-Natural Compound Library-1680cpds	0.532558
OCC1OC(OC2C(CO)OC(OC3C(CO)OC(OC4C(CO)OC(OC5C(CO)OC(O)C(O)C5O)C(O)C4O)C(O)C3O)C(O)C2O)C(O)C(O)C1O	L6000-Targetmol-Natural Compound Library-1680cpds	0.331928
CCOC(=O)c1cc2ccccc2oc1=O	L6000-Targetmol-Natural Compound Library-1680cpds	0.500513
Cc1cc(=O)oc2c([N+](=O)[O-])c(O)ccc12	L6000-Targetmol-Natural Compound Library-1680cpds	0.379351
Cc1cc(=O)oc2cc(O)cc(O)c12	L6000-Targetmol-Natural Compound Library-1680cpds	0.460594
Cc1cc(=O)oc2c(O)c(O)ccc12	L6000-Targetmol-Natural Compound Library-1680cpds	0.488753
Cc1cc(=O)oc2ccc(O)cc12	L6000-Targetmol-Natural Compound Library-1680cpds	0.401515
O=c1cc(-c2ccccc2)c2cc(O)c(O)cc2o1	L6000-Targetmol-Natural Compound Library-1680cpds	0.354756
Cc1cc(=O)oc2cc(O)c(O)cc12	L6000-Targetmol-Natural Compound Library-1680cpds	0.456033
O=C(O)c1cc2ccccc2oc1=O	L6000-Targetmol-Natural Compound Library-1680cpds	0.440245
Nc1ccc2c(C(F)(F)F)cc(=O)oc2c1	L6000-Targetmol-Natural Compound Library-1680cpds	0.482582
O=C1c2ccccc2C(=O)c2c1cc(O)c(CO)c2O	L6000-Targetmol-Natural Compound Library-1680cpds	0.388039
C1CNCCNCCNCCN1	L6000-Targetmol-Natural Compound Library-1680cpds	0.3125
CC(Cc1ccc(O)c(O)c1)C(C)Cc1ccc(O)c(O)c1	L6000-Targetmol-Natural Compound Library-1680cpds	0.52795
Cc1c(C)c2c(c(C)c1O)CCC(C)(CCCC(C)CCCC(C)CCCC(C)C)O2	L6000-Targetmol-Natural Compound Library-1680cpds	0.395062
O=c1ccn(C2OC(COP(=O)([O-])[O-])C(O)C2O)c(=O)[nH]1.[Na+].[Na+]	L6000-Targetmol-Natural Compound Library-1680cpds	0.4362
C=C1CC23CC1CCC2C12C=CC(O)C(C)(C(=O)O1)C2C3C(=O)O	L6000-Targetmol-Natural Compound Library-1680cpds	0.658083
O=c1[nH]c(=O)c2ncn(C3OC(CO)C(O)C3O)c2[nH]1	L6000-Targetmol-Natural Compound Library-1680cpds	0.506562
O=C(O)CCCCCCCCCO	L6000-Targetmol-Natural Compound Library-1680cpds	0.36
O=c1nc[nH]c2ccccc12	L6000-Targetmol-Natural Compound Library-1680cpds	0.512766
Nc1ccn(C2OC(COP(=O)(O)O)C(O)C2O)c(=O)n1	L6000-Targetmol-Natural Compound Library-1680cpds	0.433618
O=C1c2ccccc2C(=O)c2ccccc21	L6000-Targetmol-Natural Compound Library-1680cpds	0.482833
O=C(O)Cc1cccc2ccccc12	L6000-Targetmol-Natural Compound Library-1680cpds	0.378076
CC(C)C[C@H]1C(=O)N2CCC[C@H]2[C@]2(O)O[C@](NC(=O)[C@@H]3C[C@@H]4c5cccc6[nH]cc(c56)C[C@H]4N(C)C3)(C(C)C)C(=O)N12.CS(=O)(=O)O	L6000-Targetmol-Natural Compound Library-1680cpds	0.6706
COC1C(O)C(O)C(O)C(O)C1O	L6000-Targetmol-Natural Compound Library-1680cpds	0.482906
O=c1[nH]cnc2c1ncn2[C@@H]1O[C@H](COP(=O)(O[Na])O[Na])[C@H](O)C1O	L6000-Targetmol-Natural Compound Library-1680cpds	0.509032
C=C1C2CCC(C2)C1(C)C	L6000-Targetmol-Natural Compound Library-1680cpds	0.40884
CC(=CCNc1ncnc2nc[nH]c12)CO	L6000-Targetmol-Natural Compound Library-1680cpds	0.44973
CC(C=CC=C(C)C=CC1=C(C)CC(O)CC1(C)C)=CC=CC=C(C)C=CC=C(C)C=CC1=C(C)CC(O)CC1(C)C	L6000-Targetmol-Natural Compound Library-1680cpds	0.40669
CC(=CCNc1ncnc2c1ncn2C1OC(CO)C(O)C1O)CO	L6000-Targetmol-Natural Compound Library-1680cpds	0.526623
CC(CCC(=O)NCCS(=O)(=O)[O-])C1CCC2C3C(O)CC4CC(O)CCC4(C)C3CC(O)C12C.[Na+]	L6000-Targetmol-Natural Compound Library-1680cpds	0.409171
O=Cc1ccccc1	L6000-Targetmol-Natural Compound Library-1680cpds	0.413223
Nc1ccc(N(CCO)CCO)cc1.O=S(=O)(O)O	L6000-Targetmol-Natural Compound Library-1680cpds	0.386997
CCCCCCCCCCCCCCCC(=O)OCC(COC(=O)CCCCCCCCCCCCCCC)OC(=O)CCCCCCCCCCCCCCC	L6000-Targetmol-Natural Compound Library-1680cpds	0.389873
Cc1c[nH]c(=O)[nH]c1=O	L6000-Targetmol-Natural Compound Library-1680cpds	0.347548
Cc1cn(C2CC(O)C(CO)O2)c(=O)[nH]c1=O	L6000-Targetmol-Natural Compound Library-1680cpds	0.403571
CC1CCCC2=CC(=O)C3C(C3(C)C)C21C	L6000-Targetmol-Natural Compound Library-1680cpds	0.483304
CC1=CCC2(C(C)C)CCC(C)(O2)C(O)CCC(C)=CCC1	L6000-Targetmol-Natural Compound Library-1680cpds	0.462903
CC(=O)OC1CC(=O)OC(C)(C)[C@@H]2CC(=O)[C@]3(C)[C@H](CC[C@@]4(C)[C@H](c5ccoc5)OC(=O)[C@H]5O[C@]543)[C@@]12C	L6000-Targetmol-Natural Compound Library-1680cpds	0.528944
C=C1CCC[C@]2(C)CC[C@@H](C(C)(C)O)C[C@@H]12	L6000-Targetmol-Natural Compound Library-1680cpds	0.513966
COc1cc(O)ccc1/C=C/C(=O)c1ccc(O)cc1	L6000-Targetmol-Natural Compound Library-1680cpds	0.628866
COc1c2ccoc2c(OCC=C(C)C)c2oc(=O)ccc12	L6000-Targetmol-Natural Compound Library-1680cpds	0.375
C=C1C[C@@]23CC[C@H]4[C@@](C)(CCC[C@@]4(C)C(=O)O)[C@@H]2CC[C@@H]1C3	L6000-Targetmol-Natural Compound Library-1680cpds	0.638356
O=C(O)c1cccnc1C(=O)O	L6000-Targetmol-Natural Compound Library-1680cpds	0.381551
Cc1c(O)cc2c(c1O)C(=O)c1ccccc1C2=O	L6000-Targetmol-Natural Compound Library-1680cpds	0.388889
C[N+](C)(C)CCOP(=O)([O-])OC[C@H](O)CO	L6000-Targetmol-Natural Compound Library-1680cpds	0.345416
O=C(O)/C=C/CCCCCCCCC(=O)O	L6000-Targetmol-Natural Compound Library-1680cpds	0.382609
CC[C@H]1[C@@H]2C[C@H]3[C@@H]4N(C)c5ccccc5[C@]45C[C@@H](C2[C@H]5O)N3[C@@H]1O	L6000-Targetmol-Natural Compound Library-1680cpds	0.635338
O=C(/C=C/c1ccc(O)cc1)C1=C(O)[C@@](O)(C2O[C@H](CO)[C@@H](O)[C@H](O)[C@H]2O)C(=O)/C(=C\C2=C(O)[C@@](O)([C@@H]3O[C@H](CO)[C@@H](O)[C@H](O)[C@H]3O)C(O)=C(C(=O)/C=C/c3ccc(O)cc3)C2=O)C1=O	L6000-Targetmol-Natural Compound Library-1680cpds	0.571505
CCCCO	L6000-Targetmol-Natural Compound Library-1680cpds	0.203125
COC(=O)C1=CC[C@]23CC[C@H]([C@@]2(O)CC1)[C@@](C)(/C=C/C=C(\C)C(=O)O)OC3=O	L6000-Targetmol-Natural Compound Library-1680cpds	0.628453
NC[C@H](O)c1ccc(O)c(O)c1	L6000-Targetmol-Natural Compound Library-1680cpds	0.591195
CCCCCCCCCCCCCCCC(=O)OCC(O)COC(=O)CCCCCCCCCCCCCCC	L6000-Targetmol-Natural Compound Library-1680cpds	0.493562
COc1ccc2ccc(=O)oc2c1	L6000-Targetmol-Natural Compound Library-1680cpds	0.338747
CC1=C(C)C(=O)C(CC[C@](C)(O)CCC[C@H](C)CCC[C@H](C)CCCC(C)C)=C(C)C1=O	L6000-Targetmol-Natural Compound Library-1680cpds	0.363176
COc1cc2oc(-c3ccccc3)cc(=O)c2c(OC)c1OC	L6000-Targetmol-Natural Compound Library-1680cpds	0.395024
Oc1cc(O)cc(/C=C/c2c(O)cccc2O)c1	L6000-Targetmol-Natural Compound Library-1680cpds	0.435294
CCCCc1oc2ccc(NS(C)(=O)=O)cc2c1C(=O)c1ccc(OCCCN(CCCC)CCCC)cc1	L6000-Targetmol-Natural Compound Library-1680cpds	0.495789
CCCC(CCC)C(=O)O	L6000-Targetmol-Natural Compound Library-1680cpds	0.342105
COc1cc(/C=C/C(=O)O[C@@H]2[C@@H](CO[C@@H]3O[C@H](CO)[C@@H](O)[C@H](O)[C@H]3O)O[C@@H](OCCc3ccc(O)c(O)c3)[C@H](O)[C@H]2O[C@@H]2O[C@@H](C)[C@H](O)[C@@H](O)[C@H]2O)ccc1O	L6000-Targetmol-Natural Compound Library-1680cpds	0.473684
N[C@@H](CNC(=O)C(=O)O)C(=O)O	L6000-Targetmol-Natural Compound Library-1680cpds	0.337398
O=C1C[C@@H](c2ccc(O[C@@H]3O[C@H](CO)[C@@H](O)[C@H](O)[C@H]3O[C@@H]3OC[C@](O)(CO)[C@H]3O)cc2)Oc2cc(O)ccc21	L6000-Targetmol-Natural Compound Library-1680cpds	0.599842
CC1=CCC2CC1C2(C)C	L6000-Targetmol-Natural Compound Library-1680cpds	0.473538
O=C(/C=C/c1ccc(O)c(O)c1)O[C@@H]1CC(O)(C(=O)O)C[C@@H](OC(=O)/C=C/c2ccc(O)c(O)c2)C1O	L6000-Targetmol-Natural Compound Library-1680cpds	0.497517
O=C(/C=C/c1ccc(O)c(O)c1)O[C@@H](C(=O)O)[C@@H](OC(=O)/C=C/c1ccc(O)c(O)c1)C(=O)O	L6000-Targetmol-Natural Compound Library-1680cpds	0.509358
O=C(/C=C/c1ccc(O)cc1)CC(=O)/C=C/c1ccc(O)cc1	L6000-Targetmol-Natural Compound Library-1680cpds	0.416862
COc1cc(O)cc(CCc2ccc(OC)c(O)c2)c1	L6000-Targetmol-Natural Compound Library-1680cpds	0.548673
COc1cc(/C=C/CO)ccc1O[C@@H]1O[C@H](CO)[C@@H](O)[C@H](O)[C@H]1O	L6000-Targetmol-Natural Compound Library-1680cpds	0.402802
COc1cc(/C=C/CO)ccc1O	L6000-Targetmol-Natural Compound Library-1680cpds	0.471783
O=c1c(-c2ccc(O)cc2)coc2c([C@@H]3O[C@H](CO[C@@H]4OC[C@](O)(CO)[C@H]4O)[C@@H](O)[C@H](O)[C@H]3O)c(O)ccc12	L6000-Targetmol-Natural Compound Library-1680cpds	0.586007
COC(=O)[C@@H](Cc1ccc(O)c(O)c1)OC(=O)/C=C/c1ccc(O)c2c1[C@H](C(=O)O[C@H](Cc1ccc(O)c(O)c1)C(=O)O)[C@@H](c1ccc(O)c(O)c1)O2	L6000-Targetmol-Natural Compound Library-1680cpds	0.583914
COc1c(C)c(O)cc2[o+]c(-c3ccccc3)ccc12.[O-][Cl+3]([O-])([O-])O	L6000-Targetmol-Natural Compound Library-1680cpds	0.371212
C/C=C(/C)C(=O)O[C@@H]1c2c(ccc3ccc(=O)oc23)OC(C)(C)[C@@H]1OC(C)=O	L6000-Targetmol-Natural Compound Library-1680cpds	0.578723
C[C@@H](CO)[C@@H]1CC[C@@]2(CC[C@]3(C)[C@H](CC[C@@H]4[C@@]5(C)CC[C@H](O[C@@H]6O[C@H](CO)[C@@H](O)[C@H](O)[C@H]6O[C@@H]6O[C@H](CO)[C@@H](O)[C@H](O)[C@H]6O)[C@@](C)(CO[C@@H]6O[C@H](CO)[C@@H](O)[C@H](O)[C@H]6O)[C@@H]5CC[C@]43C)[C@H]2O)CO1	L6000-Targetmol-Natural Compound Library-1680cpds	0.511834
C[C@@H](CO[C@@H]1O[C@H](CO)[C@@H](O)[C@H](O)[C@H]1O)[C@@H]1CC[C@@]2(CC[C@]3(C)[C@H](CC[C@@H]4[C@@]5(C)CC[C@H](O[C@@H]6O[C@H](CO)[C@@H](O)[C@H](O)[C@H]6O[C@@H]6O[C@H](CO)[C@@H](O)[C@H](O)[C@H]6O)[C@@](C)(CO[C@@H]6O[C@H](CO)[C@@H](O)[C@H](O)[C@H]6O)[C@@H]5CC[C@]43C)[C@H]2O)CO1	L6000-Targetmol-Natural Compound Library-1680cpds	0.511834
C[C@@H]1O[C@@H](O[C@H]2[C@H](OC(=O)[C@]34CCC(C)(C)C[C@H]3C3=CC[C@@H]5[C@@]6(C)C[C@H](O)[C@H](O[C@@H]7O[C@H](CO)[C@@H](O)[C@H](O)[C@H]7O)[C@@](C)(CO)[C@@H]6CC[C@@]5(C)[C@]3(C)CC4)O[C@H](CO)[C@@H](O)[C@@H]2O)[C@H](O)[C@H](O[C@@H]2OC[C@](O)(CO)[C@H]2O)[C@H]1O[C@@H]1OC[C@@H](O)[C@H](O)[C@H]1O	L6000-Targetmol-Natural Compound Library-1680cpds	0.653425
CO[C@@H]1C[C@@H](O[C@H]2CC[C@]3(C)C4[C@H](OC(=O)c5ccccc5)[C@@H](OC(C)=O)[C@]5(C)[C@H](C(C)=O)CC[C@@]56O[C@@]46CC[C@H]3C2)O[C@H](C)[C@H]1O[C@@H]1O[C@H](C)[C@@H](O)[C@@H](OC)[C@H]1O	L6000-Targetmol-Natural Compound Library-1680cpds	0.508475
C[C@@H]1CC[C@]2(C(=O)O)CC[C@]3(C)C(=CC[C@@H]4[C@@]5(C)CC[C@H](O)[C@@](C)(CO)[C@@H]5CC[C@]43C)[C@@H]2[C@]1(C)O	L6000-Targetmol-Natural Compound Library-1680cpds	0.73357
CC(=O)O[C@H](C[C@@H](C)[C@H]1C(=O)[C@H](O)[C@@]2(C)[C@@H]3CC[C@H]4C(C)(C)[C@@H](O[C@@H]5OC[C@H](O)[C@H](O)[C@H]5O)CC[C@@]45C[C@@]35CC[C@]12C)C1OC1(C)C	L6000-Targetmol-Natural Compound Library-1680cpds	0.505435
COc1c2ccoc2c(OC)c2oc(=O)ccc12	L6000-Targetmol-Natural Compound Library-1680cpds	0.349351
COC1=CC(=O)O[C@@H](/C=C/c2ccccc2)C1	L6000-Targetmol-Natural Compound Library-1680cpds	0.399137
O=C(O[C@H]1[C@H](Oc2c(-c3ccc(O)c(O)c3)oc3cc(O)cc(O)c3c2=O)O[C@H](CO)[C@H](O)[C@@H]1O)c1cc(O)c(O)c(O)c1	L6000-Targetmol-Natural Compound Library-1680cpds	0.593042
O=c1cc(-c2ccccc2)oc2cc(O[C@@H]3O[C@H](CO)[C@@H](O)[C@H](O)[C@H]3O)c(O)c(O)c12	L6000-Targetmol-Natural Compound Library-1680cpds	0.487047
COC1=CC(=O)O[C@@H](CCc2ccccc2)C1	L6000-Targetmol-Natural Compound Library-1680cpds	0.396875
C[C@H]1CC[C@]2(NC1)O[C@H]1C[C@H]3[C@@H]4CC[C@H]5C[C@@H](O)CC[C@]5(C)[C@H]4CC[C@]3(C)C1[C@@H]2C.Cl	L6000-Targetmol-Natural Compound Library-1680cpds	0.453652
COc1cc(/C=C/C(=O)O[C@@H]2[C@@H]3O[C@]3(CO)C3[C@H](O[C@@H]4O[C@H](CO)[C@@H](O)[C@H](O)[C@H]4O)OC=C[C@H]32)ccc1O	L6000-Targetmol-Natural Compound Library-1680cpds	0.52019
C=C1CCC[C@]2(C)Cc3occ(C)c3C[C@@H]12	L6000-Targetmol-Natural Compound Library-1680cpds	0.40678
COc1ccc2c3ccnc4ccc(=O)n(c2c1)c43	L6000-Targetmol-Natural Compound Library-1680cpds	0.370697
CC(=O)O[C@@H]1C2[C@@H](OC(=O)Cc3ccccc3)[C@@H](C)C[C@]2(OC(C)=O)C(=O)C(C)=C[C@@H]2[C@H](CC[C@]13CO3)C2(C)C	L6000-Targetmol-Natural Compound Library-1680cpds	0.542998
C=C1C(=O)O[C@@H]2/C=C(\C)[C@@H](OC(C)=O)C/C=C(\COC(C)=O)C[C@@H](OC(=O)/C(C)=C/CO)[C@@H]12	L6000-Targetmol-Natural Compound Library-1680cpds	0.550882
CC(C)=CCC[C@](C)(O[C@@H]1O[C@H](CO[C@@H]2O[C@@H](CO)[C@H](O)[C@H]2O)[C@@H](O)[C@H](O)[C@H]1O)C1CC[C@]2(C)C1[C@H](O)C[C@@H]1[C@@]3(C)CC[C@H](O[C@@H]4O[C@H](CO)[C@@H](O)[C@H](O)[C@H]4O)C(C)(C)[C@@H]3CC[C@]12C	L6000-Targetmol-Natural Compound Library-1680cpds	0.518142
C=C1[C@@H](O)[C@]2(O)OC[C@]34C2[C@@]2(C)[C@H](O)C(=O)C=C(C)[C@@H]2C[C@H]3OC(=O)[C@H](O)[C@@]14O	L6000-Targetmol-Natural Compound Library-1680cpds	0.594022
CC(=O)O[C@@H]1[C@@H](O[C@@H]2O[C@@H](C)[C@H](O)[C@@H](O)[C@H]2O)[C@H](OC(=O)/C=C/c2ccc(O)c(O)c2)[C@@H](CO[C@@H]2O[C@H](CO)[C@@H](O)[C@H](O)[C@H]2O)O[C@H]1OCCc1ccc(O)c(O)c1	L6000-Targetmol-Natural Compound Library-1680cpds	0.438441
COC(=O)C1=CO[C@@H](O[C@@H]2O[C@H](CO)[C@@H](O)[C@H](O)[C@H]2O)C2[C@@]3(C)O[C@H]3[C@@H](O)[C@]12O	L6000-Targetmol-Natural Compound Library-1680cpds	0.523865
O=c1cc(-c2ccc(O)cc2)oc2c([C@@H]3O[C@H](CO)[C@@H](O[C@@H]4O[C@H](CO)[C@@H](O)[C@H](O)[C@H]4O)[C@H](O)[C@H]3O)c(O)cc(O)c12	L6000-Targetmol-Natural Compound Library-1680cpds	0.606204
CC(=O)OCC1=CO[C@@H](OC(=O)CC(C)C)[C@H]2C1=C[C@H](OC(=O)CC(C)C)[C@]21CO1	L6000-Targetmol-Natural Compound Library-1680cpds	0.536385
COc1ccc(-c2cc(=O)c3c(OC)c(OC)c(OC)cc3o2)cc1OC	L6000-Targetmol-Natural Compound Library-1680cpds	0.422594
COc1ccc2cc3[n+](cc2c1OC)CCc1cc(O)c(O)cc1-3	L6000-Targetmol-Natural Compound Library-1680cpds	0.497379
COC(=O)C1=CO[C@@H](O[C@@H]2O[C@H](CO)[C@@H](O)[C@H](O)[C@H]2O)C2[C@@H]1[C@H](O)C[C@]2(C)OC(C)=O	L6000-Targetmol-Natural Compound Library-1680cpds	0.542579
COc1c2c(cc3c1-c1c(cc4c(c1OC)OCO4)C[C@@H](C)[C@@H](C)C3)OCO2	L6000-Targetmol-Natural Compound Library-1680cpds	0.428571
COC(=O)[C@@]1(C)CC[C@]2(C(=O)O[C@@H]3O[C@H](CO)[C@@H](O)[C@H](O)[C@H]3O)CC[C@]3(C)C(=CC[C@@H]4[C@@]5(C)C[C@H](O)[C@H](O[C@@H]6OC[C@@H](O[C@@H]7O[C@H](CO)[C@@H](O)[C@H](O)[C@H]7O)[C@H](O)[C@H]6O)[C@@](C)(CO)[C@@H]5CC[C@]43C)[C@@H]2C1	L6000-Targetmol-Natural Compound Library-1680cpds	0.682014
OC[C@H]1O[C@@H](Oc2ccc3c(c2)OC[C@H]2c4cc5c(cc4O[C@@H]32)OCO5)[C@H](O)[C@@H](O)[C@@H]1O	L6000-Targetmol-Natural Compound Library-1680cpds	0.528261
COc1cc(/C=C/C(=O)OC[C@H]2O[C@@H](O[C@H]3[C@H](c4c(OC)cc5oc(-c6ccc(O)cc6)cc(=O)c5c4O)O[C@H](CO)[C@@H](O)[C@@H]3O)[C@H](O)[C@@H](O)[C@@H]2O)ccc1O	L6000-Targetmol-Natural Compound Library-1680cpds	0.613971
C=C1CC[C@@H]2[C@](C)(COC(=O)CCC(=O)O)[C@H](OC(=O)CCC(=O)O)CC[C@@]2(C)[C@@H]1/C=C/C1=CCOC1=O	L6000-Targetmol-Natural Compound Library-1680cpds	0.637795
CC(C)=CCC[C@](C)(O)[C@H]1CC[C@]2(C)C1[C@H](O)C[C@@H]1[C@@]3(C)CC[C@H](O)C(C)(C)[C@@H]3[C@@H](O[C@@H]3O[C@H](CO)[C@@H](O)[C@H](O)[C@H]3O[C@@H]3OC[C@@H](O)[C@H](O)[C@H]3O)C[C@]12C	L6000-Targetmol-Natural Compound Library-1680cpds	0.536337
COc1cc2c(cc1O)C[C@H]1c3cc(O)c(OC)cc3CC[N+]1(C)C2.[Cl-]	L6000-Targetmol-Natural Compound Library-1680cpds	0.405494
CCC/C=C1\OC(=O)C2=C1CCC=C2	L6000-Targetmol-Natural Compound Library-1680cpds	0.466527
COc1ccc(-c2cc(=O)c3c(O)cc(O)c(-c4cc(-c5cc(=O)c6c(O)cc(OC)cc6o5)ccc4OC)c3o2)cc1	L6000-Targetmol-Natural Compound Library-1680cpds	0.471284
C[C@H](CCC(=O)NCCS(=O)(=O)O)[C@H]1CC[C@H]2[C@H]3[C@H](CC[C@@]21C)[C@@]1(C)CC[C@@H](O)C[C@H]1C[C@H]3O	L6000-Targetmol-Natural Compound Library-1680cpds	0.389381
C=C[C@H]1[C@H](O[C@@H]2O[C@H](CO)[C@@H](O)[C@H](O)[C@H]2O)OC=C(C(=O)OC)[C@H]1CC(=O)O	L6000-Targetmol-Natural Compound Library-1680cpds	0.468193
COc1cc([C@H]2OC[C@@H]3[C@@H](c4ccc(O[C@@H]5O[C@H](CO)[C@@H](O)[C@H](O)[C@H]5O)c(OC)c4)OC[C@H]23)ccc1O	L6000-Targetmol-Natural Compound Library-1680cpds	0.467569
C[C@@H]1O[C@@H](O[C@@H]2[C@@H](O)[C@H](OCCc3ccc(O)c(O)c3)O[C@H](CO[C@@H]3O[C@@H](C)[C@H](O)[C@@H](O)[C@H]3O)[C@H]2OC(=O)/C=C/c2ccc(O)c(O)c2)[C@H](O)[C@H](O)[C@H]1O	L6000-Targetmol-Natural Compound Library-1680cpds	0.43711
COc1cc2c(cc1OC)[C@@]13CCN4CC5=CCO[C@H]6CC(=O)N2[C@H]1C6[C@H]5C[C@H]43	L6000-Targetmol-Natural Compound Library-1680cpds	0.683938
O=C1C[C@@H]2OCC=C3CN4CC[C@]56c7ccccc7N1[C@H]5C2[C@H]3C[C@H]46	L6000-Targetmol-Natural Compound Library-1680cpds	0.664214
Oc1ccc(O)cc1	L6000-Targetmol-Natural Compound Library-1680cpds	0.338843
CNC[C@H](O)c1ccc(O)c(O)c1.O=C(O)[C@@H](O)[C@@H](O)C(=O)O	L6000-Targetmol-Natural Compound Library-1680cpds	0.457701
CNC[C@H](O)c1ccc(O)c(O)c1	L6000-Targetmol-Natural Compound Library-1680cpds	0.595679
C[C@H]1O[C@@H](O[C@H]2[C@@H](O)C[C@H](O[C@H]3[C@@H](O)C[C@H](O[C@H]4CC[C@]5(C)[C@H]6C[C@@H](O)[C@]7(C)[C@@H](C8=CC(=O)OC8)CC[C@]7(O)[C@@H]6CC[C@@H]5C4)O[C@@H]3C)O[C@@H]2C)C[C@H](O)[C@@H]1O	L6000-Targetmol-Natural Compound Library-1680cpds	0.579915
C[C@@H]1CC([C@H](O)CC2CC(=O)NC(=O)C2)C(=O)[C@@H](C)C1	L6000-Targetmol-Natural Compound Library-1680cpds	0.503722
C[C@@H]1O[C@@H](O[C@H]2C[C@@H](O)[C@]3(CO)C4[C@H](O)C[C@]5(C)[C@@H](C6=CC(=O)OC6)CC[C@]5(O)[C@@H]4CC[C@]3(O)C2)[C@H](O)[C@H](O)[C@H]1O.O.O.O.O.O.O.O.O	L6000-Targetmol-Natural Compound Library-1680cpds	0.574438
C=C(C)C1CC=C(C)CC1	L6000-Targetmol-Natural Compound Library-1680cpds	0.447826
CCCCCC[C@H]1C(=O)O[C@H](C)[C@H](NC(=O)c2cccc(NC=O)c2O)C(=O)O[C@@H](C)[C@@H]1OC(=O)CC(C)C	L6000-Targetmol-Natural Compound Library-1680cpds	0.491879
CC12CCC(CC1)C(C)(C)O2	L6000-Targetmol-Natural Compound Library-1680cpds	0.432361
CCN1C[C@@]2(COC)C3[C@@H](OC)[C@H]4C1[C@]3([C@@H](OC)C[C@H]2O)[C@@H]1C[C@@]2(O)[C@@H](OC)[C@H](O)[C@@]4(OC(C)=O)C1[C@H]2OC(=O)c1ccccc1	L6000-Targetmol-Natural Compound Library-1680cpds	0.510689
CN1CCC[C@H]1c1cccnc1	L6000-Targetmol-Natural Compound Library-1680cpds	0.397019
C[C@]12C(=O)OC(=O)[C@@]1(C)[C@@H]1CC[C@H]2O1	L6000-Targetmol-Natural Compound Library-1680cpds	0.5936
CC1(C)C2CCC1(C)C(O)C2	L6000-Targetmol-Natural Compound Library-1680cpds	0.415761
C=C(C)[C@H]1CC=C(C)CC1	L6000-Targetmol-Natural Compound Library-1680cpds	0.447826
COc1ccc2c(c1OC)CN(C)CCc1cc3c(cc1C(=O)C2)OCO3	L6000-Targetmol-Natural Compound Library-1680cpds	0.422978
CC1(C)C=Cc2cc(-c3coc4cc(O)ccc4c3=O)ccc2O1	L6000-Targetmol-Natural Compound Library-1680cpds	0.420307
Cn1cncc1C[C@H](NC(=O)CCN)C(=O)O.O=[N+]([O-])O	L6000-Targetmol-Natural Compound Library-1680cpds	0.487526
O=C(O)Cc1ccc(O)c(O)c1	L6000-Targetmol-Natural Compound Library-1680cpds	0.546926
Nc1ccn([C@H]2C[C@H](O)[C@@H](COP(=O)(O)O)O2)c(=O)n1	L6000-Targetmol-Natural Compound Library-1680cpds	0.395514
COC(=O)CC(C)=O	L6000-Targetmol-Natural Compound Library-1680cpds	0.433071
O=C(O)/C=C/c1c[nH]cn1	L6000-Targetmol-Natural Compound Library-1680cpds	0.321429
NCCOP(=O)(O)O	L6000-Targetmol-Natural Compound Library-1680cpds	0.362903
CCOC(=O)CC(=O)O	L6000-Targetmol-Natural Compound Library-1680cpds	0.464567
O=C(O)/C=C\C(=O)O	L6000-Targetmol-Natural Compound Library-1680cpds	0.307087
O=C(O)CCCCCC(=O)O	L6000-Targetmol-Natural Compound Library-1680cpds	0.36
NC(=O)c1ccc[n+]([C@@H]2O[C@H](COP(=O)([O-])O)[C@@H](O)[C@H]2O)c1	L6000-Targetmol-Natural Compound Library-1680cpds	0.40434
CC(C)=CCC/C(C)=C\CC/C(C)=C/CC/C=C(\C)CC/C=C(\C)CCC=C(C)C	L6000-Targetmol-Natural Compound Library-1680cpds	0.433071
CCCCCCCCC(=O)O	L6000-Targetmol-Natural Compound Library-1680cpds	0.36
CSCCC(NC(C)=O)C(=O)O	L6000-Targetmol-Natural Compound Library-1680cpds	0.381551
O=C(O)CCCC(=O)O	L6000-Targetmol-Natural Compound Library-1680cpds	0.330709
CCCCCCC(=O)O	L6000-Targetmol-Natural Compound Library-1680cpds	0.36
CCCCC(CC)COC(=O)c1ccccc1C(=O)OCC(CC)CCCC	L6000-Targetmol-Natural Compound Library-1680cpds	0.454259
CC(=O)N[C@@H](CC(C)C)C(=O)O	L6000-Targetmol-Natural Compound Library-1680cpds	0.378661
c1ccc2[nH]ccc2c1	L6000-Targetmol-Natural Compound Library-1680cpds	0.456349
c1ncc2[nH]cnc2n1	L6000-Targetmol-Natural Compound Library-1680cpds	0.325911
Cc1cnc(C)cn1	L6000-Targetmol-Natural Compound Library-1680cpds	0.464567
CCCCCCCC(=O)O	L6000-Targetmol-Natural Compound Library-1680cpds	0.36
CC(=O)C(=O)O	L6000-Targetmol-Natural Compound Library-1680cpds	0.453125
NCCO	L6000-Targetmol-Natural Compound Library-1680cpds	0.1875
Oc1ccccn1	L6000-Targetmol-Natural Compound Library-1680cpds	0.491803
CCCCCC(=O)O	L6000-Targetmol-Natural Compound Library-1680cpds	0.328
C[C@H](O)c1ccccc1	L6000-Targetmol-Natural Compound Library-1680cpds	0.393519
O=C(O)[C@@H](O)[C@H](O)C(=O)O	L6000-Targetmol-Natural Compound Library-1680cpds	0.366667
COc1cc(CCN)ccc1O.Cl	L6000-Targetmol-Natural Compound Library-1680cpds	0.606452
O=C[C@@H](O)[C@H](O)[C@H](O)CO	L6000-Targetmol-Natural Compound Library-1680cpds	0.345833
COC(=O)CCCC(=O)O	L6000-Targetmol-Natural Compound Library-1680cpds	0.456693
N[C@H](Cc1c[nH]c2ccccc12)C(=O)O	L6000-Targetmol-Natural Compound Library-1680cpds	0.459239
N[C@H](CC(=O)O)C(=O)O	L6000-Targetmol-Natural Compound Library-1680cpds	0.325397
CC(=O)N[C@H]1[C@@H](O)O[C@H](CO)[C@H](O)[C@@H]1O	L6000-Targetmol-Natural Compound Library-1680cpds	0.487153
COC(=O)Cc1c[nH]c2ccccc12	L6000-Targetmol-Natural Compound Library-1680cpds	0.432471
NCCP(=O)(O)O	L6000-Targetmol-Natural Compound Library-1680cpds	0.330709
CC(=O)N[C@@H](Cc1ccccc1)C(=O)O	L6000-Targetmol-Natural Compound Library-1680cpds	0.509128
CNC(=N)N.Cl	L6000-Targetmol-Natural Compound Library-1680cpds	0.234375
C[C@H](CCCC(C)(C)O)C1CCC2[C@@H]3CC=C4C[C@@H](O)CC[C@]4(C)C3CC[C@@]21C	L6000-Targetmol-Natural Compound Library-1680cpds	0.657682
NC1(C(=O)O)CC1	L6000-Targetmol-Natural Compound Library-1680cpds	0.326531
O=C(O)c1cnc(O)nc1O	L6000-Targetmol-Natural Compound Library-1680cpds	0.506073
OC1COC(O)CO1	L6000-Targetmol-Natural Compound Library-1680cpds	0.432
NCCCCN=C(N)N.O=S(=O)(O)O	L6000-Targetmol-Natural Compound Library-1680cpds	0.41129
C/C=C/C=C/C(=O)[O-].[K+]	L6000-Targetmol-Natural Compound Library-1680cpds	0.336
C[C@@H](O)[C@@H](C)O	L6000-Targetmol-Natural Compound Library-1680cpds	0.265625
O=C(O)[C@H]1C[C@@H](O)CN1	L6000-Targetmol-Natural Compound Library-1680cpds	0.371608
O.O=c1ccn([C@@H]2O[C@H](COP(=O)([O-])OP(=O)([O-])O)[C@@H](O)[C@H]2O)c(=O)[nH]1.[Na+].[Na+]	L6000-Targetmol-Natural Compound Library-1680cpds	0.458241
O.O=c1ccn([C@@H]2O[C@H](COP(=O)([O-])OP(=O)([O-])O[C@H]3O[C@H](CO)[C@@H](O)[C@H](O)[C@H]3O)[C@@H](O)[C@H]2O)c(=O)[nH]1.[Na+].[Na+]	L6000-Targetmol-Natural Compound Library-1680cpds	0.516848
c1cncnc1	L6000-Targetmol-Natural Compound Library-1680cpds	0.40625
O=C(O)c1cccc(O)c1O	L6000-Targetmol-Natural Compound Library-1680cpds	0.488235
O=C(O)[C@@H]1CCCCN1	L6000-Targetmol-Natural Compound Library-1680cpds	0.318658
NCCC(=O)N[C@@H](Cc1cnc[nH]1)C(=O)O	L6000-Targetmol-Natural Compound Library-1680cpds	0.409283
Nc1nc(=O)c2ncn([C@H]3C[C@H](O)[C@@H](CO)O3)c2[nH]1.O	L6000-Targetmol-Natural Compound Library-1680cpds	0.530753
Cl.O=C(O)Cc1cnc[nH]1	L6000-Targetmol-Natural Compound Library-1680cpds	0.488095
CCCC[C@H](N)C(=O)O	L6000-Targetmol-Natural Compound Library-1680cpds	0.310204
C[C@@H](N)C(=O)O	L6000-Targetmol-Natural Compound Library-1680cpds	0.46875
Cc1cn([C@H]2C[C@H](O)[C@@H](COP(=O)([O-])[O-])O2)c(=O)[nH]c1=O.O.[Na+].[Na+]	L6000-Targetmol-Natural Compound Library-1680cpds	0.419989
NC(=O)NCCC[C@H](N)C(=O)O	L6000-Targetmol-Natural Compound Library-1680cpds	0.449393
CCC=CCC1C(=O)CCC1CC(=O)OC	L6000-Targetmol-Natural Compound Library-1680cpds	0.502618
O=C1CCC(C(=O)O)N1	L6000-Targetmol-Natural Compound Library-1680cpds	0.383367
CSCC[C@@H](NC=O)C(=O)O	L6000-Targetmol-Natural Compound Library-1680cpds	0.527559
O=c1ccn([C@H]2C[C@H](O)[C@@H](COP(=O)([O-])[O-])O2)c(=O)[nH]1.[Na+].[Na+]	L6000-Targetmol-Natural Compound Library-1680cpds	0.39455
CC(=O)C(C)=O	L6000-Targetmol-Natural Compound Library-1680cpds	0.296875
Cc1ccc(O)c(O)c1	L6000-Targetmol-Natural Compound Library-1680cpds	0.478673
O=C(O)CNC(=O)c1ccccc1	L6000-Targetmol-Natural Compound Library-1680cpds	0.388535
O=C(O)CCCCCCC(=O)O	L6000-Targetmol-Natural Compound Library-1680cpds	0.36
CCCCCCCCCCCCCCCCC(=O)O	L6000-Targetmol-Natural Compound Library-1680cpds	0.36
O=C(O)c1ccc(O)nc1	L6000-Targetmol-Natural Compound Library-1680cpds	0.440162
O=C(O)CCCCCCCCCCCO	L6000-Targetmol-Natural Compound Library-1680cpds	0.36
O=C[C@H](O)[C@H](O)[C@H](O)CO	L6000-Targetmol-Natural Compound Library-1680cpds	0.345833
CCCCCCCCCCCCCCCCCCCC(=O)O	L6000-Targetmol-Natural Compound Library-1680cpds	0.36
CC(C(=O)O)C(=O)O	L6000-Targetmol-Natural Compound Library-1680cpds	0.403226
Cc1ncc(CO)c(CN)c1O.Cl.Cl	L6000-Targetmol-Natural Compound Library-1680cpds	0.42061
OCCc1c[nH]c2ccccc12	L6000-Targetmol-Natural Compound Library-1680cpds	0.410256
O=C(O)C1CCCCN1	L6000-Targetmol-Natural Compound Library-1680cpds	0.318658
OC[C@@H]1O[C@H](O)C[C@H]1O	L6000-Targetmol-Natural Compound Library-1680cpds	0.530864
NC(CCCC(=O)O)C(=O)O	L6000-Targetmol-Natural Compound Library-1680cpds	0.355102
O=C[C@H](O)[C@@H](O)[C@H](O)[C@H](O)COP(=O)([O-])O.[Na+]	L6000-Targetmol-Natural Compound Library-1680cpds	0.421268
O=C(O)Cc1c[nH]c2ccc(O)cc12	L6000-Targetmol-Natural Compound Library-1680cpds	0.466484
CC(=O)NCC(=O)O	L6000-Targetmol-Natural Compound Library-1680cpds	0.443548
Nc1c(O)cccc1C(=O)O	L6000-Targetmol-Natural Compound Library-1680cpds	0.512249
Nc1nc2c(ncn2[C@@H]2O[C@H](COP(=O)([O-])[O-])[C@@H](O)[C@H]2O)c(=O)[nH]1.O.[Na+].[Na+]	L6000-Targetmol-Natural Compound Library-1680cpds	0.537718
CC(C)=CCO	L6000-Targetmol-Natural Compound Library-1680cpds	0.328125
OCC(O)CO	L6000-Targetmol-Natural Compound Library-1680cpds	0.25
O.O=CC(=O)O	L6000-Targetmol-Natural Compound Library-1680cpds	0.25
O=C(CO)[C@@H](O)[C@H](O)[C@H](O)CO	L6000-Targetmol-Natural Compound Library-1680cpds	0.520661
OC[C@H]1O[C@H](O[C@]2(CO)O[C@H](CO)[C@@H](O)[C@@H]2O)[C@H](O)[C@@H](O)[C@@H]1O	L6000-Targetmol-Natural Compound Library-1680cpds	0.410623
CN(CC(=O)O)C(=N)N	L6000-Targetmol-Natural Compound Library-1680cpds	0.353175
Cc1cc2nc[nH]c2cc1C	L6000-Targetmol-Natural Compound Library-1680cpds	0.432432
OC1OC[C@@H](O)[C@H](O)[C@H]1O	L6000-Targetmol-Natural Compound Library-1680cpds	0.381818
O=c1ccn([C@@H]2O[C@H](COP(=O)(O)O)[C@@H](O)[C@H]2O)c(=O)[nH]1	L6000-Targetmol-Natural Compound Library-1680cpds	0.4362
Cl.N[C@@H](Cc1cnc[nH]1)C(=O)O.O	L6000-Targetmol-Natural Compound Library-1680cpds	0.427984
O=C1C[C@@H](C(=O)O)NC(=O)N1	L6000-Targetmol-Natural Compound Library-1680cpds	0.526423
C[C@H]1C(=O)OCC1(C)C	L6000-Targetmol-Natural Compound Library-1680cpds	0.538136
CN(C)C.Cl	L6000-Targetmol-Natural Compound Library-1680cpds	0.09375
CC(C)(O)C(=O)O	L6000-Targetmol-Natural Compound Library-1680cpds	0.370079
OCc1cccc(O)c1	L6000-Targetmol-Natural Compound Library-1680cpds	0.455399
CC(C)(N)C(=O)O	L6000-Targetmol-Natural Compound Library-1680cpds	0.384
CC(CC(=O)O)CC(=O)O	L6000-Targetmol-Natural Compound Library-1680cpds	0.480315
O=C(O)Cc1cccc(O)c1	L6000-Targetmol-Natural Compound Library-1680cpds	0.452769
O=C1O[C@@H]([C@H](O)CO)[C@@H](O)[C@H]1O	L6000-Targetmol-Natural Compound Library-1680cpds	0.506986
CSCC[C@H](N)C(=O)O	L6000-Targetmol-Natural Compound Library-1680cpds	0.341564
O=C(O)c1ccc[nH]1	L6000-Targetmol-Natural Compound Library-1680cpds	0.477679
Nc1ncnc2c1ncn2[C@H]1C[C@H](O)[C@@H](COP(=O)(O)O)O1	L6000-Targetmol-Natural Compound Library-1680cpds	0.501017
Cc1ncc(CO)c(C=O)c1O.Cl	L6000-Targetmol-Natural Compound Library-1680cpds	0.424065
CCC[C@H](N)C(=O)O	L6000-Targetmol-Natural Compound Library-1680cpds	0.456693
CC(=O)OC[C@H](N)C(=O)O.Cl	L6000-Targetmol-Natural Compound Library-1680cpds	0.42126
N[C@@H](CCO)C(=O)O	L6000-Targetmol-Natural Compound Library-1680cpds	0.464567
NCCCCC(=O)O	L6000-Targetmol-Natural Compound Library-1680cpds	0.36
Nc1ccnc(=O)[nH]1	L6000-Targetmol-Natural Compound Library-1680cpds	0.392857
C[N+](C)(C)CCOP(=O)([O-])[O-].O.O.O.O.[Ca+2].[Cl-]	L6000-Targetmol-Natural Compound Library-1680cpds	0.324111
CCOC(=O)C(=O)C(C)C(=O)OCC	L6000-Targetmol-Natural Compound Library-1680cpds	0.43038
NC=O	L6000-Targetmol-Natural Compound Library-1680cpds	0.078125
CC(=O)N[C@@H]1[C@H](O)O[C@H](CO)[C@@H](O)[C@@H]1O	L6000-Targetmol-Natural Compound Library-1680cpds	0.487153
CCC(=O)O	L6000-Targetmol-Natural Compound Library-1680cpds	0.3125
C[C@H](O)C(=O)O	L6000-Targetmol-Natural Compound Library-1680cpds	0.421875
CC(=O)NC(Cc1c[nH]c2ccccc12)C(=O)O	L6000-Targetmol-Natural Compound Library-1680cpds	0.344072
O=C(CO)[C@@H](O)[C@@H](O)[C@H](O)CO	L6000-Targetmol-Natural Compound Library-1680cpds	0.520661
NC(=O)Cc1c[nH]c2ccccc12	L6000-Targetmol-Natural Compound Library-1680cpds	0.43472
O=C(O)[C@@H](O)c1ccccc1	L6000-Targetmol-Natural Compound Library-1680cpds	0.363636
O=C(O)c1ccc2ccccc2n1	L6000-Targetmol-Natural Compound Library-1680cpds	0.376855
Nc1ccn([C@H]2C[C@H](O)[C@@H](CO)O2)c(=O)n1	L6000-Targetmol-Natural Compound Library-1680cpds	0.389578
CCC(C)C=O	L6000-Targetmol-Natural Compound Library-1680cpds	0.28125
C=C(CC(=O)O)C(=O)O	L6000-Targetmol-Natural Compound Library-1680cpds	0.340249
O=C(O)C[C@H](O)C(=O)O	L6000-Targetmol-Natural Compound Library-1680cpds	0.512
CC(=O)N[C@@H](C)C(=O)O	L6000-Targetmol-Natural Compound Library-1680cpds	0.380952
O=C(O)c1cccc(O)c1	L6000-Targetmol-Natural Compound Library-1680cpds	0.421725
C[N+](C)(C)CCCC[C@H](N)C(=O)O.[Cl-]	L6000-Targetmol-Natural Compound Library-1680cpds	0.419753
CCCCCCCCCCCCCCCC(=O)O[C@H]1CC[C@@]2(C)C(=CC[C@@H]3[C@@H]2CC[C@]2(C)C([C@H](C)CCCC(C)C)CC[C@@H]32)C1	L6000-Targetmol-Natural Compound Library-1680cpds	0.650558
O=P([O-])([O-])O[C@@H]1[C@@H](OP(=O)(O)O)[C@H](OP(=O)(O)O)[C@@H](OP(=O)(O)O)[C@H](OP(=O)(O)O)[C@@H]1OP(=O)(O)O.[K+].[K+]	L6000-Targetmol-Natural Compound Library-1680cpds	0.491935
Nc1nc2c(ncn2[C@@H]2O[C@@H]3COP(=O)([O-])O[C@H]3[C@H]2O)c(=O)[nH]1.[Na+]	L6000-Targetmol-Natural Compound Library-1680cpds	0.550192
CC(C)CC(=O)C(=O)O	L6000-Targetmol-Natural Compound Library-1680cpds	0.484375
CCC(=O)C(=O)O	L6000-Targetmol-Natural Compound Library-1680cpds	0.33871
NC(COP(=O)(O)O)C(=O)O	L6000-Targetmol-Natural Compound Library-1680cpds	0.482609
Nc1ccccc1C(=O)O	L6000-Targetmol-Natural Compound Library-1680cpds	0.368171
Cc1cc2nc3c(=O)[nH]c(=O)nc-3n(C[C@H](O)[C@H](O)[C@H](O)COP(=O)([O-])OP(=O)([O-])OC[C@H]3O[C@@H](n4cnc5c(N)ncnc54)[C@H](O)[C@@H]3O)c2cc1C.[Na+].[Na+]	L6000-Targetmol-Natural Compound Library-1680cpds	0.654731
O.O=C([O-])[C@H]1OC(O)[C@H](O)[C@@H](O)[C@@H]1O.[Na+]	L6000-Targetmol-Natural Compound Library-1680cpds	0.410334
Cc1ncc(COP(=O)(O)O)c(C=O)c1O	L6000-Targetmol-Natural Compound Library-1680cpds	0.497984
N[C@@H](CS(=O)(=O)O)C(=O)O.O	L6000-Targetmol-Natural Compound Library-1680cpds	0.492063
O.O.O=C(O)C(=O)O	L6000-Targetmol-Natural Compound Library-1680cpds	0.328125
O.O.O=c1[nH]c(=O)c2ncn([C@@H]3O[C@H](CO)[C@@H](O)[C@H]3O)c2[nH]1	L6000-Targetmol-Natural Compound Library-1680cpds	0.506562
O.OC[C@H]1O[C@H](O)[C@H](O)[C@@H](O)[C@@H]1O[C@@H]1O[C@H](CO)[C@H](O)[C@H](O)[C@H]1O	L6000-Targetmol-Natural Compound Library-1680cpds	0.331928
O=C(O)[C@H](O)[C@@H](O)C(=O)O	L6000-Targetmol-Natural Compound Library-1680cpds	0.366667
OCCNCCO	L6000-Targetmol-Natural Compound Library-1680cpds	0.328125
O=CC(O)CO	L6000-Targetmol-Natural Compound Library-1680cpds	0.34375
Oc1ccccc1O	L6000-Targetmol-Natural Compound Library-1680cpds	0.413223
OC[C@H](O)C(O)[C@@H](O)CO	L6000-Targetmol-Natural Compound Library-1680cpds	0.403226
O=C(O)CP(=O)(O)O	L6000-Targetmol-Natural Compound Library-1680cpds	0.488189
O=C(O)CCCC(=O)C(=O)O	L6000-Targetmol-Natural Compound Library-1680cpds	0.364807
O=C(O)CCc1ccccc1O	L6000-Targetmol-Natural Compound Library-1680cpds	0.410959
O=C(O)Cc1ccccc1	L6000-Targetmol-Natural Compound Library-1680cpds	0.399103
O=C(O)CC(=O)C(=O)O	L6000-Targetmol-Natural Compound Library-1680cpds	0.330544
C=CC(=O)O	L6000-Targetmol-Natural Compound Library-1680cpds	0.3125
O=C(O)/C=C(\CC(=O)O)C(=O)O	L6000-Targetmol-Natural Compound Library-1680cpds	0.315126
O=C(O)C(=O)Cc1ccc(O)cc1	L6000-Targetmol-Natural Compound Library-1680cpds	0.426036
O=C1CCNC(=O)N1	L6000-Targetmol-Natural Compound Library-1680cpds	0.391129
O=C1CCCC1	L6000-Targetmol-Natural Compound Library-1680cpds	0.390625
O=c1[nH]cnc2c1ncn2[C@@H]1O[C@H](COP(=O)(O)O)[C@@H](O)[C@H]1O	L6000-Targetmol-Natural Compound Library-1680cpds	0.504886
Cc1ncc(C[n+]2csc(CCOP(=O)(O)O)c2C)c(N)n1.O.O.[Cl-]	L6000-Targetmol-Natural Compound Library-1680cpds	0.359375
O.O=P(O)(O)OC(C[O-])C[O-].[Na+].[Na+]	L6000-Targetmol-Natural Compound Library-1680cpds	0.333333
O.O=P([O-])([O-])O[C@H]1O[C@H](CO)[C@@H](O)[C@H](O)[C@H]1O.[Na+].[Na+]	L6000-Targetmol-Natural Compound Library-1680cpds	0.452429
O.O=C([O-])[C@H](CO)OP(=O)([O-])O.[Na+].[Na+]	L6000-Targetmol-Natural Compound Library-1680cpds	0.497942
CN(CC(=O)[O-])C(=N)NP(=O)([O-])O.O.[Na+].[Na+]	L6000-Targetmol-Natural Compound Library-1680cpds	0.407658
NCCCNCCCN	L6000-Targetmol-Natural Compound Library-1680cpds	0.390625
NCCCN	L6000-Targetmol-Natural Compound Library-1680cpds	0.1875
NCCCCNCCCN	L6000-Targetmol-Natural Compound Library-1680cpds	0.53125
NCCCCN	L6000-Targetmol-Natural Compound Library-1680cpds	0.25
NCc1ccccc1	L6000-Targetmol-Natural Compound Library-1680cpds	0.429752
NCC(O)c1ccccc1	L6000-Targetmol-Natural Compound Library-1680cpds	0.490741
Nc1ccccc1	L6000-Targetmol-Natural Compound Library-1680cpds	0.4375
NC(N)=S	L6000-Targetmol-Natural Compound Library-1680cpds	0.15625
NC(N)=NCCCC(=O)O	L6000-Targetmol-Natural Compound Library-1680cpds	0.516129
NC(CO)(CO)CO.O=c1ccn([C@@H]2O[C@H](COP(=O)(O)OP(=O)(O)OP(=O)(O)O)[C@@H](O)[C@H]2O)c(=O)[nH]1	L6000-Targetmol-Natural Compound Library-1680cpds	0.47648
NC(CCSSCC[C@H](N)C(=O)O)C(=O)O	L6000-Targetmol-Natural Compound Library-1680cpds	0.392857
NC(CCS)C(=O)O	L6000-Targetmol-Natural Compound Library-1680cpds	0.504
NC(=O)NCCC(=O)O	L6000-Targetmol-Natural Compound Library-1680cpds	0.314655
N[C@@H](CCC[C@H](N)C(=O)O)C(=O)O	L6000-Targetmol-Natural Compound Library-1680cpds	0.353659
CO[C@@H]1O[C@H](CO)[C@H](O)[C@H](O)[C@H]1O	L6000-Targetmol-Natural Compound Library-1680cpds	0.314642
Cn1c(=O)[nH]c2ncn(C)c2c1=O	L6000-Targetmol-Natural Compound Library-1680cpds	0.354029
Cn1cnc(C[C@H](N)C(=O)O)c1	L6000-Targetmol-Natural Compound Library-1680cpds	0.319328
Cl.NCC(O)CCC(N)C(=O)O	L6000-Targetmol-Natural Compound Library-1680cpds	0.419355
Cl.NCC(N)C(=O)O	L6000-Targetmol-Natural Compound Library-1680cpds	0.385827
Cl.NC(=O)[C@@H](N)Cc1c[nH]c2ccccc12	L6000-Targetmol-Natural Compound Library-1680cpds	0.460509
Cl.Cl.NCCCCCN	L6000-Targetmol-Natural Compound Library-1680cpds	0.28125
Cl.Cl.N[C@H](CO)Cc1cnc[nH]1	L6000-Targetmol-Natural Compound Library-1680cpds	0.338086
Cl.Cl.Cn1cncc1CCN	L6000-Targetmol-Natural Compound Library-1680cpds	0.345992
CCCCCCCCCCCCCCCCCCCCCCC(=O)O	L6000-Targetmol-Natural Compound Library-1680cpds	0.36
CCCCCCCCCCCC=CCCCCC(=O)O	L6000-Targetmol-Natural Compound Library-1680cpds	0.488
CCCCCCCC/C=C/CCCCCCCC(=O)O	L6000-Targetmol-Natural Compound Library-1680cpds	0.48
CCCCCCCC/C=C\CCCCCCCCCCCCCC(=O)O	L6000-Targetmol-Natural Compound Library-1680cpds	0.48
CCCCCCCC/C=C\CCCCCCCCCCCC(=O)O	L6000-Targetmol-Natural Compound Library-1680cpds	0.48
CCCCCC/C=C\CCCCCCCC(=O)O	L6000-Targetmol-Natural Compound Library-1680cpds	0.48
CCCCC/C=C\C/C=C\C/C=C\CCCCC(=O)O	L6000-Targetmol-Natural Compound Library-1680cpds	0.336245
CCCCC(=O)O	L6000-Targetmol-Natural Compound Library-1680cpds	0.484375
CCCC(=O)O	L6000-Targetmol-Natural Compound Library-1680cpds	0.40625
Cc1c(=O)c(=O)c2c3c[nH]c4c(C)c(=O)c(=O)c(c5c[nH]c1c52)c43	L6000-Targetmol-Natural Compound Library-1680cpds	0.482643
Cc1ncc(C[n+]2csc(CCO[P@@](=O)(O)OP(=O)(O)O)c2C)c(N)n1	L6000-Targetmol-Natural Compound Library-1680cpds	0.380282
CC(O)CC(=O)O	L6000-Targetmol-Natural Compound Library-1680cpds	0.515625
CC(CN)C(=O)O	L6000-Targetmol-Natural Compound Library-1680cpds	0.370079
CC(C)C(=O)O	L6000-Targetmol-Natural Compound Library-1680cpds	0.421875
CC(=O)NCCCC(=O)O	L6000-Targetmol-Natural Compound Library-1680cpds	0.321429
CC(=O)NC(CCCCN)C(=O)O	L6000-Targetmol-Natural Compound Library-1680cpds	0.376569
CC(=O)N[C@@H](CC(N)=O)C(=O)O	L6000-Targetmol-Natural Compound Library-1680cpds	0.418367
c1ccc2ncccc2c1	L6000-Targetmol-Natural Compound Library-1680cpds	0.466135
C[C@H]1O[C@@H](n2cnc3c(N)ncnc32)[C@H](O)[C@@H]1O	L6000-Targetmol-Natural Compound Library-1680cpds	0.507861
CCC(O)C(=O)[O-].[Na+]	L6000-Targetmol-Natural Compound Library-1680cpds	0.33871
O=P([O-])(O)OP(=O)([O-])OP(=O)([O-])OC[C@H]1O[C@@H](n2cnc3c(O)ncnc32)[C@H](O)[C@@H]1O.[Na+].[Na+].[Na+]	L6000-Targetmol-Natural Compound Library-1680cpds	0.53085
Nc1ccn([C@H]2C[C@H](O)[C@@H](COP(=O)([O-])OP(=O)([O-])[O-])O2)c(=O)n1.[Na+].[Na+].[Na+]	L6000-Targetmol-Natural Compound Library-1680cpds	0.412442
C=C(OP(=O)([O-])O)C(=O)O.[K+]	L6000-Targetmol-Natural Compound Library-1680cpds	0.470339
O=C([O-])[C@@H](O)[C@@H](O)[C@H](O)[C@@H](O)C(=O)O.[K+]	L6000-Targetmol-Natural Compound Library-1680cpds	0.317829
O=S(=O)([O-])Oc1c[nH]c2ccccc12.[K+]	L6000-Targetmol-Natural Compound Library-1680cpds	0.398953
CCCCCCCCCCCCCC(=O)OCC(COC(=O)CCCCCCCCCCCCC)OC(=O)CCCCCCCCCCCCC	L6000-Targetmol-Natural Compound Library-1680cpds	0.389873
O=C1O[C@H]([C@H](O)CO)C(=O)C1=O	L6000-Targetmol-Natural Compound Library-1680cpds	0.401813
OC[C@@H]1OC(O)[C@@H](O)[C@@H](O)[C@H]1O	L6000-Targetmol-Natural Compound Library-1680cpds	0.481043
CC(C)=CCC[C@@H](C)[C@H]1CC[C@@]2(C)C3=C(CC[C@]12C)[C@@]1(C)CC[C@H](O)C(C)(C)[C@@H]1CC3	L6000-Targetmol-Natural Compound Library-1680cpds	0.59596
CC(C)CCC[C@@H](C)[C@H]1CC[C@H]2C3=CC=C4C[C@@H](O)CC[C@]4(C)[C@H]3CC[C@@]21C	L6000-Targetmol-Natural Compound Library-1680cpds	0.511111
C[n+]1cccc(C(N)=O)c1.[Cl-]	L6000-Targetmol-Natural Compound Library-1680cpds	0.436441
COC(=O)[C@@H](Cc1ccc(O)c(O)c1)OC(=O)[C@@H]1c2c(/C=C/C(=O)O[C@H](Cc3ccc(O)c(O)c3)C(=O)O)ccc(O)c2O[C@H]1c1ccc(O)c(O)c1	L6000-Targetmol-Natural Compound Library-1680cpds	0.583378
O=C(/C=C/c1ccc(O)c(O)c1)O[C@H]1[C@H](O)C[C@](OC(=O)/C=C/c2ccc(O)c(O)c2)(C(=O)O)C[C@H]1O	L6000-Targetmol-Natural Compound Library-1680cpds	0.491787
COc1ccc(CCC(=O)c2ccc(O)cc2)c(OC)c1	L6000-Targetmol-Natural Compound Library-1680cpds	0.489614
OC[C@H]1O[C@H](O[C@]2(CO[C@]3(CO[C@]4(CO)O[C@H](CO)[C@@H](O)[C@@H]4O)O[C@H](CO)[C@@H](O)[C@@H]3O)O[C@H](CO)[C@@H](O)[C@@H]2O)[C@H](O)[C@@H](O)[C@@H]1O	L6000-Targetmol-Natural Compound Library-1680cpds	0.437755
CC1(C)CCC[C@]2(C)[C@@H]1CC[C@@]13C[C@@H](CC[C@H]12)[C@@](O)(CO)C3	L6000-Targetmol-Natural Compound Library-1680cpds	0.430851
O=c1c(O[C@@H]2O[C@H](CO)[C@@H](O)[C@H](O)[C@H]2O)c(-c2ccc(O)c(O)c2)oc2cc(O)cc(O)c12	L6000-Targetmol-Natural Compound Library-1680cpds	0.538958
CC(=O)OC(C)(C)[C@@H]1Cc2c(ccc3ccc(=O)oc23)O1	L6000-Targetmol-Natural Compound Library-1680cpds	0.461452
O=C(/C=C/c1ccc(O)c(O)c1)O[C@@H]1C[C@](O)(C(=O)O)C[C@@H](OC(=O)/C=C/c2ccc(O)c(O)c2)[C@H]1O	L6000-Targetmol-Natural Compound Library-1680cpds	0.497517
C=C1C[C@@]23CC[C@H]4[C@@](C)(CCC[C@@]4(C)C(=O)O)[C@@H]2CC[C@]1(O[C@@H]1O[C@H](CO)[C@@H](O)[C@H](O)[C@H]1O[C@@H]1O[C@H](CO)[C@@H](O)[C@H](O)[C@H]1O)C3	L6000-Targetmol-Natural Compound Library-1680cpds	0.537723
O=C(CCc1ccc(O)cc1)c1c(O)cc(O[C@@H]2O[C@H](CO)[C@@H](O)[C@H](O)[C@H]2O)cc1O	L6000-Targetmol-Natural Compound Library-1680cpds	0.450799
CC(=O)O[C@H]1CC[C@@]2(C)[C@@H](CC[C@@H]3[C@@H]2CC[C@@]2(C)[C@H]3C[C@@H]3O[C@]4(CC[C@@H](C)CO4)[C@@H](C)[C@@H]32)C1	L6000-Targetmol-Natural Compound Library-1680cpds	0.462848
CC(C)=CC[C@H](O)C1=CC(=O)c2c(O)ccc(O)c2C1=O	L6000-Targetmol-Natural Compound Library-1680cpds	0.420591
Oc1ccc(CC2NCCc3cc(O)c(O)cc32)cc1	L6000-Targetmol-Natural Compound Library-1680cpds	0.483645
O[C@H]1CCN2Cc3ccccc3N=C12	L6000-Targetmol-Natural Compound Library-1680cpds	0.38539
O=C1C[C@@H](c2cc(O)c(O)c(O[C@@H]3O[C@H](CO)[C@@H](O)[C@H](O)[C@H]3O)c2)Oc2cc(O)cc(O)c21	L6000-Targetmol-Natural Compound Library-1680cpds	0.626582
CC1(C)CC[C@]2(C(=O)O)CC[C@]3(C)C(=CC[C@@H]4[C@@]5(C)CC[C@H](O[C@@H]6O[C@H](C(=O)O)[C@@H](O)[C@H](O)[C@H]6O[C@@H]6O[C@H](CO)[C@@H](O)[C@H](O)[C@H]6O)C(C)(C)[C@@H]5CC[C@]43C)[C@@H]2C1	L6000-Targetmol-Natural Compound Library-1680cpds	0.667622
OC[C@H]1O[C@H](Oc2ccc(O)cc2)[C@H](O)[C@@H](O)[C@@H]1O	L6000-Targetmol-Natural Compound Library-1680cpds	0.469574
CC(CC(=O)C[C@@H](C)C1CC(=O)[C@@]2(C)C3=C(C(=O)[C@@H](O)[C@]12C)[C@@]1(C)CC[C@H](O)C(C)(C)[C@@H]1C[C@@H]3O)C(=O)O	L6000-Targetmol-Natural Compound Library-1680cpds	0.602493
C=C[C@@](C)(/C=C/c1ccc(O)cc1)CCC=C(C)C	L6000-Targetmol-Natural Compound Library-1680cpds	0.471963
COC(=O)[C@@]1(C)CC[C@]2(C(=O)O)CC[C@]3(C)C(=CC[C@@H]4[C@@]5(C)C[C@H](O)[C@H](O)[C@@](C)(CO)[C@@H]5CC[C@]43C)[C@@H]2C1	L6000-Targetmol-Natural Compound Library-1680cpds	0.820116
OC[C@H](O)[C@H](O)[C@H](O)CO	L6000-Targetmol-Natural Compound Library-1680cpds	0.403226
C[C@@H]1C[C@H]2[C@@H]3CCC4=CC(=O)C=C[C@]4(C)[C@@]3(F)[C@@H](O)C[C@]2(C)[C@@]1(O)C(=O)CO	L4000-Targetmol-Bioactive Compound Library-5080cpds	0.549795
CC(=O)OCC(=O)[C@@]1(O)CC[C@H]2[C@@H]3CCC4=CC(=O)CC[C@]4(C)C3[C@@H](O)C[C@@]21C	L4000-Targetmol-Bioactive Compound Library-5080cpds	0.6448
CO[C@@]12[C@H](COC(N)=O)C3=C(C(=O)C(C)=C(N)C3=O)N1C[C@@H]1N[C@@H]12	L4000-Targetmol-Bioactive Compound Library-5080cpds	0.640536
CCCCOCCOCCOCc1cc2c(cc1CCC)OCO2	L4000-Targetmol-Bioactive Compound Library-5080cpds	0.488064
CCN(CC)CCOC(=O)c1ccc(N)cc1.Cl	L4000-Targetmol-Bioactive Compound Library-5080cpds	0.468182
O=C(CCNNC(=O)c1ccncc1)NCc1ccccc1	L4000-Targetmol-Bioactive Compound Library-5080cpds	0.362667
CC(=O)S[C@@H]1CC2=CC(=O)CC[C@]2(C)[C@H]2CC[C@@]3(C)[C@@H](CC[C@@]34CCC(=O)O4)C21	L4000-Targetmol-Bioactive Compound Library-5080cpds	0.62119
CC(S)C(=O)NCC(=O)O	L4000-Targetmol-Bioactive Compound Library-5080cpds	0.424603
C[C@]12CC(=O)[C@H]3[C@@H](CCC4=CC(=O)C=C[C@@]43C)[C@@H]1CC[C@]2(O)C(=O)CO	L4000-Targetmol-Bioactive Compound Library-5080cpds	0.564341
N[C@@H](Cc1cc(I)c(Oc2ccc(O)c(I)c2)c(I)c1)C(=O)[O-].[Na+]	L4000-Targetmol-Bioactive Compound Library-5080cpds	0.451572
Cc1cc(=O)[nH]c(=S)[nH]1	L4000-Targetmol-Bioactive Compound Library-5080cpds	0.3878
CC(=O)NCCCCCC(=O)O	L4000-Targetmol-Bioactive Compound Library-5080cpds	0.365079
CN(Cc1cnc2nc(N)nc(N)c2n1)c1ccc(C(=O)N[C@@H](CCC(=O)O)C(=O)O)cc1	L4000-Targetmol-Bioactive Compound Library-5080cpds	0.478528
CCOc1cc(NC(C)=O)ccc1C(=O)OC	L4000-Targetmol-Bioactive Compound Library-5080cpds	0.487936
CCN(CC)CCCC(C)Nc1c2ccc(Cl)cc2nc2ccc(OC)cc12.Cl.Cl	L4000-Targetmol-Bioactive Compound Library-5080cpds	0.419708
O=C1OC(c2ccc(O)cc2)(c2ccc(O)cc2)c2ccccc21	L4000-Targetmol-Bioactive Compound Library-5080cpds	0.51269
Cc1c(N)c(=O)n(-c2ccccc2)n1C	L4000-Targetmol-Bioactive Compound Library-5080cpds	0.360867
O=C1c2ccccc2C(=O)C1c1ccccc1	L4000-Targetmol-Bioactive Compound Library-5080cpds	0.421911
CN1CCN(CCCN2c3ccccc3Sc3ccc(Cl)cc32)CC1.O=C(O)/C=C\C(=O)O.O=C(O)/C=C\C(=O)O	L4000-Targetmol-Bioactive Compound Library-5080cpds	0.36428
CCOC(=O)c1ccc(N)cc1	L4000-Targetmol-Bioactive Compound Library-5080cpds	0.405594
C[C@]12CC[C@H]3[C@@H](C=CC4=CC(=O)CC[C@@]43C)[C@@H]1CC[C@@]2(O)CCC(=O)[O-].[K+]	L4000-Targetmol-Bioactive Compound Library-5080cpds	0.560606
Cc1cc(C(C)(C)C)c(O)c(C)c1CC1=NCCN1.Cl	L4000-Targetmol-Bioactive Compound Library-5080cpds	0.467708
O=C1OC2(c3ccc(O)cc3Oc3cc(O)ccc32)c2ccccc21	L4000-Targetmol-Bioactive Compound Library-5080cpds	0.410317
C[C@H]1C[C@@H]2C([C@@H](O)C[C@@]3(C)[C@H]2CC[C@]3(O)C(=O)COC(=O)CCC(=O)[O-])[C@@]2(C)C=CC(=O)C=C12.[Na+]	L4000-Targetmol-Bioactive Compound Library-5080cpds	0.616893
CC(C)(O)[C@H]1CC[C@@](C)(O)CC1.O	L4000-Targetmol-Bioactive Compound Library-5080cpds	0.432203
COc1cc(-c2ccc(/N=N/c3ccc4c(S(=O)(=O)[O-])cc(S(=O)(=O)[O-])c(N)c4c3O)c(OC)c2)ccc1/N=N/c1ccc2c(S(=O)(=O)[O-])cc(S(=O)(=O)[O-])c(N)c2c1O.[Na+].[Na+].[Na+].[Na+]	L4000-Targetmol-Bioactive Compound Library-5080cpds	0.424473
CC(=O)Nc1cccc(Cc2cccc(NC(C)=O)c2)c1	L4000-Targetmol-Bioactive Compound Library-5080cpds	0.5
C[C@H]1O[C@@H](n2cc(F)c(=O)[nH]c2=O)[C@H](O)[C@@H]1O	L4000-Targetmol-Bioactive Compound Library-5080cpds	0.433143
CC(O)c1ccc(S(=O)(=O)NC(=O)NC2CCCCC2)cc1	L4000-Targetmol-Bioactive Compound Library-5080cpds	0.428416
CCN(CC)CCOC(=O)[C@H](Cc1cccc2ccccc12)C[C@H]1CCCO1.O=C(O)C(=O)O	L4000-Targetmol-Bioactive Compound Library-5080cpds	0.48913
CCn1cc(C(=O)[O-])c(=O)c2ccc(C)nc21.[Na+]	L4000-Targetmol-Bioactive Compound Library-5080cpds	0.427507
c1cnc(N2CCN(Cc3ccc4c(c3)OCO4)CC2)nc1	L4000-Targetmol-Bioactive Compound Library-5080cpds	0.485372
O=c1ncccn1[C@@H]1O[C@H](CO)[C@H](O)C1O	L4000-Targetmol-Bioactive Compound Library-5080cpds	0.39951
CC(C)N(CCC(C(N)=O)(c1ccccc1)c1ccccn1)C(C)C	L4000-Targetmol-Bioactive Compound Library-5080cpds	0.417336
CN(C)N=Nc1[nH]cnc1C(N)=O	L4000-Targetmol-Bioactive Compound Library-5080cpds	0.372881
Cl.O=C1NCC2(CCN(CCc3ccccc3)CC2)O1	L4000-Targetmol-Bioactive Compound Library-5080cpds	0.412698
O=c1[nH]ccc2c(O)cccc12	L4000-Targetmol-Bioactive Compound Library-5080cpds	0.486815
CN1CCC(=C2c3ccccc3CCc3sccc32)CC1.O=C(O)CC(O)C(=O)O	L4000-Targetmol-Bioactive Compound Library-5080cpds	0.419092
Cc1cccc(C)c1OCC(C)[NH3+].[Cl-]	L4000-Targetmol-Bioactive Compound Library-5080cpds	0.422989
CCC(=O)OCC(=O)[C@@]1(OC(=O)CC)[C@@H](C)C[C@H]2[C@@H]3CCC4=CC(=O)C=C[C@]4(C)[C@@]3(Cl)[C@@H](O)C[C@@]21C	L4000-Targetmol-Bioactive Compound Library-5080cpds	0.586428
O=C1CCc2c(ccc3ccccc23)O1	L4000-Targetmol-Bioactive Compound Library-5080cpds	0.484225
CN(C)c1ccc(/C=C2\C(=O)Nc3ccccc32)cc1	L4000-Targetmol-Bioactive Compound Library-5080cpds	0.423948
CCCOc1ccc(C(=O)OCCN(CC)CC)cc1N.Cl	L4000-Targetmol-Bioactive Compound Library-5080cpds	0.43681
C#CCCC(=O)O	L4000-Targetmol-Bioactive Compound Library-5080cpds	0.53125
O=C(O[C@H]1[C@H](OC(=O)c2cccnc2)[C@@H](OC(=O)c2cccnc2)[C@H](OC(=O)c2cccnc2)[C@@H](OC(=O)c2cccnc2)[C@H]1OC(=O)c1cccnc1)c1cccnc1	L4000-Targetmol-Bioactive Compound Library-5080cpds	0.462351
COC(=O)N/N=C/c1c[n+]([O-])c2ccccc2[n+]1[O-]	L4000-Targetmol-Bioactive Compound Library-5080cpds	0.342037
CCCC(C)NC(=O)c1ccc(Cl)c(Cl)c1	L4000-Targetmol-Bioactive Compound Library-5080cpds	0.358389
O=C(O)CNC(=O)c1ncc(-c2cccc(Cl)c2)cc1O	L4000-Targetmol-Bioactive Compound Library-5080cpds	0.384807
Cc1cc(OCCCS(C)(=O)=O)cc(C)c1-c1cccc(COc2ccc3c(c2)OC[C@H]3CC(=O)O)c1	L4000-Targetmol-Bioactive Compound Library-5080cpds	0.437807
O=C(c1ccc(/C=C/c2n[nH]c3ccccc23)cc1)N1CCNCC1	L4000-Targetmol-Bioactive Compound Library-5080cpds	0.354749
N[C@@H](CCCCNC(=O)C(F)(F)F)C(=O)O	L4000-Targetmol-Bioactive Compound Library-5080cpds	0.356557
CC(C)NC[C@@H](C(=O)N1CCN(c2ncnc3c2[C@H](C)C[C@H]3O)CC1)c1ccc(Cl)cc1	L4000-Targetmol-Bioactive Compound Library-5080cpds	0.561374
C[C@@]1(C(=O)Nc2ccc(F)nc2)CCCN1c1nc(Nc2cc(C3CC3)[nH]n2)c2cccn2n1	L4000-Targetmol-Bioactive Compound Library-5080cpds	0.610814
Cl.O=C(Nc1ccccc1-c1cn2c(CN3CCNCC3)csc2n1)c1cnc2ccccc2n1	L4000-Targetmol-Bioactive Compound Library-5080cpds	0.561172
C[N+](C)(C)C[C@@H](O)CC(=O)O.[Cl-]	L4000-Targetmol-Bioactive Compound Library-5080cpds	0.388889
Cc1cc(C)c(-c2csc(NC(=O)c3ccccc3)n2)c(C)c1	L4000-Targetmol-Bioactive Compound Library-5080cpds	0.564024
COc1ccc2c(OCc3nnc4ccc(-c5ccccc5)nn34)ccnc2c1	L4000-Targetmol-Bioactive Compound Library-5080cpds	0.452005
Cc1cccn2c(=O)c(-c3nnn[n-]3)cnc12.[K+]	L4000-Targetmol-Bioactive Compound Library-5080cpds	0.360759
O=S(=O)([O-])Oc1ccc(C(c2ccc(OS(=O)(=O)[O-])cc2)c2ccccn2)cc1.[Na+].[Na+]	L4000-Targetmol-Bioactive Compound Library-5080cpds	0.381609
COC(=O)C1=C(C)NC(C)=C(C(=O)OC(C)(C)CN(C)CCC(c2ccccc2)c2ccccc2)C1c1cccc([N+](=O)[O-])c1	L4000-Targetmol-Bioactive Compound Library-5080cpds	0.500817
CC(C)c1nc(CN(C)C(=O)N[C@@H](CCN2CCOCC2)C(=O)N[C@H](CC[C@H](Cc2ccccc2)NC(=O)OCc2cncs2)Cc2ccccc2)cs1	L4000-Targetmol-Bioactive Compound Library-5080cpds	0.474576
CCn1c(=O)[nH]c2ccccc21	L4000-Targetmol-Bioactive Compound Library-5080cpds	0.390572
Cc1ccc(NS(=O)(=O)c2ccc3c(c2)C2C=CCC2C(c2ccc(C(=O)O)cc2)N3)cc1C	L4000-Targetmol-Bioactive Compound Library-5080cpds	0.515493
CN[C@@H](C)C(=O)N[C@H](C(=O)N1CCC[C@H]1c1nc(C(=O)c2ccc(F)cc2)cs1)C1CCCCC1	L4000-Targetmol-Bioactive Compound Library-5080cpds	0.536319
C#Cc1cnc2[nH]c(=O)n(C(CC)CC)c2n1	L4000-Targetmol-Bioactive Compound Library-5080cpds	0.375087
OCc1cccnc1	L4000-Targetmol-Bioactive Compound Library-5080cpds	0.388
Nc1nc(N)c2c(OCC3CCN(Cc4c(Cl)cccc4Cl)CC3)cccc2n1	L4000-Targetmol-Bioactive Compound Library-5080cpds	0.540476
Clc1ccc2c(c1)CCc1cccnc1C2=C1CCNCC1	L4000-Targetmol-Bioactive Compound Library-5080cpds	0.428571
CS(=O)(=O)N1CCc2c(-c3cnc(N)nc3)nc(N3CCOCC3)nc21	L4000-Targetmol-Bioactive Compound Library-5080cpds	0.561988
COc1ccc(/C=C/C=C2C(=O)NC(=O)NC2=O)cc1	L4000-Targetmol-Bioactive Compound Library-5080cpds	0.406114
COC(=O)N[C@H](C(=O)N1CCC[C@H]1c1ncc(-c2ccc(-c3ccc(-c4cnc([C@@H]5CCCN5C(=O)[C@@H](NC(=O)OC)C(C)C)[nH]4)cc3)cc2)[nH]1)C(C)C.Cl.Cl	L4000-Targetmol-Bioactive Compound Library-5080cpds	0.444952
COc1ccc(-c2ccc3c(N4CCOC[C@@H]4C)nc(N4CCOC[C@@H]4C)nc3n2)cc1CO	L4000-Targetmol-Bioactive Compound Library-5080cpds	0.548002
CNC(=O)c1cccc(-c2ccc3c(N4CCOC[C@@H]4C)nc(N4CCOC[C@@H]4C)nc3n2)c1	L4000-Targetmol-Bioactive Compound Library-5080cpds	0.54497
C1N2CN3CN1CN(C2)C3	L4000-Targetmol-Bioactive Compound Library-5080cpds	0.5
CC(C)(C)Oc1cccc2nc(N)nc(N)c12	L4000-Targetmol-Bioactive Compound Library-5080cpds	0.514933
C=CC(=O)N1C/C(=C\c2ccc([N+](=O)[O-])cc2)C(=O)/C(=C/c2ccc([N+](=O)[O-])cc2)C1	L4000-Targetmol-Bioactive Compound Library-5080cpds	0.500518
O=C(O)c1ccc2c(c1)nc(Nc1cccc(Cl)c1)c1ccncc12	L4000-Targetmol-Bioactive Compound Library-5080cpds	0.432584
O=C(O)[C@]1(Cc2cccc(Nc3nccs3)n2)CC[C@@H](Oc2cccc(Cl)c2F)CC1	L4000-Targetmol-Bioactive Compound Library-5080cpds	0.469714
O=C1C=C(Cl)C(=O)c2ccccc21	L4000-Targetmol-Bioactive Compound Library-5080cpds	0.416667
Nc1ccc(NC(=O)c2ccc(C(F)(F)F)cc2)nc1	L4000-Targetmol-Bioactive Compound Library-5080cpds	0.446575
CC(C)(C)c1ccc(C(=O)NC(=S)Nc2ccc(N)cc2)cc1	L4000-Targetmol-Bioactive Compound Library-5080cpds	0.406213
CCN(CC)C(=O)[C@]1(c2ccccc2)C[C@@H]1CN.Cl	L4000-Targetmol-Bioactive Compound Library-5080cpds	0.362056
CN(C)CCCCC(=O)Nc1ccc(NC(=S)NC(=O)c2ccc(C(C)(C)C)cc2)cc1	L4000-Targetmol-Bioactive Compound Library-5080cpds	0.487089
O=C(Nc1ccc(Cl)cc1)Nc1ccc(Cl)c(Cl)c1	L4000-Targetmol-Bioactive Compound Library-5080cpds	0.440928
C#Cc1cccc(Nc2ncnc3cc(OC)c(OCCCCCCC(=O)NO)cc23)c1	L4000-Targetmol-Bioactive Compound Library-5080cpds	0.9
CN(C)C(=O)Oc1ccc[n+](C)c1.[Br-]	L4000-Targetmol-Bioactive Compound Library-5080cpds	0.50497
COc1ccc(-c2cc3c(C)nc(N)nc3n([C@H]3CC[C@H](OCCO)CC3)c2=O)cn1	L4000-Targetmol-Bioactive Compound Library-5080cpds	0.740025
COC(=O)c1sccc1S(=O)(=O)Nc1ccc(Nc2ccccc2)cc1OC	L4000-Targetmol-Bioactive Compound Library-5080cpds	0.443801
COc1ccc(CN2CCN(C(c3ccc(F)cc3)c3ccc(F)cc3)CC2)c(OC)c1OC.Cl.Cl	L4000-Targetmol-Bioactive Compound Library-5080cpds	0.414706
CCN(CC)CCNC(=O)c1ccc(NS(C)(=O)=O)cc1.Cl	L4000-Targetmol-Bioactive Compound Library-5080cpds	0.369973
Cc1nc2cccc(N)c2c(=O)n1C1CCC(=O)NC1=O	L4000-Targetmol-Bioactive Compound Library-5080cpds	0.560976
CC(=O)O[C@H]1CC[C@H]2[C@@H]3CCC4=CC(=O)CCC4=C3C=C[C@]12C	L4000-Targetmol-Bioactive Compound Library-5080cpds	0.609281
O=P([O-])([O-])F.[Na+].[Na+]	L4000-Targetmol-Bioactive Compound Library-5080cpds	0.296875
CN(Cc1ccc(C(C)(C)C)cc1)Cc1cccc2ccccc12.Cl	L4000-Targetmol-Bioactive Compound Library-5080cpds	0.490153
N#CC(c1ccc(Cl)cc1)c1c(Cl)cc(-n2ncc(=O)[nH]c2=O)cc1Cl	L4000-Targetmol-Bioactive Compound Library-5080cpds	0.399061
CCOc1ccc(Cc2cc([C@@H]3O[C@H](SC)[C@@H](O)[C@H](O)[C@H]3O)ccc2Cl)cc1	L4000-Targetmol-Bioactive Compound Library-5080cpds	0.46934
Cc1ccc(CN(Cc2ccc(-c3ccccc3S(=O)(=O)NC#N)cc2)C(=O)c2ccccc2Cl)cc1	L4000-Targetmol-Bioactive Compound Library-5080cpds	0.385468
CC(=O)SCC(CC(=O)c1ccc(C)cc1)C(=O)O	L4000-Targetmol-Bioactive Compound Library-5080cpds	0.376426
Cc1cc(Nc2ccc(NC(=O)c3ccc(Nc4ccnc5ccccc45)cc3)cc2)nc(N)n1	L4000-Targetmol-Bioactive Compound Library-5080cpds	0.538398
CNC(=O)c1cc(Oc2ccc(NC(=O)Nc3cc(C(C)(C)C)nn3-c3ccc4ncccc4c3)c(F)c2)ccn1	L4000-Targetmol-Bioactive Compound Library-5080cpds	0.556769
O=C(Nc1cccnn1)N1CCC(=Cc2cccc(Oc3ccc(C(F)(F)F)cn3)c2)CC1	L4000-Targetmol-Bioactive Compound Library-5080cpds	0.406957
O=C(Nc1ccccc1)Nc1ccccc1	L4000-Targetmol-Bioactive Compound Library-5080cpds	0.481818
OCCCc1ccc(O)cc1	L4000-Targetmol-Bioactive Compound Library-5080cpds	0.49537
Cn1cc(-c2ccc3nnc(Sc4ccc5ncccc5c4)n3n2)cn1	L4000-Targetmol-Bioactive Compound Library-5080cpds	0.467391
OC(Cc1ncc(CC2(C(F)(F)F)CC2)[nH]1)(c1ccc(-n2cccn2)cc1)C(F)(F)F	L4000-Targetmol-Bioactive Compound Library-5080cpds	0.442907
COc1c(Nc2ncc(Cl)c(NC3C4C=CC(C4)C3C(N)=O)n2)ccc2c1CCC(N1CCOCC1)CC2	L4000-Targetmol-Bioactive Compound Library-5080cpds	0.584573
COc1ccc(Cl)cc1C(=O)NCCc1ccc(S(=O)(=O)NC(=O)NC2CCCCC2)cc1	L4000-Targetmol-Bioactive Compound Library-5080cpds	0.396574
ClC1=C(Cl)[C@]2(Cl)C3C([C@@H]4O[C@@H]4[C@@H]3Cl)[C@@]1(Cl)C2(Cl)Cl	L4000-Targetmol-Bioactive Compound Library-5080cpds	0.491082
O=C(O)c1cc2ccccc2c(Cc2c(O)c(C(=O)O)cc3ccccc23)c1O.OCCOCCN1CCN(C(c2ccccc2)c2ccc(Cl)cc2)CC1	L4000-Targetmol-Bioactive Compound Library-5080cpds	0.419005
C(#Cc1nc2ncccc2nc1OCCN1CCCC1)c1ccccc1	L4000-Targetmol-Bioactive Compound Library-5080cpds	0.39931
CN1CCC(CNc2ccc3ncc(-c4cccc(OC(F)(F)F)c4)n3n2)CC1	L4000-Targetmol-Bioactive Compound Library-5080cpds	0.484936
O=C(O)c1cn(C2CC2)c2cc(N3CCC(O)(COc4ccc(N5C[C@H](CO)OC5=O)cc4F)CC3)c(F)cc2c1=O	L4000-Targetmol-Bioactive Compound Library-5080cpds	0.613283
COc1cc(Nc2ncc(F)c(Nc3ccc4c(n3)N(COP(=O)([O-])[O-])C(=O)C(C)(C)O4)n2)cc(OC)c1OC.[Na+].[Na+]	L4000-Targetmol-Bioactive Compound Library-5080cpds	0.621155
CCOc1ccn(-c2ccc(F)cc2)c(=O)c1C(=O)Nc1ccc(Oc2ccnc(N)c2Cl)c(F)c1	L4000-Targetmol-Bioactive Compound Library-5080cpds	0.54101
CS(=O)(=O)c1cccc(C[C@H](NC(=O)c2c(Cl)cc3c(c2Cl)CCN(C(=O)c2ccc4ccoc4c2)C3)C(=O)O)c1	L4000-Targetmol-Bioactive Compound Library-5080cpds	0.511085
CC(C)(C)C#Cc1cc(N(C(=O)[C@H]2CC[C@H](C)CC2)[C@H]2CC[C@@H](O)CC2)c(C(=O)O)s1	L4000-Targetmol-Bioactive Compound Library-5080cpds	0.486858
CC(=O)OCC(COC(C)=O)OC(C)=O	L4000-Targetmol-Bioactive Compound Library-5080cpds	0.399209
CC[C@@H](C(N)=O)N1CCCC1=O	L4000-Targetmol-Bioactive Compound Library-5080cpds	0.470348
CN1CCN(c2cc(-c3ccccc3)nc(N)n2)CC1	L4000-Targetmol-Bioactive Compound Library-5080cpds	0.383966
COc1cc(Nc2ncc3c(n2)-c2ccc(Cl)cc2C(c2c(F)cccc2OC)=NC3)ccc1C(=O)O	L4000-Targetmol-Bioactive Compound Library-5080cpds	0.609208
FC(F)(F)c1ccc(CNc2ccc(Cc3c[nH]c4ncc(Cl)cc34)cn2)cn1	L4000-Targetmol-Bioactive Compound Library-5080cpds	0.424731
CN[C@@H]1C(=O)N[C@@H]2Cc3ccc(cc3)Oc3cc4cc(c3O[C@@H]3O[C@H](C(=O)O)[C@@H](O)[C@H](O)[C@H]3NC(=O)CCCCCCCCC(C)C)Oc3ccc(cc3Cl)[C@@H](O)[C@@H]3NC(=O)[C@H](NC(=O)[C@@H]4NC(=O)[C@@H](NC2=O)c2cc(cc(O)c2Cl)Oc2cc1ccc2O)c1ccc(O)c(c1)-c1c(O[C@H]2O[C@H](CO)[C@@H](O)[C@H](O)[C@@H]2O)cc(O)cc1[C@@H](C(=O)O)NC3=O	L4000-Targetmol-Bioactive Compound Library-5080cpds	0.711257
CNC(=O)c1ccc(-c2cnc3ncc(Cc4ccc5ncccc5c4)n3n2)cc1F	L4000-Targetmol-Bioactive Compound Library-5080cpds	0.499412
Cn1c(=O)cc(N2CCC[C@@H](N)C2)n(Cc2cc(F)ccc2C#N)c1=O.O=C(O)CCC(=O)O	L4000-Targetmol-Bioactive Compound Library-5080cpds	0.509642
CCCCCCCCCC(=O)N[C@@H](Cc1c[nH]c2ccccc12)C(=O)N[C@@H](CC(N)=O)C(=O)N[C@@H](CC(=O)O)C(=O)NC1C(=O)NCC(=O)N[C@@H](CCCN)C(=O)N[C@@H](CC(=O)O)C(=O)N[C@H](C)C(=O)N[C@@H](CC(=O)O)C(=O)NCC(=O)N[C@H](CO)C(=O)NC([C@H](C)CC(=O)O)C(=O)N[C@@H](CC(=O)c2ccccc2N)C(=O)OC1C	L4000-Targetmol-Bioactive Compound Library-5080cpds	0.573514
O=C(O)Cn1nnc(-c2cc(N3CCC(Oc4cc(F)ccc4Br)CC3)no2)n1	L4000-Targetmol-Bioactive Compound Library-5080cpds	0.451631
O=C(Nc1cccc2c(=O)cc(-c3nn[nH]n3)oc12)c1ccc(OCCCCc2ccccc2)cc1	L4000-Targetmol-Bioactive Compound Library-5080cpds	0.473621
Cl.Cl.NC1(c2ccc(-c3nc4ccn5c(=O)[nH]nc5c4cc3-c3ccccc3)cc2)CCC1	L4000-Targetmol-Bioactive Compound Library-5080cpds	0.516927
COc1c(OCCCN2CCOCC2)ccc2c1N=C(NC(=O)c1cnc(N)nc1)N1CCN=C21	L4000-Targetmol-Bioactive Compound Library-5080cpds	0.583831
Cc1c(CN2CCN(S(C)(=O)=O)CC2)sc2c(N3CCOCC3)nc(-c3cnc(N)nc3)nc12	L4000-Targetmol-Bioactive Compound Library-5080cpds	0.568182
Cc1c(CN2CCN(C(=O)[C@H](C)O)CC2)sc2c(N3CCOCC3)nc(-c3cnc(N)nc3)nc12	L4000-Targetmol-Bioactive Compound Library-5080cpds	0.574595
CC(C)c1noc(N2CCC(COc3ccc(-c4ccc(S(C)(=O)=O)cc4)nc3)CC2)n1	L4000-Targetmol-Bioactive Compound Library-5080cpds	0.418214
Cc1cc(Nc2ncc(Cl)c(Nc3ccccc3S(=O)(=O)C(C)C)n2)c(OC(C)C)cc1C1CCNCC1	L4000-Targetmol-Bioactive Compound Library-5080cpds	0.574151
c1ccc(CNc2ccccc2)cc1	L4000-Targetmol-Bioactive Compound Library-5080cpds	0.625592
c1ccc(/N=N/c2ccccc2)cc1	L4000-Targetmol-Bioactive Compound Library-5080cpds	0.324201
Cc1ccc(NC(=O)Nc2cc(C(F)(F)F)ccc2F)cc1Nc1ccc2c(c1)NC(=O)/C2=C\c1ccc[nH]1	L4000-Targetmol-Bioactive Compound Library-5080cpds	0.487721
O=C(NC1CCN(CC(F)(F)F)CC1)c1ccc(-c2cccc(F)c2)nc1	L4000-Targetmol-Bioactive Compound Library-5080cpds	0.364641
CN1CCN(c2ccc(OC(F)(F)F)c(Nc3ncc4c(n3)-c3c(c(C(N)=O)nn3CCO)CC4)c2)CC1	L4000-Targetmol-Bioactive Compound Library-5080cpds	0.643046
CC(=O)N[C@@H](CC(C)C)C(=O)N[C@@H](CC(C)C)C(=O)N[C@H](C=O)CCCNC(=N)N.CC(=O)N[C@@H](CC(C)C)C(=O)N[C@@H](CC(C)C)C(=O)N[C@H](C=O)CCCNC(=N)N.O=S(=O)(O)O	L4000-Targetmol-Bioactive Compound Library-5080cpds	0.341463
CNCCCC12CCC(c3ccccc31)c1ccccc12.Cl	L4000-Targetmol-Bioactive Compound Library-5080cpds	0.486294
COc1cc(CCc2cc(NC(=O)c3ccc(N4C[C@H](C)N[C@H](C)C4)cc3)n[nH]2)cc(OC)c1	L4000-Targetmol-Bioactive Compound Library-5080cpds	0.429443
Cn1c(=O)c(F)c(Nc2ccc(I)cc2F)c2c(=O)n(C[C@@H](O)CO)cnc21	L4000-Targetmol-Bioactive Compound Library-5080cpds	0.576812
Cc1c(OCC(F)(F)F)ccnc1CS(=O)c1nc2ccccc2[nH]1	L4000-Targetmol-Bioactive Compound Library-5080cpds	0.375
Cl.Oc1cccc(O)n1	L4000-Targetmol-Bioactive Compound Library-5080cpds	0.34375
CC(C)(C)CC(C)(C)c1cc(Cc2cc(C(C)(C)CC(C)(C)C)cc(-n3nc4ccccc4n3)c2O)c(O)c(-n2nc3ccccc3n2)c1	L4000-Targetmol-Bioactive Compound Library-5080cpds	0.411408
CNS(=O)(=O)Cc1ccc2[nH]cc(CCN(C)C)c2c1.O=C(O)CCC(=O)O	L4000-Targetmol-Bioactive Compound Library-5080cpds	0.355024
Cc1nccn1CC1CCc2c(c3ccccc3n2C)C1=O.Cl.O.O	L4000-Targetmol-Bioactive Compound Library-5080cpds	0.525275
COc1ccc(C(=O)CC2(O)C(=O)Nc3c(Cl)ccc(Cl)c32)cc1	L4000-Targetmol-Bioactive Compound Library-5080cpds	0.541295
Nc1nc(Nc2ccc3c(c2)CC[C@@H](N2CCCC2)CC3)nn1-c1cc2c(nn1)-c1ccccc1CCC2	L4000-Targetmol-Bioactive Compound Library-5080cpds	0.593407
O=c1cc(O)c(Cl)c[nH]1	L4000-Targetmol-Bioactive Compound Library-5080cpds	0.384106
CCc1cnc(N2CCC(c3nc(COc4ccc(-n5cnnn5)cc4)cs3)CC2)nc1	L4000-Targetmol-Bioactive Compound Library-5080cpds	0.418946
CC(=O)Nc1ccccc1	L4000-Targetmol-Bioactive Compound Library-5080cpds	0.459716
CCOC(=O)C1=C(C)NC(C)=C(C(=O)OCC)C1c1ccccc1/C=C/C(=O)OC(C)(C)C	L4000-Targetmol-Bioactive Compound Library-5080cpds	0.460344
NC(=O)c1cccc2cn(-c3ccc([C@@H]4CCCNC4)cc3)nc12	L4000-Targetmol-Bioactive Compound Library-5080cpds	0.405832
Cc1ccc(S(=O)(=O)O)cc1.NC(=O)c1cccc2cn(-c3ccc([C@@H]4CCCNC4)cc3)nc12	L4000-Targetmol-Bioactive Compound Library-5080cpds	0.431045
S=C(NN=C1CCCc2cccnc21)N1CCN(c2ccccn2)CC1	L4000-Targetmol-Bioactive Compound Library-5080cpds	0.446724
CO/N=C(/C(=O)N[C@@H]1C(=O)N2C(C(=O)O)=C(CSC(=O)c3ccco3)CS[C@H]12)c1csc(N)n1.Cl	L4000-Targetmol-Bioactive Compound Library-5080cpds	0.615063
CO/N=C(/C(=O)N[C@@H]1C(=O)N2C(C(=O)[O-])=C(CSC(=O)c3ccco3)CS[C@H]12)c1csc(N)n1.[Na+]	L4000-Targetmol-Bioactive Compound Library-5080cpds	0.615063
CCOC(CN1CCN(CC(C)C(=O)c2ccccc2)CC1)c1ccccc1.Cl.Cl	L4000-Targetmol-Bioactive Compound Library-5080cpds	0.440252
O=C(OC1CC2CCC(C1)[N+]21CCCC1)C(O)(c1ccccc1)c1ccccc1	L4000-Targetmol-Bioactive Compound Library-5080cpds	0.397226
N[C@@H](Cc1cc(I)c(Oc2ccc(O)cc2)c(I)c1)C(=O)O	L4000-Targetmol-Bioactive Compound Library-5080cpds	0.436387
CCC(CC)[C@H](NC(C)=O)C1[C@H](O)[C@@H](C(=O)O)C[C@H]1NC(=N)N.O.O.O	L4000-Targetmol-Bioactive Compound Library-5080cpds	0.391484
O=C1CCCC(=O)C1C(=O)c1ccc(C(F)(F)F)cc1[N+](=O)[O-]	L4000-Targetmol-Bioactive Compound Library-5080cpds	0.401478
c1cc(NC2CCNCC2)nc(-c2cnc3ccccn23)c1	L4000-Targetmol-Bioactive Compound Library-5080cpds	0.388965
CC(=O)OCC(CCn1cnc2cnc(N)nc21)COC(C)=O	L4000-Targetmol-Bioactive Compound Library-5080cpds	0.5
OCC(O)COc1ccc(Cl)cc1	L4000-Targetmol-Bioactive Compound Library-5080cpds	0.327945
CC(C)NCC(O)COc1ccc(COCCOC(C)C)cc1.CC(C)NCC(O)COc1ccc(COCCOC(C)C)cc1.O=C(O)/C=C/C(=O)O	L4000-Targetmol-Bioactive Compound Library-5080cpds	0.342067
CO/N=C(\C(=O)N[C@@H]1C(=O)N2C(C(=O)[O-])=C(CSc3nc(=O)c([O-])nn3C)CS[C@H]12)c1csc(N)n1.CO/N=C(\C(=O)N[C@@H]1C(=O)N2C(C(=O)[O-])=C(CSc3nc(=O)c([O-])nn3C)CS[C@H]12)c1csc(N)n1.O.O.O.O.O.O.O.[Na+].[Na+].[Na+].[Na+]	L4000-Targetmol-Bioactive Compound Library-5080cpds	0.642449
COc1cc(OC)c2c(=O)nc(-c3cc(C)c(OCCO)c(C)c3)[nH]c2c1	L4000-Targetmol-Bioactive Compound Library-5080cpds	0.474919
O=C(O)Cc1ccc(O)c([N+](=O)[O-])c1	L4000-Targetmol-Bioactive Compound Library-5080cpds	0.398385
CCCN[C@H]1CCc2nc(N)sc2C1	L4000-Targetmol-Bioactive Compound Library-5080cpds	0.364407
Cn1ncc(Cl)c1-c1cc(C(=O)N[C@H](CN)Cc2ccc(F)c(F)c2)oc1Cl	L4000-Targetmol-Bioactive Compound Library-5080cpds	0.509772
Cn1ncc(Cl)c1-c1cc(C(=O)N[C@H](CN)Cc2cccc(F)c2)sc1Cl	L4000-Targetmol-Bioactive Compound Library-5080cpds	0.498078
COCCOc1nc(-c2ccc(Cl)c(Cl)c2)n(-c2ccc(NC(=O)CCl)cc2)n1	L4000-Targetmol-Bioactive Compound Library-5080cpds	0.445714
O=C(COc1cccc2c(=O)[nH]ccc12)c1ccccc1	L4000-Targetmol-Bioactive Compound Library-5080cpds	0.464692
C=CC(=O)Nc1ccc2ncnc(Nc3ccc(OCc4cccc(F)c4)c(Cl)c3)c2c1.Cc1ccc(S(=O)(=O)O)cc1	L4000-Targetmol-Bioactive Compound Library-5080cpds	0.668309
C[C@H]1CO[C@@H]2Cn3cc(C(=O)NCc4ccc(F)cc4F)c(=O)c(O)c3C(=O)N12	L4000-Targetmol-Bioactive Compound Library-5080cpds	0.620472
C[C@@H]1CCO[C@H]2Cn3cc(C(=O)NCc4ccc(F)cc4F)c(=O)c(O)c3C(=O)N21	L4000-Targetmol-Bioactive Compound Library-5080cpds	0.629396
C[C@@H]1CCO[C@H]2Cn3cc(C(=O)NCc4ccc(F)cc4F)c(=O)c([O-])c3C(=O)N21.[Na+]	L4000-Targetmol-Bioactive Compound Library-5080cpds	0.629396
O=C1Nc2ccc(S(=O)(=O)NCc3ccc(F)cc3)cc2/C1=N/Nc1cccc(C(=O)O)c1	L4000-Targetmol-Bioactive Compound Library-5080cpds	0.475975
COc1ccc(CCNCc2ccc(OCc3ccc(Cl)nc3)c(OC)c2)cc1OC.Cl	L4000-Targetmol-Bioactive Compound Library-5080cpds	0.498423
CC(C)(C)c1cc(C=C(C#N)C#N)cc(C(C)(C)C)c1O	L4000-Targetmol-Bioactive Compound Library-5080cpds	0.433962
COc1ccc(-c2nc(-c3cc(C(F)(F)F)cc(C(F)(F)F)c3)n(Cc3ccc(C(N)=O)cc3)c2-c2ccc(OC)cc2)cc1	L4000-Targetmol-Bioactive Compound Library-5080cpds	0.513669
O=P(O)(O)C(O)(Cc1cccnc1)P(=O)(O)O	L4000-Targetmol-Bioactive Compound Library-5080cpds	0.421907
Cc1cc(C)c(/C=C2\C(=O)Nc3ccc(Cl)cc32)[nH]1	L4000-Targetmol-Bioactive Compound Library-5080cpds	0.450867
Cl.O=S(=O)(c1cccc2cnccc12)N1CCCNCC1	L4000-Targetmol-Bioactive Compound Library-5080cpds	0.492386
CN(C)CCC=C1c2ccccc2C(C)(C)c2ccccc21.Cl	L4000-Targetmol-Bioactive Compound Library-5080cpds	0.477296
N#CCNC(=O)c1ccc(-c2ccnc(Nc3ccc(N4CCOCC4)cc3)n2)cc1	L4000-Targetmol-Bioactive Compound Library-5080cpds	0.474756
NC[C@@](O)(c1ccc(Cl)cc1)c1ccc(-c2cn[nH]c2)cc1	L4000-Targetmol-Bioactive Compound Library-5080cpds	0.429622
COc1cc2c(Oc3ccc4[nH]c(C)cc4c3F)ccnc2cc1OCC1(N)CC1	L4000-Targetmol-Bioactive Compound Library-5080cpds	0.464595
CC(C)[C@H]1CC[C@H](C(=O)N[C@H](Cc2ccccc2)C(=O)O)CC1	L4000-Targetmol-Bioactive Compound Library-5080cpds	0.419766
CN1[C@H]2CC[C@@H]1C[C@H](OC(=O)c1c[nH]c3ccccc13)C2.Cl	L4000-Targetmol-Bioactive Compound Library-5080cpds	0.397531
NC1CCN(c2c(F)cc3c(=O)c(C(=O)O)cn(C4CC4)c3c2Cl)C1	L4000-Targetmol-Bioactive Compound Library-5080cpds	0.587948
CNCc1ccc(C)c(NC(=O)c2ccc(Nc3nc(-c4ccccc4)c4ccccc4n3)cc2)c1	L4000-Targetmol-Bioactive Compound Library-5080cpds	0.552668
COC(=O)Nc1nc2ccccc2[nH]1	L4000-Targetmol-Bioactive Compound Library-5080cpds	0.490835
CNC(=O)c1ccccc1Nc1cc(Nc2ccc(N3CCOCC3)cc2OC)ncc1C(F)(F)F	L4000-Targetmol-Bioactive Compound Library-5080cpds	0.561772
COC(=O)Nc1ccc(-c2nc(N3CCOCC3)c3cnn(C4CCN(C(=O)OC)CC4)c3n2)cc1	L4000-Targetmol-Bioactive Compound Library-5080cpds	0.606042
COc1cc(C(=O)NC2CCN(C)CC2)ccc1Nc1ncc2c(n1)N(C1CCCC1)CC(F)(F)C(=O)N2C	L4000-Targetmol-Bioactive Compound Library-5080cpds	0.601102
c1ccc2c(-c3cnn4cc(-c5ccc(N6CCNCC6)cc5)cnc34)ccnc2c1	L4000-Targetmol-Bioactive Compound Library-5080cpds	0.466463
COc1ccc(-c2cnc3c(-c4cccc5ncccc45)cnn3c2)cc1	L4000-Targetmol-Bioactive Compound Library-5080cpds	0.45614
Cc1nc2n(c(=O)c1CCN1CCC(c3noc4cc(F)ccc34)CC1)CCCC2	L4000-Targetmol-Bioactive Compound Library-5080cpds	0.54793
NC(=O)c1cn(Cc2c(F)cccc2F)nn1	L4000-Targetmol-Bioactive Compound Library-5080cpds	0.46334
CC(C)c1cc(/C=C(\C#N)C(N)=O)cc(C(C)C)c1O	L4000-Targetmol-Bioactive Compound Library-5080cpds	0.476923
CCOc1ccccc1OCCN[C@H](C)Cc1ccc(OC)c(S(N)(=O)=O)c1.Cl	L4000-Targetmol-Bioactive Compound Library-5080cpds	0.40118
COc1ccc(-c2ccc3cc(C(=O)O)ccc3c2)cc1C12CC3CC(CC(C3)C1)C2	L4000-Targetmol-Bioactive Compound Library-5080cpds	0.393631
Cc1[nH]c(=O)c(C#N)cc1-c1ccc2nccn2c1	L4000-Targetmol-Bioactive Compound Library-5080cpds	0.397887
CCCC(CCC)C(=O)[O-].[Na+]	L4000-Targetmol-Bioactive Compound Library-5080cpds	0.342105
CN1[C@H]2CCC[C@@H]1C[C@H](NC(=O)c1nn(C)c3ccccc13)C2.Cl	L4000-Targetmol-Bioactive Compound Library-5080cpds	0.410872
COc1ccc2[nH]cc(C3=CCNCC3)c2c1.COc1ccc2[nH]cc(C3=CCNCC3)c2c1.O=C(O)CCC(=O)O	L4000-Targetmol-Bioactive Compound Library-5080cpds	0.398533
CC[C@@H](CO)NCCN[C@@H](CC)CO.Cl.Cl	L4000-Targetmol-Bioactive Compound Library-5080cpds	0.314741
CCCCCN(CCCOC)C(=O)C(CCC(=O)O)NC(=O)c1ccc(Cl)c(Cl)c1	L4000-Targetmol-Bioactive Compound Library-5080cpds	0.366947
CC(C)(C)N.CCC[C@H](N[C@@H](C)C(=O)N1[C@H](C(=O)O)C[C@@H]2CCCC[C@@H]21)C(=O)OCC	L4000-Targetmol-Bioactive Compound Library-5080cpds	0.385638
CN[C@@H](C)C(=O)N[C@H]1CN(C(=O)CC(C)C)CC[C@H]2CC[C@@H](C(=O)NC(c3ccccc3)c3ccccc3)N2C1=O	L4000-Targetmol-Bioactive Compound Library-5080cpds	0.382166
CC(C)C[C@H](NC(=O)CNC(=O)c1cc(Cl)ccc1Cl)B(O)O	L4000-Targetmol-Bioactive Compound Library-5080cpds	0.488959
CNC(=O)c1ccc(Nc2ncc(C(F)(F)F)c(NCc3nccnc3N(C)S(C)(=O)=O)n2)cc1	L4000-Targetmol-Bioactive Compound Library-5080cpds	0.533293
COc1ccccc1-c1cc(Nc2cccc(CS(N)(=O)=O)c2)ncn1	L4000-Targetmol-Bioactive Compound Library-5080cpds	0.438276
O=C(O)c1ccc(/C=C2\SC(=S)N(Cc3cccc(C(F)(F)F)c3)C2=O)cc1	L4000-Targetmol-Bioactive Compound Library-5080cpds	0.398442
NCCC(=O)N1[Zn]OC(=O)[C@@H]1Cc1cnc[nH]1	L4000-Targetmol-Bioactive Compound Library-5080cpds	0.38101
CCN1C[C@]2(COC)CC[C@H](OC)[C@]34C1[C@@H]([C@H](OC)C23)[C@@]1(OC(C)=O)C[C@H](OC)[C@]2(O)C[C@@H]4C1[C@H]2C(=O)c1ccc(OC)cc1	L4000-Targetmol-Bioactive Compound Library-5080cpds	0.504535
COC(=O)[C@@H]1CC2=CC(=O)CC[C@]2(C)[C@@]23O[C@@H]2C[C@@]2(C)[C@@H](CC[C@@]24CCC(=O)O4)C13	L4000-Targetmol-Bioactive Compound Library-5080cpds	0.663805
COc1cc(C(=O)NS(=O)(=O)c2ccccc2C)ccc1Cc1cn(C)c2ccc(NC(=O)OC3CCCC3)cc12	L4000-Targetmol-Bioactive Compound Library-5080cpds	0.539726
COc1ccc2cc(OCC3(C(=O)O)CN(C(=O)c4ccc(F)cc4)C3)ccc2c1	L4000-Targetmol-Bioactive Compound Library-5080cpds	0.380531
Cl.NCC(CC(=O)O)c1ccccc1	L4000-Targetmol-Bioactive Compound Library-5080cpds	0.429175
C=C1C[C@@H]2[C@H](CC[C@]3(C)C(=O)CC[C@@H]23)[C@@]2(C)C=CC(=O)C=C12	L4000-Targetmol-Bioactive Compound Library-5080cpds	0.470138
CC[C@H]1OC(=O)C[C@@H](O)[C@H](C)[C@@H](O[C@@H]2O[C@H](C)[C@@H](O)[C@H](N(C)C)[C@H]2O)[C@@H](CCN2C[C@@H](C)C[C@@H](C)C2)C[C@@H](C)C(=O)/C=C/C(C)=C/[C@@H]1CO[C@@H]1O[C@H](C)[C@@H](O)[C@@H](OC)[C@H]1OC	L4000-Targetmol-Bioactive Compound Library-5080cpds	0.493429
COc1cc2ncnc(-n3nc(-c4ccccn4)nc3N)c2cc1OC	L4000-Targetmol-Bioactive Compound Library-5080cpds	0.533107
CC(CN1CC(=O)N(CN2CCOCC2)C(=O)C1)N1CC(=O)N(CN2CCOCC2)C(=O)C1	L4000-Targetmol-Bioactive Compound Library-5080cpds	0.339896
Cc1ccc(S(=O)(=O)O)cc1.Cn1cc(-c2ccc(F)c(C(F)(F)F)c2)nc1C1CCN(c2ncnc3[nH]ncc23)CC1	L4000-Targetmol-Bioactive Compound Library-5080cpds	0.538715
O=S(=O)(NC1CCCCC1)c1ccc2c(c1)C(=NO)c1cc(S(=O)(=O)NC3CCCCC3)ccc1-2	L4000-Targetmol-Bioactive Compound Library-5080cpds	0.387398
NC[C@H](O)c1ccc(O)c(O)c1.O.O=C(O)[C@H](O)[C@@H](O)C(=O)O	L4000-Targetmol-Bioactive Compound Library-5080cpds	0.45815
CCOc1ccc(NC(=O)CC(C)O)cc1	L4000-Targetmol-Bioactive Compound Library-5080cpds	0.501449
Cc1cc([N+](=O)[O-])ccc1NS(=O)(=O)c1cc(Cl)ccc1Cl	L4000-Targetmol-Bioactive Compound Library-5080cpds	0.345725
Oc1cccc(O)c1	L4000-Targetmol-Bioactive Compound Library-5080cpds	0.355372
Cc1cc2c(cc1S(N)(=O)=O)S(=O)(=O)CCC2	L4000-Targetmol-Bioactive Compound Library-5080cpds	0.364557
NCCOc1cc(C(=O)Nc2cc(OCCN)c3ccccc3n2)nc(C(=O)Nc2cc(OCCN)c3ccccc3n2)c1	L4000-Targetmol-Bioactive Compound Library-5080cpds	0.455501
CC(O)=C(C#N)C(=O)Nc1ccc(C(F)(F)F)cc1	L4000-Targetmol-Bioactive Compound Library-5080cpds	0.382082
COc1ncc(-c2ccc3nccc(-c4ccnnc4)c3c2)cc1NS(=O)(=O)c1ccc(F)cc1F	L4000-Targetmol-Bioactive Compound Library-5080cpds	0.500592
CN(c1nccc(=O)[nH]1)C1CCN(c2nc3ccccc3n2Cc2ccc(F)cc2)CC1	L4000-Targetmol-Bioactive Compound Library-5080cpds	0.413625
CC(C)Oc1ccc(C(=O)N[C@H](CNC(=O)CN(C)C)Cc2ccc(-c3cn4cccc([C@H](C)O)c4n3)cc2)cc1Cl	L4000-Targetmol-Bioactive Compound Library-5080cpds	0.502825
CCc1cc(Nc2nccc(-c3c(-c4ccc(OC)c(C(=O)Nc5c(F)cccc5F)c4)nc4ccccn34)n2)c(OC)cc1N1CCC(N2CCN(S(C)(=O)=O)CC2)CC1	L4000-Targetmol-Bioactive Compound Library-5080cpds	0.682283
CC(C)n1nc(-c2cc3cc(O)ccc3[nH]2)c2c(N)ncnc21	L4000-Targetmol-Bioactive Compound Library-5080cpds	0.702842
C=CC(=O)N1CCC(Oc2cc3c(Nc4ccc(Cl)c(Cl)c4F)ncnc3cc2OC)CC1	L4000-Targetmol-Bioactive Compound Library-5080cpds	1
CC(C)c1cnn2c(NCc3ccccc3)cc(NCCCCCCN)nc12	L4000-Targetmol-Bioactive Compound Library-5080cpds	0.448023
Fc1cc(-c2cccc3ncc(-c4cnn(C5CCNCC5)c4)nc23)cc(F)c1CN1CCOCC1	L4000-Targetmol-Bioactive Compound Library-5080cpds	0.532444
CCn1c(N)c(C(=O)NC)c(=O)c2ccc(C#CC(C)(O)COC)nc21	L4000-Targetmol-Bioactive Compound Library-5080cpds	0.561491
COc1ccccc1N1CCN(CCN(C(=O)C2CCCCC2)c2ccccn2)CC1.O=C(O)/C=C\C(=O)O	L4000-Targetmol-Bioactive Compound Library-5080cpds	0.456094
Nc1ncnc2c1c(-c1cnc3[nH]ccc3c1)nn2C1CCCC1	L4000-Targetmol-Bioactive Compound Library-5080cpds	0.767132
N#CC[C@H](C1CCCC1)n1cc(-c2ncnc3[nH]ccc23)cn1.O=P(O)(O)O	L4000-Targetmol-Bioactive Compound Library-5080cpds	0.465397
Cc1ccc2c(Nc3ccc(Cl)cc3)nccc2c1Nc1ncccc1-c1ncnc2[nH]cnc12	L4000-Targetmol-Bioactive Compound Library-5080cpds	0.535083
Cc1nc(-c2cccnc2)sc1C(=O)Nc1ccccc1-c1cn2c(CN3CCOCC3)csc2n1	L4000-Targetmol-Bioactive Compound Library-5080cpds	0.584085
O=C(Nc1cc(Cl)cc(Cl)c1)[C@H]1CCCC[C@H]1C(=O)O	L4000-Targetmol-Bioactive Compound Library-5080cpds	0.428058
CCOc1ccc(-c2nc(-c3cccc4c3CCC4NCCO)no2)cc1OCC	L4000-Targetmol-Bioactive Compound Library-5080cpds	0.491859
CN(C)Cc1cccc(N/C(=C2\C(=O)Nc3cc(C(N)=O)ccc32)c2ccccc2)c1	L4000-Targetmol-Bioactive Compound Library-5080cpds	0.481808
CN(C)Cc1cccc(N/C(=C2\C(=O)Nc3cc(C(=O)N(C)C)ccc32)c2ccccc2)c1	L4000-Targetmol-Bioactive Compound Library-5080cpds	0.487104
CCN(CC)C(=O)C(c1ccccc1)N1CCN(c2ccc(NC(=O)c3ccccc3-c3cccnc3)cc2F)CC1	L4000-Targetmol-Bioactive Compound Library-5080cpds	0.513412
Cc1cc(CN2CCN(c3c(Br)cnc4nc(-c5ccc(N6CCN(C)CC6)cc5)[nH]c34)CC2)no1	L4000-Targetmol-Bioactive Compound Library-5080cpds	0.504816
C=CCNC(N)=S	L4000-Targetmol-Bioactive Compound Library-5080cpds	0.453125
C[C@@H](NC(=O)c1ncnc(N)c1Cl)c1ncc(C(=O)Nc2cc(C(F)(F)F)c(Cl)cn2)s1	L4000-Targetmol-Bioactive Compound Library-5080cpds	0.544805
COc1cc(N2CCC(N3CCN(C)CC3)CC2)ccc1Nc1ncnc(Nc2ccccc2S(=O)(=O)C(C)C)n1	L4000-Targetmol-Bioactive Compound Library-5080cpds	0.563091
CN(C)CCCN1c2ccccc2Sc2ccc(C(F)(F)F)cc21.Cl	L4000-Targetmol-Bioactive Compound Library-5080cpds	0.368741
CCOC(=O)C1=C(C)NC2=C(C(=O)CC(C)(C)C2)C1c1ccc(-c2ccccc2)cc1	L4000-Targetmol-Bioactive Compound Library-5080cpds	0.514889
CC/C(=C(\c1ccc(O)cc1)c1ccc(OCCNC)cc1)c1ccccc1	L4000-Targetmol-Bioactive Compound Library-5080cpds	0.434286
CN1CCC(COc2cnc(-c3cccc(Cn4nc(-c5cccc(C#N)c5)ccc4=O)c3)nc2)CC1	L4000-Targetmol-Bioactive Compound Library-5080cpds	0.45786
C=Cc1c(C)c2cc3nc(c(CC(=O)[O-])c4[n-]c(cc5nc(cc1[n-]2)C(C)=C5CC)c(C)c4C(=O)[O-])C(CCC(=O)[O-])C3C.[Cu+2].[Na+].[Na+].[Na+]	L4000-Targetmol-Bioactive Compound Library-5080cpds	0.577472
c1cc(CN2CCCNCCNCCCNCC2)ccc1CN1CCCNCCNCCCNCC1	L4000-Targetmol-Bioactive Compound Library-5080cpds	0.416107
Cn1cc(C[C@@H](N)C(=O)O)c2ccccc21	L4000-Targetmol-Bioactive Compound Library-5080cpds	0.342697
O=C(Oc1ccc([N+](=O)[O-])cc1)N1CCC(C(O)(c2ccc3c(c2)OCO3)c2ccc3c(c2)OCO3)CC1	L4000-Targetmol-Bioactive Compound Library-5080cpds	0.43248
CCOC(=O)[C@H](CCc1ccccc1)N[C@H]1CS[C@H](c2cccs2)CN(CC(=O)O)C1=O.Cl	L4000-Targetmol-Bioactive Compound Library-5080cpds	0.447501
O=C(OCC1=C[C@@H](O)[C@@H]2C=CO[C@@H](O[C@@H]3O[C@H](CO)[C@@H](O)[C@H](O)[C@H]3O)[C@H]12)c1ccc(O)cc1	L4000-Targetmol-Bioactive Compound Library-5080cpds	0.488784
O=C(COCC(=O)N1CCN(C(c2ccccc2)c2ccccc2)CC1)Nc1ccc(Cl)cc1C(=O)[O-].[Na+]	L4000-Targetmol-Bioactive Compound Library-5080cpds	0.403493
Cc1cccc(CN2CCN(C(c3ccccc3)c3ccc(Cl)cc3)CC2)c1.Cl.Cl	L4000-Targetmol-Bioactive Compound Library-5080cpds	0.464873
Cl.O=S(=O)(c1cccc2c(I)cccc12)N1CCCNCC1	L4000-Targetmol-Bioactive Compound Library-5080cpds	0.485597
CCCCCC(=O)N[C@@H](Cc1ccc(O)cc1)C(=O)OC	L4000-Targetmol-Bioactive Compound Library-5080cpds	0.432203
CC(C(=O)Nc1cccc(/N=C/c2c(O)ccc3ccccc23)c1)c1ccccc1	L4000-Targetmol-Bioactive Compound Library-5080cpds	0.484694
CC1(N2CCC(n3c([C@@H]4CCCNC4)nc4ccccc43)CC2)CCCCCCC1.Cl.Cl.Cl	L4000-Targetmol-Bioactive Compound Library-5080cpds	0.433743
C1CNCCN1	L4000-Targetmol-Bioactive Compound Library-5080cpds	0.28125
C[C@H]1CN(c2c(F)c(N)c3c(=O)c(C(=O)O)cn(C4CC4)c3c2F)C[C@@H](C)N1	L4000-Targetmol-Bioactive Compound Library-5080cpds	0.597154
CN1CCN(c2ccc(C(=O)Nc3n[nH]c4ccc(Cc5cc(F)cc(F)c5)cc34)c(NC3CCOCC3)c2)CC1	L4000-Targetmol-Bioactive Compound Library-5080cpds	0.509887
CC1=C(C(=O)OCCN(Cc2ccccc2)c2ccccc2)C(c2cccc([N+](=O)[O-])c2)C(P2(=O)OCC(C)(C)CO2)=C(C)N1	L4000-Targetmol-Bioactive Compound Library-5080cpds	0.640625
CCc1ccc(CCOc2ccc(CC3SC(=O)NC3=O)cc2)nc1	L4000-Targetmol-Bioactive Compound Library-5080cpds	0.361345
CCCCCCCC/C=C\CCCCCCCC(=O)OCC(O)CO	L4000-Targetmol-Bioactive Compound Library-5080cpds	0.535865
COc1cc2ncnc(Nc3ccc(F)c(Cl)c3)c2cc1NC(=O)/C=C/CN1CCCCC1	L4000-Targetmol-Bioactive Compound Library-5080cpds	0.89843
CCCn1c(NC(=O)c2cccc(C(N)=O)c2)nc2ccccc21	L4000-Targetmol-Bioactive Compound Library-5080cpds	0.423288
CC(c1cc2ccccc2s1)N(O)C(N)=O	L4000-Targetmol-Bioactive Compound Library-5080cpds	0.332471
CCOC(=O)C1=C(COCCN)NC(C)=C(C(=O)OC)C1c1ccccc1Cl.O=S(=O)(O)c1ccccc1	L4000-Targetmol-Bioactive Compound Library-5080cpds	0.491285
CN(C)C(=N)N=C(N)N.Cl	L4000-Targetmol-Bioactive Compound Library-5080cpds	0.433071
CNC(=O)c1c(F)cccc1Nc1nc(Nc2cc3c(cc2OC)CCN3C(=O)CN(C)C)nc2[nH]ccc12	L4000-Targetmol-Bioactive Compound Library-5080cpds	0.654258
COc1ccc(C(=O)/C=C/c2cc(OC)c(OC)c(OC)c2)cc1OC	L4000-Targetmol-Bioactive Compound Library-5080cpds	0.561622
COc1ccc(C2C(C#N)=C(N)OC3=C2C(=O)CC(c2cccc4ccccc24)C3)cc1	L4000-Targetmol-Bioactive Compound Library-5080cpds	0.534783
CN(C)CC(=O)O	L4000-Targetmol-Bioactive Compound Library-5080cpds	0.307087
COc1ccc(CCC(=O)Nc2nc3ccc(Cl)cc3s2)cc1OC	L4000-Targetmol-Bioactive Compound Library-5080cpds	0.497191
O=C(O)/C=C/C(=O)O.OCCOCCN1CCN(C2=Nc3ccccc3Sc3ccccc32)CC1.OCCOCCN1CCN(C2=Nc3ccccc3Sc3ccccc32)CC1	L4000-Targetmol-Bioactive Compound Library-5080cpds	0.413018
NCC1CCN(c2nccc(-c3ccc4ccccc4c3)n2)CC1	L4000-Targetmol-Bioactive Compound Library-5080cpds	0.486643
COCCNCc1ccc(-c2cc3nccc(Oc4ccc(NC(=O)C5(C(=O)Nc6ccc(F)cc6)CC5)cc4F)c3s2)nc1	L4000-Targetmol-Bioactive Compound Library-5080cpds	0.560451
COc1cc(OC2CCN(C)CC2)ccc1Nc1ncc2c(n1)n(C1CCCC1)c(=O)n2C	L4000-Targetmol-Bioactive Compound Library-5080cpds	0.630374
CC(=O)Nc1ccc(C(=O)Nc2ccccc2N)cc1	L4000-Targetmol-Bioactive Compound Library-5080cpds	0.542222
CCc1ccc(CCOc2ccc(CC3SC(=O)NC3=O)cc2)nc1.Cl	L4000-Targetmol-Bioactive Compound Library-5080cpds	0.361345
C[C@H](N=C(NC#N)Nc1cccc2ncccc12)c1ccccc1	L4000-Targetmol-Bioactive Compound Library-5080cpds	0.348148
CNC(=O)c1cc(Oc2ccc(NC(=O)c3cccc(C(F)(F)F)c3)cc2)ccn1	L4000-Targetmol-Bioactive Compound Library-5080cpds	0.471609
COc1ccc2[nH]c(C(=O)N3CCC(CC(C)(C)O)CC3)cc2c1	L4000-Targetmol-Bioactive Compound Library-5080cpds	0.407555
COc1ccc2c(c1)CC[C@@H]1[C@@H]2CC[C@]2(C)[C@@H](NCCCCCCN3C(=O)C=CC3=O)CC[C@@H]12	L4000-Targetmol-Bioactive Compound Library-5080cpds	0.417596
CC1=C(C)C(=O)C(c2cccc(CCCCCCC(=O)O)c2)=C(C)C1=O	L4000-Targetmol-Bioactive Compound Library-5080cpds	0.400504
O=C(Nc1cccc2cccnc12)c1ccc(N2C(=O)[C@@H]3[C@@H]4C=C[C@@H](C4)[C@H]3C2=O)cc1	L4000-Targetmol-Bioactive Compound Library-5080cpds	0.473125
N#Cc1ccc(C(c2ccc(C#N)cc2)n2cncn2)cc1	L4000-Targetmol-Bioactive Compound Library-5080cpds	0.371711
COc1c(N2CCNC(C)C2)c(F)cc2c(=O)c(C(=O)O)cn(C3CC3)c12	L4000-Targetmol-Bioactive Compound Library-5080cpds	0.599784
CCOc1cc(N)c(Cl)cc1C(=O)NCC1CN(Cc2ccc(F)cc2)CCO1.O=C(O)CC(O)(CC(=O)O)C(=O)O	L4000-Targetmol-Bioactive Compound Library-5080cpds	0.437103
Cc1nc2ccc(CN(C)c3ccc(C(=O)N[C@@H](CCC(=O)O)C(=O)O)s3)cc2c(=O)[nH]1	L4000-Targetmol-Bioactive Compound Library-5080cpds	0.483816
CCN(CC)CCNC(=O)c1c(C)[nH]c(/C=C2\C(=O)Nc3ccc(-c4csc(-c5ccccc5)n4)cc32)c1C	L4000-Targetmol-Bioactive Compound Library-5080cpds	0.597977
Cc1[nH]c2ccccc2c1C1=C(NCCc2ccc(F)cc2)C(=O)N(C)C1=O	L4000-Targetmol-Bioactive Compound Library-5080cpds	0.54015
COc1c(-c2ccc3cc(NS(C)(=O)=O)ccc3c2)cc(-n2ccc(=O)[nH]c2=O)cc1C(C)(C)C	L4000-Targetmol-Bioactive Compound Library-5080cpds	0.489063
COc1cccc(C(=O)COc2ccc(CC3SC(=O)NC3=O)cc2)c1	L4000-Targetmol-Bioactive Compound Library-5080cpds	0.374462
CCC(=O)Oc1ccc2c(c1)CC[C@@H]1[C@@H]2CC[C@]2(C)[C@@H](OC(=O)CC)CC[C@@H]12	L4000-Targetmol-Bioactive Compound Library-5080cpds	0.518868
NCC(CC(=O)O)c1ccc(Cl)cc1	L4000-Targetmol-Bioactive Compound Library-5080cpds	0.48954
CO/N=C1\C[C@]2(C[C@@H]3C[C@@H](C/C=C(\C)C[C@@H](C)/C=C/C=C4\CO[C@@H]5[C@H](O)C(C)=C[C@@H](C(=O)O3)[C@]45O)O2)O[C@H](/C(C)=C/C(C)C)[C@H]1C	L4000-Targetmol-Bioactive Compound Library-5080cpds	0.535354
CCOC(=O)N1CCC(NCCNC(=O)c2ccccc2C)CC1.Cl	L4000-Targetmol-Bioactive Compound Library-5080cpds	0.46545
COc1ccc(S(=O)(=O)Nc2ccccc2CN(C)C/C=C/c2ccc(Cl)cc2)cc1.O=P(O)(O)O	L4000-Targetmol-Bioactive Compound Library-5080cpds	0.371233
CC(C)[C@H](NC(=O)c1ccc2ccccc2n1)C(=O)N[C@@H](CC(=O)O)C(=O)COc1c(F)cccc1F	L4000-Targetmol-Bioactive Compound Library-5080cpds	0.477546
CN(C)CC/C=C1\c2ccccc2Sc2ccc(Cl)cc21	L4000-Targetmol-Bioactive Compound Library-5080cpds	0.354248
C[C@H]1CN(c2c(F)c(F)c3c(=O)c(C(=O)O)cn(C4CC4)c3c2F)C[C@@H](C)N1	L4000-Targetmol-Bioactive Compound Library-5080cpds	0.603226
COc1ccc2[nH]c(S(=O)Cc3ncc(C)c(OC)c3C)nc2n1	L4000-Targetmol-Bioactive Compound Library-5080cpds	0.461758
CCOC(=O)c1ccc(NC(=O)O[C@H]2[C@H](OC(=O)Nc3ccc4c(c3)OCO4)[C@@H](OC(=O)Nc3ccc4c(c3)OCO4)[C@@H](OC)O[C@@H]2CO)cc1	L4000-Targetmol-Bioactive Compound Library-5080cpds	0.459784
CCOC(=O)[C@@H](N)Cc1ccc(-c2cc(O[C@H](c3ccc(Cl)cc3-n3ccc(C)n3)C(F)(F)F)nc(N)n2)cc1.O=C(O)CNC(=O)c1ccccc1	L4000-Targetmol-Bioactive Compound Library-5080cpds	0.587859
Cc1cccc([C@H](C)c2cnc[nH]2)c1C	L4000-Targetmol-Bioactive Compound Library-5080cpds	0.420998
Nc1ccn(C[C@@H](CO)OCP(=O)(O)O)c(=O)n1	L4000-Targetmol-Bioactive Compound Library-5080cpds	0.465217
Cc1cnc(CNC(=O)c2c(=O)c3ccc(N4CCCN(C)CC4)nc3n3c2sc2ccccc23)cn1	L4000-Targetmol-Bioactive Compound Library-5080cpds	0.626119
CN(C)CCC(c1ccc(Cl)cc1)c1ccccn1.O=C(O)/C=C\C(=O)O	L4000-Targetmol-Bioactive Compound Library-5080cpds	0.45362
COc1cc2nccc(Oc3ccc(NC(=O)C4(C(=O)Nc5ccc(F)cc5)CC4)cc3)c2cc1OC.O=C(O)C[C@H](O)C(=O)O	L4000-Targetmol-Bioactive Compound Library-5080cpds	0.476762
CNC(=O)Oc1ccccc1OC(C)C	L4000-Targetmol-Bioactive Compound Library-5080cpds	0.469388
O=C1c2c(O)cccc2Cc2cccc(O)c21	L4000-Targetmol-Bioactive Compound Library-5080cpds	0.408397
NC1(C(=O)N[C@@H](CCO)c2ccc(Cl)cc2)CCN(c2ncnc3[nH]ccc23)CC1	L4000-Targetmol-Bioactive Compound Library-5080cpds	0.503698
O=C(CCN1CCN(C(=O)OCc2cc(Cl)cc(Cl)c2)CC1)c1ccc2[nH]c(=O)oc2c1	L4000-Targetmol-Bioactive Compound Library-5080cpds	0.411188
COc1ccc(CCN(C)CCCOc2ccc(S(=O)(=O)c3c(C(C)C)cn4ccccc34)cc2)cc1OC	L4000-Targetmol-Bioactive Compound Library-5080cpds	0.492471
CS(=O)(=O)O.O=C(Nc1cccc(Cl)c1)Nc1ncc(CCNc2ncnc3ccsc23)s1	L4000-Targetmol-Bioactive Compound Library-5080cpds	0.460929
COc1cccc(/C=N/N(C(=O)C(F)(F)F)c2ccc(C)cc2C)c1	L4000-Targetmol-Bioactive Compound Library-5080cpds	0.40227
O=C1c2ccccc2C(=O)C1c1ccc(Br)cc1	L4000-Targetmol-Bioactive Compound Library-5080cpds	0.445476
O=C1c2ccccc2C(=O)C1c1ccc(Cl)cc1	L4000-Targetmol-Bioactive Compound Library-5080cpds	0.444674
CCCCc1nc(Cl)c(CO)n1Cc1ccc(-c2ccccc2-c2nn[nH]n2)cc1	L4000-Targetmol-Bioactive Compound Library-5080cpds	0.437883
CN(C)C(=O)Oc1cccc([N+](C)(C)C)c1.[Br-]	L4000-Targetmol-Bioactive Compound Library-5080cpds	0.513043
C=C1CC[C@]2(C(=O)O[C@@H]3O[C@H](CO[C@@H]4O[C@H](CO)[C@@H](O[C@@H]5O[C@@H](C)[C@H](O)[C@@H](O)[C@H]5O)[C@H](O)[C@H]4O)[C@@H](O)[C@H](O)[C@H]3O)CC[C@]3(C)C(=CC[C@@H]4[C@@]5(C)CC[C@@H](O[C@@H]6OC[C@H](O)[C@H](O)[C@H]6O[C@@H]6O[C@@H](C)[C@H](O)[C@@H](O)[C@H]6O)C(C)(C)[C@@H]5CC[C@]43C)[C@@H]2C1	L4000-Targetmol-Bioactive Compound Library-5080cpds	0.67475
CC[C@@H](C)Nc1cc(C(=O)NC2CC3CCC(C2)N3c2ccc(C(=O)C3CC3)cn2)c(C)cc1C(N)=O	L4000-Targetmol-Bioactive Compound Library-5080cpds	0.535314
Cc1ccsc1C(=CCCN1CCC[C@@H](C(=O)O)C1)c1sccc1C	L4000-Targetmol-Bioactive Compound Library-5080cpds	0.3891
CN(C)C(=O)CCSC(SCCC(=O)[O-])c1cccc(/C=C/c2ccc3ccc(Cl)cc3n2)c1.[Na+]	L4000-Targetmol-Bioactive Compound Library-5080cpds	0.389527
CC(C)(CO)c1cc2cc(NC(=O)C3(c4ccc5c(c4)OC(F)(F)O5)CC3)c(F)cc2n1C[C@@H](O)CO	L4000-Targetmol-Bioactive Compound Library-5080cpds	0.582299
CN(CCOc1ccc(NS(C)(=O)=O)cc1)CCc1ccc(NS(C)(=O)=O)cc1	L4000-Targetmol-Bioactive Compound Library-5080cpds	0.400773
O=c1c(-n2ccnn2)c[nH]n1-c1cc(N2CCOCC2)ncn1	L4000-Targetmol-Bioactive Compound Library-5080cpds	0.483996
O=P([O-])(O)C(O)(Cc1cccnc1)P(=O)(O)O.[Na+]	L4000-Targetmol-Bioactive Compound Library-5080cpds	0.421907
OC(c1ccccc1)(c1ccccc1)C1CCNCC1	L4000-Targetmol-Bioactive Compound Library-5080cpds	0.413395
CN1CCN(c2c(F)cc3c(=O)c(C(=O)O)cn4c3c2OCN4C)CC1	L4000-Targetmol-Bioactive Compound Library-5080cpds	0.60203
Cc1ccc(S(=O)(=O)NC(=O)NN2CCCCCC2)cc1	L4000-Targetmol-Bioactive Compound Library-5080cpds	0.409613
C=CC1C2=CCOC(=O)C2=COC1OC1OC(COC2OC(CO)C(O)C(O)C2O)C(O)C(O)C1O	L4000-Targetmol-Bioactive Compound Library-5080cpds	0.451728
CCn1c2ccccc2c2cc(CNCc3ccccc3OC)ccc21.Cl	L4000-Targetmol-Bioactive Compound Library-5080cpds	0.50463
O=C(O[C@@H]1C[C@@H]2C[C@@H]3C[C@H](C1)N2CC3=O)c1c[nH]c2ccccc12	L4000-Targetmol-Bioactive Compound Library-5080cpds	0.419048
CC(C)(C)NS(=O)(=O)c1cncc(-c2cc(F)c3nc(N)nn3c2)c1	L4000-Targetmol-Bioactive Compound Library-5080cpds	0.482958
O=C(O)CCCCCC(=O)N/N=C/c1ccccc1C(=O)O	L4000-Targetmol-Bioactive Compound Library-5080cpds	0.382597
[truncated: 3,601 more rows]
