# Supplementary material for: Sequence-based drug design using transformers
Source: bioRxiv preprint, doi:10.1101/2023.11.27.568880, version 1 (2023-11-27)
Supplement: Supplementary Dataset 4 [file 568880_file07.xlsx]

## Sheet: Sheet1
Compound Name	SMILES	QED	cns_guacamol	complexity_rdkit
Benzyl N-[(2S)-3-methyl-1-oxo-1-[[(2R)-1-oxo-3-phenylpropan-2-yl]amino]butan-2-yl]carbamate	CC(C)[C@@H](C(=O)N[C@H](CC1=CC=CC=C1)C=O)NC(=O)OCC2=CC=CC=C2	0.653349	0.907773	1822.87
Calpain Inhibitor III	CC(C)[C@@H](C(=O)N[C@@H](CC1=CC=CC=C1)C=O)NC(=O)OCC2=CC=CC=C2	0.653349	0.907773	1822.87
Brinzolamide	CCN[C@H]1CN(S(=O)(=O)C2=C1C=C(S2)S(=O)(=O)N)CCCOC	0.644109	0.832675	1516.72
Ulixertinib	CC(C)NC1=NC=C(C(=C1)C2=CNC(=C2)C(=O)N[C@H](CO)C3=CC(=CC=C3)Cl)Cl	0.436155	0.721821	1872.26
Odanacatib	CC(C)(C[C@@H](C(=O)NC1(CC1)C#N)N[C@@H](C2=CC=C(C=C2)C3=CC=C(C=C3)S(=O)(=O)C)C(F)(F)F)F	0.465439	0.716832	2345.59
4-(4-(3-(Pyridin-2-yl)-1H-pyrazol-4-yl)pyridin-2-yl)-N-(tetrahydro-2H-pyran-4-yl)benzamide	C1COCCC1NC(=O)C2=CC=C(C=C2)C3=NC=CC(=C3)C4=C(NN=C4)C5=CC=CC=N5	0.501991	0.830676	2273.13
N-((4-(4-Phenylthiazol-2-yl)tetrahydro-2H-pyran-4-yl)methyl)-3-(5-(trifluoromethyl)-1,2,4-oxadiazol-3-yl)benzamide	C1COCCC1(CNC(=O)C2=CC=CC(=C2)C3=NOC(=N3)C(F)(F)F)C4=NC(=CS4)C5=CC=CC=C5	0.372814	0.771399	2295.97
(1-Isobutyl-1H-indol-3-yl)(naphthalen-2-yl)methanone	CC(C)CN1C=C(C2=CC=CC=C21)C(=O)C3=CC4=CC=CC=C4C=C3	0.441864	0.89195	1987.01
Hg-10-102-01	CNC1=NC(=NC=C1Cl)NC2=C(C=C(C=C2)C(=O)N3CCOCC3)OC	0.826519	0.912666	1540.18
Cumyl-thpinaca	CC(C)(C1=CC=CC=C1)NC(=O)C2=NN(C3=CC=CC=C32)CC4CCOCC4	0.727368	0.968182	2046.93
(2R)-N-Hydroxy-1-(4-methoxyphenyl)sulfonyl-4-(4-phenylbenzoyl)piperazine-2-carboxamide	COC1=CC=C(C=C1)S(=O)(=O)N2CCN(C[C@@H]2C(=O)NO)C(=O)C3=CC=C(C=C3)C4=CC=CC=C4	0.400761	0.673277	2395.2
(2S)-N-Hydroxy-1-(4-methoxyphenyl)sulfonyl-4-(4-phenylbenzoyl)piperazine-2-carboxamide	COC1=CC=C(C=C1)S(=O)(=O)N2CCN(C[C@H]2C(=O)NO)C(=O)C3=CC=C(C=C3)C4=CC=CC=C4	0.400761	0.673277	2395.2
Enzalutamide	CC1(C(=O)N(C(=S)N1C2=CC(=C(C=C2)C(=O)NC)F)C3=CC(=C(C=C3)C#N)C(F)(F)F)C	0.549242	0.820458	1777.05
4-[2-(4-Amino-1,2,5-oxadiazol-3-yl)-1-ethyl-7-[(3S)-3-piperidinylmethoxy]-1H-imidazo[4,5-c]pyridin-4-yl]-2-methyl-3-butyn-2-ol	CCN1C2=C(C(=NC=C2OC[C@@H]3CCCNC3)C#CC(C)(C)O)N=C1C4=NON=C4N	0.520257	0.633355	2129.05
StemRegenin 1	CC(C)N1C=NC2=C(N=C(N=C21)C3=CSC4=CC=CC=C43)NCCC5=CC=C(C=C5)O	0.364779	0.785471	2323.17
N~4~-Cyclopropyl-6-(2,3-Dichlorophenyl)pyrimidine-2,4-Diamine	C1CC1NC2=NC(=NC(=C2)C3=C(C(=CC=C3)Cl)Cl)N	0.907634	0.921306	1051.89
Apafant	CC1=NN=C2N1C3=C(C=C(S3)CCC(=O)N4CCOCC4)C(=NC2)C5=CC=CC=C5Cl	0.603775	0.85565	2051.26
2-({5-Chloro-2-[(2-Methoxy-4-Morpholin-4-Ylphenyl)amino]pyrimidin-4-Yl}amino)-N-Methylbenzamide	CNC(=O)C1=CC=CC=C1NC2=NC(=NC=C2Cl)NC3=C(C=C(C=C3)N4CCOCC4)OC	0.480823	0.691208	2158.77
Alisertib	COC1=C(C(=CC=C1)F)C2=NCC3=CN=C(N=C3C4=C2C=C(C=C4)Cl)NC5=CC(=C(C=C5)C(=O)O)OC	0.334716	0.652406	2445.74
2-(5-Chloro-2-((3-(4-methylpiperazin-1-yl)propyl)amino)pyrimidin-4-yl)-N-cyclopropylbenzo[b]thiophene-4-carboxamide	CN1CCN(CC1)CCCNC2=NC=C(C(=N2)C3=CC4=C(C=CC=C4S3)C(=O)NC5CC5)Cl	0.471467	0.744093	2341.44
(1R,2S)-N-[(1,1-Dimethylethoxy)carbonyl]-3-methyl-L-valyl-(4R)-4-[(7-chloro-4-methoxy-1-isoquinolinyl)oxy]-L-prolyl-1-amino-N-(cyclopropylsulfonyl)-2-ethenylcyclopropanecarboxamide	CC(C)(C)[C@@H](C(=O)N1C[C@H](C[C@H]1C(=O)N[C@@]2(C[C@H]2C=C)C(=O)NS(=O)(=O)C3CC3)OC4=NC=C(C5=C4C=C(C=C5)Cl)OC)NC(=O)OC(C)(C)C	0.285739	0.466685	3716.21
Pepstatin	C[C@@H](C(=O)N[C@@H](CC(C)C)[C@H](CC(=O)O)O)NC(=O)C[C@@H]([C@H](CC(C)C)NC(=O)[C@H](C(C)C)NC(=O)[C@H](C(C)C)NC(=O)CC(C)C)O	0.0825137	0.400078	3396.61
Trequinsin	CC1=CC(=C(C(=C1)C)N=C2C=C3C4=CC(=C(C=C4CCN3C(=O)N2C)OC)OC)C	0.669221	0.950026	2256.25
N-(3-((5-Chloro-2-((2-methoxy-4-(4-methylpiperazin-1-yl)phenyl)amino)pyrimidin-4-yl)oxy)phenyl)propionamide	CCC(=O)NC1=CC(=CC=C1)OC2=NC(=NC=C2Cl)NC3=C(C=C(C=C3)N4CCN(CC4)C)OC	0.460295	0.735681	2360.4
Vps34-IN-1	CC(C)(CNC1=NC=C(C(=N1)CC2CC2)C3=NC(=NC=C3)NC4=CC(=NC=C4)Cl)O	0.466596	0.738847	1952.57
Sgc-cbp30	CC1=C(C(=NO1)C)C2=CC3=C(C=C2)N(C(=N3)CCC4=CC(=C(C=C4)OC)Cl)C[C@H](C)N5CCOCC5	0.313976	0.787716	2642.95
Omipalisib	COC1=C(C=C(C=N1)C2=CC3=C(C=CN=C3C=C2)C4=CN=NC=C4)NS(=O)(=O)C5=C(C=C(C=C5)F)F	0.351854	0.757529	2515.34
N-[(2R)-1-Amino-3-methyl-1-oxobutan-2-yl]-1-[(3S)-3-fluoropentyl]indazole-3-carboxamide	CC[C@@H](CCN1C2=CC=CC=C2C(=N1)C(=O)N[C@H](C(C)C)C(=O)N)F	0.767476	0.921306	1678.92
Mardepodect	CN1C=C(C(=N1)C2=CC=C(C=C2)OCC3=NC4=CC=CC=C4C=C3)C5=CC=NC=C5	0.408495	0.965279	2227.17
(2S)-N1-[5-(2-Tert-butyl-4-thiazolyl)-4-methyl-2-thiazolyl]pyrrolidine-1,2-dicarboxamide	CC1=C(SC(=N1)NC(=O)N2CCC[C@H]2C(=O)N)C3=CSC(=N3)C(C)(C)C	0.83468	0.878894	1601.49
[4-[[4-(Ethylamino)-5-(trifluoromethyl)pyrimidin-2-yl]amino]-2-fluoro-5-methoxyphenyl]-morpholin-4-ylmethanone	CCNC1=NC(=NC=C1C(F)(F)F)NC2=C(C=C(C(=C2)F)C(=O)N3CCOCC3)OC	0.662697	0.797421	1744.51
N'-(3-{[5-(2-Cyclopropylpyrimidin-5-Yl)-1h-Pyrrolo[2,3-B]pyridin-3-Yl]carbonyl}-2,4-Difluorophenyl)-N-Ethyl-N-Methylsulfuric Diamide	CCN(C)S(=O)(=O)NC1=C(C(=C(C=C1)F)C(=O)C2=CNC3=C2C=C(C=N3)C4=CN=C(N=C4)C5CC5)F	0.344235	0.64671	2543.69
Apalutamide	CNC(=O)C1=C(C=C(C=C1)N2C(=S)N(C(=O)C23CCC3)C4=CC(=C(N=C4)C#N)C(F)(F)F)F	0.537611	0.805948	1834.53
2-[4-[6-[(3R,5S)-3,5-Dimethylpiperazin-1-yl]-4-methylpyridin-3-yl]phenyl]-7-methyl-3H-pyrrolo[2,3-d]pyrimidin-4-one	C[C@@H]1CN(C[C@@H](N1)C)C2=NC=C(C(=C2)C)C3=CC=C(C=C3)C4=NC5=C(C=CN5C)C(=O)N4	0.522314	0.825458	2462.45
Ensartinib	C[C@@H]1CN(C[C@@H](N1)C)C(=O)C2=CC=C(C=C2)NC(=O)C3=NN=C(C(=C3)O[C@H](C)C4=C(C=CC(=C4Cl)F)Cl)N	0.372542	0.576985	2395.89
N-((1S)-1-(7-Fluoro-2-(2-pyridyl)quinoline-3-yl)ethyl)-9H-purine-6-amine	C[C@@H](C1=C(N=C2C=C(C=CC2=C1)F)C3=CC=CC=N3)NC4=NC=NC5=C4NC=N5	0.479818	0.903585	2084.3
3-[[3-[(Cyclopropylamino)sulfonyl]-7-(2,4-dimethoxy-5-pyrimidinyl)-4-quinolinyl]amino]-5-(3,5-difluo	COC1=NC(=NC=C1C2=CC3=NC=C(C(=C3C=C2)NC4=CC(=CC(=C4)C(=O)O)OC5=CC(=CC(=C5)F)F)S(=O)(=O)NC6CC6)OC	0.161845	0.43693	3214.91
5-[6-(4-Methoxyphenyl)pyrazolo[1,5-a]pyrimidin-3-yl]quinoline	COC1=CC=C(C=C1)C2=CN3C(=C(C=N3)C4=C5C=CC=NC5=CC=C4)N=C2	0.475345	1	2008.98
(S)-5-Fluoro-2-(1-(4-fluorophenyl)ethylamino)-6-(5-methyl-1H-pyrazol-3-ylamino)nicotinonitrile	CC1=CC(=NN1)NC2=C(C=C(C(=N2)N[C@@H](C)C3=CC=C(C=C3)F)C#N)F	0.639479	0.86493	1601.47
(S)-5-(4-(((2-((1-Cyclohexylethyl)amino)-2-oxoethyl)((p-tolyloxy)carbonyl)amino)methyl)phenyl)nicotinic acid	CC1=CC=C(C=C1)OC(=O)N(CC2=CC=C(C=C2)C3=CC(=CN=C3)C(=O)O)CC(=O)N[C@@H](C)C4CCCCC4	0.360418	0.629622	2773.9
(R)-(-)-JQ1 Enantiomer	CC1=C(SC2=C1C(=N[C@@H](C3=NN=C(N32)C)CC(=O)OC(C)(C)C)C4=CC=C(C=C4)Cl)C	0.485544	0.827806	2068.93
5-(2-Amino-8-fluoro-[1,2,4]triazolo[1,5-a]pyridin-6-yl)-N-tert-butylpyridine-3-sulfonamide	CC(C)(C)NS(=O)(=O)C1=CN=CC(=C1)C2=CN3C(=NC(=N3)N)C(=C2)F	0.729118	0.861036	1647.68
(S)-(+)-Tert-Butyl 2-(4-(4-chlorophenyl)-2,3,9-trimethyl-6H-thieno[3,2-f][1,2,4]triazolo[4,3-a][1,4]diazepin-6-yl)acetate	CC1=C(SC2=C1C(=N[C@H](C3=NN=C(N32)C)CC(=O)OC(C)(C)C)C4=CC=C(C=C4)Cl)C	0.485544	0.827806	2068.93
N-[(2R)-1-Amino-3-methyl-1-oxobutan-2-yl]-1-[(3R)-3-fluoropentyl]indazole-3-carboxamide	CC[C@H](CCN1C2=CC=CC=C2C(=N1)C(=O)N[C@H](C(C)C)C(=O)N)F	0.767476	0.921306	1678.92
1-[5-(Cyclopropylsulfamoyl)-2-Thiophen-3-Yl-Phenyl]-3-[3-(Trifluoromethyl)phenyl]urea	C1CC1NS(=O)(=O)C2=CC(=C(C=C2)C3=CSC=C3)NC(=O)NC4=CC=CC(=C4)C(F)(F)F	0.43338	0.665486	2081.54
Zafirlukast	CC1=CC=CC=C1S(=O)(=O)NC(=O)C2=CC(=C(C=C2)CC3=CN(C4=C3C=C(C=C4)NC(=O)OC5CCCC5)C)OC	0.278693	0.617058	3170.33
Tivozanib	CC1=CC(=NO1)NC(=O)NC2=C(C=C(C=C2)OC3=C4C=C(C(=CC4=NC=C3)OC)OC)Cl	0.38787	0.709681	2037.67
Infigratinib	CCN1CCN(CC1)C2=CC=C(C=C2)NC3=CC(=NC=N3)N(C)C(=O)NC4=C(C(=CC(=C4Cl)OC)OC)Cl	0.380779	0.707027	2449.91
(2'-Methyl-4'-(5-methyl-1,2,4-oxadiazol-3-yl)-[1,1'-biphenyl]-4-yl)(1'-methyl-6,7-dihydrospiro[furo[2,3-f]indole-3,4'-piperidin]-5(2H)-yl)methanone	CC1=C(C=CC(=C1)C2=NOC(=N2)C)C3=CC=C(C=C3)C(=O)N4CCC5=CC6=C(C=C54)C7(CCN(CC7)C)CO6	0.351305	0.774676	2946.85
2-[(4S)-6-(4-Chlorophenyl)-8-methoxy-4H-[1,2,4]triazolo[4,3-a][1,4]benzodiazepin-4-yl]-N-ethylacetamide	CCNC(=O)C[C@H]1C2=NN=CN2C3=C(C=C(C=C3)OC)C(=N1)C4=CC=C(C=C4)Cl	0.700221	0.91807	1910.05
[1-[(2S)-3-Methylbutan-2-yl]indol-3-yl]-naphthalen-2-ylmethanone	C[C@@H](C(C)C)N1C=C(C2=CC=CC=C21)C(=O)C3=CC4=CC=CC=C4C=C3	0.402529	0.825822	2088.4
(3~{r})-4-[2-[4-[1-(3-Methoxy-[1,2,4]triazolo[4,3-B]pyridazin-6-Yl)piperidin-4-Yl]phenoxy]ethyl]-1,3-Dimethyl-Piperazin-2-One	C[C@@H]1C(=O)N(CCN1CCOC2=CC=C(C=C2)C3CCN(CC3)C4=NN5C(=NN=C5OC)C=C4)C	0.508952	0.827443	2509.83
3-(1-Naphthoyl)-1-isobutyl-1H-indole	CC(C)CN1C=C(C2=CC=CC=C21)C(=O)C3=CC=CC4=CC=CC=C43	0.441864	0.89195	1978.76
1-(1,2,3,5,6,7-Hexahydro-s-indacen-4-yl)-3-[4-(2-hydroxypropan-2-yl)furan-2-yl]sulfonylurea	CC(C)(C1=COC(=C1)S(=O)(=O)NC(=O)NC2=C3CCCC3=CC4=C2CCC4)O	0.725871	0.781754	1902.61
(E)-N'-(1-(5-Chloro-2-hydroxyphenyl)ethylidene)-3-(morpholinosulfonyl)benzohydrazide.	C/C(=N/NC(=O)C1=CC(=CC=C1)S(=O)(=O)N2CCOCC2)/C3=C(C=CC(=C3)Cl)O	0.550399	0.773441	1860.04
4-Methyl-5-(2-(4-morpholinophenylamino)pyrimidin-4-yl)thiazol-2-amine	CC1=C(SC(=N1)N)C2=NC(=NC=C2)NC3=CC=C(C=C3)N4CCOCC4	0.731333	0.919325	1654.12
(S)-8-Fluoro-N-(1-oxo-1-(pyrrolidin-1-yl)-3-(3-(trifluoromethyl)phenyl)propan-2-yl)-1,2,3,4-tetrahydroisoquinoline-6-sulfonamide	C1CCN(C1)C(=O)[C@H](CC2=CC(=CC=C2)C(F)(F)F)NS(=O)(=O)C3=CC4=C(CNCC4)C(=C3)F	0.599485	0.734694	2264.89
4-[7-[4-Cyano-3-(trifluoromethyl)phenyl]-8-oxo-6-sulfanylidene-5,7-diazaspiro[3.4]octan-5-yl]-2-fluoro-N-methylbenzamide	CNC(=O)C1=C(C=C(C=C1)N2C(=S)N(C(=O)C23CCC3)C4=CC(=C(C=C4)C#N)C(F)(F)F)F	0.532565	0.806908	1883.28
[1-[(2R)-3-Methylbutan-2-yl]indol-3-yl]-naphthalen-2-ylmethanone	C[C@H](C(C)C)N1C=C(C2=CC=CC=C21)C(=O)C3=CC4=CC=CC=C4C=C3	0.402529	0.825822	2088.4
1-(6'-(2-Hydroxy-2-methylpropoxy)-4-((5-methylpyridin-3-yl)oxy)-[3,3'-bipyridin]-6-yl)-3-methylurea	CC1=CC(=CN=C1)OC2=CC(=NC=C2C3=CN=C(C=C3)OCC(C)(C)O)NC(=O)NC	0.531756	0.706629	2017.23
PF-03716556	CC1=C2[C@@H](CCOC2=CC=C1)NC3=CC(=CN4C3=NC(=C4)C)C(=O)N(C)CCO	0.69562	0.890872	2086.17
Serabelisib	C1COCCN1C(=O)C2=CN=C3N2C=C(C=C3)C4=CC5=C(C=C4)OC(=N5)N	0.58611	0.967591	1876.31
N-(5-(1-(2,6-Dichlorophenyl)-3-(difluoromethyl)-1H-pyrazol-5-yl)thiazol-2-yl)isobutyramide	CC(C)C(=O)NC1=NC=C(S1)C2=CC(=NN2C3=C(C=CC=C3Cl)Cl)C(F)F	0.552741	0.816394	1508.55
(S)-1-((5-Chloropyridin-3-yl)methyl)-8-((R)-3-methylmorpholino)-2-(trifluoromethyl)-3,4-dihydro-1H-pyrimido[1,2-a]pyrimidin-6(2H)-one	C[C@@H]1COCCN1C2=CC(=O)N3CC[C@H](N(C3=N2)CC4=CC(=CN=C4)Cl)C(F)(F)F	0.72662	0.875313	1872.65
(1-(2-Morpholin-4-ylethyl)indol-3-yl)-4-methoxynaphthalen-1-ylmethanone	COC1=CC=C(C2=CC=CC=C21)C(=O)C3=CN(C4=CC=CC=C43)CCN5CCOCC5	0.439741	0.932384	2391.07
Adapalene	COC1=C(C=C(C=C1)C2=CC3=C(C=C2)C=C(C=C3)C(=O)O)C45CC6CC(C4)CC(C6)C5	0.519704	0.761485	2321.09
JWH 018 2'-naphthyl-N-(2,2-dimethylpropyl) isomer	CC(C)(C)CN1C=C(C2=CC=CC=C21)C(=O)C3=CC4=CC=CC=C4C=C3	0.414404	0.846031	2062.36
2-[(9S)-7-(4-Chlorophenyl)-4,5,13-trimethyl-3-thia-1,8,11,12-tetrazatricyclo[8.3.0.02,6]trideca-2(6),4,7,10,12-pentaen-9-yl]-N-[4-[2-[2-[2-[2-[[2-[(3S)-2,6-dioxopiperidin-3-yl]-1,3-dioxoisoindol-4-yl]amino]ethoxy]ethoxy]ethoxy]ethoxy]phenyl]acetamide	CC1=C(SC2=C1C(=N[C@H](C3=NN=C(N32)C)CC(=O)NC4=CC=C(C=C4)OCCOCCOCCOCCNC5=CC=CC6=C5C(=O)N(C6=O)[C@H]7CCC(=O)NC7=O)C8=CC=C(C=C8)Cl)C	0.0667543	0.413726	4843.28
2-[(9S)-7-(4-Chlorophenyl)-4,5,13-trimethyl-3-thia-1,8,11,12-tetrazatricyclo[8.3.0.02,6]trideca-2(6),4,7,10,12-pentaen-9-yl]-N-[4-[2-[2-[2-[2-[[2-[(3R)-2,6-dioxopiperidin-3-yl]-1,3-dioxoisoindol-4-yl]amino]ethoxy]ethoxy]ethoxy]ethoxy]phenyl]acetamide	CC1=C(SC2=C1C(=N[C@H](C3=NN=C(N32)C)CC(=O)NC4=CC=C(C=C4)OCCOCCOCCOCCNC5=CC=CC6=C5C(=O)N(C6=O)[C@@H]7CCC(=O)NC7=O)C8=CC=C(C=C8)Cl)C	0.0667543	0.413726	4843.28
N-[(2S)-1-Amino-3-methyl-1-oxobutan-2-yl]-1-[(3S)-3-fluoropentyl]indazole-3-carboxamide	CC[C@@H](CCN1C2=CC=CC=C2C(=N1)C(=O)N[C@@H](C(C)C)C(=O)N)F	0.767476	0.921306	1678.92
8-Fluoro-N-{(2r)-1-Oxo-1-(Pyrrolidin-1-Yl)-3-[3-(Trifluoromethyl)phenyl]propan-2-Yl}-1,2,3,4-Tetrahydroisoquinoline-6-Sulfonamide	C1CCN(C1)C(=O)[C@@H](CC2=CC(=CC=C2)C(F)(F)F)NS(=O)(=O)C3=CC4=C(CNCC4)C(=C3)F	0.599485	0.734694	2264.89
N-(4-(((4-(4-Methoxyphenyl)tetrahydro-2H-pyran-4-yl)methyl)carbamoyl)phenyl)furan-2-carboxamide	COC1=CC=C(C=C1)C2(CCOCC2)CNC(=O)C3=CC=C(C=C3)NC(=O)C4=CC=CO4	0.586314	0.813844	2149.09
Glyburide	COC1=C(C=C(C=C1)Cl)C(=O)NCCC2=CC=C(C=C2)S(=O)(=O)NC(=O)NC3CCCCC3	0.51918	0.628214	2244.47
Posaconazole	CC[C@@H]([C@H](C)O)N1C(=O)N(C=N1)C2=CC=C(C=C2)N3CCN(CC3)C4=CC=C(C=C4)OC[C@H]5C[C@](OC5)(CN6C=NC=N6)C7=C(C=C(C=C7)F)F	0.199951	0.71507	3884.8
(1-Isopentyl-1H-indol-3-yl)(naphthalen-2-yl)methanone	CC(C)CCN1C=C(C2=CC=CC=C21)C(=O)C3=CC4=CC=CC=C4C=C3	0.403685	0.846031	2089.91
4-[(2s,4r)-1-Acetyl-4-[(4-Chlorophenyl)amino]-2-Methyl-1,2,3,4-Tetrahydroquinolin-6-Yl]benzoic Acid	C[C@H]1C[C@H](C2=C(N1C(=O)C)C=CC(=C2)C3=CC=C(C=C3)C(=O)O)NC4=CC=C(C=C4)Cl	0.527665	0.733901	2097.91
(1-(5-Fluoropentyl)-1H-indol-3-yl)(naphthalen-2-yl)methanone	C1=CC=C2C=C(C=CC2=C1)C(=O)C3=CN(C4=CC=CC=C43)CCCCCF	0.285791	0.834824	2113.35
[4,5-Bis(4-methoxyphenyl)-2-thiazolyl]-(4-methyl-1-piperazinyl)methanone	CN1CCN(CC1)C(=O)C2=NC(=C(S2)C3=CC=C(C=C3)OC)C4=CC=C(C=C4)OC	0.623384	0.914161	1883.2
[4-[4-(4-Methoxyphenyl)phenyl]triazol-1-yl]-[(2S)-2-phenylpiperidin-1-yl]methanone	COC1=CC=C(C=C1)C2=CC=C(C=C2)C3=CN(N=N3)C(=O)N4CCCC[C@H]4C5=CC=CC=C5	0.403032	0.82829	2392.16
5-(5-Chloro-3-pyridyl)-N-((5,6-dimethoxy-2-pyridyl)methyl)-2-(2-pyridyl)pyridine-3-carboxamide	COC1=C(N=C(C=C1)CNC(=O)C2=C(N=CC(=C2)C3=CC(=CN=C3)Cl)C4=CC=CC=N4)OC	0.439921	0.814739	2181.55
Mmp inhibitor II	CC1(CN(C(N(C1)S(=O)(=O)C2=CC=C(C=C2)OC)C(=O)NO)S(=O)(=O)C3=CC=C(C=C3)OC)C	0.416163	0.571985	2154.56
N-(4-((2-Amino-6-methylpyrimidin-4-yl)amino)phenyl)-4-(quinolin-4-ylamino)benzamide	CC1=CC(=NC(=N1)N)NC2=CC=C(C=C2)NC(=O)C3=CC=C(C=C3)NC4=CC=NC5=CC=CC=C54	0.257817	0.566228	2527.96
1-(3-Methylbutyl)-1H-indole-3-yl 1-naphthyl ketone	CC(C)CCN1C=C(C2=CC=CC=C21)C(=O)C3=CC=CC4=CC=CC=C43	0.403685	0.846031	2081.66
Quisinostat	CN1C=C(C2=CC=CC=C21)CNCC3CCN(CC3)C4=NC=C(C=N4)C(=O)NO	0.437756	0.831382	2029.54
Dorzolamide	CCN[C@H]1C[C@@H](S(=O)(=O)C2=C1C=C(S2)S(=O)(=O)N)C	0.847127	0.893767	1251.4
(2,3-Dichlorophenyl)(5-methoxy-2-methyl-3-(2-morpholinoethyl)-1H-indol-1-yl)methanone	CC1=C(C2=C(N1C(=O)C3=C(C(=CC=C3)Cl)Cl)C=CC(=C2)OC)CCN4CCOCC4	0.562319	0.86929	2033.7
2-Methyl-2-(3-methyl-4-((4-(methylamino)-5-(trifluoromethyl)-pyrimidin-2-yl)amino)-1H-pyrazol-1-yl)propanenitrile	CC1=NN(C=C1NC2=NC=C(C(=N2)NC)C(F)(F)F)C(C)(C)C#N	0.889487	0.921073	1303.89
rho Kinase Inhibitor IV	C[C@H]1CN(CCCN1S(=O)(=O)C2=CC=CC3=C2C(=CN=C3)C)C(=O)CN	0.865633	0.964312	1874.37
Pevonedistat	C1CC2=CC=CC=C2[C@H]1NC3=C4C=CN(C4=NC=N3)[C@@H]5C[C@H]([C@H](C5)O)COS(=O)(=O)N	0.53109	0.614626	2309.56
Idasanutlin	CC(C)(C)C[C@H]1[C@]([C@H]([C@@H](N1)C(=O)NC2=C(C=C(C=C2)C(=O)O)OC)C3=C(C(=CC=C3)Cl)F)(C#N)C4=C(C=C(C=C4)Cl)F	0.265382	0.45037	2726.94
(1-(5-Chloropentyl)-1H-indol-3-yl)(naphthalen-1-yl)methanone	C1=CC=C2C(=C1)C=CC=C2C(=O)C3=CN(C4=CC=CC=C43)CCCCCCl	0.206929	0.797966	2105.1
Sonidegib	C[C@@H]1CN(C[C@@H](O1)C)C2=NC=C(C=C2)NC(=O)C3=CC=CC(=C3C)C4=CC=C(C=C4)OC(F)(F)F	0.493387	0.741651	2265.53
Selonsertib	CC1=CC(=C(C=C1N2C=C(N=C2)C3CC3)C(=O)NC4=CC=CC(=N4)C5=NN=CN5C(C)C)F	0.465217	0.848924	2333.68
N-[(2R)-1-Amino-3-methyl-1-oxobutan-2-yl]-1-[(4S)-5-fluoro-4-hydroxypentyl]indazole-3-carboxamide	CC(C)[C@H](C(=O)N)NC(=O)C1=NN(C2=CC=CC=C21)CCC[C@@H](CF)O	0.624262	0.823679	1704.05
(S)-Bicalutamide	C[C@@](CS(=O)(=O)C1=CC=C(C=C1)F)(C(=O)NC2=CC(=C(C=C2)C#N)C(F)(F)F)O	0.560412	0.791321	1648.39
(1-(5-Chloropentyl)-1H-indazol-3-yl)(naphthalen-1-yl)methanone	C1=CC=C2C(=C1)C=CC=C2C(=O)C3=NN(C4=CC=CC=C43)CCCCCCl	0.230882	0.92758	2057.76
(R)-Bicalutamide	C[C@](CS(=O)(=O)C1=CC=C(C=C1)F)(C(=O)NC2=CC(=C(C=C2)C#N)C(F)(F)F)O	0.560412	0.791321	1648.39
JWH 018 N-(2,2-dimethylpropyl) isomer	CC(C)(C)CN1C=C(C2=CC=CC=C21)C(=O)C3=CC=CC4=CC=CC=C43	0.414404	0.846031	2054.11
Encorafenib	C[C@@H](CNC1=NC=CC(=N1)C2=CN(N=C2C3=C(C(=CC(=C3)Cl)NS(=O)(=O)C)F)C(C)C)NC(=O)OC	0.371598	0.516661	2406.48
N'-(5-Chlorobenzofuran-2-carbonyl)-2-(trifluoromethyl)benzenesulfonohydrazide	C1=CC=C(C(=C1)C(F)(F)F)S(=O)(=O)NNC(=O)C2=CC3=C(O2)C=CC(=C3)Cl	0.631827	0.845078	1598.82
Vactosertib	CC1=NC(=CC=C1)C2=C(N=C(N2)CNC3=CC=CC=C3F)C4=CN5C(=NC=N5)C=C4	0.461811	0.882459	2147
[(1S)-1-Cyclohexyloxycarbonyloxyethyl] 2-ethoxy-3-[[4-[2-(1-ethyltetrazol-5-yl)phenyl]phenyl]methyl]benzimidazole-4-carboxylate	CCN1C(=NN=N1)C2=CC=CC=C2C3=CC=C(C=C3)CN4C5=C(C=CC=C5N=C4OCC)C(=O)O[C@H](C)OC(=O)OC6CCCCC6	0.112197	0.512097	3544.44
SIS3 free base	CN1C(=C(C2=C1N=CC=C2)/C=C/C(=O)N3CCC4=CC(=C(C=C4C3)OC)OC)C5=CC=CC=C5	0.405321	0.859325	2556.4
Phosphine-biotin	COC(=O)C1=C(C=C(C=C1)C(=O)NCCCOCCOCCOCCCNC(=O)CCCC[C@H]2[C@@H]3[C@H](CS2)NC(=O)N3)P(C4=CC=CC=C4)C5=CC=CC=C5	0.0461503	0.448628	4048.8
Cerivastatin	CC(C)C1=C(C(=C(C(=N1)C(C)C)COC)C2=CC=C(C=C2)F)/C=C/[C@H](C[C@H](CC(=O)O)O)O	0.442845	0.704858	2221.56
[(1R)-1-Cyclohexyloxycarbonyloxyethyl] 2-ethoxy-3-[[4-[2-(1-ethyltetrazol-5-yl)phenyl]phenyl]methyl]benzimidazole-4-carboxylate	CCN1C(=NN=N1)C2=CC=CC=C2C3=CC=C(C=C3)CN4C5=C(C=CC=C5N=C4OCC)C(=O)O[C@@H](C)OC(=O)OC6CCCCC6	0.112197	0.512097	3544.44
(4-Fluoro-1-naphthalenyl)[1-(5-fluoropentyl)-1H-indol-3-yl]methanone	C1=CC=C2C(=C1)C(=CC=C2F)C(=O)C3=CN(C4=CC=CC=C43)CCCCCF	0.2734	0.810549	2108.97
(1-(4-Fluorobenzyl)-1h-indol-3-yl)(naphthalen-1-yl)methanone	C1=CC=C2C(=C1)C=CC=C2C(=O)C3=CN(C4=CC=CC=C43)CC5=CC=C(C=C5)F	0.340171	0.819022	2240.97
N-[(2R)-1-Amino-3,3-dimethyl-1-oxobutan-2-yl]-1-[(4-hydroxycyclohexyl)methyl]indazole-3-carboxamide	CC(C)(C)[C@H](C(=O)N)NC(=O)C1=NN(C2=CC=CC=C21)CC3CCC(CC3)O	0.731564	0.805641	1950.08
Apitolisib	CC1=C(SC2=C1N=C(N=C2N3CCOCC3)C4=CN=C(N=C4)N)CN5CCN(CC5)C(=O)[C@H](C)O	0.522475	0.603967	2344.1
Ozanimod	CC(C)OC1=C(C=C(C=C1)C2=NC(=NO2)C3=C4CC[C@@H](C4=CC=C3)NCCO)C#N	0.619467	0.852076	2056.06
N-[1,3-Dimethyl-2-Oxo-6-(Piperidin-1-Yl)-2,3-Dihydro-1h-Benzimidazol-5-Yl]-2-Methoxybenzamide	CN1C2=C(C=C(C(=C2)NC(=O)C3=CC=CC=C3OC)N4CCCCC4)N(C1=O)C	0.738251	0.946066	2146.69
5-Chloro-N-(4-methoxy-3-(piperazin-1-yl)phenyl)-3-methylbenzo[b]thiophene-2-sulfonamide	CC1=C(SC2=C1C=C(C=C2)Cl)S(=O)(=O)NC3=CC(=C(C=C3)OC)N4CCNCC4	0.611175	0.783034	2036.75
2-(2-Chloro-4-iodophenylamino)-N-cyclopropylmethoxy-3,4-difluoro-5-bromobenzamide	C1CC1CONC(=O)C2=CC(=C(C(=C2NC3=C(C=C(C=C3)I)Cl)F)F)Br	0.268312	0.667386	1376.85
p-MPPI	COC1=CC=CC=C1N2CCN(CC2)CCN(C3=CC=CC=N3)C(=O)C4=CC=C(C=C4)I	0.420114	0.801967	2207.58
N-[(2R)-1-Amino-3-methyl-1-oxobutan-2-yl]-1-[(4S)-4-fluoropentyl]indazole-3-carboxamide	C[C@@H](CCCN1C2=CC=CC=C2C(=N1)C(=O)N[C@H](C(C)C)C(=O)N)F	0.767476	0.921306	1678.92
6-(3-Phenylpropanamido)-N-(2-(cyclopaminyl)ethyl)hexanamide	C[C@H]1C[C@@H]2[C@H]([C@H]([C@]3(O2)CC[C@H]4[C@@H]5CC=C6CC(=O)CC[C@@]6([C@H]5CC4=C3C)C)C)N(C1)CCNC(=O)CCCCCNC(=O)CCC7=CC=CC=C7	0.176326	0.534005	4315.7
Enobosarm	C[C@](COC1=CC=C(C=C1)C#N)(C(=O)NC2=CC(=C(C=C2)C#N)C(F)(F)F)O	0.816763	0.871831	1522.81
N-[(2S)-1-Amino-3-methyl-1-oxobutan-2-yl]-1-[(3R)-3-fluoropentyl]indazole-3-carboxamide	CC[C@H](CCN1C2=CC=CC=C2C(=N1)C(=O)N[C@@H](C(C)C)C(=O)N)F	0.767476	0.921306	1678.92
JD-5037	CC(C)[C@@H](C(=O)N)N=C(NS(=O)(=O)C1=CC=C(C=C1)Cl)N2C[C@@H](C(=N2)C3=CC=C(C=C3)Cl)C4=CC=CC=C4	0.316931	0.654198	2631.36
4-[2-(2-Chloro-4-fluoroanilino)-5-methyl-4-pyrimidinyl]-N-[(1S)-1-(3-chlorophenyl)-2-hydroxyethyl]-1H-pyrrole-2-carboxamide	CC1=CN=C(N=C1C2=CNC(=C2)C(=O)N[C@H](CO)C3=CC(=CC=C3)Cl)NC4=C(C=C(C=C4)F)Cl	0.271015	0.604391	2182.18
(9S)-12,14-Dimethyl-9-(5-methylfuran-2-yl)-17-phenyl-1,8,12,14-tetrazatetracyclo[8.7.0.02,7.011,16]heptadeca-2,4,6,10,16-pentaene-13,15-dione	CC1=CC=C(O1)[C@@H]2C3=C4C(=C(N3C5=CC=CC=C5N2)C6=CC=CC=C6)C(=O)N(C(=O)N4C)C	0.450176	0.861506	2632.73
8-(3-Chloro-5-(4-(1-methyl-1H-pyrazol-4-yl)phenyl)pyridin-4-yl)-2,8-diazaspiro[4.5]decan-1-one	CN1C=C(C=N1)C2=CC=C(C=C2)C3=CN=CC(=C3N4CCC5(CCNC5=O)CC4)Cl	0.696024	0.893901	2088.4
N-((1S)-1-(Aminocarbonyl)-2,2-dimethylpropyl)-1-pentyl-1H-indole-3-carboxamide	CCCCCN1C=C(C2=CC=CC=C21)C(=O)N[C@H](C(=O)N)C(C)(C)C	0.755319	0.921306	1793.13
Galunisertib	CC1=NC(=CC=C1)C2=NN3CCCC3=C2C4=C5C=C(C=CC5=NC=C4)C(=O)N	0.598564	0.974045	2051.71
[1-[(2S)-2-Methylbutyl]indol-3-yl]-naphthalen-2-ylmethanone	CC[C@H](C)CN1C=C(C2=CC=CC=C21)C(=O)C3=CC4=CC=CC=C4C=C3	0.403685	0.846031	2105.91
(1-Propyl-1H-indol-3-yl)(4-propylnaphthalen-1-yl)methanone	CCCC1=CC=C(C2=CC=CC=C12)C(=O)C3=CN(C4=CC=CC=C43)CCC	0.367394	0.809724	2205.46
Pexidartinib	C1=CC(=NC=C1CC2=CNC3=C2C=C(C=N3)Cl)NCC4=CN=C(C=C4)C(F)(F)F	0.466458	0.841882	1864.29
5-(1h-Pyrrolo[2,3-B]pyridin-3-Ylmethyl)-N-[4-(Trifluoromethyl)benzyl]pyridin-2-Amine	C1=CC2=C(NC=C2CC3=CN=C(C=C3)NCC4=CC=C(C=C4)C(F)(F)F)N=C1	0.500085	0.904656	1878.25
[1-[(2R)-2-Methylbutyl]indol-3-yl]-naphthalen-2-ylmethanone	CC[C@@H](C)CN1C=C(C2=CC=CC=C21)C(=O)C3=CC4=CC=CC=C4C=C3	0.403685	0.846031	2105.91
(2S)-2-[4-Chloro-6-[(4-naphthalen-2-yl-1,3-thiazol-2-yl)amino]pyrimidin-2-yl]sulfanyloctanoic acid	CCCCCC[C@@H](C(=O)O)SC1=NC(=CC(=N1)Cl)NC2=NC(=CS2)C3=CC4=CC=CC=C4C=C3	0.0921634	0.534746	2375.81
Nvp-baw2881	C1=CC(=CC(=C1)NC(=O)C2=CC=CC3=C2C=CC(=C3)OC4=NC(=NC=C4)N)C(F)(F)F	0.465512	0.826324	1977.63
[(3R)-1-({4-[2-(4-Methoxyphenyl)ethynyl]phenyl}carbonyl)piperidin-3-yl]methanol	COC1=CC=C(C=C1)C#CC2=CC=C(C=C2)C(=O)N3CCC[C@H](C3)CO	0.867047	0.976499	1733.02
Copanlisib	COC1=C(C=CC2=C3NCCN3C(=NC(=O)C4=CN=C(N=C4)N)N=C21)OCCCN5CCOCC5	0.463727	0.5924	2422.92
N-[(2R)-1-Amino-3-methyl-1-oxobutan-2-yl]-1-[(4R)-4-fluoropentyl]indazole-3-carboxamide	C[C@H](CCCN1C2=CC=CC=C2C(=N1)C(=O)N[C@H](C(C)C)C(=O)N)F	0.767476	0.921306	1678.92
(2R)-2-[4-Chloro-6-[(4-naphthalen-2-yl-1,3-thiazol-2-yl)amino]pyrimidin-2-yl]sulfanyloctanoic acid	CCCCCC[C@H](C(=O)O)SC1=NC(=CC(=N1)Cl)NC2=NC(=CS2)C3=CC4=CC=CC=C4C=C3	0.0921634	0.534746	2375.81
Mivebresib	CCS(=O)(=O)NC1=CC(=C(C=C1)OC2=C(C=C(C=C2)F)F)C3=CN(C(=O)C4=C3C=CN4)C	0.447968	0.770781	2309.12
(1-(6-Fluorohexyl)-1H-indol-3-yl)(naphthalen-1-yl)methanone	C1=CC=C2C(=C1)C=CC=C2C(=O)C3=CN(C4=CC=CC=C43)CCCCCCF	0.253292	0.788079	2208.78
Tanomastat	C1=CC=C(C=C1)SC[C@@H](CC(=O)C2=CC=C(C=C2)C3=CC=C(C=C3)Cl)C(=O)O	0.361235	0.828493	1779.34
(9R)-12,14-Dimethyl-9-(5-methylfuran-2-yl)-17-phenyl-1,8,12,14-tetrazatetracyclo[8.7.0.02,7.011,16]heptadeca-2,4,6,10,16-pentaene-13,15-dione	CC1=CC=C(O1)[C@H]2C3=C4C(=C(N3C5=CC=CC=C5N2)C6=CC=CC=C6)C(=O)N(C(=O)N4C)C	0.450176	0.861506	2632.73
JWH 073 6-methoxyindole analog	CCCCN1C=C(C2=C1C=C(C=C2)OC)C(=O)C3=CC=CC4=CC=CC=C43	0.406297	0.922895	2116.08
Azd-4547	C[C@@H]1CN(C[C@@H](N1)C)C2=CC=C(C=C2)C(=O)NC3=NNC(=C3)CCC4=CC(=CC(=C4)OC)OC	0.472414	0.709744	2379.6
JWH 081-N-(cyclohexylmethyl) analog	COC1=CC=C(C2=CC=CC=C21)C(=O)C3=CN(C4=CC=CC=C43)CC5CCCCC5	0.354634	0.800487	2412.81
N-[(2S)-1-Amino-3-methyl-1-oxobutan-2-yl]-1-[(4S)-5-fluoro-4-hydroxypentyl]indazole-3-carboxamide	CC(C)[C@@H](C(=O)N)NC(=O)C1=NN(C2=CC=CC=C21)CCC[C@@H](CF)O	0.624262	0.823679	1704.05
Gsk1016790A	CC(C)C[C@@H](C(=O)N1CCN(CC1)C(=O)[C@H](CO)NS(=O)(=O)C2=C(C=C(C=C2)Cl)Cl)NC(=O)C3=CC4=CC=CC=C4S3	0.306747	0.526283	2919.09
Celecoxib	CC1=CC=C(C=C1)C2=CC(=NN2C3=CC=C(C=C3)S(=O)(=O)N)C(F)(F)F	0.754105	0.964198	1610.82
N-[(2S)-1-Amino-3,3-dimethyl-1-oxobutan-2-yl]-1-[(4-hydroxycyclohexyl)methyl]indazole-3-carboxamide	CC(C)(C)[C@@H](C(=O)N)NC(=O)C1=NN(C2=CC=CC=C21)CC3CCC(CC3)O	0.731564	0.805641	1950.08
8-[2beta-(2alpha-Pentylcyclopropane-1alpha-ylmethyl)cyclopropane-1beta-yl]octanoic acid	CCCCC[C@@H]1C[C@@H]1C[C@H]2C[C@H]2CCCCCCCC(=O)O	0.396866	0.890621	1670.06
Unii-8XZ4J0KS9C	CN1N=C(N=N1)C2=CC3=C(C=C2)C4=C(N3)N=C(N=C4NC5CCC(CC5)N)CC6=CC=CC=C6	0.371592	0.632571	2609.72
[(3R)-3-Aminopiperidin-1-yl]-[2-(1-ethylindol-2-yl)-3-methylbenzimidazol-5-yl]methanone	CCN1C2=CC=CC=C2C=C1C3=NC4=C(N3C)C=C(C=C4)C(=O)N5CCC[C@H](C5)N	0.568007	0.933925	2387.67
N-[(2R)-1-Amino-3-methyl-1-oxobutan-2-yl]-1-[(4R)-5-fluoro-4-hydroxypentyl]indazole-3-carboxamide	CC(C)[C@H](C(=O)N)NC(=O)C1=NN(C2=CC=CC=C21)CCC[C@H](CF)O	0.624262	0.823679	1704.05
2-(2-Chloro-4-iodophenylamino)-N-(cyclopropylmethoxy)-3,4-difluorobenzamide	C1CC1CONC(=O)C2=C(C(=C(C=C2)F)F)NC3=C(C=C(C=C3)I)Cl	0.451904	0.749456	1371.65
5-Carboxyfluorescein N-succinimidyl ester	C1CC(=O)N(C1=O)OC(=O)C2=CC3=C(C=C2)C4(C5=C(C=C(C=C5)O)OC6=C4C=CC(=C6)O)OC3=O	0.42466	0.605628	2076.38
Ledipasvir	CC(C)[C@@H](C(=O)N1CC2(CC2)C[C@H]1C3=NC=C(N3)C4=CC5=C(C=C4)C6=C(C5(F)F)C=C(C=C6)C7=CC8=C(C=C7)N=C(N8)[C@@H]9[C@H]1CC[C@H](C1)N9C(=O)[C@H](C(C)C)NC(=O)OC)NC(=O)OC	0.107881	0.231103	5255.49
[4-[4-(4-Methoxyphenyl)phenyl]triazol-1-yl]-[(2R)-2-phenylpiperidin-1-yl]methanone	COC1=CC=C(C=C1)C2=CC=C(C=C2)C3=CN(N=N3)C(=O)N4CCCC[C@@H]4C5=CC=CC=C5	0.403032	0.82829	2392.16
Methyl palmitelaidate	CCCCCC/C=C/CCCCCCCC(=O)OC	0.253246	0.941544	1339.96
(9-(5-Fluoropentyl)-9H-carbazol-3-yl)(naphthalen-1-yl)methanone	C1=CC=C2C(=C1)C=CC=C2C(=O)C3=CC4=C(C=C3)N(C5=CC=CC=C54)CCCCCF	0.203852	0.689304	2544.22
Mmpip	CN1C(=CC2=C(C1=O)C(=NO2)C3=CC=NC=C3)C4=CC=C(C=C4)OC	0.575374	1	1716.92
Cysmethynil	CCCCCCCCN1C=C(C2=C1C=CC(=C2)C3=CC=CC(=C3)C)CC(=O)N	0.433087	0.889736	2241.1
1-N'-[4-[2-(Cyclopropanecarbonylamino)pyridin-4-yl]oxy-2,6-difluorophenyl]-1-N-(4-fluorophenyl)cyclopropane-1,1-dicarboxamide	C1CC1C(=O)NC2=NC=CC(=C2)OC3=CC(=C(C(=C3)F)NC(=O)C4(CC4)C(=O)NC5=CC=C(C=C5)F)F	0.369865	0.635741	2300.9
1-(5-Fluoropentyl)-N-naphthalen-2-ylindole-3-carboxamide	C1=CC=C2C=C(C=CC2=C1)NC(=O)C3=CN(C4=CC=CC=C43)CCCCCF	0.384729	0.860981	2171.69
N-Hydroxy-1-(4-methoxybenzyl)-1H-indole-6-carboxamide	COC1=CC=C(C=C1)CN2C=CC3=C2C=C(C=C3)C(=O)NO	0.574595	0.921306	1452.32
N-(4-(2-Amino-3-chloropyridin-4-yloxy)-3-fluorophenyl)-4-ethoxy-1-(4-fluorophenyl)-2-oxo-1,2-dihydropyridine-3-carboxamide	CCOC1=C(C(=O)N(C=C1)C2=CC=C(C=C2)F)C(=O)NC3=CC(=C(C=C3)OC4=C(C(=NC=C4)N)Cl)F	0.352615	0.690992	2304.71
7-[(2R)-2-[(E,3R)-3-[3-(4-Chloro-2-methylphenyl)phenyl]-3-hydroxyprop-1-enyl]-5-oxopyrrolidin-1-yl]heptanoic acid	CC1=C(C=CC(=C1)Cl)C2=CC(=CC=C2)[C@@H](/C=C/[C@H]3CCC(=O)N3CCCCCCC(=O)O)O	0.315497	0.688198	2360.61
Lonafarnib	C1CN(CCC1CC(=O)N2CCC(CC2)[C@@H]3C4=C(CCC5=C3N=CC(=C5)Br)C=C(C=C4Br)Cl)C(=O)N	0.454301	0.708709	2464.28
2-[(2S)-Butan-2-yl]-4-[4-[4-[4-[[(2R,4S)-2-(2,4-dichlorophenyl)-2-(1,2,4-triazol-1-ylmethyl)-1,3-dioxolan-4-yl]methoxy]phenyl]piperazin-1-yl]phenyl]-1,2,4-triazol-3-one	CC[C@H](C)N1C(=O)N(C=N1)C2=CC=C(C=C2)N3CCN(CC3)C4=CC=C(C=C4)OC[C@H]5CO[C@](O5)(CN6C=NC=N6)C7=C(C=C(C=C7)Cl)Cl	0.174394	0.746676	3656.31
Isoquinolin-6-yl1-(5-fluoropentyl)-1H-indole-3-carboxylate	C1=CC=C2C(=C1)C(=CN2CCCCCF)C(=O)OC3=CC4=C(C=C3)C=NC=C4	0.241309	0.964708	2088.34
2-[(2r)-Butan-2-Yl]-4-{4-[4-(4-{[(2r,4s)-2-(2,4-Dichlorophenyl)-2-(1h-1,2,4-Triazol-1-Ylmethyl)-1,3-Dioxolan-4-Yl]methoxy}phenyl)piperazin-1-Yl]phenyl}-2,4-Dihydro-3h-1,2,4-Triazol-3-One	CC[C@@H](C)N1C(=O)N(C=N1)C2=CC=C(C=C2)N3CCN(CC3)C4=CC=C(C=C4)OC[C@H]5CO[C@](O5)(CN6C=NC=N6)C7=C(C=C(C=C7)Cl)Cl	0.174394	0.746676	3656.31
1,3-Bis[(3,4,5-Trihydroxybenzoyl)Oxy]Naphthalene	C1=CC=C2C(=C1)C=C(C=C2OC(=O)C3=CC(=C(C(=C3)O)O)O)OC(=O)C4=CC(=C(C(=C4)O)O)O	0.148937	0.450235	2031.97
Linifanib	CC1=CC(=C(C=C1)F)NC(=O)NC2=CC=C(C=C2)C3=C4C(=CC=C3)NN=C4N	0.409856	0.81684	1932.32
[(3S,4R)-3-Amino-4-hydroxypiperidin-1-yl]-[2-[1-(cyclopropylmethyl)indol-2-yl]-7-methoxy-1-methylbenzimidazol-5-yl]methanone	CN1C2=C(C=C(C=C2OC)C(=O)N3CC[C@H]([C@H](C3)N)O)N=C1C4=CC5=CC=CC=C5N4CC6CC6	0.464051	0.746702	2741.55
Alpelisib	CC1=C(SC(=N1)NC(=O)N2CCC[C@H]2C(=O)N)C3=CC(=NC=C3)C(C)(C)C(F)(F)F	0.752828	0.78736	1753.89
4-Bromanyl-~{n}-(6-Methoxy-1,3-Dimethyl-2-Oxidanylidene-Benzimidazol-5-Yl)-2-Methyl-Benzenesulfonamide	CC1=C(C=CC(=C1)Br)S(=O)(=O)NC2=CC3=C(C=C2OC)N(C(=O)N3C)C	0.676704	0.85814	1853.26
Bosutinib	CN1CCN(CC1)CCCOC2=C(C=C3C(=C2)N=CC(=C3NC4=CC(=C(C=C4Cl)Cl)OC)C#N)OC	0.378829	0.776443	2439.96
Bmx-IN-1	CC1=C(C=C(C=C1)N2C(=O)C=CC3=CN=C4C=CC(=CC4=C32)C5=CC=C(C=C5)NS(=O)(=O)C)NC(=O)C=C	0.239689	0.685515	3023.07
2-Methoxy-N-[(2E)-3-[4-[[3-methyl-4-[(6-methyl-3-pyridinyl)oxy]phenyl]amino]-6-quinazolinyl]-2-propen-1-yl]acetamide	CC1=NC=C(C=C1)OC2=C(C=C(C=C2)NC3=NC=NC4=C3C=C(C=C4)/C=C/CNC(=O)COC)C	0.357714	0.751642	2536.03
Afuresertib	CN1C(=C(C=N1)Cl)C2=C(SC(=C2)C(=O)N[C@@H](CC3=CC(=CC=C3)F)CN)Cl	0.627055	0.82786	1632.37
VEGF receptor tyrosine kinase inhibitor III	CCCNC(=O)NC1=C(C=C(C=C1)OC2=NC=NC3=CC(=C(C=C32)OC)OC)Cl	0.582974	0.846607	1819.14
(4-Ethylnaphthalen-1-yl)-[1-[(4R)-4-hydroxypentyl]indol-3-yl]methanone	CCC1=CC=C(C2=CC=CC=C12)C(=O)C3=CN(C4=CC=CC=C43)CCC[C@@H](C)O	0.411693	0.910312	2336.44
Nvs-cecr2-1	CCCS(=O)(=O)C1=NC(=CC(=N1)NC2CC2)C3=CC4=C(C=C3)N(C=C4)C5CC(NC(C5)(C)C)(C)C	0.430354	0.725705	2775.29
BAY-61-3606 free base	COC1=C(C=C(C=C1)C2=CC3=NC=CN3C(=N2)NC4=C(C=CC=N4)C(=O)N)OC	0.519677	0.831964	1942.58
[2-[(1-Hydroxy-2,2,6,6-tetramethylpiperidin-4-yl)amino]-2-oxoethyl]-triphenylphosphanium	CC1(CC(CC(N1O)(C)C)NC(=O)C[P+](C2=CC=CC=C2)(C3=CC=CC=C3)C4=CC=CC=C4)C	0.516183	0.752572	2332.39
Momelotinib	C1COCCN1C2=CC=C(C=C2)NC3=NC=CC(=N3)C4=CC=C(C=C4)C(=O)NCC#N	0.597823	0.83539	2021.03
7-[(2R)-2-[(E,3S)-3-[3-(4-Chloro-2-methylphenyl)phenyl]-3-hydroxyprop-1-enyl]-5-oxopyrrolidin-1-yl]heptanoic acid	CC1=C(C=CC(=C1)Cl)C2=CC(=CC=C2)[C@H](/C=C/[C@H]3CCC(=O)N3CCCCCCC(=O)O)O	0.315497	0.688198	2360.61
(4R)-6-Amino-4-(2,5-dimethoxyphenyl)-3-naphthalen-2-yl-2,4-dihydropyrano[2,3-c]pyrazole-5-carbonitrile	COC1=CC(=C(C=C1)OC)[C@@H]2C(=C(OC3=NNC(=C23)C4=CC5=CC=CC=C5C=C4)N)C#N	0.500797	0.80654	2291.14
2-Chloro-4-[[(1R,2S)-1-[5-(4-cyanophenyl)-1,3,4-oxadiazol-2-yl]-2-hydroxypropyl]amino]-3-methylbenzonitrile	CC1=C(C=CC(=C1Cl)C#N)N[C@@H](C2=NN=C(O2)C3=CC=C(C=C3)C#N)[C@H](C)O	0.672345	0.818224	1717.38
3-[(E)-[(3As,4R,5R,6aR)-4-[(E,3S)-3-cyclohexyl-3-hydroxyprop-1-enyl]-5-hydroxy-3,3a,4,5,6,6a-hexahydro-1H-pentalen-2-ylidene]methyl]benzoic acid	C1CCC(CC1)[C@@H](/C=C/[C@H]2[C@@H](C[C@@H]3[C@@H]2C/C(=C/C4=CC(=CC=C4)C(=O)O)/C3)O)O	0.632061	0.8311	2117.52
2-(2,4-Dichlorophenylamino)-N-((tetrahydro-2H-pyran-4-yl)methyl)-4-(trifluoromethyl)pyrimidine-5-carboxamide	C1COCCC1CNC(=O)C2=CN=C(N=C2C(F)(F)F)NC3=C(C=C(C=C3)Cl)Cl	0.692341	0.787444	1558.61
4-[6-(4-Propan-2-yloxyphenyl)pyrazolo[1,5-a]pyrimidin-3-yl]quinoline	CC(C)OC1=CC=C(C=C1)C2=CN3C(=C(C=N3)C4=CC=NC5=CC=CC=C45)N=C2	0.418903	0.973432	2199.31
Dutasteride	C[C@]12CC[C@H]3[C@H]([C@@H]1CC[C@@H]2C(=O)NC4=C(C=CC(=C4)C(F)(F)F)C(F)(F)F)CC[C@@H]5[C@@]3(C=CC(=O)N5)C	0.426542	0.582935	2436.63
Cep-37440	CNC(=O)C1=CC=CC=C1NC2=NC(=NC=C2Cl)NC3=C(C4=C(C[C@H](CCC4)N5CCN(CC5)CCO)C=C3)OC	0.280658	0.569106	2959.53
Spebrutinib	COCCOC1=CC=C(C=C1)NC2=NC=C(C(=N2)NC3=CC(=CC=C3)NC(=O)C=C)F	0.33122	0.77328	1979.98
Oprozomib	CC1=NC=C(S1)C(=O)N[C@@H](COC)C(=O)N[C@@H](COC)C(=O)N[C@@H](CC2=CC=CC=C2)C(=O)[C@]3(CO3)C	0.296512	0.498485	2390.62
CID 54577153	COC1=CC=CC(=C1)N2C(=O)C3=C(C=C(N3C4=CC=C(C=C4)C5=C(C(=CC=C5)OC)O)Cl)NC2=O	0.378203	0.732659	2584.39
4-[(3-Chloro-4-{[(2r)-3,3,3-Trifluoro-2-Hydroxy-2-Methylpropanoyl]amino}phenyl)sulfonyl]-N,N-Dimethylbenzamide	C[C@@](C(=O)NC1=C(C=C(C=C1)S(=O)(=O)C2=CC=C(C=C2)C(=O)N(C)C)Cl)(C(F)(F)F)O	0.686866	0.729378	1745.4
5-(5-Chloro-2,4-dihydroxyphenyl)-N-ethyl-4-(4-methoxyphenyl)-1H-pyrazole-3-carboxamide	CCNC(=O)C1=C(C(=NN1)C2=CC(=C(C=C2O)O)Cl)C3=CC=C(C=C3)OC	0.535022	0.775487	1660.1
[(3S)-3-Aminopiperidin-1-yl]-[2-(1-ethylindol-2-yl)-3-methylbenzimidazol-5-yl]methanone	CCN1C2=CC=CC=C2C=C1C3=NC4=C(N3C)C=C(C=C4)C(=O)N5CCC[C@@H](C5)N	0.568007	0.933925	2387.67
5-(4-Chlorophenyl)-N-(3,5-dimethoxyphenyl)furan-2-carboxamide	COC1=CC(=CC(=C1)NC(=O)C2=CC=C(O2)C3=CC=C(C=C3)Cl)OC	0.707284	0.976499	1492.45
N-[(2R)-1-Amino-3,3-dimethyl-1-oxobutan-2-yl]-1-(cyclohexylmethyl)indazole-3-carboxamide	CC(C)(C)[C@H](C(=O)N)NC(=O)C1=NN(C2=CC=CC=C21)CC3CCCCC3	0.846388	0.918269	1924.37
[1-[(4S)-4-Fluoropentyl]indol-3-yl]-(4-methylnaphthalen-1-yl)methanone	CC1=CC=C(C2=CC=CC=C12)C(=O)C3=CN(C4=CC=CC=C43)CCC[C@H](C)F	0.354929	0.796095	2211.52
(3R)-3-[[1-(Cyclohexylmethyl)indazole-3-carbonyl]amino]-2,2-dimethylbutanedioic acid	CC(C)([C@H](C(=O)O)NC(=O)C1=NN(C2=CC=CC=C21)CC3CCCCC3)C(=O)O	0.655767	0.737614	1941.96
N-Acetyl-S-trans,trans-farnesyl-L-cysteine	CC(=CCC/C(=C/CC/C(=C/CSC[C@@H](C(=O)O)NC(=O)C)/C)/C)C	0.386521	0.919727	1653.66
(4S)-6-Amino-4-(2,5-dimethoxyphenyl)-3-naphthalen-2-yl-2,4-dihydropyrano[2,3-c]pyrazole-5-carbonitrile	COC1=CC(=C(C=C1)OC)[C@H]2C(=C(OC3=NNC(=C23)C4=CC5=CC=CC=C5C=C4)N)C#N	0.500797	0.80654	2291.14
(1-(5-Fluoropentyl)-1H-indazol-3-yl)(naphthalen-1-yl)methanone	C1=CC=C2C(=C1)C=CC=C2C(=O)C3=NN(C4=CC=CC=C43)CCCCCF	0.319357	0.964518	2057.76
4-(2-(5,6,7,8-Tetrahydro-5,5,8,8-tetramethyl-2-naphthalenyl)ethynyl)benzoic acid	CC1(CCC(C2=C1C=CC(=C2)C#CC3=CC=C(C=C3)C(=O)O)(C)C)C	0.734775	0.972908	1738.44
[1-[(4R)-4-Fluoropentyl]indol-3-yl]-(4-methylnaphthalen-1-yl)methanone	CC1=CC=C(C2=CC=CC=C12)C(=O)C3=CN(C4=CC=CC=C43)CCC[C@@H](C)F	0.354929	0.796095	2211.52
(4S)-4-(4-Bromophenyl)-1-[(4-fluorophenyl)methyl]-5-(3-imidazol-1-ylpropyl)-3-phenyl-4H-pyrrolo[3,4-c]pyrazol-6-one	C1=CC=C(C=C1)C2=NN(C3=C2[C@@H](N(C3=O)CCCN4C=CN=C4)C5=CC=C(C=C5)Br)CC6=CC=C(C=C6)F	0.219168	0.682794	2774.99
4-((2-(((1R,2R)-2-Hydroxycyclohexyl)amino)benzo[d]thiazol-6-yl)oxy)-N-methylpicolinamide	CNC(=O)C1=NC=CC(=C1)OC2=CC3=C(C=C2)N=C(S3)N[C@@H]4CCCC[C@H]4O	0.608126	0.823281	1902.79
1-[(1R)-1-(1-Ethylsulfonyl-4-piperidinyl)ethyl]-N-[(4-methoxy-6-methyl-2-oxo-1H-pyridin-3-yl)methyl]-2-methyl-3-indolecarboxamide	CCS(=O)(=O)N1CCC(CC1)[C@@H](C)N2C(=C(C3=CC=CC=C32)C(=O)NCC4=C(C=C(NC4=O)C)OC)C	0.464594	0.67231	2930.8
(4R)-4-(4-Bromophenyl)-1-[(4-fluorophenyl)methyl]-5-(3-imidazol-1-ylpropyl)-3-phenyl-4H-pyrrolo[3,4-c]pyrazol-6-one	C1=CC=C(C=C1)C2=NN(C3=C2[C@H](N(C3=O)CCCN4C=CN=C4)C5=CC=C(C=C5)Br)CC6=CC=C(C=C6)F	0.219168	0.682794	2774.99
CPI 169 S-enantiomer	CCS(=O)(=O)N1CCC(CC1)[C@H](C)N2C(=C(C3=CC=CC=C32)C(=O)NCC4=C(C=C(NC4=O)C)OC)C	0.464594	0.67231	2930.8
[1-[(2S)-3-Methylbutan-2-yl]indol-3-yl]-naphthalen-1-ylmethanone	C[C@@H](C(C)C)N1C=C(C2=CC=CC=C21)C(=O)C3=CC=CC4=CC=CC=C43	0.402529	0.825822	2080.15
4-[(3R)-3-(4-Methoxyphenyl)-5-phenyl-3,4-dihydropyrazol-2-yl]benzenesulfonamide	COC1=CC=C(C=C1)[C@H]2CC(=NN2C3=CC=C(C=C3)S(=O)(=O)N)C4=CC=CC=C4	0.698856	0.922705	2033.3
4-{[(7r)-8-Cyclopentyl-7-Ethyl-5-Methyl-6-Oxo-5,6,7,8-Tetrahydropteridin-2-Yl]amino}-3-Methoxy-N-(1-Methylpiperidin-4-Yl)benzamide	CC[C@@H]1C(=O)N(C2=CN=C(N=C2N1C3CCCC3)NC4=C(C=C(C=C4)C(=O)NC5CCN(CC5)C)OC)C	0.570339	0.70887	2730.18
(4-((5,6-Diphenylpyrazin-2-yl)(isopropyl)amino)butoxy)acetic acid	CC(C)N(CCCCOCC(=O)O)C1=CN=C(C(=N1)C2=CC=CC=C2)C3=CC=CC=C3	0.445339	0.898766	2147.02
4-[(3S)-3-(4-Methoxyphenyl)-5-phenyl-3,4-dihydropyrazol-2-yl]benzenesulfonamide	COC1=CC=C(C=C1)[C@@H]2CC(=NN2C3=CC=C(C=C3)S(=O)(=O)N)C4=CC=CC=C4	0.698856	0.922705	2033.3
(4-Ethylnaphthalen-1-yl)[1-(5-fluoropentyl)-1H-indol-3-yl]methanone	CCC1=CC=C(C2=CC=CC=C12)C(=O)C3=CN(C4=CC=CC=C43)CCCCCF	0.242672	0.75842	2315.81
4-(p-Tolylthio)thieno[2,3-c]pyridine-2-carboxamide	CC1=CC=C(C=C1)SC2=C3C=C(SC3=CN=C2)C(=O)N	0.798904	0.976499	1241.24
Propanoic acid, 2-((4-(2-((((2,4-difluorophenyl)amino)carbonyl)heptylamino)ethyl)phenyl)thio)-2-methyl-	CCCCCCCN(CCC1=CC=C(C=C1)SC(C)(C)C(=O)O)C(=O)NC2=C(C=C(C=C2)F)F	0.234057	0.567574	2254.95
N-Acetyl-S-[(2E,6E)-3,7,11-trimethyldodeca-2,6,10-trienyl]-D-cysteine	CC(=CCC/C(=C/CC/C(=C/CSC[C@H](C(=O)O)NC(=O)C)/C)/C)C	0.386521	0.919727	1653.66
7-(3,5-Dimethylisoxazol-4-yl)-8-methoxy-1-((R)-1-(pyridin-2-yl)ethyl)-1H-imidazo[4,5-c]quinolin-2(3H)-one	CC1=C(C(=NO1)C)C2=C(C=C3C(=C2)N=CC4=C3N(C(=O)N4)[C@H](C)C5=CC=CC=N5)OC	0.473136	0.898502	2334.45
(4-Chloronaphthalen-1-yl)-[1-(5-fluoropentyl)indol-3-yl]methanone	C1=CC=C2C(=C1)C(=CC=C2Cl)C(=O)C3=CN(C4=CC=CC=C43)CCCCCF	0.249225	0.742171	2110.97
JWH 019 N-(6-hydroxyhexyl) metabolite	C1=CC=C2C(=C1)C=CC=C2C(=O)C3=CN(C4=CC=CC=C43)CCCCCCO	0.324522	0.942085	2230.84
[1-[(2R)-3-Methylbutan-2-yl]indol-3-yl]-naphthalen-1-ylmethanone	C[C@H](C(C)C)N1C=C(C2=CC=CC=C21)C(=O)C3=CC=CC4=CC=CC=C43	0.402529	0.825822	2080.15
N-[(2R)-1-Amino-3,3-dimethyl-1-oxobutan-2-yl]-2-(5-fluoropentyl)-5-(4-fluorophenyl)pyrazole-3-carboxamide	CC(C)(C)[C@H](C(=O)N)NC(=O)C1=CC(=NN1CCCCCF)C2=CC=C(C=C2)F	0.625106	0.869467	1864.36
5-[4-Phenyl-5-(trifluoromethyl)-2-thienyl]-3-[3-(trifluoromethyl)phenyl]-1,2,4-oxadiazole	C1=CC=C(C=C1)C2=C(SC(=C2)C3=NC(=NO3)C4=CC(=CC=C4)C(F)(F)F)C(F)(F)F	0.31717	0.700261	1670.06
(3S)-3-[[1-(Cyclohexylmethyl)indazole-3-carbonyl]amino]-2,2-dimethylbutanedioic acid	CC(C)([C@@H](C(=O)O)NC(=O)C1=NN(C2=CC=CC=C21)CC3CCCCC3)C(=O)O	0.655767	0.737614	1941.96
(R)-4-((3-Chloro-2-fluorophenyl)amino)-7-methoxyquinazolin-6-yl 2,4-dimethylpiperazine-1-carboxylate	C[C@@H]1CN(CCN1C(=O)OC2=C(C=C3C(=C2)C(=NC=N3)NC4=C(C(=CC=C4)Cl)F)OC)C	0.622301	0.826496	2066.9
Tretinoin	CC1=C(C(CCC1)(C)C)/C=C/C(=C/C=C/C(=C/C(=O)O)/C)/C	0.529573	0.941478	1530.65
5-Fluoro-MN-18	C1=CC=C2C(=C1)C=CC=C2NC(=O)C3=NN(C4=CC=CC=C43)CCCCCF	0.428595	0.93886	2115.17
N-[(2S)-1-Amino-3,3-dimethyl-1-oxobutan-2-yl]-2-(5-fluoropentyl)-5-(4-fluorophenyl)pyrazole-3-carboxamide	CC(C)(C)[C@@H](C(=O)N)NC(=O)C1=CC(=NN1CCCCCF)C2=CC=C(C=C2)F	0.625106	0.869467	1864.36
Dapt	C[C@@H](C(=O)N[C@@H](C1=CC=CC=C1)C(=O)OC(C)(C)C)NC(=O)CC2=CC(=CC(=C2)F)F	0.658383	0.817749	1902.14
Fubimina	C1=CC=C2C(=C1)C=CC=C2C(=O)C3=NC4=CC=CC=C4N3CCCCCF	0.319357	0.964518	2057.76
Lexibulin	CCC[C@@H](C1=CN=CC=C1)NC2=NC(=NC=C2C)C3=CC(=C(C=C3)NC(=O)NCC)OC	0.440456	0.744229	2253.62
Ibrutinib	C=CC(=O)N1CCC[C@H](C1)N2C3=NC=NC(=C3C(=N2)C4=CC=C(C=C4)OC5=CC=CC=C5)N	0.466703	0.848689	2371.45
N-[(2R)-1-Amino-3,3-dimethyl-1-oxobutan-2-yl]-1-(5-fluoropentyl)indazole-3-carboxamide	CC(C)(C)[C@H](C(=O)N)NC(=O)C1=NN(C2=CC=CC=C21)CCCCCF	0.707662	0.92114	1751.86
1-[(3As,4R,9bS)-4-(6-bromo-1,3-benzodioxol-5-yl)-3a,4,5,9b-tetrahydro-3H-cyclopenta[c]quinolin-8-yl]ethanone	CC(=O)C1=CC2=C(C=C1)N[C@H]([C@@H]3[C@@H]2C=CC3)C4=CC5=C(C=C4Br)OCO5	0.543809	0.909084	1742.23
Methyl 7-[(1R,2R,3R,5S)-2-[(3R)-5-(2-fluorophenyl)-3-hydroxypent-4-ynyl]-3,5-dihydroxycyclopentyl]heptanoate	COC(=O)CCCCCC[C@H]1[C@H](C[C@H]([C@@H]1CC[C@H](C#CC2=CC=CC=C2F)O)O)O	0.307446	0.785183	2015.71
Unii-RS5M62YJ87	CC(C)[C@@H](C(=O)N)NC(=O)C1=CC(=NN1CCCCCF)C2=CC=C(C=C2)F	0.609072	0.894094	1790.31
(2S)-2-[[1-(4-Hydroxycyclohexylmethyl)-1H-indazole-3-ylcarbonyl]amino]-3-methylbutanamide	CC(C)[C@@H](C(=O)N)NC(=O)C1=NN(C2=CC=CC=C21)CC3CCC(CC3)O	0.71823	0.819949	1875.5
Ravuconazole	C[C@@H](C1=NC(=CS1)C2=CC=C(C=C2)C#N)[C@](CN3C=NC=N3)(C4=C(C=C(C=C4)F)F)O	0.487452	0.86339	1970.95
1-(5-Fluoropentyl)-1H-indole-3-carboxylic acid 7-isoquinolinyl ester	C1=CC=C2C(=C1)C(=CN2CCCCCF)C(=O)OC3=CC4=C(C=C3)C=CN=C4	0.241309	0.964708	2088.34
5-(2-Propoxyphenyl)-7H-[1,2,3]triazolo[4,5-d]pyrimidin-7-one	CCCOC1=CC=CC=C1C2=NC(=O)C3=NN=NC3=N2	0.836085	1	1120.07
3-(1H-Indol-5-yl)-5-(4-((4-methylpiperazin-1-yl)methyl)phenyl)-1H-pyrrolo[2,3-b]pyridine	CN1CCN(CC1)CC2=CC=C(C=C2)C3=CC4=C(NC=C4C5=CC6=C(C=C5)NC=C6)N=C3	0.423181	0.837912	2598.64
Ssw3KY7sww	COC1=CC(=C(C=C1CCNCC2=CC=CC=C2F)OC)Br	0.751449	0.953241	1330.21
N-[(2S)-1-Amino-3-methyl-1-oxobutan-2-yl]-1-[(4S)-4-fluoropentyl]indazole-3-carboxamide	C[C@@H](CCCN1C2=CC=CC=C2C(=N1)C(=O)N[C@@H](C(C)C)C(=O)N)F	0.767476	0.921306	1678.92
Methyl 7-[(1R,2R,3R,5R)-2-[(3S)-5-(2-fluorophenyl)-3-hydroxypent-4-ynyl]-3,5-dihydroxycyclopentyl]heptanoate	COC(=O)CCCCCC[C@H]1[C@@H](C[C@H]([C@@H]1CC[C@@H](C#CC2=CC=CC=C2F)O)O)O	0.307446	0.785183	2015.71
(2S)-7-Chloro-2-methyl-3-(2-methylphenyl)-4-oxo-1,2-dihydroquinazoline-6-sulfonamide	C[C@H]1NC2=CC(=C(C=C2C(=O)N1C3=CC=CC=C3C)S(=O)(=O)N)Cl	0.855302	0.919667	1560.82
N-[4-(4-Aminophenyl)sulfanylphenyl]-4-[(4-methoxyphenyl)sulfonylamino]butanamide	COC1=CC=C(C=C1)S(=O)(=O)NCCCC(=O)NC2=CC=C(C=C2)SC3=CC=C(C=C3)N	0.302953	0.658674	2181.78
1-Cyclopentyl-N-((4,6-dimethyl-2-oxo-1,2-dihydropyridin-3-yl)methyl)-6-(4-(morpholinomethyl)phenyl)-1H-indazole-4-carboxamide	CC1=CC(=C(C(=O)N1)CNC(=O)C2=C3C=NN(C3=CC(=C2)C4=CC=C(C=C4)CN5CCOCC5)C6CCCC6)C	0.349122	0.723002	3177.85
Ivosidenib	C1CC(=O)N([C@@H]1C(=O)N(C2=CC(=CN=C2)F)[C@@H](C3=CC=CC=C3Cl)C(=O)NC4CC(C4)(F)F)C5=NC=CC(=C5)C#N	0.442987	0.700876	2592.34
1-[(3Ar,4R,9bS)-4-(6-bromo-1,3-benzodioxol-5-yl)-3a,4,5,9b-tetrahydro-3H-cyclopenta[c]quinolin-8-yl]ethanone	CC(=O)C1=CC2=C(C=C1)N[C@H]([C@H]3[C@@H]2C=CC3)C4=CC5=C(C=C4Br)OCO5	0.543809	0.909084	1742.23
N-[(1-Methylpiperidin-4-yl)methyl]-3-[3-(trifluoromethoxy)phenyl]imidazo[1,2-b]pyridazin-6-amine	CN1CCC(CC1)CNC2=NN3C(=NC=C3C4=CC(=CC=C4)OC(F)(F)F)C=C2	0.694214	0.926666	1899.13
(2R)-7-Chloro-2-methyl-3-(2-methylphenyl)-4-oxo-1,2-dihydroquinazoline-6-sulfonamide	C[C@@H]1NC2=CC(=C(C=C2C(=O)N1C3=CC=CC=C3C)S(=O)(=O)N)Cl	0.855302	0.919667	1560.82
Baricitinib	CCS(=O)(=O)N1CC(C1)(CC#N)N2C=C(C=N2)C3=C4C=CNC4=NC=N3	0.716703	0.891948	1822.78
Pictilisib	CS(=O)(=O)N1CCN(CC1)CC2=CC3=C(S2)C(=NC(=N3)C4=C5C=NNC5=CC=C4)N6CCOCC6	0.432645	0.752579	2624.39
(2S)-2-Amino-3-[4-[2-amino-6-[(1S)-2,2,2-trifluoro-1-[4-(3-fluorophenyl)phenyl]ethoxy]pyrimidin-4-yl]phenyl]propanoic acid	C1=CC(=CC(=C1)F)C2=CC=C(C=C2)[C@@H](C(F)(F)F)OC3=NC(=NC(=C3)C4=CC=C(C=C4)C[C@@H](C(=O)O)N)N	0.270719	0.570196	2375.02
Roflumilast	C1CC1COC2=C(C=CC(=C2)C(=O)NC3=C(C=NC=C3Cl)Cl)OC(F)F	0.704638	0.930715	1385.2
JWH 018 N-(5-bromopentyl) analog	C1=CC=C2C(=C1)C=CC=C2C(=O)C3=CN(C4=CC=CC=C43)CCCCCBr	0.187811	0.710433	2105.1
Methyl 7-[(1R,2R,3R,5S)-2-[(3S)-5-(2-fluorophenyl)-3-hydroxypent-4-ynyl]-3,5-dihydroxycyclopentyl]heptanoate	COC(=O)CCCCCC[C@H]1[C@H](C[C@H]([C@@H]1CC[C@@H](C#CC2=CC=CC=C2F)O)O)O	0.307446	0.785183	2015.71
1-[(3Ar,4R,9bR)-4-(6-bromo-1,3-benzodioxol-5-yl)-3a,4,5,9b-tetrahydro-3H-cyclopenta[c]quinolin-8-yl]ethanone	CC(=O)C1=CC2=C(C=C1)N[C@H]([C@H]3[C@H]2C=CC3)C4=CC5=C(C=C4Br)OCO5	0.543809	0.909084	1742.23
2-Chloro-N-((2'-(N-cyanosulfamoyl)-[1,1'-biphenyl]-4-yl)methyl)-N-(4-methylbenzyl)benzamide	CC1=CC=C(C=C1)CN(CC2=CC=C(C=C2)C3=CC=CC=C3S(=O)(=O)NC#N)C(=O)C4=CC=CC=C4Cl	0.226531	0.711398	2668.58
u-73343	C[C@]12CC[C@H]3[C@H]([C@@H]1CC[C@@H]2NCCCCCCN4C(=O)CCC4=O)CCC5=C3C=CC(=C5)OC	0.400459	0.81295	2643.31
Methyl 7-[(1R,2R,3S,5R)-2-[(3S)-5-(2-fluorophenyl)-3-hydroxypent-4-ynyl]-3,5-dihydroxycyclopentyl]heptanoate	COC(=O)CCCCCC[C@H]1[C@@H](C[C@@H]([C@@H]1CC[C@@H](C#CC2=CC=CC=C2F)O)O)O	0.307446	0.785183	2015.71
NBD-FTY720 phenoxy (hydrochloride)	C1=CC(=CC=C1CCC(CO)(CO)N)OCCCCCCNC2=CC=C(C3=NON=C23)[N+](=O)[O-]	0.146132	0.46627	2293.02
4-[[[2,3-Dihydro-6-[(2-methylpropyl)[(4-methyl-2-thiazolyl)sulfonyl]amino]-1H-indene-5yl]oxy]methyl]benzoic acid	CC1=CSC(=N1)S(=O)(=O)N(CC(C)C)C2=C(C=C3CCCC3=C2)OCC4=CC=C(C=C4)C(=O)O	0.440679	0.783776	2429.57
[1-[(4R)-4-Hydroxypentyl]indol-3-yl]-(4-methoxyphenyl)methanone	C[C@H](CCCN1C=C(C2=CC=CC=C21)C(=O)C3=CC=C(C=C3)OC)O	0.662026	0.976499	1793.91
(1-Butyl-1H-indol-3-yl)(4-methoxynaphthalen-1-yl)methanone	CCCCN1C=C(C2=CC=CC=C21)C(=O)C3=CC=C(C4=CC=CC=C43)OC	0.406297	0.922895	2124.33
(E)-3-(3,5-Difluoro-4-((1R,3R)-2-(2-fluoro-2-methylpropyl)-3-methyl-2,3,4,9-tetrahydro-1H-pyrido[3,4-b]indol-1-yl)phenyl)acrylic acid	C[C@@H]1CC2=C([C@H](N1CC(C)(C)F)C3=C(C=C(C=C3F)/C=C/C(=O)O)F)NC4=CC=CC=C24	0.503903	0.763258	2219.55
N-[(2R)-1-Amino-3,3-dimethyl-1-oxobutan-2-yl]-1-pentylindole-3-carboxamide	CCCCCN1C=C(C2=CC=CC=C21)C(=O)N[C@@H](C(=O)N)C(C)(C)C	0.755319	0.921306	1793.13
Rigosertib	COC1=C(C=C(C=C1)CS(=O)(=O)/C=C/C2=C(C=C(C=C2OC)OC)OC)NCC(=O)O	0.531139	0.703561	1975.64
Adavosertib	CC(C)(C1=NC(=CC=C1)N2C3=NC(=NC=C3C(=O)N2CC=C)NC4=CC=C(C=C4)N5CCN(CC5)C)O	0.373518	0.712553	2786.96
Methyl 7-[(1R,2R,3S,5S)-2-[(3S)-5-(2-fluorophenyl)-3-hydroxypent-4-ynyl]-3,5-dihydroxycyclopentyl]heptanoate	COC(=O)CCCCCC[C@H]1[C@H](C[C@@H]([C@@H]1CC[C@@H](C#CC2=CC=CC=C2F)O)O)O	0.307446	0.785183	2015.71
Ritanserin	CC1=C(C(=O)N2C=CSC2=N1)CCN3CCC(=C(C4=CC=C(C=C4)F)C5=CC=C(C=C5)F)CC3	0.381901	0.805873	2419.43
2-Methyl-1-(2-methyl-3-(trifluoromethyl)benzyl)-6-morpholino-1H-benzo[d]imidazole-4-carboxylic acid	CC1=C(C=CC=C1C(F)(F)F)CN2C(=NC3=C(C=C(C=C32)N4CCOCC4)C(=O)O)C	0.666261	0.871078	2012.62
5-Bromo THJ 018	C1=CC=C2C(=C1)C=CC=C2C(=O)C3=NN(C4=CC=CC=C43)CCCCCBr	0.20889	0.83522	2057.76
Naxaprostene	C1CCC(CC1)[C@@H](/C=C/[C@H]2[C@@H](C[C@H]3[C@@H]2C/C(=C/C4=CC(=CC=C4)C(=O)O)/C3)O)O	0.632061	0.8311	2117.52
Fdu-nnei	C1=CC=C2C(=C1)C=CC=C2NC(=O)C3=CN(C4=CC=CC=C43)CC5=CC=C(C=C5)F	0.384915	0.830775	2300.01
JWH 018 2'-naphthyl-N-(1-ethylpropyl) isomer	CCC(CC)N1C=C(C2=CC=CC=C21)C(=O)C3=CC4=CC=CC=C4C=C3	0.385648	0.809872	2077.91
2,6-Dimethylphenyl (2,4-dimethoxyphenyl)(2-((4-(4-methylpiperazin-1-yl)phenyl)amino)pyrimidin-4-yl)carbamate	CC1=C(C(=CC=C1)C)OC(=O)N(C2=C(C=C(C=C2)OC)OC)C3=NC(=NC=C3)NC4=CC=C(C=C4)N5CCN(CC5)C	0.277088	0.704586	2995.89
Methyl (S)-2-(9-(cyclohexylmethyl)-9H-carbazole-3-carboxamido)-3,3-dimethylbutanoate	CC(C)(C)[C@@H](C(=O)OC)NC(=O)C1=CC2=C(C=C1)N(C3=CC=CC=C32)CC4CCCCC4	0.524707	0.826251	2475.55
[(1S)-6'-Methoxy-3-oxospiro[2-benzofuran-1,9'-xanthene]-3'-yl] 2-(pyridin-2-yldisulfanyl)benzoate	COC1=CC2=C(C=C1)[C@]3(C4=C(O2)C=C(C=C4)OC(=O)C5=CC=CC=C5SSC6=CC=CC=N6)C7=CC=CC=C7C(=O)O3	0.112147	0.605676	2949.34
[(1R)-6'-Methoxy-3-oxospiro[2-benzofuran-1,9'-xanthene]-3'-yl] 2-(pyridin-2-yldisulfanyl)benzoate	COC1=CC2=C(C=C1)[C@@]3(C4=C(O2)C=C(C=C4)OC(=O)C5=CC=CC=C5SSC6=CC=CC=N6)C7=CC=CC=C7C(=O)O3	0.112147	0.605676	2949.34
Crizotinib	C[C@H](C1=C(C=CC(=C1Cl)F)Cl)OC2=C(N=CC(=C2)C3=CN(N=C3)C4CCNCC4)N	0.533055	0.785536	1916.3
Enasidenib	CC(C)(CNC1=NC(=NC(=N1)C2=NC(=CC=C2)C(F)(F)F)NC3=CC(=NC=C3)C(F)(F)F)O	0.45527	0.663025	1791.28
5-(5-Chloro-2,4-Dihydroxyphenyl)-N-Ethyl-4-(4-Methoxyphenyl)isoxazole-3-Carboxamide	CCNC(=O)C1=NOC(=C1C2=CC=C(C=C2)OC)C3=CC(=C(C=C3O)O)Cl	0.613111	0.820185	1609.48
8-[(1S,2R)-2-{(1R,2R)-2-Pentylcyclopropylmethyl}-cyclopropyl]octanoic acid	CCCCC[C@@H]1C[C@@H]1C[C@H]2C[C@@H]2CCCCCCCC(=O)O	0.396866	0.890621	1670.06
1-(4-(6-Bromobenzo[1,3]dioxol-5-yl)-3a,4,5,9b-tetrahydro-3H-cyclopenta[c]quinolin-8-yl)-ethanone	CC(=O)C1=CC2=C(C=C1)N[C@H]([C@@H]3[C@H]2C=CC3)C4=CC5=C(C=C4Br)OCO5	0.543809	0.909084	1742.23
Dacinostat	C1=CC=C2C(=C1)C(=CN2)CCN(CCO)CC3=CC=C(C=C3)/C=C/C(=O)NO	0.261488	0.81682	1997.7
Ripasudil	C[C@H]1CNCCCN1S(=O)(=O)C2=CC=CC3=CN=CC(=C32)F	0.914439	0.976499	1529.34
Apatinib	C1CCC(C1)(C#N)C2=CC=C(C=C2)NC(=O)C3=C(N=CC=C3)NCC4=CC=NC=C4	0.630342	0.885798	2050.61
Temsavir	CC1=NN(C=N1)C2=NC=C(C3=C2NC=C3C(=O)C(=O)N4CCN(CC4)C(=O)C5=CC=CC=C5)OC	0.344798	0.706071	2397.02
(4-Ethylnaphthalen-1-yl)-[1-[(4S)-4-hydroxypentyl]indol-3-yl]methanone	CCC1=CC=C(C2=CC=CC=C12)C(=O)C3=CN(C4=CC=CC=C43)CCC[C@H](C)O	0.411693	0.910312	2336.44
4-Chloro-N-[(1S,2S)-2-[[(1R)-1-naphthalen-1-ylethyl]amino]cyclohexyl]benzamide	C[C@H](C1=CC=CC2=CC=CC=C21)N[C@H]3CCCC[C@@H]3NC(=O)C4=CC=C(C=C4)Cl	0.55462	0.803741	2170.82
Miransertib	C1CC(C1)(C2=CC=C(C=C2)N3C4=C(C=CC(=N4)C5=CC=CC=C5)N=C3C6=C(N=CC=C6)N)N	0.413339	0.813637	2508.86
(R)-3-((4-(5-(3-Cyano-4-isopropoxyphenyl)-1,2,4-oxadiazol-3-yl)-2,3-dihydro-1H-inden-1-yl)amino)propanoic acid	CC(C)OC1=C(C=C(C=C1)C2=NC(=NO2)C3=C4CC[C@H](C4=CC=C3)NCCC(=O)O)C#N	0.545275	0.733897	2161.16
5'-O-Tritylinosine	C1=CC=C(C=C1)C(C2=CC=CC=C2)(C3=CC=CC=C3)OC[C@@H]4[C@H]([C@H]([C@@H](O4)N5C=NC6=C5N=CNC6=O)O)O	0.287885	0.584779	2659.91
N-[(2-Fluorophenyl)methyl]-2-(4-iodo-2,5-dimethoxyphenyl)ethan-1-amine	COC1=CC(=C(C=C1CCNCC2=CC=CC=C2F)OC)I	0.551837	0.886018	1330.21
4-{2-Amino-6-[(1r)-2,2,2-Trifluoro-1-(3'-Fluorobiphenyl-4-Yl)ethoxy]pyrimidin-4-Yl}-L-Phenylalanine	C1=CC(=CC(=C1)F)C2=CC=C(C=C2)[C@H](C(F)(F)F)OC3=NC(=NC(=C3)C4=CC=C(C=C4)C[C@@H](C(=O)O)N)N	0.270719	0.570196	2375.02
1-Tert-butyl-3-(naphthalen-1-ylmethyl)-1H-pyrazolo[3,4-d]pyrimidin-4-amine	CC(C)(C)N1C2=NC=NC(=C2C(=N1)CC3=CC=CC4=CC=CC=C43)N	0.604472	0.976499	1857.53
C21H32Fno4	CCCCOC[C@H]1CCCC[C@H]1COCCNC(=O)OC2=CC=CC=C2F	0.571312	0.964076	1798.52
1-(4-(8-Amino-3-(tert-butyl)imidazo[1,5-a]pyrazin-1-yl)naphthalen-1-yl)-3-(3-(trifluoromethyl)phenyl)urea	CC(C)(C)C1=NC(=C2N1C=CN=C2N)C3=CC=C(C4=CC=CC=C43)NC(=O)NC5=CC=CC(=C5)C(F)(F)F	0.237478	0.487549	2728.95
1-Tert-butyl-3-[2-(3-methoxyphenoxy)-5-nitrophenyl]sulfonylurea	CC(C)(C)NC(=O)NS(=O)(=O)C1=C(C=CC(=C1)[N+](=O)[O-])OC2=CC=CC(=C2)OC	0.537552	0.694671	1802.34
4-((R)-2-((R)-2,2,2-Trifluoro-1-hydroxyethyl)pyrrolidin-1-yl)-2-(trifluoromethyl)benzonitrile	C1C[C@@H](N(C1)C2=CC(=C(C=C2)C#N)C(F)(F)F)[C@H](C(F)(F)F)O	0.840256	0.976499	1103.41
(8S,10S,13S,14S,17S)-17-[2-[4-(2,6-Dipyrrolidin-1-ylpyrimidin-4-yl)piperazin-1-yl]acetyl]-10,13-dimethyl-6,7,8,12,14,15,16,17-octahydrocyclopenta[a]phenanthren-3-one	C[C@]12CC=C3[C@H]([C@@H]1CC[C@@H]2C(=O)CN4CCN(CC4)C5=NC(=NC(=C5)N6CCCC6)N7CCCC7)CCC8=CC(=O)C=C[C@@]83C	0.406774	0.795575	3606.34
10-[4-(1-Methylpyridin-1-ium-4-yl)pyridin-1-ium-1-yl]decyl-triphenylphosphanium	C[N+]1=CC=C(C=C1)C2=CC=[N+](C=C2)CCCCCCCCCC[P+](C3=CC=CC=C3)(C4=CC=CC=C4)C5=CC=CC=C5	0.0693024	0.462058	3434.11
[(1R)-1-(3,4-Dichlorophenyl)-1,3,4,9-tetrahydropyrido[3,4-b]indol-2-yl]-(4-methoxyphenyl)methanone	COC1=CC=C(C=C1)C(=O)N2CCC3=C([C@H]2C4=CC(=C(C=C4)Cl)Cl)NC5=CC=CC=C35	0.399089	0.728406	2177.59
N-(1-Amino-3,3-dimethyl-1-oxobutan-2-yl)-1-(cyclohexylmethyl)-1H-indole-3-carboxamide	CC(C)(C)[C@@H](C(=O)N)NC(=O)C1=NN(C2=CC=CC=C21)CC3CCCCC3	0.846388	0.918269	1924.37
[1-[(2S)-2-Methylbutyl]indol-3-yl]-naphthalen-1-ylmethanone	CC[C@H](C)CN1C=C(C2=CC=CC=C21)C(=O)C3=CC=CC4=CC=CC=C43	0.403685	0.846031	2097.66
[1-[(4R)-4-Fluoropentyl]indol-3-yl]-naphthalen-1-ylmethanone	C[C@H](CCCN1C=C(C2=CC=CC=C21)C(=O)C3=CC=CC4=CC=CC=C43)F	0.377696	0.835013	2105.1
N-[2-[[6-(2,6-Dichloro-3,5-dimethoxyphenyl)quinazolin-2-yl]amino]-3-methylphenyl]prop-2-enamide	CC1=C(C(=CC=C1)NC(=O)C=C)NC2=NC=C3C=C(C=CC3=N2)C4=C(C(=CC(=C4Cl)OC)OC)Cl	0.26679	0.570089	2337.27
Colchicine	CC(=O)N[C@H]1CCC2=CC(=C(C(=C2C3=CC=C(C(=O)C=C13)OC)OC)OC)OC	0.832522	0.937634	1927.7
(1S)-5-Hydroxy-9,9-dimethyl-15-phenyl-8-oxa-13,15,17-triazatetracyclo[8.7.0.02,7.013,17]heptadeca-2(7),3,5,10-tetraene-14,16-dione	CC1(C2=CCN3C(=O)N(C(=O)N3[C@@H]2C4=C(O1)C=C(C=C4)O)C5=CC=CC=C5)C	0.659773	0.968264	2028.24
N-(4-(2-Chlorophenyl)-6,7-dimethyl-3-quinolyl)-N'-(2,4-difluorophenyl)urea	CC1=CC2=C(C(=CN=C2C=C1C)NC(=O)NC3=C(C=C(C=C3)F)F)C4=CC=CC=C4Cl	0.359033	0.629765	2048.33
N-[(2S)-1-Amino-3-methyl-1-oxobutan-2-yl]-1-[(4R)-5-fluoro-4-hydroxypentyl]indazole-3-carboxamide	CC(C)[C@@H](C(=O)N)NC(=O)C1=NN(C2=CC=CC=C21)CCC[C@H](CF)O	0.624262	0.823679	1704.05
(R)-4,4,4-Trifluoro-1-((3S,8S,9S,10R,13S,14S,17S)-3-hydroxy-10,13-dimethyl-2,3,4,7,8,9,10,11,12,13,14,15,16,17-tetradecahydro-1H-cyclopenta[a]phenanthren-17-yl)-3-(trifluoromethyl)butane-1,3-diol	C[C@]12CC[C@H]3[C@H]([C@@H]1CC[C@@H]2[C@@H](CC(C(F)(F)F)(C(F)(F)F)O)O)CC=C4[C@@]3(CC[C@@H](C4)O)C	0.36459	0.661662	2104.54
(1-(5-Fluoropentyl)-3-(naphthalen-1-oyl)-6-nitroindole)	C1=CC=C2C(=C1)C=CC=C2C(=O)C3=CN(C4=C3C=CC(=C4)[N+](=O)[O-])CCCCCF	0.15483	0.864426	2218.75
Gilteritinib	CCC1=C(N=C(C(=N1)C(=O)N)NC2=CC(=C(C=C2)N3CCC(CC3)N4CCN(CC4)C)OC)NC5CCOCC5	0.42815	0.5829	2887.72
4'-Carbamoyl-[1,1'-biphenyl]-4-yl methyl(3-(pyridin-4-yl)benzyl)carbamate	CN(CC1=CC(=CC=C1)C2=CC=NC=C2)C(=O)OC3=CC=C(C=C3)C4=CC=C(C=C4)C(=O)N	0.452263	0.861245	2279.9
[(1S)-1-(3,4-Dichlorophenyl)-1,3,4,9-tetrahydropyrido[3,4-b]indol-2-yl]-(4-methoxyphenyl)methanone	COC1=CC=C(C=C1)C(=O)N2CCC3=C([C@@H]2C4=CC(=C(C=C4)Cl)Cl)NC5=CC=CC=C35	0.399089	0.728406	2177.59
3-[[(1S)-4-[5-(3-Cyano-4-propan-2-yloxyphenyl)-1,2,4-oxadiazol-3-yl]-2,3-dihydro-1H-inden-1-yl]amino]propanoic acid	CC(C)OC1=C(C=C(C=C1)C2=NC(=NO2)C3=C4CC[C@@H](C4=CC=C3)NCCC(=O)O)C#N	0.545275	0.733897	2161.16
(S)-3-(4-Methoxyphenyl)-N-((S)-1-((R)-2-methyloxiran-2-yl)-1-oxo-3-phenylpropan-2-yl)-2-((S)-2-(2-morpholinoacetamido)propanamido)propanamide	C[C@@H](C(=O)N[C@@H](CC1=CC=C(C=C1)OC)C(=O)N[C@@H](CC2=CC=CC=C2)C(=O)[C@]3(CO3)C)NC(=O)CN4CCOCC4	0.277053	0.519007	2913.93
CID 73442743	CC1=CC(=C(C(=O)N1)CNC(=O)C2=C(N(C3=CC=CC=C32)[C@H](C)C4CCOCC4)C)OC	0.613029	0.808076	2429.08
N-[(2S)-1-Amino-3-methyl-1-oxobutan-2-yl]-1-(cyclohexylmethyl)-5-(4-fluorophenyl)pyrazole-3-carboxamide	CC(C)[C@@H](C(=O)N)NC(=O)C1=NN(C(=C1)C2=CC=C(C=C2)F)CC3CCCCC3	0.745181	0.880564	1965.41
2-Ethoxy-1-[[2'-(1H-tetrazol-5-yl)-4-biphenylyl]methyl]-1H-benzimidazole-7-carboxylic acid (1S)-1-(cyclohexyloxycarbonyloxy)ethyl ester	CCOC1=NC2=CC=CC(=C2N1CC3=CC=C(C=C3)C4=CC=CC=C4C5=NNN=N5)C(=O)O[C@H](C)OC(=O)OC6CCCCC6	0.14091	0.50149	3328.41
Schembl21178650	C1=CC=C2C(=C1)C=NC=C2OC(=O)C3=CN(C4=CC=CC=C43)CCCCCF	0.313765	0.964708	2088.34
N-[2,3-Dihydro-1,3-dimethyl-2-oxo-6-(1-pyrrolidinyl)-1H-benzimidazol-5-yl]-2-methoxybenzamide	CN1C2=C(C=C(C(=C2)NC(=O)C3=CC=CC=C3OC)N4CCCC4)N(C1=O)C	0.755724	0.965216	2047.15
Treprostinil	CCCCC[C@@H](CC[C@H]1[C@@H](C[C@H]2[C@@H]1CC3=C(C2)C(=CC=C3)OCC(=O)O)O)O	0.531666	0.84066	1995.8
N-[(2R)-1-Amino-4-hydroxy-3,3-dimethyl-1-oxobutan-2-yl]-1-[(4-hydroxycyclohexyl)methyl]indazole-3-carboxamide	CC(C)(CO)[C@H](C(=O)N)NC(=O)C1=NN(C2=CC=CC=C21)CC3CCC(CC3)O	0.552559	0.663214	1998.89
N-[(2S)-1-Amino-3-methyl-1-oxobutan-2-yl]-1-[(4R)-4-fluoropentyl]indazole-3-carboxamide	C[C@H](CCCN1C2=CC=CC=C2C(=N1)C(=O)N[C@@H](C(C)C)C(=O)N)F	0.767476	0.921306	1678.92
[1-[(2R)-2-Methylbutyl]indol-3-yl]-naphthalen-1-ylmethanone	CC[C@@H](C)CN1C=C(C2=CC=CC=C21)C(=O)C3=CC=CC4=CC=CC=C43	0.403685	0.846031	2097.66
Boldenone Cypionate	C[C@]12CC[C@H]3[C@H]([C@@H]1CC[C@@H]2OC(=O)CCC4CCCC4)CCC5=CC(=O)C=C[C@]35C	0.520063	0.840261	2322.93
Otenabant	CCNC1(CCN(CC1)C2=NC=NC3=C2N=C(N3C4=CC=C(C=C4)Cl)C5=CC=CC=C5Cl)C(=O)N	0.402878	0.714659	2404.69
ThioFluor 623	CC1(C(=C(C(=C(C#N)C#N)O1)C#N)/C=C/C2=CC=C(C=C2)N(CCOCCOCCOC)S(=O)(=O)C3=C(C=C(C=C3)[N+](=O)[O-])[N+](=O)[O-])C	0.10425	0.600003	3179.97
(s)-2-(4-(4-Chlorophenyl)-2,3,9-trimethyl-6h-thieno[3,2-f][1,2,4]triazolo[4,3-a][1,4]diazepin-6-yl)acetamide	CC1=C(SC2=C1C(=N[C@H](C3=NN=C(N32)C)CC(=O)N)C4=CC=C(C=C4)Cl)C	0.728393	0.936812	1741.53
5-Fluoro-MN-24	C1=CC=C2C(=C1)C=CC=C2NC(=O)C3=CN(C4=CC=CC=C43)CCCCCF	0.384729	0.860981	2163.44
Talazoparib	CN1C(=NC=N1)[C@@H]2[C@H](NC3=CC(=CC4=C3C2=NNC4=O)F)C5=CC=C(C=C5)F	0.558167	0.910119	1899.63
2-[[(3As,3bR,7S,9aR,9bS,11aS)-9a,11a-dimethyl-2,3,3a,3b,4,6,7,8,9,9b,10,11-dodecahydronaphtho[2,1-e][1]benzofuran-7-yl]oxy]-N,N-diethylethanamine	CCN(CC)CCO[C@H]1CC[C@@]2([C@H]3CC[C@]4([C@H]([C@@H]3CC=C2C1)CCO4)C)C	0.606093	0.924644	2096.21
Fmoc-L-leucine	CC(C)C[C@@H](C(=O)O)NC(=O)OCC1C2=CC=CC=C2C3=CC=CC=C13	0.822187	0.921306	1668.74
(S)-(5-(2-Fluorophenyl)-2-methylthiazol-4-yl)(2-((5-phenyl-1,3,4-oxadiazol-2-yl)methyl)pyrrolidin-1-yl)methanone	CC1=NC(=C(S1)C2=CC=CC=C2F)C(=O)N3CCC[C@H]3CC4=NN=C(O4)C5=CC=CC=C5	0.421963	0.864967	2161.04
Naphthalen-1-yl 1-(5-fluoropentyl)-1h-indole-3-carboxylate	C1=CC=C2C(=C1)C=CC=C2OC(=O)C3=CN(C4=CC=CC=C43)CCCCCF	0.220213	0.877977	2127.52
1-[(4S)-4-Fluoropentyl]-N-naphthalen-1-ylindole-3-carboxamide	C[C@@H](CCCN1C=C(C2=CC=CC=C21)C(=O)NC3=CC=CC4=CC=CC=C43)F	0.429186	0.861168	2163.44
1-[(4R)-4-Fluoropentyl]-N-naphthalen-1-ylindole-3-carboxamide	C[C@H](CCCN1C=C(C2=CC=CC=C21)C(=O)NC3=CC=CC4=CC=CC=C43)F	0.429186	0.861168	2163.44
Veratramine	C[C@H]1C[C@H]([C@@H](NC1)[C@@H](C)C2=C(C3=C(C=C2)[C@@H]4CC=C5C[C@H](CC[C@@]5([C@H]4C3)C)O)C)O	0.626145	0.807017	2396.67
[1-[(4S)-4-Hydroxypentyl]indol-3-yl]-(4-hydroxyphenyl)methanone	C[C@@H](CCCN1C=C(C2=CC=CC=C21)C(=O)C3=CC=C(C=C3)O)O	0.679348	0.921306	1698.67
[1-[(4S)-4-Hydroxypentyl]indol-3-yl]-(4-methoxyphenyl)methanone	C[C@@H](CCCN1C=C(C2=CC=CC=C21)C(=O)C3=CC=C(C=C3)OC)O	0.662026	0.976499	1793.91
Glimepiride	CCC1=C(CN(C1=O)C(=O)NCCC2=CC=C(C=C2)S(=O)(=O)NC(=O)NC3CCC(CC3)C)C	0.541762	0.586158	2399.81
Fmoc-D-Leu-OH	CC(C)C[C@H](C(=O)O)NC(=O)OCC1C2=CC=CC=C2C3=CC=CC=C13	0.822187	0.921306	1668.74
6-Cyclopropyl-8-fluoro-2-[2-(hydroxymethyl)-3-[1-methyl-5-[[5-(4-methylpiperazin-1-yl)pyridin-2-yl]amino]-6-oxopyridin-3-yl]phenyl]isoquinolin-1-one	CN1CCN(CC1)C2=CN=C(C=C2)NC3=CC(=CN(C3=O)C)C4=C(C(=CC=C4)N5C=CC6=CC(=CC(=C6C5=O)F)C7CC7)CO	0.276073	0.717858	3625.47
5-Fluoro-NPB-22	C1=CC=C2C(=C1)C(=NN2CCCCCF)C(=O)OC3=CC=CC4=C3N=CC=C4	0.259915	0.991747	2031.98
4-(Tert-Butyl)-N-(2-methyl-3-(4-methyl-6-((4-(morpholine-4-carbonyl)phenyl)amino)-5-oxo-4,5-dihydropyrazin-2-yl)phenyl)benzamide	CC1=C(C=CC=C1NC(=O)C2=CC=C(C=C2)C(C)(C)C)C3=CN(C(=O)C(=N3)NC4=CC=C(C=C4)C(=O)N5CCOCC5)C	0.311664	0.670951	3214.7
JWH 018 6-methoxyindole analog	CCCCCN1C=C(C2=C1C=C(C=C2)OC)C(=O)C3=CC=CC4=CC=CC=C43	0.284976	0.872564	2219.82
(1-(5-Fluoropentyl)-1H-indol-3-yl)(naphthalen-1-yl)methanone	C1=CC=C2C(=C1)C=CC=C2C(=O)C3=CN(C4=CC=CC=C43)CCCCCF	0.285791	0.834824	2105.1
3-Fluoro-5-(2-methyl-1,3-benzothiazol-5-yl)benzonitrile	CC1=NC2=C(S1)C=CC(=C2)C3=CC(=CC(=C3)C#N)F	0.660049	0.997263	1193.89
N-[(2R)-1-Amino-3,3-dimethyl-1-oxobutan-2-yl]-1-(5-fluoropentyl)indole-3-carboxamide	CC(C)(C)[C@H](C(=O)N)NC(=O)C1=CN(C2=CC=CC=C21)CCCCCF	0.706973	0.921247	1799.41
N-2-(Biphenyl-4-Ylsulfonyl)-N-2-(Isopropyloxy)-Acetohydroxamic Acid	CC(C)ON(CC(=O)NO)S(=O)(=O)C1=CC=C(C=C1)C2=CC=CC=C2	0.579899	0.916881	1569.81
N-[(2R)-1-Amino-3,3-dimethyl-1-oxobutan-2-yl]-1-(cyclohexylmethyl)indole-3-carboxamide	CC(C)(C)[C@H](C(=O)N)NC(=O)C1=CN(C2=CC=CC=C21)CC3CCCCC3	0.839603	0.91881	1972.49
1-(5-Chloro-2-methoxyphenyl)-3-(2-methylquinolin-4-yl)urea	CC1=NC2=CC=CC=C2C(=C1)NC(=O)NC3=C(C=CC(=C3)Cl)OC	0.715435	0.921306	1558.29
[1-[(4R)-4-Hydroxypentyl]indol-3-yl]-(4-hydroxyphenyl)methanone	C[C@H](CCCN1C=C(C2=CC=CC=C21)C(=O)C3=CC=C(C=C3)O)O	0.679348	0.921306	1698.67
Auda	C1C2CC3CC1CC(C2)(C3)NC(=O)NCCCCCCCCCCCC(=O)O	0.375053	0.831832	1977.35
Snx-5422	CC1(CC2=C(C(=O)C1)C(=NN2C3=CC(=C(C=C3)C(=O)N)NC4CCC(CC4)OC(=O)CN)C(F)(F)F)C	0.494859	0.513947	2386.25
1-(5-Fluoropentyl)-N-(naphthalen-1-yl)-1h-pyrrolo[3,2-c]pyridine-3-carboxamide	C1=CC=C2C(=C1)C=CC=C2NC(=O)C3=CN(C4=C3C=NC=C4)CCCCCF	0.428595	0.93886	2115.17
N-[5-[[(5E)-5-[(3As,4R,5S,6aR)-5-hydroxy-4-[(E,3S)-3-hydroxyoct-1-enyl]-3,3a,4,5,6,6a-hexahydro-1H-pentalen-2-ylidene]pentanoyl]amino]pentyl]-5-[(3aS,4R,6aS)-2-oxo-1,3,3a,4,6,6a-hexahydrothieno[3,4-d]imidazol-4-yl]pentanamide	CCCCC[C@@H](/C=C/[C@H]1[C@H](C[C@@H]2[C@@H]1C/C(=C/CCCC(=O)NCCCCCNC(=O)CCCC[C@@H]3[C@@H]4[C@@H](CS3)NC(=O)N4)/C2)O)O	0.0574477	0.451336	3625.86
8-[(1R,2S)-2-{(1R,2R)-2-Pentylcyclopropylmethyl}-cyclopropyl]octanoic acid	CCCCC[C@@H]1C[C@@H]1C[C@@H]2C[C@H]2CCCCCCCC(=O)O	0.396866	0.890621	1670.06
JWH 398 N-(5-hydroxypentyl) metabolite	C1=CC=C2C(=C1)C(=CC=C2Cl)C(=O)C3=CN(C4=CC=CC=C43)CCCCCO	0.317304	0.890509	2133.03
1-(4-(6-Methyl-5-(3,4,5-trimethoxyphenyl)pyridin-3-yl)phenyl)piperazine	CC1=C(C=C(C=N1)C2=CC=C(C=C2)N3CCNCC3)C4=CC(=C(C(=C4)OC)OC)OC	0.647574	0.898766	2125.68
N-[[(1R,4As,10aS)-1,4a-dimethyl-7-propan-2-yl-2,3,4,9,10,10a-hexahydrophenanthren-1-yl]methyl]dodecanamide	CCCCCCCCCCCC(=O)NC[C@@]1(CCC[C@]2([C@@H]1CCC3=C2C=CC(=C3)C(C)C)C)C	0.288322	0.588854	2868.44
Tpl2 Kinase Inhibitor	C1=CC(=CN=C1)CNC2=NC=C3C(=C2)C(=C(C=N3)C#N)NC4=CC(=C(C=C4)F)Cl	0.484	0.872384	1873.37
N-[(2S)-1-Amino-3,3-dimethyl-1-oxobutan-2-yl]-1-[(4S)-4-hydroxypentyl]indazole-3-carboxamide	C[C@@H](CCCN1C2=CC=CC=C2C(=N1)C(=O)N[C@H](C(=O)N)C(C)(C)C)O	0.699336	0.824215	1770.99
Prazosin	COC1=C(C=C2C(=C1)C(=NC(=N2)N3CCN(CC3)C(=O)C4=CC=CO4)N)OC	0.726562	0.932339	1809.95
N-(3-{[2-(4-Amino-1,2,5-oxadiazol-3-yl)-1-ethyl-1H-imidazo[4,5-c]pyridin-6-yl]oxy}phenyl)-4-[2-(morpholin-4-yl)ethoxy]benzamide	CCN1C2=CC(=NC=C2N=C1C3=NON=C3N)OC4=CC=CC(=C4)NC(=O)C5=CC=C(C=C5)OCCN6CCOCC6	0.251487	0.539934	2992.69
1-(4-(5-Chloro-4-(3,5-dimethylpyridin-2-yl)pyridin-2-yl)piperazin-1-yl)-3-(methylsulfonyl)propan-1-one	CC1=CC(=C(N=C1)C2=CC(=NC=C2Cl)N3CCN(CC3)C(=O)CCS(=O)(=O)C)C	0.715595	0.887847	1981.3
(1S)-4,4,4-Trifluoro-1-[(3S,8S,9S,10R,13S,14S,17S)-3-hydroxy-10,13-dimethyl-2,3,4,7,8,9,10,11,12,13,14,15,16,17-tetradecahydro-1H-cyclopenta[a]phenanthren-17-yl]-3-(trifluoromethyl)butane-1,3-diol	C[C@]12CC[C@H]3[C@H]([C@@H]1CC[C@@H]2[C@H](CC(C(F)(F)F)(C(F)(F)F)O)O)CC=C4[C@@]3(CC[C@@H](C4)O)C	0.36459	0.661662	2104.54
5-Fluoro-adb-pinaca, (S)-	CC(C)(C)[C@@H](C(=O)N)NC(=O)C1=NN(C2=CC=CC=C21)CCCCCF	0.707662	0.92114	1751.86
Isoquinolin-8-yl1-(5-fluoropentyl)-1H-indole-3-carboxylate	C1=CC=C2C(=C1)C(=CN2CCCCCF)C(=O)OC3=CC=CC4=C3C=NC=C4	0.241309	0.964708	2088.34
N-[5-[[(5E)-5-[(3As,4R,5R,6aR)-5-hydroxy-4-[(E,3S)-3-hydroxyoct-1-enyl]-3,3a,4,5,6,6a-hexahydro-1H-pentalen-2-ylidene]pentanoyl]amino]pentyl]-5-[(3aS,4R,6aS)-2-oxo-1,3,3a,4,6,6a-hexahydrothieno[3,4-d]imidazol-4-yl]pentanamide	CCCCC[C@@H](/C=C/[C@H]1[C@@H](C[C@@H]2[C@@H]1C/C(=C/CCCC(=O)NCCCCCNC(=O)CCCC[C@@H]3[C@@H]4[C@@H](CS3)NC(=O)N4)/C2)O)O	0.0574477	0.451336	3625.86
N-[(1R)-1-[[(Cyanoamino)-(quinolin-5-ylamino)methylidene]amino]-2,2-dimethylpropyl]-2-(3,4-dimethoxyphenyl)acetamide	CC(C)(C)[C@H](NC(=O)CC1=CC(=C(C=C1)OC)OC)N=C(NC#N)NC2=CC=CC3=C2C=CC=N3	0.205987	0.615878	2434.37
3-[({4-[4-({[(1R)-1-(2-Chlorophenyl)ethoxy]carbonyl}amino)-3-methyl-1,2-oxazol-5-yl]phenyl}methyl)sulfanyl]propanoic acid	CC1=NOC(=C1NC(=O)O[C@H](C)C2=CC=CC=C2Cl)C3=CC=C(C=C3)CSCCC(=O)O	0.349563	0.622233	1995.19
Purvalanol B	CC(C)[C@H](CO)NC1=NC(=C2C(=N1)N(C=N2)C(C)C)NC3=CC(=C(C=C3)C(=O)O)Cl	0.421542	0.623167	1937.88
3-[({4-[4-({[(1S)-1-(2-Chlorophenyl)ethoxy]carbonyl}amino)-3-methyl-1,2-oxazol-5-yl]phenyl}methyl)sulfanyl]propanoic acid	CC1=NOC(=C1NC(=O)O[C@@H](C)C2=CC=CC=C2Cl)C3=CC=C(C=C3)CSCCC(=O)O	0.349563	0.622233	1995.19
6-[(1~{r})-1-[8-Fluoranyl-6-(1-Methylpyrazol-4-Yl)-[1,2,4]triazolo[4,3-A]pyridin-3-Yl]ethyl]-3-(2-Methoxyethoxy)-1,6-Naphthyridin-5-One	C[C@H](C1=NN=C2N1C=C(C=C2F)C3=CN(N=C3)C)N4C=CC5=C(C4=O)C=C(C=N5)OCCOC	0.342067	0.831371	2506.06
4-[5-(4-Fluoro-phenyl)-2-(4-methanesulfinyl-phenyl)-3H-imidazol-4-YL]-pyridine	C[S@](=O)C1=CC=C(C=C1)C2=NC(=C(N2)C3=CC=NC=C3)C4=CC=C(C=C4)F	0.561614	0.968223	1806.02
4-((9-Cyclopentyl-7,7-difluoro-5-methyl-6-oxo-6,7,8,9-tetrahydro-5H-pyrimido[4,5-b][1,4]diazepin-2-yl)amino)-2-fluoro-5-methoxy-N-(1-methylpiperidin-4-yl)benzamide	CN1CCC(CC1)NC(=O)C2=CC(=C(C=C2F)NC3=NC=C4C(=N3)N(CC(C(=O)N4C)(F)F)C5CCCC5)OC	0.552347	0.704273	2639.82
6-(Tert-Butylsulfonyl)-N-(5-Fluoro-2h-Indazol-3-Yl)quinolin-4-Amine	CC(C)(C)S(=O)(=O)C1=CC2=C(C=CN=C2C=C1)NC3=NNC4=C3C=C(C=C4)F	0.527928	0.884159	2070.75
Bedaquiline	CN(C)CC[C@@](C1=CC=CC2=CC=CC=C21)([C@H](C3=CC=CC=C3)C4=C(N=C5C=CC(=CC5=C4)Br)OC)O	0.221355	0.598161	2899.93
3-(3-(Tert-butylthio)-1-(4-chlorobenzyl)-5-isopropyl-1H-indol-2-yl)-2,2-dimethylpropanoic acid	CC(C)C1=CC2=C(C=C1)N(C(=C2SC(C)(C)C)CC(C)(C)C(=O)O)CC3=CC=C(C=C3)Cl	0.354547	0.613577	2332.78
[5-(4-Bromophenyl)-1-(2,4-dichlorophenyl)-4-methyl-1H-pyrazol-3-yl](4-methoxyphenyl)-methanone	CC1=C(N(N=C1C(=O)C2=CC=C(C=C2)OC)C3=C(C=C(C=C3)Cl)Cl)C4=CC=C(C=C4)Br	0.264755	0.626291	1973.48
N-[5-[[(5E)-5-[(3As,4R,5S,6aR)-5-hydroxy-4-[(E,3R)-3-hydroxyoct-1-enyl]-3,3a,4,5,6,6a-hexahydro-1H-pentalen-2-ylidene]pentanoyl]amino]pentyl]-5-[(3aS,4R,6aS)-2-oxo-1,3,3a,4,6,6a-hexahydrothieno[3,4-d]imidazol-4-yl]pentanamide	CCCCC[C@H](/C=C/[C@H]1[C@H](C[C@@H]2[C@@H]1C/C(=C/CCCC(=O)NCCCCCNC(=O)CCCC[C@@H]3[C@@H]4[C@@H](CS3)NC(=O)N4)/C2)O)O	0.0574477	0.451336	3625.86
2-Ethoxy-1-[[2'-(1H-tetrazol-5-yl)-4-biphenylyl]methyl]-1H-benzimidazole-7-carboxylic acid (1R)-1-(cyclohexyloxycarbonyloxy)ethyl ester	CCOC1=NC2=CC=CC(=C2N1CC3=CC=C(C=C3)C4=CC=CC=C4C5=NNN=N5)C(=O)O[C@@H](C)OC(=O)OC6CCCCC6	0.14091	0.50149	3328.41
Abiraterone acetate	CC(=O)O[C@H]1CC[C@@]2([C@H]3CC[C@]4([C@H]([C@@H]3CC=C2C1)CC=C4C5=CN=CC=C5)C)C	0.460458	0.899021	2249.25
Pyridine, 4-(4-(4-fluorophenyl)-2-(5-((R)-methylsulfinyl)phenyl)-1H-imidazol-4-yl)-	C[S@@](=O)C1=CC=C(C=C1)C2=NC(=C(N2)C3=CC=NC=C3)C4=CC=C(C=C4)F	0.561614	0.968223	1806.02
Protein Tyrosine Phosphatase Inhibitor IV	CC(C)(C1=CC=C(C=C1)C(C)(C)C2=CC=C(C=C2)NS(=O)(=O)C(F)(F)F)C3=CC=C(C=C3)NS(=O)(=O)C(F)(F)F	0.273479	0.556108	2435.37
N-(3-(5-Chloro-2-(2-methoxy-4-(4-methylpiperazin-1-yl)phenylamino)pyrimidin-4-yloxy)phenyl)acrylamide	CN1CCN(CC1)C2=CC(=C(C=C2)NC3=NC=C(C(=N3)OC4=CC=CC(=C4)NC(=O)C=C)Cl)OC	0.440543	0.736848	2341.99
Benzamide, 2-[[2-[[2-methoxy-4-(4-morpholinyl)phenyl]amino]-5-(trifluoromethyl)-4-pyridinyl]amino]-N-methyl-	CNC(=O)C1=CC=CC=C1NC2=CC(=NC=C2C(F)(F)F)NC3=C(C=C(C=C3)N4CCOCC4)OC	0.429062	0.677323	2314.94
N-{2-[(5-Chloro-2-{[2-methoxy-4-(morpholin-4-yl)phenyl]amino}pyrimidin-4-yl)amino]phenyl}methanesulfonamide	COC1=C(C=CC(=C1)N2CCOCC2)NC3=NC=C(C(=N3)NC4=CC=CC=C4NS(=O)(=O)C)Cl	0.420203	0.606263	2303.83
Eluxadoline	CC1=CC(=CC(=C1C[C@@H](C(=O)N(CC2=CC(=C(C=C2)OC)C(=O)O)[C@@H](C)C3=NC=C(N3)C4=CC=CC=C4)N)C)C(=O)N	0.210542	0.436575	3019.27
N-[5-[[(5E)-5-[(3As,4R,5R,6aR)-5-hydroxy-4-[(E,3R)-3-hydroxyoct-1-enyl]-3,3a,4,5,6,6a-hexahydro-1H-pentalen-2-ylidene]pentanoyl]amino]pentyl]-5-[(3aS,4R,6aS)-2-oxo-1,3,3a,4,6,6a-hexahydrothieno[3,4-d]imidazol-4-yl]pentanamide	CCCCC[C@H](/C=C/[C@H]1[C@@H](C[C@@H]2[C@@H]1C/C(=C/CCCC(=O)NCCCCCNC(=O)CCCC[C@@H]3[C@@H]4[C@@H](CS3)NC(=O)N4)/C2)O)O	0.0574477	0.451336	3625.86
6-Chloro-9-((4-methoxy-3,5-dimethylpyridin-2-yl)methyl)-9H-purin-2-amine	CC1=CN=C(C(=C1OC)C)CN2C=NC3=C2N=C(N=C3Cl)N	0.743725	0.976163	1363.11
N-[[(1R,4As,10aR)-1,4a-dimethyl-7-propan-2-yl-2,3,4,9,10,10a-hexahydrophenanthren-1-yl]methyl]dodecanamide	CCCCCCCCCCCC(=O)NC[C@@]1(CCC[C@]2([C@H]1CCC3=C2C=CC(=C3)C(C)C)C)C	0.288322	0.588854	2868.44
(1R)-5-Hydroxy-9,9-dimethyl-15-phenyl-8-oxa-13,15,17-triazatetracyclo[8.7.0.02,7.013,17]heptadeca-2(7),3,5,10-tetraene-14,16-dione	CC1(C2=CCN3C(=O)N(C(=O)N3[C@H]2C4=C(O1)C=C(C=C4)O)C5=CC=CC=C5)C	0.659773	0.968264	2028.24
6-[2-[5-Chloro-2-[(2,4-difluorophenyl)methoxy]phenyl]-1-cyclopentenyl]pyridine-2-carboxylic Acid	C1CC(=C(C1)C2=C(C=CC(=C2)Cl)OCC3=C(C=C(C=C3)F)F)C4=NC(=CC=C4)C(=O)O	0.481487	0.731989	1976
CID 72199293	CCC(CC)N1C=CC2=C(C=C(C=C21)C#N)C(=O)NCC3=C(C=C(NC3=O)C)C	0.663503	0.897034	2169.32
N-6,9alpha-Methylene-11alpha,15S-dihydroxy-prosta-5E,13E-dien-1-oyl-N-biotinoyl-1,5-diaminopentane	CCCCC[C@@H](/C=C/[C@H]1[C@@H](C[C@H]2[C@@H]1C/C(=C/CCCC(=O)NCCCCCNC(=O)CCCC[C@@H]3[C@@H]4[C@H](CS3)NC(=O)N4)/C2)O)O	0.0574477	0.451336	3625.86
Isoquinolin-5-yl1-(5-fluoropentyl)-1H-indole-3-carboxylate	C1=CC=C2C(=C1)C(=CN2CCCCCF)C(=O)OC3=CC=CC4=C3C=CN=C4	0.241309	0.964708	2088.34
Zaprinast	CCCOC1=CC=CC=C1C2=NC3=NNN=C3C(=O)N2	0.749103	0.916596	1329.42
N-[(2S)-1-Amino-4-hydroxy-3,3-dimethyl-1-oxobutan-2-yl]-1-[(4-hydroxycyclohexyl)methyl]indazole-3-carboxamide	CC(C)(CO)[C@@H](C(=O)N)NC(=O)C1=NN(C2=CC=CC=C21)CC3CCC(CC3)O	0.552559	0.663214	1998.89
2-[(3s)-1-{[2-(Methylamino)pyrimidin-5-Yl]methyl}piperidin-3-Yl]-6-(Thiophen-2-Yl)pyrimidin-4(1h)-One	CNC1=NC=C(C=N1)CN2CCC[C@@H](C2)C3=NC(=CC(=O)N3)C4=CC=CS4	0.705546	0.907735	1883.13
N-(2-Phenylphenyl)-8-[4-(3-pyridinyl)-1-triazolyl]octanamide	C1=CC=C(C=C1)C2=CC=CC=C2NC(=O)CCCCCCCN3C=C(N=N3)C4=CN=CC=C4	0.291543	0.782478	2487.15
HMTase Inhibitor IX	CCC(CC)(C(=O)N[C@@H](CCCN=C(N)N)C(=O)NC1(CCCC1)C(=O)NC(C2=CC=C(C=C2)F)C3=CC=C(C=C3)F)NC(=O)C(C)C	0.0904605	0.404272	3323.04
2-[(3R)-1-[[2-(Methylamino)pyrimidin-5-yl]methyl]piperidin-3-yl]-4-thiophen-2-yl-1H-pyrimidin-6-one	CNC1=NC=C(C=N1)CN2CCC[C@H](C2)C3=NC(=CC(=O)N3)C4=CC=CS4	0.705546	0.907735	1883.13
1-[(2R)-2-Fluoropentyl]-N-naphthalen-1-ylindole-3-carboxamide	CCC[C@H](CN1C=C(C2=CC=CC=C21)C(=O)NC3=CC=CC4=CC=CC=C43)F	0.429186	0.861168	2163.44
Nintedanib	CN1CCN(CC1)CC(=O)N(C)C2=CC=C(C=C2)N=C(C3=CC=CC=C3)C4=C(NC5=C4C=CC(=C5)C(=O)OC)O	0.271626	0.709472	2942.33
Bexarotene	CC1=CC2=C(C=C1C(=C)C3=CC=C(C=C3)C(=O)O)C(CCC2(C)C)(C)C	0.727015	0.883453	1872.67
Unii-7M346920EV	CC[C@@H](C)NC1=C(C=C(C(=C1)C(=O)NC2C[C@H]3CC[C@@H](C2)N3C4=NC=C(C=C4)C(=O)C5CC5)C)C(=O)N	0.441184	0.608029	2714.09
Etrasimod	C1CCC(C1)C2=C(C=C(C=C2)COC3=CC4=C(C=C3)NC5=C4CC[C@@H]5CC(=O)O)C(F)(F)F	0.421987	0.605918	2329.02
Venetoclax	CC1(CCC(=C(C1)C2=CC=C(C=C2)Cl)CN3CCN(CC3)C4=CC(=C(C=C4)C(=O)NS(=O)(=O)C5=CC(=C(C=C5)NCC6CCOCC6)[N+](=O)[O-])OC7=CN=C8C(=C7)C=CN8)C	0.0764081	0.269936	4920.79
4-[4-(1-Benzofuran-5-Yl)phenyl]-5-{[(3s)-1-(Cyclopropylcarbonyl)pyrrolidin-3-Yl]methyl}-2,4-Dihydro-3h-1,2,4-Triazol-3-One	C1CN(C[C@@H]1CC2=NNC(=O)N2C3=CC=C(C=C3)C4=CC5=C(C=C4)OC=C5)C(=O)C6CC6	0.524409	0.880747	2459.9
4-[6-Methoxy-2-[(1E)-2-(3-nitrophenyl)ethenyl]-4-oxo-3(4H)-quinazolinyl]-benzoic Acid	COC1=CC2=C(C=C1)N=C(N(C2=O)C3=CC=C(C=C3)C(=O)O)/C=C/C4=CC(=CC=C4)[N+](=O)[O-]	0.350164	0.755593	2257.99
(2-Ethyl-1-pentyl-1H-indol-3-yl)-1-naphthalenylmethanone	CCCCCN1C2=CC=CC=C2C(=C1CC)C(=O)C3=CC=CC4=CC=CC=C43	0.259906	0.772061	2301.38
9-Cyclopentyl-2-[[2-methoxy-4-[(1-methylpiperidin-4-yl)oxy]-phenyl]amino]-7-methyl-7,9-dihydro-8H-purin-8-one	CN1CCC(CC1)OC2=CC(=C(C=C2)NC3=NC=C4C(=N3)N(C(=O)N4C)C5CCCC5)OC	0.612801	0.837351	2464.24
(R)-4-(Amino(phenyl)methyl)-N-(6-methoxybenzo[d]thiazol-2-yl)benzamide	COC1=CC2=C(C=C1)N=C(S2)NC(=O)C3=CC=C(C=C3)[C@@H](C4=CC=CC=C4)N	0.522682	0.898565	1922.29
(25R)-delta(4)-Dafachronic acid	C[C@H](CCC[C@@H](C)C(=O)O)[C@H]1CC[C@@H]2[C@@]1(CC[C@H]3[C@H]2CCC4=CC(=O)CC[C@]34C)C	0.528397	0.758926	2364.69
Ampkinone	CC1(C2=C(C=CC3=C2C(=O)N(C3=O)C4=CC=C(C=C4)C(=O)C5=CC=CC=C5)C6=C(O1)C(=C(C=C6)OC)O)C	0.281426	0.739531	2631.8
[(3R)-3-Aminopiperidin-1-yl]-[2-(1-ethylindol-2-yl)-7-methoxy-1-methylbenzimidazol-5-yl]methanone	CCN1C2=CC=CC=C2C=C1C3=NC4=C(N3C)C(=CC(=C4)C(=O)N5CCC[C@H](C5)N)OC	0.533315	0.874747	2510.65
2-(3,4-Dimethoxybenzyl)-7-((2R,3R)-2-hydroxy-6-phenylhexan-3-yl)-5-methylimidazo[5,1-f][1,2,4]triazin-4(3H)-one	CC1=C2C(=O)NC(=NN2C(=N1)[C@@H](CCCC3=CC=CC=C3)[C@@H](C)O)CC4=CC(=C(C=C4)OC)OC	0.360826	0.736853	2668.82
[1-[(4S)-4-Fluoropentyl]indol-3-yl]-naphthalen-1-ylmethanone	C[C@@H](CCCN1C=C(C2=CC=CC=C21)C(=O)C3=CC=CC4=CC=CC=C43)F	0.377696	0.835013	2105.1
Velpatasvir	C[C@H]1CC[C@H](N1C(=O)[C@H](C(C)C)NC(=O)OC)C2=NC3=C(N2)C=CC4=CC5=C(C=C43)OCC6=C5C=CC(=C6)C7=CN=C(N7)[C@@H]8C[C@@H](CN8C(=O)[C@@H](C9=CC=CC=C9)NC(=O)OC)COC	0.100106	0.232408	5313.57
N'-[1,1-Bis(Oxidanylidene)thian-4-Yl]-5-Ethyl-4-Oxidanylidene-7-[3-(Trifluoromethyl)phenyl]thieno[3,2-C]pyridine-2-Carboximidamide	CCN1C=C(C2=C(C1=O)C=C(S2)C(=NC3CCS(=O)(=O)CC3)N)C4=CC(=CC=C4)C(F)(F)F	0.43467	0.788682	2317.43
2-(3,5-Dimethoxybenzoyl)-N-(1-naphthyl)hydrazinecarboxamide	COC1=CC(=CC(=C1)C(=O)NNC(=O)NC2=CC=CC3=CC=CC=C32)OC	0.618978	0.864125	1725.8
Imidazo[5,1-f][1,2,4]triazin-4(1H)-one, 2-[(3,4-dimethoxyphenyl)methyl]-7-[(1S)-1-[(1R)-1-hydroxyethyl]-4-phenylbutyl]-5-methyl-	CC1=C2C(=O)NC(=NN2C(=N1)[C@H](CCCC3=CC=CC=C3)[C@@H](C)O)CC4=CC(=C(C=C4)OC)OC	0.360826	0.736853	2668.82
(2-Fluorophenyl) N-[2-[[(1S,2R)-2-(butoxymethyl)cyclohexyl]methoxy]ethyl]carbamate	CCCCOC[C@@H]1CCCC[C@@H]1COCCNC(=O)OC2=CC=CC=C2F	0.571312	0.964076	1798.52
N-(Naphthalen-1-yl)-1-pentyl-1H-indole-3-carboxamide	CCCCCN1C=C(C2=CC=CC=C21)C(=O)NC3=CC=CC4=CC=CC=C43	0.407824	0.860844	2157.44
Inosine	C1=NC2=C(C(=O)N1)N=CN2[C@H]3[C@@H]([C@@H]([C@H](O3)CO)O)O	0.482295	0.697001	1111.61
2-[(4-Acetylphenyl)hydrazinylidene]-2-(3,3-dimethyl-4H-isoquinolin-1-yl)acetamide	CC(=O)C1=CC=C(C=C1)NN=C(C2=NC(CC3=CC=CC=C32)(C)C)C(=O)N	0.486012	0.915906	1779.95
Vistusertib	C[C@H]1COCCN1C2=NC(=NC3=C2C=CC(=N3)C4=CC(=CC=C4)C(=O)NC)N5CCOC[C@@H]5C	0.632373	0.822098	2453.75
Methyl (9E,11E,13S)-13-hydroxyoctadeca-9,11-dienoate	CCCCC[C@@H](/C=C/C=C/CCCCCCCC(=O)OC)O	0.280576	0.976499	1541.65
2-[2,4-Bis(trifluoromethyl)imidazo[1,2-a]1,8-naphthyridin-8-yl]-1,3,4-oxadiazole	C1=CC2=NC(=CN2C3=C1C(=CC(=N3)C(F)(F)F)C(F)(F)F)C4=NN=CO4	0.472467	0.995207	1378.9
(4-Amino-2-((1-(methylsulfonyl)piperidin-4-yl)amino)pyrimidin-5-yl)(2,3-difluoro-6-methoxyphenyl)methanone	COC1=C(C(=C(C=C1)F)F)C(=O)C2=CN=C(N=C2N)NC3CCN(CC3)S(=O)(=O)C	0.644437	0.692409	1862.82
[1-[(3R)-3-Fluoropentyl]indol-3-yl]-naphthalen-1-ylmethanone	CC[C@H](CCN1C=C(C2=CC=CC=C21)C(=O)C3=CC=CC4=CC=CC=C43)F	0.377696	0.835013	2105.1
N-[2-[2-[1-(3-Bromophenyl)ethylidene]hydrazinyl]-2-oxo-1-(4-oxo-3H-phthalazin-1-yl)ethyl]benzamide	CC(=NNC(=O)C(C1=NNC(=O)C2=CC=CC=C21)NC(=O)C3=CC=CC=C3)C4=CC(=CC=C4)Br	0.26673	0.60722	2363.24
5-[(6r)-5-Ethanoyl-4-Methyl-2-Oxidanylidene-3-[3-(Trifluoromethyl)phenyl]-1,6-Dihydropyrimidin-6-Yl]pyridine-2-Carbonitrile	CC1=C([C@H](NC(=O)N1C2=CC=CC(=C2)C(F)(F)F)C3=CN=C(C=C3)C#N)C(=O)C	0.84034	0.936005	1698.1
N-[(1S)-1-[[(Cyanoamino)-(quinolin-5-ylamino)methylidene]amino]-2,2-dimethylpropyl]-2-(3,4-dimethoxyphenyl)acetamide	CC(C)(C)[C@@H](NC(=O)CC1=CC(=C(C=C1)OC)OC)N=C(NC#N)NC2=CC=CC3=C2C=CC=N3	0.205987	0.615878	2434.37
N-[2-Methoxy-4-(4-methylpiperazin-1-yl)phenyl]-4-(1-methylpyrrolo[2,3-c]pyridin-3-yl)pyrimidin-2-amine	CN1CCN(CC1)C2=CC(=C(C=C2)NC3=NC=CC(=N3)C4=CN(C5=C4C=CN=C5)C)OC	0.520302	0.878697	2356.34
5-Fluoro THJ	C1=CC=C2C(=C1)C(=NN2CCCCCF)C(=O)NC3=CC=CC4=C3N=CC=C4	0.463024	0.969135	2066.5
(S)-4-(Amino(phenyl)methyl)-N-(6-methoxybenzo[d]thiazol-2-yl)benzamide	COC1=CC2=C(C=C1)N=C(S2)NC(=O)C3=CC=C(C=C3)[C@H](C4=CC=CC=C4)N	0.522682	0.898565	1922.29
Lorlatinib	C[C@@H]1C2=C(C=CC(=C2)F)C(=O)N(CC3=NN(C(=C3C4=CC(=C(N=C4)N)O1)C#N)C)C	0.614697	0.884702	1947.22
Basmisanil	CC1=C(C(=NO1)C2=CC=C(C=C2)F)COC3=NC=C(C=C3)C(=O)N4CCS(=O)(=O)CC4	0.594795	0.855622	2038.71
Glipizide	CC1=CN=C(C=N1)C(=O)NCCC2=CC=C(C=C2)S(=O)(=O)NC(=O)NC3CCCCC3	0.598162	0.618986	2118.69
Quinolin-3-yl1-(5-fluoropentyl)-1H-indole-3-carboxylate	C1=CC=C2C(=C1)C=C(C=N2)OC(=O)C3=CN(C4=CC=CC=C43)CCCCCF	0.313765	0.964708	2088.34
Tolvaptan, (S)-	CC1=CC=CC=C1C(=O)NC2=CC(=C(C=C2)C(=O)N3CCC[C@@H](C4=C3C=CC(=C4)Cl)O)C	0.540891	0.74633	2256.38
7-{(1R,2R,3R,5S)-3,5-Dihydroxy-2-[(R)-3-hydroxy-5-(3-trifluoromethyl-phenyl)-pentyl]-cyclopentyl}-heptanoic acid	C1[C@@H]([C@@H]([C@H]([C@@H]1O)CC[C@H](CCC2=CC(=CC=C2)C(F)(F)F)O)CCCCCCC(=O)O)O	0.323621	0.669234	2114.96
(25S)-delta(4)-Dafachronic acid	C[C@H](CCC[C@H](C)C(=O)O)[C@H]1CC[C@@H]2[C@@]1(CC[C@H]3[C@H]2CCC4=CC(=O)CC[C@]34C)C	0.528397	0.758926	2364.69
Avn-944	CC[C@H](CC#N)OC(=O)N[C@@H](C)C1=CC(=CC=C1)NC(=O)NC2=CC(=C(C=C2)C3=CN=CO3)OC	0.371083	0.527187	2339.35
N-{7-Cyano-6-[4-Fluoro-3-({[3-(Trifluoromethyl)phenyl]acetyl}amino)phenoxy]-1,3-Benzothiazol-2-Yl}cyclopropanecarboxamide	C1CC1C(=O)NC2=NC3=C(S2)C(=C(C=C3)OC4=CC(=C(C=C4)F)NC(=O)CC5=CC(=CC=C5)C(F)(F)F)C#N	0.249139	0.552856	2497.34
N-[1,3-Dimethyl-6-[(2r)-2-Methylpiperazin-1-Yl]-2-Oxidanylidene-Benzimidazol-5-Yl]-2-Methoxy-Benzamide	C[C@@H]1CNCCN1C2=CC3=C(C=C2NC(=O)C4=CC=CC=C4OC)N(C(=O)N3C)C	0.688431	0.863635	2232.17
Quinolin-6-yl1-(5-fluoropentyl)-1H-indole-3-carboxylate	C1=CC=C2C(=C1)C(=CN2CCCCCF)C(=O)OC3=CC4=C(C=C3)N=CC=C4	0.241309	0.964708	2088.34
gamma-Secretase Inhibitor XXI	C[C@@H](C(=O)N[C@@H]1C(=O)N(C2=CC=CC=C2C(=N1)C3=CC=CC=C3)C)NC(=O)CC4=CC(=CC(=C4)F)F	0.556809	0.739999	2385.22
Cediranib	CC1=CC2=C(N1)C=CC(=C2F)OC3=NC=NC4=CC(=C(C=C43)OC)OCCCN5CCCC5	0.371025	0.835634	2418.61
(1-Heptyl-5-phenyl-1H-pyrrol-3-yl)(naphthalen-1-yl)methanone	CCCCCCCN1C=C(C=C1C2=CC=CC=C2)C(=O)C3=CC=CC4=CC=CC=C43	0.212215	0.709781	2419.44
Entrectinib	CN1CCN(CC1)C2=CC(=C(C=C2)C(=O)NC3=NNC4=C3C=C(C=C4)CC5=CC(=CC(=C5)F)F)NC6CCOCC6	0.294244	0.665604	3021.85
2-(Carbamoylamino)-5-[4-(3,5-dimethyl-1,2-oxazol-4-yl)-2-[(3R)-pyrrolidin-3-yl]oxyphenyl]thiophene-3-carboxamide	CC1=C(C(=NO1)C)C2=CC(=C(C=C2)C3=CC(=C(S3)NC(=O)N)C(=O)N)O[C@@H]4CCNC4	0.462504	0.542674	1994.44
(S)-Montelukast	CC(C)(C1=CC=CC=C1CC[C@@H](C2=CC=CC(=C2)/C=C/C3=NC4=C(C=CC(=C4)Cl)C=C3)SCC5(CC5)CC(=O)O)O	0.173564	0.521553	3177.82
(S)-N-(1-(3-Chloro-4-Fluorophenyl)-2-Hydroxyethyl)-4-(4-(3-Chlorophenyl)-1h-Pyrazol-3-Yl)-1h-Pyrrole-2-Carboxamide	C1=CC(=CC(=C1)Cl)C2=C(NN=C2)C3=CNC(=C3)C(=O)N[C@H](CO)C4=CC(=C(C=C4)F)Cl	0.327709	0.676304	1982.32
CID 45268707	CCCCCN1C(=C(C2=CC=CC=C21)C(=O)C3=CC=C(C4=CC=CC=C43)CC)C	0.246618	0.741267	2408.91
N2-[2-Methoxy-4-[4-(4-methyl-1-piperazinyl)-1-piperidinyl]phenyl]-N4-[2-[(1-methylethyl)sulfonyl]phenyl]-1,3,5-triazine-2,4-diamine	CC(C)S(=O)(=O)C1=CC=CC=C1NC2=NC(=NC=N2)NC3=C(C=C(C=C3)N4CCC(CC4)N5CCN(CC5)C)OC	0.385385	0.659631	3086.49
3-Thiophenecarboxamide, 2-((aminocarbonyl)amino)-5-(4-(3,5-dimethyl-4-isoxazolyl)-2-((3S)-3-pyrrolidinyloxy)phenyl)-	CC1=C(C(=NO1)C)C2=CC(=C(C=C2)C3=CC(=C(S3)NC(=O)N)C(=O)N)O[C@H]4CCNC4	0.462504	0.542674	1994.44
[1-[(4R)-4-Hydroxypentyl]indol-3-yl]-(4-methoxynaphthalen-1-yl)methanone	C[C@H](CCCN1C=C(C2=CC=CC=C21)C(=O)C3=CC=C(C4=CC=CC=C43)OC)O	0.443801	0.952817	2253.98
1-[4-(4-Amino-1-propan-2-ylpyrazolo[3,4-d]pyrimidin-3-yl)phenyl]-3-[2-fluoro-5-(trifluoromethyl)phenyl]urea	CC(C)N1C2=NC=NC(=C2C(=N1)C3=CC=C(C=C3)NC(=O)NC4=C(C=CC(=C4)C(F)(F)F)F)N	0.341116	0.635931	2129.8
(2S)-2-[[(1S)-1-[(6R)-2-Amino-1,4,5,6-tetrahydropyrimidin-6-yl]-2-[[(2S,3R)-3-methyl-1-oxo-1-[[(2S)-1-oxo-3-phenylpropan-2-yl]amino]pentan-2-yl]amino]-2-oxoethyl]carbamoylamino]-3-phenylpropanoic acid	CC[C@@H](C)[C@@H](C(=O)N[C@@H](CC1=CC=CC=C1)C=O)NC(=O)[C@H]([C@H]2CCN=C(N2)N)NC(=O)N[C@@H](CC3=CC=CC=C3)C(=O)O	0.141583	0.400622	3067.62
(2S)-2-[[(1S)-1-[(6S)-2-Amino-1,4,5,6-tetrahydropyrimidin-6-yl]-2-[[(2S,3R)-3-methyl-1-oxo-1-[[(2S)-1-oxo-3-phenylpropan-2-yl]amino]pentan-2-yl]amino]-2-oxoethyl]carbamoylamino]-3-phenylpropanoic acid	CC[C@@H](C)[C@@H](C(=O)N[C@@H](CC1=CC=CC=C1)C=O)NC(=O)[C@H]([C@@H]2CCN=C(N2)N)NC(=O)N[C@@H](CC3=CC=CC=C3)C(=O)O	0.141583	0.400622	3067.62
5-Chloro-N4-(2-(isopropylsulfonyl)phenyl)-N2-(2-methoxy-4-(4-(4-methylpiperazin-1-yl)piperidin-1-yl)phenyl)pyrimidine-2,4-diamine	CC(C)S(=O)(=O)C1=CC=CC=C1NC2=NC(=NC=C2Cl)NC3=C(C=C(C=C3)N4CCC(CC4)N5CCN(CC5)C)OC	0.341737	0.703534	3145.44
4-[5-Phenyl-3-(trifluoromethyl)pyrazol-1-yl]benzenesulfonamide	C1=CC=C(C=C1)C2=CC(=NN2C3=CC=C(C=C3)S(=O)(=O)N)C(F)(F)F	0.772142	0.975004	1515.84
7-Nitro-10-octyl-3-phenyl-pyrimido[4,5-b]quinoline-2,4(3H,10H)-dione	CCCCCCCCN1C2=C(C=C(C=C2)[N+](=O)[O-])C=C3C1=NC(=O)N(C3=O)C4=CC=CC=C4	0.157193	0.859864	2530.33
[1-[(4S)-5-Fluoro-4-hydroxypentyl]indol-3-yl]-(4-methylnaphthalen-1-yl)methanone	CC1=CC=C(C2=CC=CC=C12)C(=O)C3=CN(C4=CC=CC=C43)CCC[C@@H](CF)O	0.427487	0.934958	2238.13
6-Bromo-7-{4-[(5-Methylisoxazol-3-Yl)methyl]piperazin-1-Yl}-2-[4-(4-Methylpiperazin-1-Yl)phenyl]-1h-Imidazo[4,5-B]pyridine	CC1=CC(=NO1)CN2CCN(CC2)C3=C4C(=NC=C3Br)N=C(N4)C5=CC=C(C=C5)N6CCN(CC6)C	0.401989	0.777727	2620.37
(2S)-2-[[4-[[4-Methoxy-2-(trifluoromethyl)phenyl]methylcarbamoyl]phenyl]methyl]butanoic acid	CC[C@@H](CC1=CC=C(C=C1)C(=O)NCC2=C(C=C(C=C2)OC)C(F)(F)F)C(=O)O	0.681844	0.863804	1728.83
Asteltoxin	CC[C@@H]1[C@]([C@]2([C@H]([C@H](O[C@H]2O1)/C=C/C=C/C=C/C3=C(C(=CC(=O)O3)OC)C)O)C)(C)O	0.685604	0.838056	2056.69
(2S)-2-[[(1S)-1-[(6S)-2-Amino-1,4,5,6-tetrahydropyrimidin-6-yl]-2-[[(2S,3S)-3-methyl-1-oxo-1-[[(2S)-1-oxo-3-phenylpropan-2-yl]amino]pentan-2-yl]amino]-2-oxoethyl]carbamoylamino]-3-phenylpropanoic acid	CC[C@H](C)[C@@H](C(=O)N[C@@H](CC1=CC=CC=C1)C=O)NC(=O)[C@H]([C@@H]2CCN=C(N2)N)NC(=O)N[C@@H](CC3=CC=CC=C3)C(=O)O	0.141583	0.400622	3067.62
(2S)-N-[(2S)-1-[[(2S)-1-Amino-1-oxopropan-2-yl]amino]-3-naphthalen-2-yl-1-oxopropan-2-yl]-N'-hydroxy-2-(2-methylpropyl)butanediamide	C[C@@H](C(=O)N)NC(=O)[C@H](CC1=CC2=CC=CC=C2C=C1)NC(=O)[C@@H](CC(C)C)CC(=O)NO	0.255857	0.489559	2266.18
N-3-Pyridinyl-4-[[3-[[5-(trifluoromethyl)-2-pyridinyl]oxy]phenyl]methyl]-1-piperidinecarboxamide	C1CN(CCC1CC2=CC(=CC=C2)OC3=NC=C(C=C3)C(F)(F)F)C(=O)NC4=CN=CC=C4	0.529013	0.779613	2139.94
N-Tert-Butyl-2-[4-(3,5-Dimethyl-1,2-Oxazol-4-Yl)phenyl]imidazo[1,2-A]pyrazin-3-Amine	CC1=C(C(=NO1)C)C2=CC=C(C=C2)C3=C(N4C=CN=CC4=N3)NC(C)(C)C	0.563199	0.976441	1896.94
Quinolin-6-yl1-(cyclohexylmethyl)-1H-indole-3-carboxylate	C1CCC(CC1)CN2C=C(C3=CC=CC=C32)C(=O)OC4=CC5=C(C=C4)N=CC=C5	0.320619	0.906669	2265.39
Pitavastatin	C1CC1C2=NC3=CC=CC=C3C(=C2/C=C/[C@H](C[C@H](CC(=O)O)O)O)C4=CC=C(C=C4)F	0.497585	0.783222	2154.04
Naphthalen-2-yl-[1-[(2S)-pentan-2-yl]indol-3-yl]methanone	CCC[C@H](C)N1C=C(C2=CC=CC=C21)C(=O)C3=CC4=CC=CC=C4C=C3	0.385648	0.809872	2105.91
4-[5-(4-Fluorophenyl)-2-(methylthio)-1H-imidazol-4-yl]-N-[(1S)-1-phenylethyl]-2-pyridinamine	C[C@@H](C1=CC=CC=C1)NC2=NC=CC(=C2)C3=C(NC(=N3)SC)C4=CC=C(C=C4)F	0.377243	0.773732	2003.84
N-[(1R)-2-[4-(5-Chloro-2-keto-3H-benzimidazol-1-yl)piperidino]-1-methyl-ethyl]-2-naphthamide	C[C@H](CN1CCC(CC1)N2C3=C(C=C(C=C3)Cl)NC2=O)NC(=O)C4=CC5=CC=CC=C5C=C4	0.455364	0.767157	2590.98
5-Hydroxy-3-(1-naphthoyl)-N-pentyl-1H-indole	CCCCCN1C=C(C2=C1C=CC(=C2)O)C(=O)C3=CC=CC4=CC=CC=C43	0.343601	0.907332	2121.59
(E)-11-Methyldodec-2-enoic acid	CC(C)CCCCCCC/C=C/C(=O)O	0.462835	0.974685	951.489
JWH 018 2'-naphthyl isomer	CCCCCN1C=C(C2=CC=CC=C21)C(=O)C3=CC4=CC=CC=C4C=C3	0.301475	0.828917	2107.42
N-[(2R)-1-Amino-3-methyl-1-oxobutan-2-yl]-1-[(4S)-4-hydroxypentyl]indazole-3-carboxamide	C[C@@H](CCCN1C2=CC=CC=C2C(=N1)C(=O)N[C@H](C(C)C)C(=O)N)O	0.671421	0.824221	1697.94
N-[2-Chloro-5-(trifluoromethyl)phenyl]-2-[4-(2-furoyl)piperazin-1-yl]acetamide	C1CN(CCN1CC(=O)NC2=C(C=CC(=C2)C(F)(F)F)Cl)C(=O)C3=CC=CO3	0.831359	0.906285	1571.12
1-(6-((3-Methoxyestra-1,3,5(10)-trien-17-yl)amino)hexyl)-1H-pyrrole-2,5-dione	C[C@]12CC[C@H]3[C@H]([C@@H]1CC[C@@H]2NCCCCCCN4C(=O)C=CC4=O)CCC5=C3C=CC(=C5)OC	0.412957	0.820195	2625.73
ONO-4059 analogue	C=CC(=O)N1CCC[C@@H](C1)N2C3=NC=NC(=C3N(C2=O)C4=CC=C(C=C4)OC5=CC=CC=C5)N	0.461779	0.797507	2490.4
Fenebrutinib	C[C@H]1CN(CCN1C2=CN=C(C=C2)NC3=CC(=CN(C3=O)C)C4=C(C(=NC=C4)N5CCN6C7=C(CC(C7)(C)C)C=C6C5=O)CO)C8COC8	0.305624	0.638611	3907.33
1-[(2S)-2-Fluoropentyl]-N-naphthalen-1-ylindole-3-carboxamide	CCC[C@@H](CN1C=C(C2=CC=CC=C21)C(=O)NC3=CC=CC4=CC=CC=C43)F	0.429186	0.861168	2163.44
5-(1-Hydroxy-2,2,6,6-tetramethylpiperidin-4-yl)oxypentyl-triphenylphosphanium	CC1(CC(CC(N1O)(C)C)OCCCCC[P+](C2=CC=CC=C2)(C3=CC=CC=C3)C4=CC=CC=C4)C	0.250122	0.632106	2612.97
(1-Heptyl-1H-indol-3-yl)(naphthalen-1-yl)methanone	CCCCCCCN1C=C(C2=CC=CC=C21)C(=O)C3=CC=CC4=CC=CC=C43	0.242077	0.75819	2306.89
N-[(2S)-1-Amino-3,3-dimethyl-1-oxobutan-2-yl]-1-[(4S)-4-hydroxypentyl]indole-3-carboxamide	C[C@@H](CCCN1C=C(C2=CC=CC=C21)C(=O)N[C@H](C(=O)N)C(C)(C)C)O	0.70806	0.859017	1818.57
UNII-JXF8V6O260 component SVAFPMQCQHIESM-SFHVURJKSA-N	CC[C@@H](CCN1C=C(C2=CC=CC=C21)C(=O)NC3=CC=CC4=CC=CC=C43)F	0.429186	0.861168	2163.44
SB-705498	C1CN(C[C@@H]1NC(=O)NC2=CC=CC=C2Br)C3=NC=C(C=C3)C(F)(F)F	0.766933	0.824073	1464.63
Mitoquinol	CC1=C(C(=C(C(=C1O)OC)OC)O)CCCCCCCCCC[P+](C2=CC=CC=C2)(C3=CC=CC=C3)C4=CC=CC=C4	0.0792998	0.523213	3173.97
8-[2alpha-(2alpha-Pentylcyclopropane-1alpha-ylmethyl)cyclopropane-1alpha-yl]octanoic acid	CCCCC[C@@H]1C[C@@H]1C[C@@H]2C[C@@H]2CCCCCCCC(=O)O	0.396866	0.890621	1670.06
(3R)-4-Amino-3-[[1-(cyclohexylmethyl)indazole-3-carbonyl]amino]-2,2-dimethyl-4-oxobutanoic acid	CC(C)([C@H](C(=O)N)NC(=O)C1=NN(C2=CC=CC=C21)CC3CCCCC3)C(=O)O	0.65709	0.716515	1975.7
JWH-122 N-(5-chloropentyl) analog	CC1=CC=C(C2=CC=CC=C12)C(=O)C3=CN(C4=CC=CC=C43)CCCCCCl	0.19463	0.753787	2211.52
2-[3-[[4-(4-Methoxyphenyl)-5-pyridin-4-yl-1,2,4-triazol-3-yl]sulfanyl]propyl]benzo[de]isoquinoline-1,3-dione	COC1=CC=C(C=C1)N2C(=NN=C2SCCCN3C(=O)C4=CC=CC5=C4C(=CC=C5)C3=O)C6=CC=NC=C6	0.156098	0.798181	2668.41
Naphthalen-2-yl-[1-[(2R)-pentan-2-yl]indol-3-yl]methanone	CCC[C@@H](C)N1C=C(C2=CC=CC=C21)C(=O)C3=CC4=CC=CC=C4C=C3	0.385648	0.809872	2105.91
IKK Inhibitor VII	C1CCN(C1)C2CCN(CC2)C(=O)C3=CC=C(C=C3)NC4=NC=CC(=N4)C5=CC6=CC=CC=C6S5	0.388593	0.745391	2617.33
(3Z,5S,8R,9S,10S,13S,14S,17S)-3-Hydroxyimino-10,13,17-trimethyl-2,4,5,6,7,8,9,11,12,14,15,16-dodecahydro-1H-cyclopenta[a]phenanthren-17-ol	C[C@]12CC/C(=N/O)/C[C@@H]1CC[C@@H]3[C@@H]2CC[C@]4([C@H]3CC[C@]4(C)O)C	0.505822	0.921306	1724.42
(R)-(+)-Tolvaptan	CC1=CC=CC=C1C(=O)NC2=CC(=C(C=C2)C(=O)N3CCC[C@H](C4=C3C=CC(=C4)Cl)O)C	0.540891	0.74633	2256.38
Harringtonine	CC(C)(CC[C@@](CC(=O)OC)(C(=O)O[C@H]1[C@H]2C3=CC4=C(C=C3CCN5[C@@]2(CCC5)C=C1OC)OCO4)O)O	0.482596	0.629918	2585.58
Duvelisib	C[C@@H](C1=CC2=C(C(=CC=C2)Cl)C(=O)N1C3=CC=CC=C3)NC4=NC=NC5=C4NC=N5	0.450507	0.848931	2224.38
N-[(2R)-1-Amino-3,3-dimethyl-1-oxobutan-2-yl]-1-(5-hydroxypentyl)indazole-3-carboxamide	CC(C)(C)[C@H](C(=O)N)NC(=O)C1=NN(C2=CC=CC=C21)CCCCCO	0.623735	0.824215	1772.5
25-Hydroxycholesterol	C[C@H](CCCC(C)(C)O)[C@H]1CC[C@@H]2[C@@]1(CC[C@H]3[C@H]2CC=C4[C@@]3(CC[C@@H](C4)O)C)C	0.515009	0.741212	2362.83
N-((1S)-1-Amino-3,3-dimethyl-1-oxobutan-2-yl)-1-(5-fluoropentan-1-yl)-1H-indole-3-carboxamide	CC(C)(C)[C@@H](C(=O)N)NC(=O)C1=CN(C2=CC=CC=C21)CCCCCF	0.706973	0.921247	1799.41
N-[(2S)-1-Amino-3,3-dimethyl-1-oxobutan-2-yl]-1-[(4R)-4-hydroxypentyl]indazole-3-carboxamide	C[C@H](CCCN1C2=CC=CC=C2C(=N1)C(=O)N[C@H](C(=O)N)C(C)(C)C)O	0.699336	0.824215	1770.99
6-(2,3-Dichlorophenyl)-N~4~-Methylpyrimidine-2,4-Diamine	CNC1=NC(=NC(=C1)C2=C(C(=CC=C2)Cl)Cl)N	0.878904	0.921306	874.932
Tazemetostat	CCN(C1CCOCC1)C2=CC(=CC(=C2C)C(=O)NCC3=C(C=C(NC3=O)C)C)C4=CC=C(C=C4)CN5CCOCC5	0.385543	0.721678	3268.54
Niraparib	C1C[C@H](CNC1)C2=CC=C(C=C2)N3C=C4C=CC=C(C4=N3)C(=O)N	0.778874	0.921306	1722.14
JWH 210 N-(5-hydroxypentyl) metabolite	CCC1=CC=C(C2=CC=CC=C12)C(=O)C3=CN(C4=CC=CC=C43)CCCCCO	0.309863	0.910131	2337.95
[1-[(2R)-Butan-2-yl]indol-3-yl]-naphthalen-2-ylmethanone	CC[C@@H](C)N1C=C(C2=CC=CC=C21)C(=O)C3=CC4=CC=CC=C4C=C3	0.421525	0.855126	2003.01
[1-[(3S)-3-Fluoropentyl]indol-3-yl]-naphthalen-1-ylmethanone	CC[C@@H](CCN1C=C(C2=CC=CC=C21)C(=O)C3=CC=CC4=CC=CC=C43)F	0.377696	0.835013	2105.1
Filanesib	CN(C(=O)N1[C@](SC(=N1)C2=C(C=CC(=C2)F)F)(CCCN)C3=CC=CC=C3)OC	0.720276	0.896825	1745.39
(2R)-2-[[4-[[4-Methoxy-2-(trifluoromethyl)phenyl]methylcarbamoyl]phenyl]methyl]butanoic acid	CC[C@H](CC1=CC=C(C=C1)C(=O)NCC2=C(C=C(C=C2)OC)C(F)(F)F)C(=O)O	0.681844	0.863804	1728.83
SAHA-BPyne	C#CCCCC(=O)NC1=CC=C(C=C1)C(=O)C2=CC=C(C=C2)NC(=O)CCCCCCC(=O)NO	0.105232	0.559248	2351.64
Meropenem	C[C@@H]1[C@@H]2[C@H](C(=O)N2C(=C1S[C@H]3C[C@H](NC3)C(=O)N(C)C)C(=O)O)[C@@H](C)O	0.558825	0.809705	1548.67
4-[4-Cyano-2-[[(2S)-2-(4-fluoronaphthalen-1-yl)propanoyl]amino]phenyl]butanoic acid	C[C@@H](C1=CC=C(C2=CC=CC=C21)F)C(=O)NC3=C(C=CC(=C3)C#N)CCCC(=O)O	0.579774	0.873322	2053.44
Ezutromid	CCS(=O)(=O)C1=CC2=C(C=C1)OC(=N2)C3=CC4=CC=CC=C4C=C3	0.554293	1	1844.16
[1-[(4R)-5-Fluoro-4-hydroxypentyl]indol-3-yl]-(4-methylnaphthalen-1-yl)methanone	CC1=CC=C(C2=CC=CC=C12)C(=O)C3=CN(C4=CC=CC=C43)CCC[C@H](CF)O	0.427487	0.934958	2238.13
Vismodegib	CS(=O)(=O)C1=CC(=C(C=C1)C(=O)NC2=CC(=C(C=C2)Cl)C3=CC=CC=N3)Cl	0.662102	0.895168	1736.69
4-Ethylnaphthalen-1-yl-(1-pentylindol-3-yl)methanone	CCCCCN1C=C(C2=CC=CC=C21)C(=O)C3=CC=C(C4=CC=CC=C43)CC	0.259906	0.772061	2309.63
Danirixin	CC1=C(C=CC=C1F)NC(=O)NC2=C(C(=C(C=C2)Cl)S(=O)(=O)[C@H]3CCCNC3)O	0.541419	0.67444	1896.92
N-(3-Fluoro-4-(2-(1-methyl-1H-imidazol-4-yl)thieno[3,2-b]pyridin-7-yloxy)phenylcarbamothioyl)-2-phenylacetamide	CN1C=C(N=C1)C2=CC3=NC=CC(=C3S2)OC4=C(C=C(C=C4)NC(=S)NC(=O)CC5=CC=CC=C5)F	0.282052	0.685949	2467.43
(2S)-2-[[(1S)-1-[(6R)-2-Amino-1,4,5,6-tetrahydropyrimidin-6-yl]-2-[[(2S,3S)-3-methyl-1-oxo-1-[[(2S)-1-oxo-3-phenylpropan-2-yl]amino]pentan-2-yl]amino]-2-oxoethyl]carbamoylamino]-3-phenylpropanoic acid	CC[C@H](C)[C@@H](C(=O)N[C@@H](CC1=CC=CC=C1)C=O)NC(=O)[C@H]([C@H]2CCN=C(N2)N)NC(=O)N[C@@H](CC3=CC=CC=C3)C(=O)O	0.141583	0.400622	3067.62
(S)-1-(4-Fluorobenzyl)-N3-(4-methoxy-3,5-dimethylphenyl)-7-methyl-5-(1H-pyrrole-2-carbonyl)-4,5,6,7-tetrahydro-1H-pyrazolo[4,3-c]pyridine-3,7-dicarboxamide	CC1=CC(=CC(=C1OC)C)NC(=O)C2=NN(C3=C2CN(C[C@]3(C)C(=O)N)C(=O)C4=CC=CN4)CC5=CC=C(C=C5)F	0.318114	0.529597	2875.37
Methyl (2R,4aS,6aR,6aS,14aS,14bS)-10-hydroxy-2,4a,6a,6a,9,14a-hexamethyl-11-oxo-1,3,4,5,6,13,14,14b-octahydropicene-2-carboxylate	CC1=C(C(=O)C=C2C1=CC=C3[C@]2(CC[C@@]4([C@@]3(CC[C@@]5([C@@H]4C[C@](CC5)(C)C(=O)OC)C)C)C)C)O	0.434193	0.660779	2618.21
[1-[(2S)-Butan-2-yl]indol-3-yl]-naphthalen-2-ylmethanone	CC[C@H](C)N1C=C(C2=CC=CC=C21)C(=O)C3=CC4=CC=CC=C4C=C3	0.421525	0.855126	2003.01
UNII-JXF8V6O260 component SVAFPMQCQHIESM-GOSISDBHSA-N	CC[C@H](CCN1C=C(C2=CC=CC=C21)C(=O)NC3=CC=CC4=CC=CC=C43)F	0.429186	0.861168	2163.44
Taurolithocholic acid	C[C@H](CCC(=O)NCCS(=O)(=O)O)[C@H]1CC[C@@H]2[C@@]1(CC[C@H]3[C@H]2CC[C@H]4[C@@]3(CC[C@H](C4)O)C)C	0.464964	0.668995	2624.5
(3Ar,4S,9bR)-4-(4-bromophenyl)-3a,4,5,9b-tetrahydro-3H-cyclopenta[c]quinoline-8-sulfonamide	C1C=C[C@@H]2[C@@H]1[C@H](NC3=C2C=C(C=C3)S(=O)(=O)N)C4=CC=C(C=C4)Br	0.744309	0.871675	1671.83
(3S)-1-[3,5-Bis(trifluoromethyl)benzoyl]-N-(4-chlorophenyl)piperidine-3-carboxamide	C1C[C@@H](CN(C1)C(=O)C2=CC(=CC(=C2)C(F)(F)F)C(F)(F)F)C(=O)NC3=CC=C(C=C3)Cl	0.561019	0.74181	1717.65
4-[4-Cyano-2-[[(2R)-2-(4-fluoranylnaphthalen-1-yl)propanoyl]amino]phenyl]butanoic acid	C[C@H](C1=CC=C(C2=CC=CC=C21)F)C(=O)NC3=C(C=CC(=C3)C#N)CCCC(=O)O	0.579774	0.873322	2053.44
CID 23757106	C[C@H]1C/C(=C/C=C/[C@@H]([C@H](OC(=O)/C(=C/C(=C/[C@H]([C@H]1O)C)/C)/OC)[C@@H](C)[C@H]([C@H](C)C(=O)/C=C/[C@H](C)[C@@H](C(C)C)O)O)OC)/C	0.225674	0.564854	3213.27
(3As,4S,9bR)-4-(4-bromophenyl)-3a,4,5,9b-tetrahydro-3H-cyclopenta[c]quinoline-8-sulfonamide	C1C=C[C@@H]2[C@H]1[C@H](NC3=C2C=C(C=C3)S(=O)(=O)N)C4=CC=C(C=C4)Br	0.744309	0.871675	1671.83
(3R)-1-[3,5-Bis(trifluoromethyl)benzoyl]-N-(4-chlorophenyl)piperidine-3-carboxamide	C1C[C@H](CN(C1)C(=O)C2=CC(=CC(=C2)C(F)(F)F)C(F)(F)F)C(=O)NC3=CC=C(C=C3)Cl	0.561019	0.74181	1717.65
(5-(2-Chlorophenyl)-1-pentyl-1H-pyrrol-3-yl)(naphthalen-1-yl)methanone	CCCCCN1C=C(C=C1C2=CC=CC=C2Cl)C(=O)C3=CC=CC4=CC=CC=C43	0.2336	0.701747	2216.09
3-Chloro-N-((S)-1-(2-(dimethylamino)acetamido)-3-(4-(8-((S)-1-hydroxyethyl)imidazo[1,2-a]pyridin-2-yl)phenyl)propan-2-yl)-4-isopropoxybenzamide	C[C@@H](C1=CC=CN2C1=NC(=C2)C3=CC=C(C=C3)C[C@@H](CNC(=O)CN(C)C)NC(=O)C4=CC(=C(C=C4)OC(C)C)Cl)O	0.223657	0.631426	3079.19
JWH 018 6-hydroxyindole metabolite	CCCCCN1C=C(C2=C1C=C(C=C2)O)C(=O)C3=CC=CC4=CC=CC=C43	0.343601	0.907332	2121.59
Relcovaptan	COC1=C(C=C(C=C1)S(=O)(=O)N2[C@H]([C@](C3=C2C=CC(=C3)Cl)(C4=CC=CC=C4Cl)O)C(=O)N5CCC[C@H]5C(=O)N)OC	0.4134	0.572675	2803.89
(S)-N-(1-(4-(5-Chloro-2-oxo-2,3-dihydro-1H-benzo[d]imidazol-1-yl)piperidin-1-yl)propan-2-yl)-2-naphthamide	C[C@@H](CN1CCC(CC1)N2C3=C(C=C(C=C3)Cl)NC2=O)NC(=O)C4=CC5=CC=CC=C5C=C4	0.455364	0.767157	2590.98
Glycolithocholic acid	C[C@H](CCC(=O)NCC(=O)O)[C@H]1CC[C@@H]2[C@@]1(CC[C@H]3[C@H]2CC[C@H]4[C@@]3(CC[C@H](C4)O)C)C	0.570212	0.759118	2371.98
Pyrido(2,3-d)pyrimidine-6-carbonitrile, 8-cyclopentyl-7,8-dihydro-2-((4-(4-methyl-1-piperazinyl)phenyl)amino)-7-oxo-	CN1CCN(CC1)C2=CC=C(C=C2)NC3=NC=C4C=C(C(=O)N(C4=N3)C5CCCC5)C#N	0.680626	0.878696	2335.42
Stauprimide	C[C@@]12[C@@H]([C@@H](C[C@@H](O1)N3C4=CC=CC=C4C5=C6C(=C7C8=CC=CC=C8N2C7=C53)C(=O)NC6=O)N(C)C(=O)C9=CC=CC=C9)OC	0.275576	0.746346	3589.16
N-[(2S)-1-Amino-3-methyl-1-oxobutan-2-yl]-1-[[(1S,3R)-3-hydroxycyclohexyl]methyl]indazole-3-carboxamide	CC(C)[C@@H](C(=O)N)NC(=O)C1=NN(C2=CC=CC=C21)C[C@H]3CCC[C@H](C3)O	0.71823	0.819949	1907.5
N-[(2R)-1-Amino-3-methyl-1-oxobutan-2-yl]-1-[(2S)-2-fluoropentyl]indazole-3-carboxamide	CCC[C@@H](CN1C2=CC=CC=C2C(=N1)C(=O)N[C@H](C(C)C)C(=O)N)F	0.767476	0.921306	1678.92
6-((2-((4-(2,4-Dichlorophenyl)-5-(4-methyl-1H-imidazol-2-yl)pyrimidin-2-yl)amino)ethyl)amino)nicotinonitrile	CC1=CN=C(N1)C2=CN=C(N=C2C3=C(C=C(C=C3)Cl)Cl)NCCNC4=NC=C(C=C4)C#N	0.331309	0.64829	2068.26
N-((R)-1-(3-Chloro-4-fluorophenyl)-2-hydroxyethyl)-4-(4-(3-chlorophenyl)-1H-pyrazol-3-yl)-1H-pyrrole-2-carboxamide	C1=CC(=CC(=C1)Cl)C2=C(NN=C2)C3=CNC(=C3)C(=O)N[C@@H](CO)C4=CC(=C(C=C4)F)Cl	0.327709	0.676304	1982.32
N-[(2S)-1-Amino-3,3-dimethyl-1-oxobutan-2-yl]-1-(cyclohexylmethyl)indole-3-carboxamide	CC(C)(C)[C@@H](C(=O)N)NC(=O)C1=CN(C2=CC=CC=C21)CC3CCCCC3	0.839603	0.91881	1972.49
Fgfr4-IN-1	COCCNC1=CC(=NC=C1C#N)NC(=O)N2CCCC3=CC(=C(N=C32)C=O)CN4CCOCC4=O	0.412453	0.565585	2331.35
Methyl (2S)-2-[[1-[(4R)-4-fluoropentyl]indazole-3-carbonyl]amino]-3,3-dimethylbutanoate	C[C@H](CCCN1C2=CC=CC=C2C(=N1)C(=O)N[C@H](C(=O)OC)C(C)(C)C)F	0.749831	0.968208	1815.09
Azithromycin	CC[C@@H]1[C@@]([C@@H]([C@H](N(C[C@@H](C[C@@]([C@@H]([C@H]([C@@H]([C@H](C(=O)O1)C)O[C@H]2C[C@@]([C@H]([C@@H](O2)C)O)(C)OC)C)O[C@H]3[C@@H]([C@H](C[C@H](O3)C)N(C)C)O)(C)O)C)C)C)O)(C)O	0.238475	0.410991	3891.46
N-[(2S)-1-Amino-3-methyl-1-oxobutan-2-yl]-1-[[(1R,3S)-3-hydroxycyclohexyl]methyl]indazole-3-carboxamide	CC(C)[C@@H](C(=O)N)NC(=O)C1=NN(C2=CC=CC=C21)C[C@@H]3CCC[C@@H](C3)O	0.71823	0.819949	1907.5
AMP-Deoxynojirimycin	C1[C@@H]([C@H]([C@@H]([C@H](N1CCCCCOCC23CC4CC(C2)CC(C4)C3)CO)O)O)O	0.436302	0.790214	1911.68
K-Ras(G12C) inhibitor 9	COC1=CC(=C(C=C1NCC(=O)N2CCC(CC2)NS(=O)(=O)C=C)I)Cl	0.547014	0.728797	1587.56
Naphthalen-1-yl(1-pentyl-5-phenyl-1H-pyrrol-3-yl)methanone	CCCCCN1C=C(C=C1C2=CC=CC=C2)C(=O)C3=CC=CC4=CC=CC=C43	0.262101	0.776666	2210.04
Spinosyn A	CC[C@H]1CCC[C@@H]([C@H](C(=O)C2=C[C@H]3[C@@H]4C[C@@H](C[C@H]4C=C[C@H]3[C@@H]2CC(=O)O1)O[C@H]5[C@@H]([C@@H]([C@H]([C@@H](O5)C)OC)OC)OC)C)O[C@H]6CC[C@@H]([C@H](O6)C)N(C)C	0.221984	0.733336	4077.03
Methyl (2S)-2-[[1-[(4S)-4-fluoropentyl]indazole-3-carbonyl]amino]-3,3-dimethylbutanoate	C[C@@H](CCCN1C2=CC=CC=C2C(=N1)C(=O)N[C@H](C(=O)OC)C(C)(C)C)F	0.749831	0.968208	1815.09
Vidofludimus	COC1=CC=CC(=C1)C2=CC(=C(C=C2)NC(=O)C3=C(CCC3)C(=O)O)F	0.849817	0.921306	1606.99
Ethyl 4'-((methyl(3-(pyridin-4-yl)benzyl)carbamoyl)oxy)-[1,1'-biphenyl]-4-carboxylate	CCOC(=O)C1=CC=C(C=C1)C2=CC=C(C=C2)OC(=O)N(C)CC3=CC(=CC=C3)C4=CC=NC=C4	0.302394	0.736007	2450.49
Esomeprazole	CC1=CN=C(C(=C1OC)C)C[S@](=O)C2=NC3=C(N2)C=C(C=C3)OC	0.769239	0.976499	1620.23
4-[4-[(Dimethylamino)methyl]-2,5-Dimethoxy-Phenyl]-2-Methyl-2,7-Naphthyridin-1-One	CN1C=C(C2=C(C1=O)C=NC=C2)C3=C(C=C(C(=C3)OC)CN(C)C)OC	0.705825	1	1852.52
Schembl21178064	C1=CC=C2C(=C1)C(=CN2CCCCCF)C(=O)OC3=CC4=C(C=CC=N4)C=C3	0.241309	0.964708	2088.34
(E)-3-(2-Chloro-4-((3-(2,6-dichlorophenyl)-5-isopropylisoxazol-4-yl)methoxy)styryl)benzoic acid	CC(C)C1=C(C(=NO1)C2=C(C=CC=C2Cl)Cl)COC3=CC(=C(C=C3)/C=C/C4=CC(=CC=C4)C(=O)O)Cl	0.225083	0.578535	2354.71
(3Ar,4R,9bR)-4-(4-bromophenyl)-3a,4,5,9b-tetrahydro-3H-cyclopenta[c]quinoline-8-sulfonamide	C1C=C[C@@H]2[C@@H]1[C@@H](NC3=C2C=C(C=C3)S(=O)(=O)N)C4=CC=C(C=C4)Br	0.744309	0.871675	1671.83
Capmatinib	CNC(=O)C1=C(C=C(C=C1)C2=NN3C(=CN=C3N=C2)CC4=CC5=C(C=C4)N=CC=C5)F	0.488891	0.913031	2209.5
Ethylisopropylamiloride	CCN(C1=NC(=C(N=C1Cl)C(=O)N=C(N)N)N)C(C)C	0.538946	0.725063	1042.49
4-(4-Chlorophenyl)-4-[4-(1H-pyrazol-4-yl)phenyl]piperidine	C1CNCCC1(C2=CC=C(C=C2)C3=CNN=C3)C4=CC=C(C=C4)Cl	0.743355	0.921306	1646.24
JWH 081 3-methoxynaphthyl isomer	CCCCCN1C=C(C2=CC=CC=C21)C(=O)C3=CC(=CC4=CC=CC=C43)OC	0.284976	0.872564	2228.07
[1-[(3R)-3-Fluoropentyl]indol-3-yl]-(4-methylnaphthalen-1-yl)methanone	CC[C@H](CCN1C=C(C2=CC=CC=C21)C(=O)C3=CC=C(C4=CC=CC=C43)C)F	0.354929	0.796095	2211.52
N-[(2R)-1-Amino-3,3-dimethyl-1-oxobutan-2-yl]-1-[(4-fluorophenyl)methyl]indazole-3-carboxamide	CC(C)(C)[C@H](C(=O)N)NC(=O)C1=NN(C2=CC=CC=C21)CC3=CC=C(C=C3)F	0.710947	0.907798	1885.4
Pristimerin	CC1=C(C(=O)C=C2C1=CC=C3[C@]2(CC[C@@]4([C@@]3(CC[C@@]5([C@H]4C[C@](CC5)(C)C(=O)OC)C)C)C)C)O	0.434193	0.660779	2618.21
(3As,4R,9bR)-4-(4-Bromophenyl)-3a,4,5,9b-tetrahydro-3H-cyclopenta[c]quinoline-8-sulfonamide	C1C=C[C@@H]2[C@H]1[C@@H](NC3=C2C=C(C=C3)S(=O)(=O)N)C4=CC=C(C=C4)Br	0.744309	0.871675	1671.83
JWH 073 2'-naphthyl isomer	CCCCN1C=C(C2=CC=CC=C21)C(=O)C3=CC4=CC=CC=C4C=C3	0.422941	0.875634	2004.52
(1-Butyl-2-methyl-1H-indol-3-yl)-1-naphthalenylmethanone	CCCCN1C(=C(C2=CC=CC=C21)C(=O)C3=CC=CC4=CC=CC=C43)C	0.399957	0.838538	2093.66
(3-Chlorophenyl)-[(1S)-6,7-dimethoxy-1-[(4-methoxyphenoxy)methyl]-3,4-dihydro-1H-isoquinolin-2-yl]methanone	COC1=CC=C(C=C1)OC[C@@H]2C3=CC(=C(C=C3CCN2C(=O)C4=CC(=CC=C4)Cl)OC)OC	0.478636	0.836269	2196.01
3-(3-Bromo-4-((2,4-difluorobenzyl)oxy)-6-methyl-2-oxopyridin-1(2H)-yl)-N,4-dimethylbenzamide	CC1=C(C=C(C=C1)C(=O)NC)N2C(=CC(=C(C2=O)Br)OCC3=C(C=C(C=C3)F)F)C	0.591743	0.806081	1927.94
N-(4-Chlorophenyl)-N'-(2,2,6,6-tetramethylpiperidin-4-yl)ethanediamide	CC1(CC(CC(N1)(C)C)NC(=O)C(=O)NC2=CC=C(C=C2)Cl)C	0.726622	0.86493	1353.72
Tonabersat	CC(=O)C1=CC2=C(C=C1)OC([C@H]([C@H]2NC(=O)C3=CC(=C(C=C3)F)Cl)O)(C)C	0.782382	0.89506	1616.88
[1-[(3S)-3-Fluoropentyl]indol-3-yl]-(4-methylnaphthalen-1-yl)methanone	CC[C@@H](CCN1C=C(C2=CC=CC=C21)C(=O)C3=CC=C(C4=CC=CC=C43)C)F	0.354929	0.796095	2211.52
SKQ-1 ion	CC1=C(C(=O)C(=CC1=O)CCCCCCCCCC[P+](C2=CC=CC=C2)(C3=CC=CC=C3)C4=CC=CC=C4)C	0.11897	0.59702	2988.33
Travoprost 5,6-trans isomer	CC(C)OC(=O)CCC/C=C/C[C@H]1[C@H](C[C@H]([C@@H]1/C=C/[C@H](COC2=CC=CC(=C2)C(F)(F)F)O)O)O	0.223333	0.673543	2281.52
Navitoclax	CC1(CCC(=C(C1)CN2CCN(CC2)C3=CC=C(C=C3)C(=O)NS(=O)(=O)C4=CC(=C(C=C4)N[C@H](CCN5CCOCC5)CSC6=CC=CC=C6)S(=O)(=O)C(F)(F)F)C7=CC=C(C=C7)Cl)C	0.104649	0.409742	5116.83
2-{[(1r,2s)-2-Aminocyclohexyl]amino}-4-{[3-(2h-1,2,3-Triazol-2-Yl)phenyl]amino}pyrimidine-5-Carboxamide	C1CC[C@H]([C@H](C1)N)NC2=NC=C(C(=N2)NC3=CC(=CC=C3)N4N=CC=N4)C(=O)N	0.492881	0.625959	1936.64
Isoquinolin-7-yl1-(cyclohexylmethyl)-1H-indole-3-carboxylate	C1CCC(CC1)CN2C=C(C3=CC=CC=C32)C(=O)OC4=CC5=C(C=C4)C=CN=C5	0.320619	0.906669	2265.39
N4-(3-Bromophenyl)-N6-methylpyrido[3,4-d]pyrimidine-4,6-diamine	CNC1=NC=C2C(=C1)C(=NC=N2)NC3=CC(=CC=C3)Br	0.768616	0.921306	1220.71
(r)-Omeprazole	CC1=CN=C(C(=C1OC)C)C[S@@](=O)C2=NC3=C(N2)C=C(C=C3)OC	0.769239	0.976499	1620.23
Raltegravir	CC1=NN=C(O1)C(=O)NC(C)(C)C2=NC(=C(C(=O)N2C)O)C(=O)NCC3=CC=C(C=C3)F	0.507297	0.562501	1977.47
(9E,11E,13R)-13-Hydroxy-9,11-octadecadienoic acid methyl ester	CCCCC[C@H](/C=C/C=C/CCCCCCCC(=O)OC)O	0.280576	0.976499	1541.65
Ritonavir	CC(C)C1=NC(=CS1)CN(C)C(=O)N[C@@H](C(C)C)C(=O)N[C@@H](CC2=CC=CC=C2)C[C@@H]([C@H](CC3=CC=CC=C3)NC(=O)OCC4=CN=CS4)O	0.10624	0.395346	3701.05
Necrosulfonamide	COC1=NC=CN=C1NS(=O)(=O)C2=CC=C(C=C2)NC(=O)/C=C/C3=CC=C(S3)[N+](=O)[O-]	0.294844	0.590561	1905.79
3-[1-[[1-(4-Methylphenyl)cyclopropyl]-oxomethyl]-4-piperidinyl]-5-phenyl-1,3,4-oxadiazol-2-one	CC1=CC=C(C=C1)C2(CC2)C(=O)N3CCC(CC3)N4C(=O)OC(=N4)C5=CC=CC=C5	0.666031	0.953811	2154.47
(3S)-4-Amino-3-[[1-(cyclohexylmethyl)indazole-3-carbonyl]amino]-2,2-dimethyl-4-oxobutanoic acid	CC(C)([C@@H](C(=O)N)NC(=O)C1=NN(C2=CC=CC=C21)CC3CCCCC3)C(=O)O	0.65709	0.716515	1975.7
N-[(2S)-1-Amino-3-methyl-1-oxobutan-2-yl]-1-[[(1S,3S)-3-hydroxycyclohexyl]methyl]indazole-3-carboxamide	CC(C)[C@@H](C(=O)N)NC(=O)C1=NN(C2=CC=CC=C21)C[C@H]3CCC[C@@H](C3)O	0.71823	0.819949	1907.5
3,5-Dichloro-2-hydroxy-N-(2-methoxy-5-phenylphenyl)benzenesulfonamide	COC1=C(C=C(C=C1)C2=CC=CC=C2)NS(=O)(=O)C3=C(C(=CC(=C3)Cl)Cl)O	0.592316	0.83087	1722.33
Tepotinib	CN1CCC(CC1)COC2=CN=C(N=C2)C3=CC=CC(=C3)CN4C(=O)C=CC(=N4)C5=CC=CC(=C5)C#N	0.384534	0.812142	2747.66
1-(2-Amino-6-(3,5-dichlorophenyl)pyrido[2,3-d]pyrimidin-7-yl)-3-(tert-butyl)urea	CC(C)(C)NC(=O)NC1=C(C=C2C=NC(=NC2=N1)N)C3=CC(=CC(=C3)Cl)Cl	0.582181	0.789391	1628.91
1-Cycloheptyl-1-(9H-fluoren-2-ylmethyl)-3-(2,4,6-trimethylphenyl)urea	CC1=CC(=C(C(=C1)C)NC(=O)N(CC2=CC3=C(C=C2)C4=CC=CC=C4C3)C5CCCCCC5)C	0.313166	0.625733	2663.25
N-[(2S)-1-Amino-3-methyl-1-oxobutan-2-yl]-1-[[(1R,3R)-3-hydroxycyclohexyl]methyl]indazole-3-carboxamide	CC(C)[C@@H](C(=O)N)NC(=O)C1=NN(C2=CC=CC=C21)C[C@@H]3CCC[C@H](C3)O	0.71823	0.819949	1907.5
Spironolactone	CC(=O)S[C@@H]1CC2=CC(=O)CC[C@@]2([C@@H]3[C@@H]1[C@@H]4CC[C@]5([C@]4(CC3)C)CCC(=O)O5)C	0.571846	0.928207	2081.38
(2E,4E,6Z,8E)-3-Methyl-7-(p-tolyl)-9-(2,6,6-trimethylcyclohex-1-en-1-yl)nona-2,4,6,8-tetraenoic acid	CC1=C(C(CCC1)(C)C)/C=C/C(=C/C=C/C(=C/C(=O)O)/C)/C2=CC=C(C=C2)C	0.426518	0.791774	2062.57
Loratadine	CCOC(=O)N1CCC(=C2C3=C(CCC4=C2N=CC=C4)C=C(C=C3)Cl)CC1	0.704886	0.985962	1837.22
(R)-5-(6-((4-Methylpiperazin-1-yl)methyl)-1H-benzo[d]imidazol-1-yl)-3-(1-(2-(trifluoromethyl)phenyl)ethoxy)thiophene-2-carboxamide	C[C@H](C1=CC=CC=C1C(F)(F)F)OC2=C(SC(=C2)N3C=NC4=C3C=C(C=C4)CN5CCN(CC5)C)C(=O)N	0.351444	0.777504	2649.77
Betrixaban	CN(C)C(=N)C1=CC=C(C=C1)C(=O)NC2=C(C=C(C=C2)OC)C(=O)NC3=NC=C(C=C3)Cl	0.385453	0.6958	2042.55
N-Pyridazin-3-yl-4-[[3-[5-(trifluoromethyl)pyridin-2-yl]oxyphenyl]methylidene]piperidine-1-carboxamide	C1CN(CCC1=CC2=CC(=CC=C2)OC3=NC=C(C=C3)C(F)(F)F)C(=O)NC4=NN=CC=C4	0.570337	0.818005	2066.82
N-[(2S)-1-Amino-3-methyl-1-oxobutan-2-yl]-1-[(2S)-2-fluoropentyl]indazole-3-carboxamide	CCC[C@@H](CN1C2=CC=CC=C2C(=N1)C(=O)N[C@@H](C(C)C)C(=O)N)F	0.767476	0.921306	1678.92
Methanone, (6-methoxy-1-naphthalenyl)(1-pentyl-1H-indol-3-yl)-	CCCCCN1C=C(C2=CC=CC=C21)C(=O)C3=CC=CC4=C3C=CC(=C4)OC	0.284976	0.872564	2228.07
AB-Pinaca	CCCCCN1C2=CC=CC=C2C(=N1)C(=O)N[C@@H](C(C)C)C(=O)N	0.728555	0.921306	1672.81
(E)-3-(4-Bromophenyl)-1-(4-(4-methoxybenzoyl)piperazin-1-yl)prop-2-en-1-one	COC1=CC=C(C=C1)C(=O)N2CCN(CC2)C(=O)/C=C/C3=CC=C(C=C3)Br	0.7001	0.90262	1686.12
3'-Carbamoyl-biphenyl-3-yl-hexylphenylcarbamate	C1=CC=C(C=C1)CCCCCCNC(=O)OC2=CC=CC(=C2)C3=CC(=CC=C3)C(=O)N	0.437546	0.838148	2228.25
[1-[(4S)-4-Hydroxypentyl]indol-3-yl]-(4-methoxynaphthalen-1-yl)methanone	C[C@@H](CCCN1C=C(C2=CC=CC=C21)C(=O)C3=CC=C(C4=CC=CC=C43)OC)O	0.443801	0.952817	2253.98
Quinolin-5-yl1-(5-fluoropentyl)-1H-indole-3-carboxylate	C1=CC=C2C(=C1)C(=CN2CCCCCF)C(=O)OC3=CC=CC4=C3C=CC=N4	0.241309	0.964708	2088.34
Dasabuvir	CC(C)(C)C1=CC(=CC(=C1OC)C2=CC3=C(C=C2)C=C(C=C3)NS(=O)(=O)C)N4C=CC(=O)NC4=O	0.436302	0.697299	2762.57
12,12-Dibromo-N-(methylsulfonyl)-11-dodecenamide	CS(=O)(=O)NC(=O)CCCCCCCCCC=C(Br)Br	0.497149	0.871511	1235.19
1-{4-[4-Amino-1-(1-Methylethyl)-1h-Pyrazolo[3,4-D]pyrimidin-3-Yl]phenyl}-3-[3-(Trifluoromethyl)phenyl]urea	CC(C)N1C2=NC=NC(=C2C(=N1)C3=CC=C(C=C3)NC(=O)NC4=CC=CC(=C4)C(F)(F)F)N	0.385769	0.668884	2127.32
Cudc-101	COC1=C(C=C2C(=C1)N=CN=C2NC3=CC=CC(=C3)C#C)OCCCCCCC(=O)NO	0.179745	0.732169	2202.34
(3S)-7-[(1R,2R,3R,5S)-3,5-Dihydroxy-2-[(E,3R)-3-hydroxyoct-1-enyl]cyclopentyl]-3-methoxyheptanoic acid	CCCCC[C@H](/C=C/[C@H]1[C@@H](C[C@@H]([C@@H]1CCCC[C@@H](CC(=O)O)OC)O)O)O	0.270075	0.778066	1839.08
5-[(3S)-Dithiolan-3-yl]-N-[3-[5-[(3S)-dithiolan-3-yl]pentanoylamino]propyl]pentanamide	C1CSS[C@H]1CCCCC(=O)NCCCNC(=O)CCCC[C@H]2CCSS2	0.285636	0.78487	1630.73
(4-Ethylnaphthalen-1-yl)(5-hydroxy-1-pentyl-1H-indol-3-yl)methanone	CCCCCN1C=C(C2=C1C=CC(=C2)O)C(=O)C3=CC=C(C4=CC=CC=C43)CC	0.291981	0.825748	2332.44
(3R)-7-[(1R,2R,3R,5S)-3,5-Dihydroxy-2-[(E,3S)-3-hydroxyoct-1-enyl]cyclopentyl]-3-methoxyheptanoic acid	CCCCC[C@@H](/C=C/[C@H]1[C@@H](C[C@@H]([C@@H]1CCCC[C@H](CC(=O)O)OC)O)O)O	0.270075	0.778066	1839.08
trans-4-[8-Amino-1-(7-chloro-1H-indol-2-yl)imidazo[1,5-a]pyrazin-3-yl]-cyclohexanecarboxylic acid	C1CC(CCC1C2=NC(=C3N2C=CN=C3N)C4=CC5=C(N4)C(=CC=C5)Cl)C(=O)O	0.462062	0.769115	2032.95
1-(3-Hydroxybenzyl)-3-(4-(pyridin-4-yl)thiazol-2-yl)urea	C1=CC(=CC(=C1)O)CNC(=O)NC2=NC(=CS2)C3=CC=NC=C3	0.686731	0.86493	1391.09
JWH 018 4-hydroxyindole metabolite	CCCCCN1C=C(C2=C1C=CC=C2O)C(=O)C3=CC=CC4=CC=CC=C43	0.343601	0.907332	2121.59
4'-Methyl-JWH-073	CCCCN1C=C(C2=CC=CC=C21)C(=O)C3=CC=C(C4=CC=CC=C43)C	0.399957	0.838538	2101.91
Cc-223	CC(C)(C1=NC=C(C=C1)C2=CN=C3C(=N2)N(C(=O)CN3)C4CCC(CC4)OC)O	0.817316	0.874041	1917.19
Birabresib	CC1=C(SC2=C1C(=N[C@H](C3=NN=C(N32)C)CC(=O)NC4=CC=C(C=C4)O)C5=CC=C(C=C5)Cl)C	0.36675	0.711877	2308.08
Tenovin-3	CC(C)(C)C1=CC=C(C=C1)C(=O)NC(=S)NC2=CC=C(C=C2)N	0.58114	0.86493	1419.92
Apabetalone	CC1=CC(=CC(=C1OCCO)C)C2=NC3=C(C(=CC(=C3)OC)OC)C(=O)N2	0.692717	0.91683	1815.58
2-Methoxy-N-(3-Methyl-2-Oxo-1,2,3,4-Tetrahydroquinazolin-6-Yl)benzenesulfonamide	CN1CC2=C(C=CC(=C2)NS(=O)(=O)C3=CC=CC=C3OC)NC1=O	0.889288	0.921306	1573.47
Isoquinolin-8-yl1-(cyclohexylmethyl)-1H-indole-3-carboxylate	C1CCC(CC1)CN2C=C(C3=CC=CC=C32)C(=O)OC4=CC=CC5=C4C=NC=C5	0.320619	0.906669	2265.39
E6 Berbamine	CN1CCC2=CC(=C3C=C2[C@@H]1CC4=CC=C(C=C4)OC5=C(C=CC(=C5)C[C@@H]6C7=C(O3)C(=C(C=C7CCN6C)OC)OC)OC(=O)C8=CC=C(C=C8)[N+](=O)[O-])OC	0.0720048	0.513868	4271.49
8,11,14-Eicosatriynoic Acid	CCCCCC#CCC#CCC#CCCCCCCC(=O)O	0.491164	0.974685	1479.69
4-(6-Cyclohexylmethoxy-9H-purin-2-ylamino)-N,N-diethylbenzamide	CCN(CC)C(=O)C1=CC=C(C=C1)NC2=NC3=C(C(=N2)OCC4CCCCC4)NC=N3	0.55333	0.833495	2195.3
6-Chloro-5-methyl-1-((2-(2-methylpyrid-3-yloxy)pyrid-5-yl)carbamoyl)indoline	CC1=CC2=C(C=C1Cl)N(CC2)C(=O)NC3=CN=C(C=C3)OC4=C(N=CC=C4)C	0.667918	0.943654	1845.15
4beta-Hydroxycholesterol	C[C@H](CCCC(C)C)[C@H]1CC[C@@H]2[C@@]1(CC[C@H]3[C@H]2CC=C4[C@@]3(CC[C@@H]([C@@H]4O)O)C)C	0.525292	0.756007	2366.83
1-(5-(4-Amino-7-methyl-7H-pyrrolo[2,3-d]pyrimidin-5-yl)-4-fluoroindolin-1-yl)-2-(6-methylpyridin-2-yl)ethanone	CC1=NC(=CC=C1)CC(=O)N2CCC3=C2C=CC(=C3F)C4=CN(C5=NC=NC(=C45)N)C	0.553993	0.904954	2212.28
[(3r)-3-Aminopiperidin-1-Yl][2-(1-Ethyl-1h-Pyrrolo[2,3-B]pyridin-2-Yl)-7-Methoxy-1-Methyl-1h-Benzimidazol-5-Yl]methanone	CCN1C(=CC2=C1N=CC=C2)C3=NC4=C(N3C)C(=CC(=C4)C(=O)N5CCC[C@H](C5)N)OC	0.534821	0.872664	2460.34
1-(5-Cyanopyridin-2-yl)-3-((1S,2S)-2-(6-fluoro-2-hydroxy-3-propanoylphenyl)cyclopropyl)urea	CCC(=O)C1=C(C(=C(C=C1)F)[C@@H]2C[C@@H]2NC(=O)NC3=NC=C(C=C3)C#N)O	0.701714	0.803892	1647.03
(2R,3S,4R,5R)-2-(5-Amino-7-methyl-2,6,7,9,11-pentazatricyclo[6.3.1.04,12]dodeca-1(12),3,5,8,10-pentaen-2-yl)-5-(hydroxymethyl)oxolane-3,4-diol	CN1C2=NC=NC3=C2C(=CN3[C@H]4[C@H]([C@H]([C@H](O4)CO)O)O)C(=N1)N	0.503084	0.670954	1370.49
Cabozantinib	COC1=CC2=C(C=CN=C2C=C1OC)OC3=CC=C(C=C3)NC(=O)C4(CC4)C(=O)NC5=CC=C(C=C5)F	0.307722	0.698103	2511.81
N2-(2-((4-(2,4-Dichlorophenyl)-5-(1H-imidazol-2-yl)pyrimidin-2-yl)amino)ethyl)-5-nitropyridine-2,6-diamine	C1=CC(=C(C=C1Cl)Cl)C2=NC(=NC=C2C3=NC=CN3)NCCNC4=NC(=C(C=C4)[N+](=O)[O-])N	0.162108	0.461442	2040.21
Naphthalen-1-yl-(1-pentylindazol-3-yl)methanone	CCCCCN1C2=CC=CC=C2C(=N1)C(=O)C3=CC=CC4=CC=CC=C43	0.337032	0.959553	2051.89
3-[1-[(4-Chlorophenyl)methyl]-5-fluoro-3-methyl-2-indolyl]-2,2-dimethylpropanoic acid	CC1=C(N(C2=C1C=C(C=C2)F)CC3=CC=C(C=C3)Cl)CC(C)(C)C(=O)O	0.646263	0.952479	1762.99
Bromosporine	CCOC(=O)NC1=CC(=NN2C1=NN=C2C)C3=CC(=C(C=C3)C)NS(=O)(=O)C	0.667879	0.764567	1898.12
(S)-1-(Sec-Butyl)-N-((4,6-dimethyl-2-oxo-1,2-dihydropyridin-3-yl)methyl)-3-methyl-6-(6-(piperazin-1-yl)pyridin-3-yl)-1H-indole-4-carboxamide	CC[C@H](C)N1C=C(C2=C(C=C(C=C21)C3=CN=C(C=C3)N4CCNCC4)C(=O)NCC5=C(C=C(NC5=O)C)C)C	0.326512	0.666335	3145.83
Quinolin-3-yl1-(cyclohexylmethyl)-1H-indole-3-carboxylate	C1CCC(CC1)CN2C=C(C3=CC=CC=C32)C(=O)OC4=CC5=CC=CC=C5N=C4	0.406038	0.906669	2265.39
Hymenialdisine Analogue 1	C1CNC(=O)C2=NC3=CC=CC=C3C2=C1C4=C(N=C(N4)N)O	0.632401	0.762898	1365.93
Rabusertib	CC1=CC(=C(C=C1Br)NC(=O)NC2=NC=C(N=C2)C)OC[C@@H]3CNCCO3	0.667233	0.748018	1669.81
5-Cholesten-3-ol 12-[(7-nitro-2-1,3-benzoxadiazol-4-yl)aMino]dodecanoate	C[C@H](CCCC(C)C)[C@H]1CC[C@@H]2[C@@]1(CC[C@H]3[C@H]2CC=C4[C@@]3(CC[C@@H](C4)OC(=O)CCCCCCCCCCCCNC5=CC=C(C6=NON=C56)[N+](=O)[O-])C)C	0.0438803	0.496229	4783.56
Methyl (2S)-2-[[1-[(4S)-4-fluoropentyl]indazole-3-carbonyl]amino]-3-methylbutanoate	C[C@@H](CCCN1C2=CC=CC=C2C(=N1)C(=O)N[C@@H](C(C)C)C(=O)OC)F	0.731622	0.976172	1741.63
5-Fluoro SDB-005	C1=CC=C2C(=C1)C=CC=C2OC(=O)C3=NN(C4=CC=CC=C43)CCCCCF	0.241309	0.964708	2080.09
Quinolin-8-yl 1-[(4S)-4-hydroxypentyl]indole-3-carboxylate	C[C@@H](CCCN1C=C(C2=CC=CC=C21)C(=O)OC3=CC=CC4=C3N=CC=C4)O	0.396589	0.97079	2099.85
5-(4-Chlorophenyl)-N-(4-piperazin-1-ylphenyl)-N-(pyridin-2-ylmethyl)furan-2-carboxamide	C1CN(CCN1)C2=CC=C(C=C2)N(CC3=CC=CC=N3)C(=O)C4=CC=C(O4)C5=CC=C(C=C5)Cl	0.41492	0.804242	2387.35
Pyridone 6	CC(C)(C)C1=NC2=C(N1)C3=C(C=C(C=C3)F)C4=C2C=CNC4=O	0.482368	0.921306	1743.24
N-2-Naphthalenyl-1-pentyl-1H-indole-3-carboxamide	CCCCCN1C=C(C2=CC=CC=C21)C(=O)NC3=CC4=CC=CC=C4C=C3	0.407824	0.860844	2165.69
RCS-4 N-(5-hydroxypentyl) metabolite	COC1=CC=C(C=C1)C(=O)C2=CN(C3=CC=CC=C32)CCCCCO	0.498364	0.976499	1795.42
Bafilomycin A1	C[C@H]1C/C(=C/C=C/[C@@H]([C@H](OC(=O)/C(=C/C(=C/[C@H]([C@H]1O)C)/C)/OC)[C@@H](C)[C@H]([C@H](C)[C@]2(C[C@H]([C@@H]([C@H](O2)C(C)C)C)O)O)O)OC)/C	0.298341	0.492304	3281.51
3-Dodecanoyl-nbd-cholesterol	C[C@H](CCCC(C)C)[C@H]1CC[C@@H]2[C@@]1(CC[C@H]3[C@H]2CC=C4[C@@]3(CC[C@@H](C4)OC(=O)CCCCCCCCCCCNC5=CC=C(C6=NON=C56)[N+](=O)[O-])C)C	0.0467213	0.496229	4668.92
Azd-1480	CC1=CC(=NN1)NC2=NC(=NC=C2Cl)N[C@@H](C)C3=NC=C(C=N3)F	0.650566	0.843452	1373.63
Naphthalen-1-yl(9-pentyl-9h-carbazol-3-yl)methanone	CCCCCN1C2=C(C=C(C=C2)C(=O)C3=CC=CC4=CC=CC=C43)C5=CC=CC=C51	0.218703	0.719718	2538.16
N-[(1S)-2-[(2Z)-2-[1-(3-Bromophenyl)ethylidene]hydrazinyl]-2-oxo-1-(4-oxo-3H-phthalazin-1-yl)ethyl]benzamide	C/C(=N/NC(=O)[C@H](C1=NNC(=O)C2=CC=CC=C21)NC(=O)C3=CC=CC=C3)/C4=CC(=CC=C4)Br	0.26673	0.60722	2363.24
1-Pentyl-2-methyl-3-(1-naphthoyl)indole	CCCCCN1C(=C(C2=CC=CC=C21)C(=O)C3=CC=CC4=CC=CC=C43)C	0.284784	0.796	2197.21
Amprenavir	CC(C)CN(C[C@H]([C@H](CC1=CC=CC=C1)NC(=O)O[C@H]2CCOC2)O)S(=O)(=O)C3=CC=C(C=C3)N	0.39974	0.553367	2480.87
JWH 073 2'-naphthyl-N-(1,1-dimethylethyl) isomer	CC(C)(C)N1C=C(C2=CC=CC=C21)C(=O)C3=CC4=CC=CC=C4C=C3	0.427685	0.88088	1959.46
(r)-2-(1-(6-Amino-5-chloropyrimidine-4-carboxamido)ethyl)-n-(5-chloro-4-(trifluoromethyl)pyridin-2-yl)thiazole-5-carboxamide	C[C@H](C1=NC=C(S1)C(=O)NC2=NC=C(C(=C2)C(F)(F)F)Cl)NC(=O)C3=C(C(=NC=N3)N)Cl	0.476447	0.53759	1664.89
N-[(1R)-2-[(2Z)-2-[1-(3-Bromophenyl)ethylidene]hydrazinyl]-2-oxo-1-(4-oxo-3H-phthalazin-1-yl)ethyl]benzamide	C/C(=N/NC(=O)[C@@H](C1=NNC(=O)C2=CC=CC=C21)NC(=O)C3=CC=CC=C3)/C4=CC(=CC=C4)Br	0.26673	0.60722	2363.24
Isoquinolin-6-yl1-(cyclohexylmethyl)-1H-indole-3-carboxylate	C1CCC(CC1)CN2C=C(C3=CC=CC=C32)C(=O)OC4=CC5=C(C=C4)C=NC=C5	0.320619	0.906669	2265.39
N-[(2S)-1-Amino-3,3-dimethyl-1-oxobutan-2-yl]-1-[(4R)-4-hydroxypentyl]indole-3-carboxamide	C[C@H](CCCN1C=C(C2=CC=CC=C21)C(=O)N[C@H](C(=O)N)C(C)(C)C)O	0.70806	0.859017	1818.57
Unii-U41S5CG0SG	C/C/1=C/CC[C@@]2([C@H](O2)[C@@H]3[C@@H](CC1)[C@H](C(=O)O3)CN(C)C)C	0.445241	1	1407.73
Celastrol	CC1=C(C(=O)C=C2C1=CC=C3[C@]2(CC[C@@]4([C@@]3(CC[C@@]5([C@H]4C[C@](CC5)(C)C(=O)O)C)C)C)C)O	0.466149	0.63257	2517.91
Incb8761(PF-4136309)	C1CN(C[C@H]1NC2CCC(CC2)(C3=NC=C(C=C3)C4=NC=CC=N4)O)C(=O)CNC(=O)C5=CC(=CC=C5)C(F)(F)F	0.400123	0.585336	2764.9
Novobiocin	CC1=C(C=CC2=C1OC(=O)C(=C2O)NC(=O)C3=CC(=C(C=C3)O)CC=C(C)C)O[C@H]4[C@@H]([C@@H]([C@H](C(O4)(C)C)OC)OC(=O)N)O	0.183746	0.409056	3041.49
Maraviroc	CC1=NN=C(N1C2C[C@H]3CC[C@@H](C2)N3CC[C@@H](C4=CC=CC=C4)NC(=O)C5CCC(CC5)(F)F)C(C)C	0.473786	0.711279	2719.69
Sorafenib	CNC(=O)C1=NC=CC(=C1)OC2=CC=C(C=C2)NC(=O)NC3=CC(=C(C=C3)Cl)C(F)(F)F	0.46134	0.679739	1834.36
Quchic	C1CCC(CC1)CN2C=C(C3=CC=CC=C32)C(=O)OC4=CC=CC5=C4N=CC=C5	0.320619	0.906669	2257.14
(1-(5-Fluoropentyl)-1H-indol-3-yl)(4-methylnaphthalen-1-yl)methanone	CC1=CC=C(C2=CC=CC=C12)C(=O)C3=CN(C4=CC=CC=C43)CCCCCF	0.268569	0.795935	2211.52
5-Fluoro-4-hydroxyquinoline PB-22	C1=CC=C2C(=C1)C(=CC=N2)OC(=O)C3=CN(C4=CC=CC=C43)CCCCCF	0.313765	0.964708	2088.34
N-[2-[4-[[3-Butyl-5-oxo-1-[2-(trifluoromethyl)phenyl]-1,2,4-triazol-4-yl]methyl]phenyl]phenyl]sulfonyl-3-methyl-2-thiophenecarboxamide	CCCCC1=NN(C(=O)N1CC2=CC=C(C=C2)C3=CC=CC=C3S(=O)(=O)NC(=O)C4=C(C=CS4)C)C5=CC=CC=C5C(F)(F)F	0.182915	0.614087	3371.34
p38 MAP Kinase Inhibitor	C1=CC(=CC=C1C2=C(NN(C2=O)C3=CC=C(C=C3)Cl)C4=CC=NC=C4)F	0.572412	0.975569	1719.55
Aurora Kinase Inhibitor II	COC1=C(C=C2C(=C1)C(=NC=N2)NC3=CC=C(C=C3)NC(=O)C4=CC=CC=C4)OC	0.490313	0.880672	2028.48
(3S)-7-[(1R,2R,3R,5S)-3,5-Dihydroxy-2-[(E,3S)-3-hydroxyoct-1-enyl]cyclopentyl]-3-methoxyheptanoic acid	CCCCC[C@@H](/C=C/[C@H]1[C@@H](C[C@@H]([C@@H]1CCCC[C@@H](CC(=O)O)OC)O)O)O	0.270075	0.778066	1839.08
3-Amino-6-(4-(methylsulfonyl)phenyl)-N-phenylpyrazine-2-carboxamide	CS(=O)(=O)C1=CC=C(C=C1)C2=CN=C(C(=N2)C(=O)NC3=CC=CC=C3)N	0.730476	0.86052	1704.97
(4-Fluorophenyl)(2-(4-methoxyphenyl)-1H-imidazol-4-yl)methanone	COC1=CC=C(C=C1)C2=NC=C(N2)C(=O)C3=CC=C(C=C3)F	0.750146	0.976499	1342.31
4-[[(2S)-2-(3-Chlorophenyl)-2-hydroxyethyl]amino]-3-[7-methyl-5-(4-morpholinyl)-1H-benzimidazol-2-yl]-2(1H)-pyridinone	CC1=CC(=CC2=C1N=C(N2)C3=C(C=CNC3=O)NC[C@H](C4=CC(=CC=C4)Cl)O)N5CCOCC5	0.334391	0.626811	2485.01
2-Cyclopentyl-4-(5-phenyl-1H-pyrrolo[2,3-b]pyridin-3-yl)benzoic acid	C1CCC(C1)C2=C(C=CC(=C2)C3=CNC4=C3C=C(C=N4)C5=CC=CC=C5)C(=O)O	0.438116	0.799028	2172.44
3-[10,15,20-Tris(3-hydroxyphenyl)-2,3,21,22,23,24-hexahydroporphyrin-5-yl]phenol	C1CC2=C(C3=CC=C(N3)C(=C4C=CC(=C(C5=CC=C(N5)C(=C1N2)C6=CC(=CC=C6)O)C7=CC(=CC=C7)O)N4)C8=CC(=CC=C8)O)C9=CC(=CC=C9)O	0.102038	0.28172	4172.11
5-trans Fluprostenol	C1[C@@H]([C@@H]([C@H]([C@@H]1O)/C=C/[C@H](COC2=CC=CC(=C2)C(F)(F)F)O)C/C=C/CCCC(=O)O)O	0.298454	0.648705	1994.72
Unii-05235E1S2O	CC(C)(C)[C@@H](C(=O)N)NC(=O)C1=NN(C2=CC=CC=C21)CC3=CC=C(C=C3)F	0.710947	0.907798	1885.4
1-[4-[1-(1,4-Dioxaspiro[4.5]decan-8-yl)-4-(8-oxa-3-azabicyclo[3.2.1]octan-3-yl)pyrazolo[3,4-d]pyrimidin-6-yl]phenyl]-3-methyl-urea	CNC(=O)NC1=CC=C(C=C1)C2=NC3=C(C=NN3C4CCC5(CC4)OCCO5)C(=N2)N6C[C@H]7CC[C@@H](C6)O7	0.538505	0.665849	2702.35
2,6-Difluoro-4-{4-[4-(4-Methylpiperazin-1-Yl)phenyl]pyridin-3-Yl}phenol	CN1CCN(CC1)C2=CC=C(C=C2)C3=C(C=NC=C3)C4=CC(=C(C(=C4)F)O)F	0.739886	0.964105	1813.35
2-Amino-4-(2,4-dichloro-5-(2-(pyrrolidin-1-yl)ethoxy)phenyl)-N-ethylthieno[2,3-d]pyrimidine-6-carboxamide	CCNC(=O)C1=CC2=C(N=C(N=C2S1)N)C3=CC(=C(C=C3Cl)Cl)OCCN4CCCC4	0.51846	0.746737	2013.71
N-(2,6-Dibromo-4-methoxyphenyl)-4-(2-methylimidazo[1,2-a]pyrimidin-3-yl)thiazol-2-amine	CC1=C(N2C=CC=NC2=N1)C3=CSC(=N3)NC4=C(C=C(C=C4Br)OC)Br	0.408937	0.773966	1605.62
Acalabrutinib	CC#CC(=O)N1CCC[C@H]1C2=NC(=C3N2C=CN=C3N)C4=CC=C(C=C4)C(=O)NC5=CC=CC=N5	0.446551	0.691236	2498.13
(S)-2-Methyl-1-[(4-methyl-5-isoquinoline)sulfonyl]-homopiperazine	C[C@H]1CNCCCN1S(=O)(=O)C2=CC=CC3=C2C(=CN=C3)C	0.918414	0.976499	1617.41
CID 25108578	CC(=O)N[C@@H](CC1=CNC2=CC=CC=C21)C(=O)N[C@@H](CCC(=O)O)C(=O)N[C@@H](CC3=CN=CN3)C(=O)N[C@@H](CC(=O)O)C(=O)NC4=CC5=C(C=C4)C(=CC(=O)O5)C(F)(F)F	0.0570732	0.400008	4266.09
3-Oxo-3H-spiro[isobenzofuran-1,9'-xanthene]-3',6'-diylbis(2-(pyridin-2-yldisulfanyl)benzoate)	C1=CC=C2C(=C1)C(=O)OC23C4=C(C=C(C=C4)OC(=O)C5=CC=CC=C5SSC6=CC=CC=N6)OC7=C3C=CC(=C7)OC(=O)C8=CC=CC=C8SSC9=CC=CC=N9	0.0741176	0.545578	3962.34
A-674563	CC1=C2C=C(C=CC2=NN1)C3=CC(=CN=C3)OC[C@H](CC4=CC=CC=C4)N	0.54825	0.921306	1994.51
N-{(2r)-2-[2-(Hydroxyamino)-2-Oxoethyl]-4-Methylpentanoyl}-3-Naphthalen-2-Yl-L-Alanyl-L-Alaninamide	C[C@@H](C(=O)N)NC(=O)[C@H](CC1=CC2=CC=CC=C2C=C1)NC(=O)[C@H](CC(C)C)CC(=O)NO	0.255857	0.489559	2266.18
1-(5-Fluoropentyl)-1H-indole-3-carboxylic acid 8-quinolinyl ester	C1=CC=C2C(=C1)C(=CN2CCCCCF)C(=O)OC3=CC=CC4=C3N=CC=C4	0.241309	0.964708	2080.09
2-[(2S,3R)-1-(4-Chlorobenzoyl)-2-methyl-2,3-dihydroindol-3-yl]-N-octylacetamide	CCCCCCCCNC(=O)C[C@H]1[C@@H](N(C2=CC=CC=C12)C(=O)C3=CC=C(C=C3)Cl)C	0.437991	0.738446	2256.03
N-(4-(3-(2-Aminopyrimidin-4-yl)pyridin-2-yloxy)phenyl)-4-(4-methylthiophen-2-yl)phthalazin-1-amine	CC1=CSC(=C1)C2=NN=C(C3=CC=CC=C32)NC4=CC=C(C=C4)OC5=C(C=CC=N5)C6=NC(=NC=C6)N	0.260207	0.53896	2697.95
Methanone, (2-methoxy-1-naphthalenyl)(1-pentyl-1H-indol-3-yl)-	CCCCCN1C=C(C2=CC=CC=C21)C(=O)C3=C(C=CC4=CC=CC=C43)OC	0.284976	0.872564	2228.07
N-[[1-(Cyclohexylmethyl)-1H-indazol-3-yl]carbonyl]-3-methyl-L-valine	CC(C)(C)[C@@H](C(=O)O)NC(=O)C1=NN(C2=CC=CC=C21)CC3CCCCC3	0.836102	0.917678	1891.64
Methyl (2S)-2-[[1-[(3S)-3-fluoropentyl]indazole-3-carbonyl]amino]-3-methylbutanoate	CC[C@@H](CCN1C2=CC=CC=C2C(=N1)C(=O)N[C@@H](C(C)C)C(=O)OC)F	0.731622	0.976172	1741.63
AB-Fubica	CC(C)[C@@H](C(=O)N)NC(=O)C1=CN(C2=CC=CC=C21)CC3=CC=C(C=C3)F	0.702381	0.919781	1858.94
5,8,11,14-Eicosatetraynoic acid	CCCCCC#CCC#CCC#CCC#CCCCC(=O)O	0.593853	0.974685	1420.5
Bumetanide	CCCCNC1=C(C(=CC(=C1)C(=O)O)S(=O)(=O)N)OC2=CC=CC=C2	0.619558	0.790867	1614.57
N-1-Naphthalenyl-1-pentyl-1H-indazole-3-carboxamide	CCCCCN1C2=CC=CC=C2C(=N1)C(=O)NC3=CC=CC4=CC=CC=C43	0.454471	0.940293	2109.24
N-((4,6-Dimethyl-2-oxo-1,2-dihydropyridin-3-yl)methyl)-1-isopropyl-3-methyl-6-(6-(4-methylpiperazin-1-yl)pyridin-3-yl)-1H-indole-4-carboxamide	CC1=CC(=C(C(=O)N1)CNC(=O)C2=C3C(=CN(C3=CC(=C2)C4=CN=C(C=C4)N5CCN(CC5)C)C(C)C)C)C	0.384193	0.725524	3124.32
4-[4-(6-Methoxynaphthalen-2-yl)-2-[4-[(R)-methylsulfinyl]phenyl]-1H-imidazol-5-yl]pyridine	COC1=CC2=C(C=C1)C=C(C=C2)C3=C(NC(=N3)C4=CC=C(C=C4)[S@](=O)C)C5=CC=NC=C5	0.381127	0.815567	2384.99
N-[(2R)-1-Amino-3-methyl-1-oxobutan-2-yl]-1-[(2R)-2-fluoropentyl]indazole-3-carboxamide	CCC[C@H](CN1C2=CC=CC=C2C(=N1)C(=O)N[C@H](C(C)C)C(=O)N)F	0.767476	0.921306	1678.92
4-[4-(6-Methoxynaphthalen-2-yl)-2-[4-[(S)-methylsulfinyl]phenyl]-1H-imidazol-5-yl]pyridine	COC1=CC2=C(C=C1)C=C(C=C2)C3=C(NC(=N3)C4=CC=C(C=C4)[S@@](=O)C)C5=CC=NC=C5	0.381127	0.815567	2384.99
Retinol	CC1=C(C(CCC1)(C)C)/C=C/C(=C/C=C/C(=C/CO)/C)/C	0.660593	0.874784	1527.15
1-Pentyl-3-(1-naphthoyl)indole	CCCCCN1C=C(C2=CC=CC=C21)C(=O)C3=CC=CC4=CC=CC=C43	0.301475	0.828917	2099.17
N-[(6R)-3-Cyano-6-(2-methylbutan-2-yl)-4,5,6,7-tetrahydro-1-benzothiophen-2-yl]-2-ethylbutanamide	CCC(CC)C(=O)NC1=C(C2=C(S1)C[C@@H](CC2)C(C)(C)CC)C#N	0.735398	0.949777	1655.27
2-[(2S,3S)-1-(4-Chlorobenzoyl)-2-methyl-2,3-dihydroindol-3-yl]-N-octylacetamide	CCCCCCCCNC(=O)C[C@@H]1[C@@H](N(C2=CC=CC=C12)C(=O)C3=CC=C(C=C3)Cl)C	0.437991	0.738446	2256.03
Nitroblue tetrazolium	COC1=C(C=CC(=C1)C2=CC(=C(C=C2)[N+]3=NC(=NN3C4=CC=C(C=C4)[N+](=O)[O-])C5=CC=CC=C5)OC)[N+]6=NC(=NN6C7=CC=C(C=C7)[N+](=O)[O-])C8=CC=CC=C8	0.0837952	0.497172	3970.57
Darapladib	CCN(CC)CCN(CC1=CC=C(C=C1)C2=CC=C(C=C2)C(F)(F)F)C(=O)CN3C4=C(CCC4)C(=O)N=C3SCC5=CC=C(C=C5)F	0.0857457	0.617023	3409.68
Luminespib	CCNC(=O)C1=NOC(=C1C2=CC=C(C=C2)CN3CCOCC3)C4=CC(=C(C=C4O)O)C(C)C	0.481549	0.674347	2333.75
N-[(6S)-3-Cyano-6-(2-methylbutan-2-yl)-4,5,6,7-tetrahydro-1-benzothiophen-2-yl]-2-ethylbutanamide	CCC(CC)C(=O)NC1=C(C2=C(S1)C[C@H](CC2)C(C)(C)CC)C#N	0.735398	0.949777	1655.27
N-Methyl-4-(4-(3-(trifluoromethyl)benzamido)phenoxy)picolinamide	CNC(=O)C1=NC=CC(=C1)OC2=CC=C(C=C2)NC(=O)C3=CC(=CC=C3)C(F)(F)F	0.642916	0.851952	1772.77
Unii-S3abp24K72	CC(C)(C)[C@H](C(=O)N)NC(=O)C1=CN(C2=CC=CC=C21)CC3=CC=C(C=C3)F	0.71002	0.908924	1933.6
1-(3,4-Difluorophenyl)-3-(5-methyl-2-phenylpyrazol-3-yl)urea	CC1=NN(C(=C1)NC(=O)NC2=CC(=C(C=C2)F)F)C3=CC=CC=C3	0.760206	0.921306	1433
2-[(2R,3R)-1-(4-Chlorobenzoyl)-2-methyl-2,3-dihydroindol-3-yl]-N-octylacetamide	CCCCCCCCNC(=O)C[C@H]1[C@H](N(C2=CC=CC=C12)C(=O)C3=CC=C(C=C3)Cl)C	0.437991	0.738446	2256.03
3-[(E)-3-(4-Methoxyphenyl)prop-2-enoyl]-4-phenyl-1H-quinolin-2-one	COC1=CC=C(C=C1)/C=C/C(=O)C2=C(C3=CC=CC=C3NC2=O)C4=CC=CC=C4	0.386451	0.963146	2145.2
Losmapimod	CC1=C(C=C(C=C1F)C(=O)NC2CC2)C3=NC=C(C=C3)C(=O)NCC(C)(C)C	0.823484	0.906579	1863.41
Torin 1	CCC(=O)N1CCN(CC1)C2=C(C=C(C=C2)N3C(=O)C=CC4=CN=C5C=CC(=CC5=C43)C6=CC7=CC=CC=C7N=C6)C(F)(F)F	0.205585	0.637419	3534.12
7-((Carboxy(4-hydroxyphenyl)acetyl)amino)-7-methoxy-(3-((1-methyl-1H-tetrazol-5-YL)thio)methyl)-8-oxo-5-oxa-1-azabicyclo[4.2.0]oct-2-ene-2-carboxylic acid	CN1C(=NN=N1)SCC2=C(N3[C@@H]([C@@](C3=O)(NC(=O)[C@@H](C4=CC=C(C=C4)O)C(=O)O)OC)OC2)C(=O)O	0.133795	0.432768	2019.25
Doxofylline	CN1C2=C(C(=O)N(C1=O)C)N(C=N2)CC3OCCO3	0.6823	1	1235.52
Nida-41020	CC1=C(N(N=C1C(=O)NN2CCCCC2)C3=C(C=C(C=C3)Cl)Cl)C4=CC=C(C=C4)OC	0.563217	0.818788	2024.08
(1S-Endo)-5-(4-Chloro-3-methylphenyl)-1-((4-methylphenyl)methyl)-N-(1,3,3-trimethylbicyclo(2.2.1)hept-2-yl)-1H-pyrazole-3-carboxamide	CC1=CC=C(C=C1)CN2C(=CC(=N2)C(=O)N[C@H]3[C@]4(CC[C@H](C4)C3(C)C)C)C5=CC(=C(C=C5)Cl)C	0.440015	0.645939	2609.1
N-[(2R)-1-Amino-3,3-dimethyl-1-oxobutan-2-yl]-1-[(4S)-4-hydroxypentyl]indazole-3-carboxamide	C[C@@H](CCCN1C2=CC=CC=C2C(=N1)C(=O)N[C@@H](C(=O)N)C(C)(C)C)O	0.699336	0.824215	1770.99
Ibutamoren	CC(C)(C(=O)N[C@H](COCC1=CC=CC=C1)C(=O)N2CCC3(CC2)CN(C4=CC=CC=C34)S(=O)(=O)C)N	0.538586	0.638221	2699.28
(7-(6-Aminopyridin-3-yl)-2,3-dihydrobenzo[f][1,4]oxazepin-4(5H)-yl)(3-fluoro-2-methyl-4-(methylsulfonyl)phenyl)methanone	CC1=C(C=CC(=C1F)S(=O)(=O)C)C(=O)N2CCOC3=C(C2)C=C(C=C3)C4=CN=C(C=C4)N	0.650639	0.815976	2242.59
PF-477736	CN1C=C(C=N1)C2=C3C=NNC(=O)C4=C3C(=CC(=C4)NC(=O)[C@@H](C5CCCCC5)N)N2	0.517439	0.630936	2228.35
N,N'-Di[4-(4-Methyl-pyrimidin-2-ylsulfamoyl)phenyl]-urea	CC1=NC(=NC=C1)NS(=O)(=O)C2=CC=C(C=C2)NC(=O)NC3=CC=C(C=C3)S(=O)(=O)NC4=NC=CC(=N4)C	0.253868	0.429431	2465.34
Tert-Butyl (4-(3-((7-(hydroxyamino)-7-oxoheptyl)carbamoyl)isoxazol-5-yl)phenyl)carbamate	CC(C)(C)OC(=O)NC1=CC=C(C=C1)C2=CC(=NO2)C(=O)NCCCCCCC(=O)NO	0.246344	0.540333	2009.62
Sonepiprazole	C1CO[C@H](C2=CC=CC=C21)CCN3CCN(CC3)C4=CC=C(C=C4)S(=O)(=O)N	0.830956	0.933893	2032.38
Tolterodine	CC1=CC(=C(C=C1)O)[C@H](CCN(C(C)C)C(C)C)C2=CC=CC=C2	0.74234	0.907309	1716.45
3-Hexanoyl-NBD Cholesterol	C[C@H](CCCC(C)C)[C@H]1CC[C@@H]2[C@@]1(CC[C@H]3[C@H]2CC=C4[C@@]3(CC[C@@H](C4)OC(=O)CCCCCNC5=CC=C(C6=NON=C56)[N+](=O)[O-])C)C	0.069751	0.49623	3988.72
1-(Tert-Butyl)-3-(2-((4-(diethylamino)butyl)amino)-6-(3,5-dimethoxyphenyl)pyrido[2,3-d]pyrimidin-7-yl)urea	CCN(CC)CCCCNC1=NC2=NC(=C(C=C2C=N1)C3=CC(=CC(=C3)OC)OC)NC(=O)NC(C)(C)C	0.278988	0.614179	2701.81
2-[(2R,3S)-1-(4-Chlorobenzoyl)-2-methyl-2,3-dihydroindol-3-yl]-N-octylacetamide	CCCCCCCCNC(=O)C[C@@H]1[C@H](N(C2=CC=CC=C12)C(=O)C3=CC=C(C=C3)Cl)C	0.437991	0.738446	2256.03
7-[(1S,2R,5R)-5-Hydroxy-3-methylidene-2-(3-oxooctyl)cyclopentyl]heptanoic acid	CCCCCC(=O)CC[C@@H]1[C@@H]([C@@H](CC1=C)O)CCCCCCC(=O)O	0.344499	0.921306	1769.04
JWH 081 8-methoxynaphthyl isomer	CCCCCN1C=C(C2=CC=CC=C21)C(=O)C3=CC=CC4=C3C(=CC=C4)OC	0.284976	0.872564	2219.82
Entospletinib	C1COCCN1C2=CC=C(C=C2)NC3=NC(=CN4C3=NC=C4)C5=CC6=C(C=C5)C=NN6	0.467385	0.85974	2317.85
N-Cyclopropyl-5-(thiophen-2-yl)isoxazole-3-carboxamide	C1CC1NC(=O)C2=NOC(=C2)C3=CC=CS3	0.886084	0.976499	908.464
Dactolisib	CC(C)(C#N)C1=CC=C(C=C1)N2C3=C4C=C(C=CC4=NC=C3N(C2=O)C)C5=CC6=CC=CC=C6N=C5	0.32363	0.771913	2945.65
N-[4-[(2S)-3-[[2-(3,4-Dichlorophenyl)ethyl]amino]-2-hydroxypropoxy]phenyl]-methanesulfonamide	CS(=O)(=O)NC1=CC=C(C=C1)OC[C@H](CNCCC2=CC(=C(C=C2)Cl)Cl)O	0.501874	0.75965	1700.36
4-(4-Fluorophenyl)-2-(4-hydroxyphenyl)-5-(4-pyridyl)imidazole	C1=CC(=CC=C1C2=NC(=C(N2)C3=CC=NC=C3)C4=CC=C(C=C4)F)O	0.574239	0.921306	1622.63
2-Methyl-2-(4-(2-oxo-9-(quinolin-3-yl)-2,4-dihydro-1H-[1,3]oxazino[5,4-c]quinolin-1-yl)phenyl)propanenitrile	CC(C)(C#N)C1=CC=C(C=C1)N2C3=C4C=C(C=CC4=NC=C3COC2=O)C5=CC6=CC=CC=C6N=C5	0.282518	0.661645	2715.47
9,12-Octadecadiynoic acid	CCCCCC#CCC#CCCCCCCCC(=O)O	0.460367	0.974685	1343.79
Rociletinib	CC(=O)N1CCN(CC1)C2=CC(=C(C=C2)NC3=NC=C(C(=N3)NC4=CC(=CC=C4)NC(=O)C=C)C(F)(F)F)OC	0.340675	0.619806	2593.53
Oxandrolone	C[C@]12CC[C@H]3[C@H]([C@@H]1CC[C@]2(C)O)CC[C@@H]4[C@@]3(COC(=O)C4)C	0.696291	0.976499	1590.27
Nvp-tnks656	COC1=CC=C(C=C1)C(=O)C2CCN(CC2)CC(=O)N(CC3CC3)CC4=NC5=C(COCC5)C(=O)N4	0.532984	0.769654	2585.33
N-Tert-butyl-3-[(5-methyl-2-{[4-(4-methylpiperazin-1-yl)phenyl]amino}pyrimidin-4-yl)amino]benzenesulfonamide	CC1=CN=C(N=C1NC2=CC(=CC=C2)S(=O)(=O)NC(C)(C)C)NC3=CC=C(C=C3)N4CCN(CC4)C	0.437554	0.657232	2653.6
(7-Methoxynaphthalen-1-yl)(1-pentyl-1H-indol-3-yl)methanone	CCCCCN1C=C(C2=CC=CC=C21)C(=O)C3=CC=CC4=C3C=C(C=C4)OC	0.284976	0.872564	2228.07
JWH 250 N-(5-hydroxypentyl) metabolite	COC1=CC=CC=C1CC(=O)C2=CN(C3=CC=CC=C32)CCCCCO	0.463362	0.976499	1926.17
Taselisib	CC1=NN(C(=N1)C2=CN3CCOC4=C(C3=N2)C=CC(=C4)C5=CN(N=C5)C(C)(C)C(=O)N)C(C)C	0.488602	0.752303	2452.4
(2R,3R,4R,5R)-2-(5-Amino-7-methyl-2,6,7,9,11-pentazatricyclo[6.3.1.04,12]dodeca-1(12),3,5,8,10-pentaen-2-yl)-5-(hydroxymethyl)oxolane-3,4-diol	CN1C2=NC=NC3=C2C(=CN3[C@H]4[C@@H]([C@H]([C@H](O4)CO)O)O)C(=N1)N	0.503084	0.670954	1370.49
Andarine	CC(=O)NC1=CC=C(C=C1)OC[C@@](C)(C(=O)NC2=CC(=C(C=C2)[N+](=O)[O-])C(F)(F)F)O	0.446248	0.624003	1690.52
1-(3,3-Dimethylbutyl)-3-(2-fluoro-4-methyl-5-(7-methyl-2-(methylamino)pyrido[2,3-d]pyrimidin-6-yl)phenyl)urea	CC1=CC(=C(C=C1C2=C(N=C3C(=C2)C=NC(=N3)NC)C)NC(=O)NCCC(C)(C)C)F	0.533209	0.776513	2151.24
(2R,3S,4S,5R)-2-(5-Amino-7-methyl-2,6,7,9,11-pentazatricyclo[6.3.1.04,12]dodeca-1(12),3,5,8,10-pentaen-2-yl)-5-(hydroxymethyl)oxolane-3,4-diol	CN1C2=NC=NC3=C2C(=CN3[C@H]4[C@H]([C@@H]([C@H](O4)CO)O)O)C(=N1)N	0.503084	0.670954	1370.49
Methyl (2S)-2-[[1-[(4R)-4-fluoropentyl]indazole-3-carbonyl]amino]-3-methylbutanoate	C[C@H](CCCN1C2=CC=CC=C2C(=N1)C(=O)N[C@@H](C(C)C)C(=O)OC)F	0.731622	0.976172	1741.63
Clobetasol propionate	CCC(=O)O[C@@]1([C@H](C[C@@H]2[C@@]1(C[C@@H]([C@]3([C@H]2CCC4=CC(=O)C=C[C@@]43C)F)O)C)C)C(=O)CCl	0.497959	0.817307	2169.39
Isoquinolin-4-yl1-(cyclohexylmethyl)-1H-indole-3-carboxylate	C1CCC(CC1)CN2C=C(C3=CC=CC=C32)C(=O)OC4=CN=CC5=CC=CC=C54	0.406038	0.906669	2265.39
Phytol	C[C@@H](CCC[C@@H](C)CCC/C(=C/CO)/C)CCCC(C)C	0.391756	0.778081	1608.56
Azd-8186	C[C@H](C1=CC(=CC2=C1OC(=CC2=O)N3CCOCC3)C(=O)N(C)C)NC4=CC(=CC(=C4)F)F	0.628657	0.829943	2221.45
[1-[(4S)-5-Fluoro-4-hydroxypentyl]indol-3-yl]-naphthalen-1-ylmethanone	C1=CC=C2C(=C1)C=CC=C2C(=O)C3=CN(C4=CC=CC=C43)CCC[C@@H](CF)O	0.454776	0.96814	2131.52
5-[(3R)-Dithiolan-3-yl]-N-[3-[5-[(3R)-dithiolan-3-yl]pentanoylamino]propyl]pentanamide	C1CSS[C@@H]1CCCCC(=O)NCCCNC(=O)CCCC[C@@H]2CCSS2	0.285636	0.78487	1630.73
Cholesterol margarate	CCCCCCCCCCCCCCCCC(=O)O[C@H]1CC[C@@]2([C@H]3CC[C@]4([C@H]([C@@H]3CC=C2C1)CC[C@@H]4[C@H](C)CCCC(C)C)C)C	0.0710078	0.558179	4188.23
Isopropyl 4-(1-(2-fluoro-4-(methylsulfonyl)phenyl)-1H-pyrazolo[3,4-d]pyrimidin-4-yloxy)piperidine-1-carboxylate	CC(C)OC(=O)N1CCC(CC1)OC2=NC=NC3=C2C=NN3C4=C(C=C(C=C4)S(=O)(=O)C)F	0.550748	0.764729	2219.24
5-[(3S)-Dithiolan-3-yl]-N-[3-[5-[(3R)-dithiolan-3-yl]pentanoylamino]propyl]pentanamide	C1CSS[C@H]1CCCCC(=O)NCCCNC(=O)CCCC[C@@H]2CCSS2	0.285636	0.78487	1630.73
Erythromycin A enol ether	CC[C@@H]1[C@@]([C@@H]([C@H](C2=C(C[C@@](O2)([C@@H]([C@H]([C@@H]([C@H](C(=O)O1)C)O[C@H]3C[C@@]([C@H]([C@@H](O3)C)O)(C)OC)C)O[C@H]4[C@@H]([C@H](C[C@H](O4)C)N(C)C)O)C)C)C)O)(C)O	0.284818	0.435257	3696.34
Tenovin-1	CC(=O)NC1=CC=C(C=C1)NC(=S)NC(=O)C2=CC=C(C=C2)C(C)(C)C	0.713493	0.862444	1618.07
Carfilzomib	CC(C)C[C@@H](C(=O)[C@]1(CO1)C)NC(=O)[C@H](CC2=CC=CC=C2)NC(=O)[C@H](CC(C)C)NC(=O)[C@H](CCC3=CC=CC=C3)NC(=O)CN4CCOCC4	0.152234	0.441855	3916.76
Cyclopamine	C[C@H]1C[C@@H]2[C@H]([C@H]([C@]3(O2)CC[C@H]4[C@@H]5CC=C6C[C@H](CC[C@@]6([C@H]5CC4=C3C)C)O)C)NC1	0.551165	0.859421	2427.44
JWH 210 5-ethylnaphthyl isomer	CCCCCN1C=C(C2=CC=CC=C21)C(=O)C3=CC=CC4=C(C=CC=C43)CC	0.259906	0.772061	2309.63
N-(12-Cyanoindolizino[2,3-b]quinoxalin-2-yl)thiophene-2-carboxamide	C1=CC=C2C(=C1)N=C3C(=C4C=C(C=CN4C3=N2)NC(=O)C5=CC=CS5)C#N	0.504887	0.974055	1944.82
Cdk1/2 Inhibitor III	C1=CC(=C(C(=C1)F)NC(=S)N2C(=NC(=N2)NC3=CC=C(C=C3)S(=O)(=O)N)N)F	0.463679	0.584675	1634.32
(E)-N-[2-(2-Methylindol-1-yl)ethyl]-3-(3,4,5-trimethoxyphenyl)prop-2-enamide	CC1=CC2=CC=CC=C2N1CCNC(=O)/C=C/C3=CC(=C(C(=C3)OC)OC)OC	0.590481	0.946072	2028.48
7-[trans-4-(4-Methylpiperazin-1-Yl)cyclohexyl]-5-(4-Phenoxyphenyl)-7h-Pyrrolo[2,3-D]pyrimidin-4-Amine	CN1CCN(CC1)C2CCC(CC2)N3C=C(C4=C(N=CN=C43)N)C5=CC=C(C=C5)OC6=CC=CC=C6	0.421348	0.797154	2757.31
Platensimycin	C[C@]12C[C@]34C[C@H]1C[C@@H]([C@H]3[C@](C(=O)C=C4)(C)CCC(=O)NC5=C(C=CC(=C5O)C(=O)O)O)O2	0.515631	0.577659	2136.52
Naphthalen-1-yl(5-(naphthalen-1-yl)-1-pentyl-1H-pyrrol-3-yl)methanone	CCCCCN1C=C(C=C1C2=CC=CC3=CC=CC=C32)C(=O)C4=CC=CC5=CC=CC=C54	0.194903	0.662785	2673.55
N1-(3-Acetamidophenyl)-N2-(2-(4-methyl-2-(p-tolyl)thiazol-5-yl)ethyl)oxalamide	CC1=CC=C(C=C1)C2=NC(=C(S2)CCNC(=O)C(=O)NC3=CC=CC(=C3)NC(=O)C)C	0.513289	0.742372	2061.53
7-[(1R,2R,5S)-5-Hydroxy-3-methylidene-2-(3-oxooctyl)cyclopentyl]heptanoic acid	CCCCCC(=O)CC[C@@H]1[C@H]([C@H](CC1=C)O)CCCCCCC(=O)O	0.344499	0.921306	1769.04
N-[(2S)-1-Amino-3,3-dimethyl-1-oxobutan-2-yl]-1-(5-hydroxypentyl)indazole-3-carboxamide	CC(C)(C)[C@@H](C(=O)N)NC(=O)C1=NN(C2=CC=CC=C21)CCCCCO	0.623735	0.824215	1772.5
Flt-3 inhibitor	COC1=C(C=C(C=C1)C(=O)NC2=C(C3=C(S2)CCCC3)C(=O)N)OC	0.857474	0.921254	1562.34
5-OH-Jwh-018	C1=CC=C2C(=C1)C=CC=C2C(=O)C3=CN(C4=CC=CC=C43)CCCCCO	0.365326	0.972992	2127.1
JWH 018 7-hydroxyindole metabolite	CCCCCN1C=C(C2=C1C(=CC=C2)O)C(=O)C3=CC=CC4=CC=CC=C43	0.343601	0.907332	2121.59
(3-Chlorophenyl)-[(1R)-6,7-dimethoxy-1-[(4-methoxyphenoxy)methyl]-3,4-dihydro-1H-isoquinolin-2-yl]methanone	COC1=CC=C(C=C1)OC[C@H]2C3=CC(=C(C=C3CCN2C(=O)C4=CC(=CC=C4)Cl)OC)OC	0.478636	0.836269	2196.01
Mubritinib	C1=CC(=CC=C1CCCCN2C=CN=N2)OCC3=COC(=N3)/C=C/C4=CC=C(C=C4)C(F)(F)F	0.26491	0.753389	2262.38
3-[(4-Ethyl-1-naphthalenyl)carbonyl]-1H-indole-1-pentanoicacid	CCC1=CC=C(C2=CC=CC=C12)C(=O)C3=CN(C4=CC=CC=C43)CCCCC(=O)O	0.298911	0.877764	2340.24
Pyrintegrin	C1CC2=C(C=CC(=C2)O)N(C1)C3=NC(=NC=C3)NC4=CC=C(C=C4)S(=O)(=O)NCC5CC5	0.502699	0.696242	2317.32
(S)-2-(1-((4-Hydroxycyclohexyl)methyl)-1H-indazole-3-carboxamido)-3,3-dimethylbutanoicacid	CC(C)(C)[C@@H](C(=O)O)NC(=O)C1=NN(C2=CC=CC=C21)CC3CCC(CC3)O	0.731724	0.823111	1916.79
N-[(2S)-1-Amino-3-methyl-1-oxobutan-2-yl]-1-[(2R)-2-fluoropentyl]indazole-3-carboxamide	CCC[C@H](CN1C2=CC=CC=C2C(=N1)C(=O)N[C@@H](C(C)C)C(=O)N)F	0.767476	0.921306	1678.92
Tazarotenic acid	CC1(CCSC2=C1C=C(C=C2)C#CC3=NC=C(C=C3)C(=O)O)C	0.807338	0.976499	1471.47
7-[(1R,2R,5R)-5-Hydroxy-3-methylidene-2-(3-oxooctyl)cyclopentyl]heptanoic acid	CCCCCC(=O)CC[C@@H]1[C@H]([C@@H](CC1=C)O)CCCCCCC(=O)O	0.344499	0.921306	1769.04
(6R)-5-Methyltetrahydrofolic acid	CN1[C@@H](CNC2=C1C(=O)NC(=N2)N)CNC3=CC=C(C=C3)C(=O)N[C@@H](CCC(=O)O)C(=O)O	0.260222	0.451226	2071.83
(3S)-7-[(1R,2S,3R,5S)-3,5-Dihydroxy-2-[(E,3R)-3-hydroxyoct-1-enyl]cyclopentyl]-3-methoxyheptanoic acid	CCCCC[C@H](/C=C/[C@@H]1[C@@H](C[C@@H]([C@@H]1CCCC[C@@H](CC(=O)O)OC)O)O)O	0.270075	0.778066	1839.08
(S)-Closantel	CC1=CC(=C(C=C1NC(=O)C2=C(C(=CC(=C2)I)I)O)Cl)[C@@H](C#N)C3=CC=C(C=C3)Cl	0.292357	0.542249	1772.24
Farnesyl Thiosalicylic Acid Amide	CC(=CCC/C(=C/CC/C(=C/CSC1=CC=CC=C1C(=O)N)/C)/C)C	0.394409	0.862769	1784.87
N-(1-(4-Fluorobenzyl)-1H-indole-3-ylcarbonyl)-3-methyl-Val-NH2	CC(C)(C)[C@@H](C(=O)N)NC(=O)C1=CN(C2=CC=CC=C21)CC3=CC=C(C=C3)F	0.71002	0.908924	1933.6
3-[Bis(4-methoxyphenyl)methylidene]-1H-indol-2-one	COC1=CC=C(C=C1)C(=C2C3=CC=CC=C3NC2=O)C4=CC=C(C=C4)OC	0.69353	0.976499	1735.14
Dabrafenib	CC(C)(C)C1=NC(=C(S1)C2=NC(=NC=C2)N)C3=C(C(=CC=C3)NS(=O)(=O)C4=C(C=CC=C4F)F)F	0.367049	0.671298	2286.33
(4-Tert-butylpiperidin-1-yl)-[4-[hydroxy(diphenyl)methyl]triazol-2-yl]methanone	CC(C)(C)C1CCN(CC1)C(=O)N2N=CC(=N2)C(C3=CC=CC=C3)(C4=CC=CC=C4)O	0.688832	0.900755	2116.3
Methyl 7-[(1R,2R,3R,5S)-2-[(3R)-4-(2-fluorophenyl)sulfanyl-3-hydroxybutyl]-3,5-dihydroxycyclopentyl]heptanoate	COC(=O)CCCCCC[C@H]1[C@H](C[C@H]([C@@H]1CC[C@H](CSC2=CC=CC=C2F)O)O)O	0.243765	0.742477	1999.44
Quinolin-8-yl 1-[(4R)-4-hydroxypentyl]indole-3-carboxylate	C[C@H](CCCN1C=C(C2=CC=CC=C21)C(=O)OC3=CC=CC4=C3N=CC=C4)O	0.396589	0.97079	2099.85
N-[(2R)-3-Carbazol-9-yl-2-hydroxypropyl]-N-(furan-2-ylmethyl)methanesulfonamide	CS(=O)(=O)N(CC1=CC=CO1)C[C@@H](CN2C3=CC=CC=C3C4=CC=CC=C42)O	0.518673	0.939315	2114.62
Methyl palmitate	CCCCCCCCCCCCCCCC(=O)OC	0.301398	0.921064	1357.52
Fumitremorgin C	CC(=C[C@H]1C2=C(C[C@@H]3N1C(=O)[C@@H]4CCCN4C3=O)C5=C(N2)C=C(C=C5)OC)C	0.816191	0.966252	2027.08
(3S)-7-[(1R,2S,3R,5S)-3,5-Dihydroxy-2-[(E,3S)-3-hydroxyoct-1-enyl]cyclopentyl]-3-methoxyheptanoic acid	CCCCC[C@@H](/C=C/[C@@H]1[C@@H](C[C@@H]([C@@H]1CCCC[C@@H](CC(=O)O)OC)O)O)O	0.270075	0.778066	1839.08
AP-III-a4	C1CCC(CC1)CNC2=NC(=NC(=N2)NCC3=CC=C(C=C3)F)NC4=CC=C(C=C4)CC(=O)NCCOCCOCCN	0.136849	0.439071	3073.49
Retapamulin	C[C@@H]1CC[C@@]23CCC(=O)[C@H]2[C@@]1([C@@H](C[C@@]([C@H]([C@@H]3C)O)(C)C=C)OC(=O)CSC4C[C@H]5CC[C@@H](C4)N5C)C	0.396826	0.776585	2749.92
N-[2-(3-Oxo-4H-quinoxalin-2-yl)-4-propan-2-ylphenyl]-2-thiophenecarboxamide	CC(C)C1=CC(=C(C=C1)NC(=O)C2=CC=CS2)C3=NC4=CC=CC=C4NC3=O	0.514111	0.898491	2052.81
10,10-Bis(pyridin-4-ylmethyl)anthracen-9-one	C1=CC=C2C(=C1)C(=O)C3=CC=CC=C3C2(CC4=CC=NC=C4)CC5=CC=NC=C5	0.514136	0.992615	1978.68
Lenvatinib	COC1=CC2=NC=CC(=C2C=C1C(=O)N)OC3=CC(=C(C=C3)NC(=O)NC4CC4)Cl	0.549037	0.71151	1898.24
(R)-N-((1-((4-Chlorophenyl)amino)-1-oxopropan-2-yl)oxy)-3,5-bis(trifluoromethyl)benzamide	C[C@H](C(=O)NC1=CC=C(C=C1)Cl)ONC(=O)C2=CC(=CC(=C2)C(F)(F)F)C(F)(F)F	0.489677	0.778342	1434.72
Eprotirome	CC(C)C1=C(C=CC(=C1)OC2=C(C=C(C=C2Br)NC(=O)CC(=O)O)Br)O	0.484573	0.676366	1436.3
3-Acetyl-beta-boswellic acid	C[C@@H]1CC[C@@]2(CC[C@@]3(C(=CC[C@H]4[C@]3(CC[C@@H]5[C@@]4(CC[C@H]([C@]5(C)C(=O)O)OC(=O)C)C)C)[C@@H]2[C@H]1C)C)C	0.313445	0.596109	2905.08
3-[2-N-(Biotinyl)aminoethyldithio]propanoic Acid	C1[C@H]2[C@@H]([C@@H](S1)CCCCC(=O)NCCSSCCC(=O)O)NC(=O)N2	0.221451	0.741714	1419.4
3'-Carbamoyl-6-hydroxybiphenyl-3-yl cyclohexylcarbamate	C1CCC(CC1)NC(=O)OC2=CC(=C(C=C2)O)C3=CC(=CC=C3)C(=O)N	0.780795	0.850405	1681.5
JWH 210 6-ethylnaphthyl isomer	CCCCCN1C=C(C2=CC=CC=C21)C(=O)C3=CC=CC4=C3C=CC(=C4)CC	0.259906	0.772061	2309.63
7-[(1S,2R,5S)-5-Hydroxy-3-methylidene-2-(3-oxooctyl)cyclopentyl]heptanoic acid	CCCCCC(=O)CC[C@@H]1[C@@H]([C@H](CC1=C)O)CCCCCCC(=O)O	0.344499	0.921306	1769.04
(1r,4r)-4-(2-(Butylamino)-5-(4-((4-methylpiperazin-1-yl)methyl)phenyl)-7H-pyrrolo[2,3-d]pyrimidin-7-yl)cyclohexanol	CCCCNC1=NC=C2C(=CN(C2=N1)C3CCC(CC3)O)C4=CC=C(C=C4)CN5CCN(CC5)C	0.465612	0.751505	2723.1
1-(4-(4-Amino-5-(3-methoxyphenyl)-7H-pyrrolo[2,3-d]pyrimidin-7-yl)phenethyl)piperidin-4-ol	COC1=CC=CC(=C1)C2=CN(C3=NC=NC(=C23)N)C4=CC=C(C=C4)CCN5CCC(CC5)O	0.472599	0.797157	2459.5
Triciribine	CN1C2=NC=NC3=C2C(=CN3[C@H]4[C@@H]([C@@H]([C@H](O4)CO)O)O)C(=N1)N	0.503084	0.670954	1370.49
JWH 073 2-methylnaphthyl analog	CCCCN1C=C(C2=CC=CC=C21)C(=O)C3=C(C=CC4=CC=CC=C43)C	0.399957	0.838538	2101.91
2-(4-Ethylpiperazin-1-yl)-N-[4-(2-morpholin-4-yl-4-oxochromen-8-yl)dibenzothiophen-1-yl]acetamide	CCN1CCN(CC1)CC(=O)NC2=C3C4=CC=CC=C4SC3=C(C=C2)C5=CC=CC6=C5OC(=CC6=O)N7CCOCC7	0.293449	0.771002	3369.44
(S)-N-(3-(3,4-Dihydroisoquinolin-2(1H)-yl)-2-hydroxypropyl)-6-(oxetan-3-ylamino)pyrimidine-4-carboxamide	C1CN(CC2=CC=CC=C21)C[C@H](CNC(=O)C3=CC(=NC=N3)NC4COC4)O	0.63782	0.840219	1862.12
ROR gamma-t-IN-1	CCS(=O)(=O)C1=CC=C(C=C1)CC(=O)NC2=CC(=C(C(=C2)Cl)C3=CC=CC=C3OC(F)(F)F)Cl	0.375579	0.641413	2090.61
Mifepristone	CC#C[C@@]1(CC[C@@H]2[C@@]1(C[C@@H](C3=C4CCC(=O)C=C4CC[C@@H]23)C5=CC=C(C=C5)N(C)C)C)O	0.639526	0.862687	2449.8
1-Tert-Butyl-3-(3-Methylbenzyl)-1h-Pyrazolo[3,4-D]pyrimidin-4-Amine	CC1=CC(=CC=C1)CC2=NN(C3=NC=NC(=C23)N)C(C)(C)C	0.788536	0.976499	1538.98
N-[(2s)-3-(9h-Carbazol-9-Yl)-2-Hydroxypropyl]-N-(Furan-2-Ylmethyl)methanesulfonamide	CS(=O)(=O)N(CC1=CC=CO1)C[C@H](CN2C3=CC=CC=C3C4=CC=CC=C42)O	0.518673	0.939315	2114.62
(1-Hexyl-1H-indol-3-yl)(naphthalen-1-yl)methanone	CCCCCCN1C=C(C2=CC=CC=C21)C(=O)C3=CC=CC4=CC=CC=C43	0.270082	0.788488	2202.72
Src Kinase Inhibitor I	COC1=C(C=C2C(=C1)C(=NC=N2)NC3=CC=C(C=C3)OC4=CC=CC=C4)OC	0.502119	0.968247	1888.6
[(3R)-3-Aminopiperidin-1-yl]-[1-methyl-2-(1-methylindol-2-yl)benzimidazol-5-yl]methanone	CN1C2=C(C=C(C=C2)C(=O)N3CCC[C@H](C3)N)N=C1C4=CC5=CC=CC=C5N4C	0.573779	0.956576	2282.85
25B-NBOMe	COC1=CC=CC=C1CNCCC2=CC(=C(C=C2OC)Br)OC	0.707481	0.965373	1466.08
Schembl20970899	COC1=CC(=C(C=C1CCNCC2=CC=CC=C2F)OC)Cl	0.78555	0.955121	1330.21
Ethyl 4-[5-[(2-ethoxypyrimidin-5-yl)methyl]-2-[(4-fluorophenyl)methylsulfanyl]-4-oxopyrimidin-1-yl]benzoate	CCOC1=NC=C(C=N1)CC2=CN(C(=NC2=O)SCC3=CC=C(C=C3)F)C4=CC=C(C=C4)C(=O)OCC	0.169823	0.80134	2500.79
Quinolin-7-yl1-(cyclohexylmethyl)-1H-indole-3-carboxylate	C1CCC(CC1)CN2C=C(C3=CC=CC=C32)C(=O)OC4=CC5=C(C=CC=N5)C=C4	0.320619	0.906669	2265.39
5-[4-(4-Cyanobut-1-yn-1-yl)phenyl]-1-(2,4-dichlorophenyl)-N-(1,1-dioxo-1lambda~6~,4-thiazinan-4-yl)-4-methyl-1H-pyrazole-3-carboxamide	CC1=C(N(N=C1C(=O)NN2CCS(=O)(=O)CC2)C3=C(C=C(C=C3)Cl)Cl)C4=CC=C(C=C4)C#CCCC#N	0.373279	0.744191	2503.06
4-Cyano-N-(1,3-dimethyl-2-oxo-1,2-dihydroquinolin-6-yl)-2-methoxybenzenesulfonamide	CC1=CC2=C(C=CC(=C2)NS(=O)(=O)C3=C(C=C(C=C3)C#N)OC)N(C1=O)C	0.745951	0.948378	1939.9
Omarigliptin	CS(=O)(=O)N1C=C2CN(CC2=N1)[C@@H]3C[C@@H]([C@H](OC3)C4=C(C=CC(=C4)F)F)N	0.834052	0.939378	1773.74
4-[4-(4-Fluorophenyl)-2-(4-methylsulfonylphenyl)-1H-imidazol-5-yl]pyridine	CS(=O)(=O)C1=CC=C(C=C1)C2=NC(=C(N2)C3=CC=NC=C3)C4=CC=C(C=C4)F	0.55932	0.947725	1943.17
1-(4-Chlorophenyl)-N-(3-cyano-4-(4-morpholinopiperidin-1-yl)phenyl)-5-methyl-1H-pyrazole-4-carboxamide	CC1=C(C=NN1C2=CC=C(C=C2)Cl)C(=O)NC3=CC(=C(C=C3)N4CCC(CC4)N5CCOCC5)C#N	0.55845	0.787275	2501.86
3-Bromo-N-[3-(Tert-Butylamino)propyl]benzamide	CC(C)(C)NCCCNC(=O)C1=CC(=CC=C1)Br	0.820734	0.921306	1056.54
4-[(5,5-Dimethyl-8-quinolin-3-yl-6H-naphthalene-2-carbonyl)amino]benzoic acid	CC1(CC=C(C2=C1C=CC(=C2)C(=O)NC3=CC=C(C=C3)C(=O)O)C4=CC5=CC=CC=C5N=C4)C	0.384039	0.674762	2518.39
2-(4-Bromo-2-chlorophenoxy)-N-[[4-[(4,6-dimethylpyrimidin-2-yl)sulfamoyl]phenyl]carbamothioyl]acetamide	CC1=CC(=NC(=N1)NS(=O)(=O)C2=CC=C(C=C2)NC(=S)NC(=O)COC3=C(C=C(C=C3)Br)Cl)C	0.35335	0.577092	2065.32
(3-Ethylnaphthalen-1-yl)(1-pentyl-1H-indol-3-yl)methanone	CCCCCN1C=C(C2=CC=CC=C21)C(=O)C3=CC(=CC4=CC=CC=C43)CC	0.259906	0.772061	2309.63
3,4-Dimethoxy-N-(4-(3-nitrophenyl)thiazol-2-yl)benzenesulfonamide	COC1=C(C=C(C=C1)S(=O)(=O)NC2=NC(=CS2)C3=CC(=CC=C3)[N+](=O)[O-])OC	0.457402	0.8135	1757.57
Doxazosin, (S)-	COC1=C(C=C2C(=C1)C(=NC(=N2)N3CCN(CC3)C(=O)[C@@H]4COC5=CC=CC=C5O4)N)OC	0.633464	0.790882	2203.41
6-(2-Chloro-4-(6-methylpyrazin-2-yl)phenyl)-8-ethyl-2-((2-(1-methylpiperidin-4-yl)ethyl)amino)pyrido[2,3-d]pyrimidin-7(8H)-one	CCN1C2=NC(=NC=C2C=C(C1=O)C3=C(C=C(C=C3)C4=NC(=CN=C4)C)Cl)NCCC5CCN(CC5)C	0.367026	0.782554	2796.22
N-[(2R)-1-Amino-3-methyl-1-oxobutan-2-yl]-1-[(4R)-4-hydroxypentyl]indazole-3-carboxamide	C[C@H](CCCN1C2=CC=CC=C2C(=N1)C(=O)N[C@H](C(C)C)C(=O)N)O	0.671421	0.824221	1697.94
(R)-Closantel	CC1=CC(=C(C=C1NC(=O)C2=C(C(=CC(=C2)I)I)O)Cl)[C@H](C#N)C3=CC=C(C=C3)Cl	0.292357	0.542249	1772.24
(S)-5-(3-Fluorophenyl)-N-(piperidin-3-yl)-3-ureidothiophene-2-carboxamide	C1C[C@@H](CNC1)NC(=O)C2=C(C=C(S2)C3=CC(=CC=C3)F)NC(=O)N	0.672859	0.82261	1523.39
(E)-7-[(1R,2R,3S,5S)-3,5-Dihydroxy-2-[(3R)-3-hydroxy-5-phenylpentyl]cyclopentyl]hept-5-enoic acid	C1[C@@H]([C@@H]([C@H]([C@H]1O)C/C=C/CCCC(=O)O)CC[C@H](CCC2=CC=CC=C2)O)O	0.324178	0.795828	1954.93
3'-Carbamoyl-biphenyl-3-yl-undecynecarbamate	C#CCCCCCCCCCNC(=O)OC1=CC=CC(=C1)C2=CC(=CC=C2)C(=O)N	0.370856	0.860863	2137.79
6,7-Dichloro-N-cyclopentyl-4-(pyridin-4-yl)phthalazin-1-amine	C1CCC(C1)NC2=NN=C(C3=CC(=C(C=C32)Cl)Cl)C4=CC=NC=C4	0.684607	0.964412	1544.54
N-Acetyl-S-geranylgeranyl-L-cysteine	CC(=CCC/C(=C/CC/C(=C/CC/C(=C/CSC[C@@H](C(=O)O)NC(=O)C)/C)/C)/C)C	0.228906	0.681025	2137.06
Motesanib	CC1(CNC2=C1C=CC(=C2)NC(=O)C3=C(N=CC=C3)NCC4=CC=NC=C4)C	0.628906	0.859961	1936.84
1-(3,4-Dimethylphenyl)-N,N-dipropyl-1H-pyrazolo[3,4-d]pyrimidin-4-amine	CCCN(CCC)C1=NC=NC2=C1C=NN2C3=CC(=C(C=C3)C)C	0.686155	1	1737.18
Glasdegib	CN1CC[C@H](C[C@@H]1C2=NC3=CC=CC=C3N2)NC(=O)NC4=CC=C(C=C4)C#N	0.654538	0.854084	1975.72
(S)-N-((1-((4-Chlorophenyl)amino)-1-oxopropan-2-yl)oxy)-3,5-bis(trifluoromethyl)benzamide	C[C@@H](C(=O)NC1=CC=C(C=C1)Cl)ONC(=O)C2=CC(=CC(=C2)C(F)(F)F)C(F)(F)F	0.489677	0.778342	1434.72
Selumetinib	CN1C=NC2=C1C=C(C(=C2F)NC3=C(C=C(C=C3)Br)Cl)C(=O)NOCCO	0.389286	0.718071	1575.8
Taladegib	CN1C(=CC=N1)C2=NN=C(C3=CC=CC=C32)N4CCC(CC4)N(C)C(=O)C5=C(C=C(C=C5)F)C(F)(F)F	0.363051	0.807908	2508.78
9,11-Octadecadienoic acid	CCCCCC/C=C/C=C/CCCCCCCC(=O)O	0.318262	0.909938	1424.53
Ravoxertinib	CN1C(=CC=N1)NC2=NC=CC(=N2)C3=CC(=O)N(C=C3)[C@H](CO)C4=CC(=C(C=C4)Cl)F	0.477686	0.795205	2062.27
Becatecarin	CCN(CC)CCN1C(=O)C2=C3C4=C(C(=CC=C4)Cl)NC3=C5C(=C2C1=O)C6=C(N5[C@H]7[C@@H]([C@H]([C@@H]([C@H](O7)CO)OC)O)O)C(=CC=C6)Cl	0.17953	0.475592	3498.3
Fub-PB-22	C1=CC=C2C(=C1)C(=CN2CC3=CC=C(C=C3)F)C(=O)OC4=CC=CC5=C4N=CC=C5	0.293537	0.933792	2215.41
JWH 210 8-ethylnaphthyl isomer	CCCCCN1C=C(C2=CC=CC=C21)C(=O)C3=CC=CC4=C3C(=CC=C4)CC	0.259906	0.772061	2301.38
Dtxsid901016734	CN(CC1=CC(=CC=C1)C2=CC=NC=C2)C(=O)OC(C(F)(F)F)C(F)(F)F	0.701683	0.973023	1355.89
(R)-Bendroflumethiazide	C1=CC=C(C=C1)C[C@@H]2NC3=C(C=C(C(=C3)C(F)(F)F)S(=O)(=O)N)S(=O)(=O)N2	0.696165	0.711293	1678.25
Neurodazine	COC1=CC=C(C=C1)C2=C(N=C(N2)C3=CC=C(O3)C4=CC(=CC=C4)Cl)C5=CC=C(C=C5)OC	0.290073	0.643643	2311.84
Osimertinib	CN1C=C(C2=CC=CC=C21)C3=NC(=NC=C3)NC4=C(C=C(C(=C4)NC(=O)C=C)N(C)CCN(C)C)OC	0.310535	0.734648	2768.34
(1-((4-Hydroxycyclohexyl)methyl)-1H-indazole-3-carbonyl)-L-valine	CC(C)[C@@H](C(=O)O)NC(=O)C1=NN(C2=CC=CC=C21)CC3CCC(CC3)O	0.721285	0.838061	1842.44
JWH 018 N-(1-ethylpropyl) isomer	CCC(CC)N1C=C(C2=CC=CC=C21)C(=O)C3=CC=CC4=CC=CC=C43	0.385648	0.809872	2069.66
CID 46194178	CC1=C(C(=O)N(N1C)C2=CC=C(C=C2)F)C(=O)NC3=CC(=C(C=C3)OC4=C5C(=CNC5=NC=C4)C6=CC=CC=C6)F	0.252286	0.601161	3035.03
2-(1-(4-Chlorobenzoyl)-5-methoxy-2-methyl-1H-indol-3-yl)-1-morpholinoethanone	CC1=C(C2=C(N1C(=O)C3=CC=C(C=C3)Cl)C=CC(=C2)OC)CC(=O)N4CCOCC4	0.637832	0.907416	2031.27
JWH 122 N-(4-pentenyl) analog	CC1=CC=C(C2=CC=CC=C12)C(=O)C3=CN(C4=CC=CC=C43)CCCC=C	0.226402	0.819293	2187.35
AM2201 7-hydroxyindole metabolite	C1=CC=C2C(=C1)C=CC=C2C(=O)C3=CN(C4=C3C=CC=C4O)CCCCCF	0.324119	0.90686	2127.52
[1-[(4R)-5-Fluoro-4-hydroxypentyl]indol-3-yl]-naphthalen-1-ylmethanone	C1=CC=C2C(=C1)C=CC=C2C(=O)C3=CN(C4=CC=CC=C43)CCC[C@H](CF)O	0.454776	0.96814	2131.52
Canertinib	C=CC(=O)NC1=C(C=C2C(=C1)C(=NC=N2)NC3=CC(=C(C=C3)F)Cl)OCCCN4CCOCC4	0.342973	0.743397	2237.71
4'-{[Pentanoyl(phenyl)amino]methyl}[1,1'-biphenyl]-2-carboxylic acid	CCCCC(=O)N(CC1=CC=C(C=C1)C2=CC=CC=C2C(=O)O)C3=CC=CC=C3	0.53328	0.904681	2033.41
Benzoic acid, 4-((1S)-1-(((3-(difluoromethyl)-1-methyl-5-(3-(trifluoromethyl)phenoxy)-1H-pyrazol-4-yl)carbonyl)amino)ethyl)-	C[C@@H](C1=CC=C(C=C1)C(=O)O)NC(=O)C2=C(N(N=C2C(F)F)C)OC3=CC=CC(=C3)C(F)(F)F	0.441731	0.731708	1949.57
5-(2-Chlorophenyl)-7-fluoro-1,2-dihydro-8-methoxy-3-methylpyrazolo(3,4-b)(1,4)benzodiazepine	CC1=C2C(=NN1)NC3=CC(=C(C=C3C(=N2)C4=CC=CC=C4Cl)F)OC	0.544729	0.921306	1553.12
Madrasin	CC1=C(N=C(NC1=O)NC2=NC(=C3C=CC(=CC3=N2)OC)C)C	0.771259	0.920443	1554.34
3-(4-Methylsulphonylphenyl)-4-phenyl-5-trifluoromethylisoxazole	CS(=O)(=O)C1=CC=C(C=C1)C2=NOC(=C2C3=CC=CC=C3)C(F)(F)F	0.687061	0.998506	1506.59
Taurolithocholic acid 3-sulfate	C[C@H](CCC(=O)NCCS(=O)(=O)O)[C@H]1CC[C@@H]2[C@@]1(CC[C@H]3[C@H]2CC[C@H]4[C@@]3(CC[C@H](C4)OS(=O)(=O)O)C)C	0.352786	0.498305	2902.07
JQ-1 carboxylic acid	CC1=C(SC2=C1C(=N[C@H](C3=NN=C(N32)C)CC(=O)O)C4=CC=C(C=C4)Cl)C	0.71125	0.935052	1710.07
[1-[(4R)-4-Fluorohexyl]indol-3-yl]-naphthalen-1-ylmethanone	CC[C@H](CCCN1C=C(C2=CC=CC=C21)C(=O)C3=CC=CC4=CC=CC=C43)F	0.336522	0.788227	2208.78
N-[4-[(3,4-Dimethyl-5-isoxazolyl)sulfamoyl]phenyl]-6,8-dimethyl-2-(2-pyridinyl)-4-quinolinecarboxamide	CC1=CC(=C2C(=C1)C(=CC(=N2)C3=CC=CC=N3)C(=O)NC4=CC=C(C=C4)S(=O)(=O)NC5=C(C(=NO5)C)C)C	0.2954	0.58838	2858.66
Retinal	CC1=C(C(CCC1)(C)C)/C=C/C(=C/C=C/C(=C/C=O)/C)/C	0.358458	0.858335	1508.99
JWH 200 7-hydroxyindole metabolite	C1COCCN1CCN2C=C(C3=C2C(=CC=C3)O)C(=O)C4=CC=CC5=CC=CC=C54	0.513449	0.935793	2283.35
Orbifloxacin	C[C@@H]1CN(C[C@@H](N1)C)C2=C(C3=C(C(=C2F)F)C(=O)C(=CN3C4CC4)C(=O)O)F	0.782014	0.889389	1775.24
Abacavir	C1CC1NC2=C3C(=NC(=N2)N)N(C=N3)[C@@H]4C[C@@H](C=C4)CO	0.72723	0.849848	1394.32
SDB-005 (naphthyl)	CCCCCN1C2=CC=CC=C2C(=N1)C(=O)OC3=CC=CC4=CC=CC=C43	0.255965	0.967164	2074.22
Desmosterol	C[C@H](CCC=C(C)C)[C@H]1CC[C@@H]2[C@@]1(CC[C@H]3[C@H]2CC=C4[C@@]3(CC[C@@H](C4)O)C)C	0.503759	0.696933	2316.64
SR2595, >=98% (Hplc)	CC1=C(N(C2=C1C=C(C=C2)C(=O)N[C@@H](C)C3=CC=C(C=C3)C(C)(C)C)CC4=CC=C(C=C4)C5=CC=CC=C5C(=O)O)C	0.210479	0.522639	3351.44
n-[5-[4-(5-{[(2r,6s)-2,6-Dimethyl-4-morpholinyl]methyl}-1,3-oxazol-2-yl)-1h-indazol-6-yl]-2-(methyloxy)-3-pyridinyl]methanesulfonamide	C[C@@H]1CN(C[C@@H](O1)C)CC2=CN=C(O2)C3=C4C=NNC4=CC(=C3)C5=CC(=C(N=C5)OC)NS(=O)(=O)C	0.3823	0.592601	2634.3
(S)-N-(1-Amino-4-methyl-1-oxopentan-2-yl)-1-pentyl-1H-indazole-3-carboxamide	CCCCCN1C2=CC=CC=C2C(=N1)C(=O)N[C@@H](CC(C)C)C(=O)N	0.685412	0.921306	1773.19
N-[4-[3,5-Bis(trifluoromethyl)pyrazol-1-yl]phenyl]-4-methylthiadiazole-5-carboxamide	CC1=C(SN=N1)C(=O)NC2=CC=C(C=C2)N3C(=CC(=N3)C(F)(F)F)C(F)(F)F	0.639652	0.895125	1372.02
(S)-Bendroflumethiazide	C1=CC=C(C=C1)C[C@H]2NC3=C(C=C(C(=C3)C(F)(F)F)S(=O)(=O)N)S(=O)(=O)N2	0.696165	0.711293	1678.25
Benzamide, 5-(2-fluoro-4-pyridinyl)-2-(phenylmethoxy)-N-3-pyridinyl-	C1=CC=C(C=C1)COC2=C(C=C(C=C2)C3=CC(=NC=C3)F)C(=O)NC4=CN=CC=C4	0.457552	0.936371	2005.85
Naphthalen-2-yl1-(2-fluorophenyl)-1H-indazole-3-carboxylate	C1=CC=C2C=C(C=CC2=C1)OC(=O)C3=NN(C4=CC=CC=C43)C5=CC=CC=C5F	0.304076	0.959689	2119.2
Phyllanthin	COC[C@@H](CC1=CC(=C(C=C1)OC)OC)[C@H](CC2=CC(=C(C=C2)OC)OC)COC	0.489544	0.924278	1911.44
4-Chloro-6-{5-[(2-morpholin-4-ylethyl)amino]-1,2-benzisoxazol-3-yl}benzene-1,3-diol	C1COCCN1CCNC2=CC3=C(C=C2)ON=C3C4=CC(=C(C=C4O)O)Cl	0.61625	0.841557	1741.24
Viridiol	C[C@]12[C@@H]([C@@H]([C@@H](C3=COC(=C31)C(=O)C4=C2C=CC5=C4CCC5=O)O)OC)O	0.808765	0.91598	1676.53
1-Butyl-3-(1-naphthoyl)indole	CCCCN1C=C(C2=CC=CC=C21)C(=O)C3=CC=CC4=CC=CC=C43	0.422941	0.875634	1996.27
Methyl (2S)-2-[[1-[(3R)-3-fluoropentyl]indazole-3-carbonyl]amino]-3-methylbutanoate	CC[C@H](CCN1C2=CC=CC=C2C(=N1)C(=O)N[C@@H](C(C)C)C(=O)OC)F	0.731622	0.976172	1741.63
Aprepitant	C[C@H](C1=CC(=CC(=C1)C(F)(F)F)C(F)(F)F)O[C@@H]2[C@@H](N(CCO2)CC3=NNC(=O)N3)C4=CC=C(C=C4)F	0.437625	0.724229	2194.99
Cyclohexanol, 4-(4-(4-fluorophenyl)-5-(2-methoxy-4-pyrimidinyl)-1H-imidazol-1-yl)-, trans-	COC1=NC=CC(=N1)C2=C(N=CN2C3CCC(CC3)O)C4=CC=C(C=C4)F	0.761231	0.974543	1768.75
[(3S)-3-Aminopiperidin-1-yl]-[1-methyl-2-(1-methylindol-2-yl)benzimidazol-5-yl]methanone	CN1C2=C(C=C(C=C2)C(=O)N3CCC[C@@H](C3)N)N=C1C4=CC5=CC=CC=C5N4C	0.573779	0.956576	2282.85
Fluvoxamine, (Z)-	COCCCC/C(=N/OCCN)/C1=CC=C(C=C1)C(F)(F)F	0.432028	0.976499	1214.59
2-(2-Quinolin-3-Ylpyridin-4-Yl)-1,5,6,7-Tetrahydro-4h-Pyrrolo[3,2-C]pyridin-4-One	C1CNC(=O)C2=C1NC(=C2)C3=CC(=NC=C3)C4=CC5=CC=CC=C5N=C4	0.585844	0.921306	1902.59
Bpiq-i	CN1C=NC2=C1C=C3C(=C2)C(=NC=N3)NC4=CC(=CC=C4)Br	0.590737	0.976499	1486.29
S1RA	CC1=CC(=NN1C2=CC3=CC=CC=C3C=C2)OCCN4CCOCC4	0.717338	0.999942	1804.23
(2s)-1-(1h-Indol-3-Yl)-3-{[5-(3-Methyl-1h-Indazol-5-Yl)pyridin-3-Yl]oxy}propan-2-Amine	CC1=C2C=C(C=CC2=NN1)C3=CC(=CN=C3)OC[C@H](CC4=CNC5=CC=CC=C54)N	0.396777	0.828721	2365.23
Semagacestat	C[C@@H](C(=O)N[C@H]1C2=CC=CC=C2CCN(C1=O)C)NC(=O)[C@H](C(C)C)O	0.706043	0.856563	1671.47
Thiosildenafil	CCCC1=NN(C2=C1NC(=NC2=S)C3=C(C=CC(=C3)S(=O)(=O)N4CCN(CC4)C)OCC)C	0.508753	0.790748	2506.07
(R)-Fenpropimorph	C[C@@H]1CN(C[C@@H](O1)C)C[C@H](C)CC2=CC=C(C=C2)C(C)(C)C	0.823292	0.877551	1550.5
N-Desmethyl loperamide	CNC(=O)C(CCN1CCC(CC1)(C2=CC=C(C=C2)Cl)O)(C3=CC=CC=C3)C4=CC=CC=C4	0.532589	0.767104	2283.87
(2R)-2-(1,3-Benzothiazol-2-yl)-2-[2-(2-pyridin-3-ylethylamino)pyrimidin-4-yl]acetonitrile	C1=CC=C2C(=C1)N=C(S2)[C@@H](C#N)C3=NC(=NC=C3)NCCC4=CN=CC=C4	0.553946	0.972235	1811.37
(2S)-2-Acetamido-3-[(2E,6E,10E)-3,7,11,15-tetramethylhexadeca-2,6,10,14-tetraenyl]sulfanylpropanoic acid	CC(=CCC/C(=C/CC/C(=C/CC/C(=C/CSC[C@H](C(=O)O)NC(=O)C)/C)/C)/C)C	0.228906	0.681025	2137.06
Epothilone B	C[C@H]1CCC[C@@]2([C@@H](O2)C[C@H](OC(=O)C[C@@H](C(C(=O)[C@@H]([C@H]1O)C)(C)C)O)/C(=C/C3=CSC(=N3)C)/C)C	0.448689	0.693761	2480.66
JWH 081 5-methoxynaphthyl isomer	CCCCCN1C=C(C2=CC=CC=C21)C(=O)C3=CC=CC4=C3C=CC=C4OC	0.284976	0.872564	2228.07
Doxazosin, (R)-	COC1=C(C=C2C(=C1)C(=NC(=N2)N3CCN(CC3)C(=O)[C@H]4COC5=CC=CC=C5O4)N)OC	0.633464	0.790882	2203.41
(1R,5S,6R,7S)-4-Hydroxy-6-methyl-3,7-bis(3-methylbut-2-enyl)-6-(4-methylpent-3-enyl)-5-(2-methylpropanoyl)bicyclo[3.3.1]non-3-ene-2,9-dione	CC(C)C(=O)[C@]12C(=O)[C@H](C[C@@H]([C@@]1(C)CCC=C(C)C)CC=C(C)C)C(=O)C(=C2O)CC=C(C)C	0.28535	0.630725	2524.78
N-[(2R)-1-Amino-3,3-dimethyl-1-oxobutan-2-yl]-1-[(4S)-4-hydroxypentyl]indole-3-carboxamide	C[C@@H](CCCN1C=C(C2=CC=CC=C21)C(=O)N[C@@H](C(=O)N)C(C)(C)C)O	0.70806	0.859017	1818.57
Delafloxacin	C1C(CN1C2=C(C=C3C(=C2Cl)N(C=C(C3=O)C(=O)O)C4=C(C=C(C(=N4)N)F)F)F)O	0.568456	0.66028	1746.04
N-[5-[[4-(1,1,1,3,3,3-Hexafluoro-2-hydroxypropan-2-yl)phenyl]sulfamoyl]-4-methyl-1,3-thiazol-2-yl]acetamide	CC1=C(SC(=N1)NC(=O)C)S(=O)(=O)NC2=CC=C(C=C2)C(C(F)(F)F)(C(F)(F)F)O	0.571467	0.660155	1499.98
Quinolin-5-yl1-(cyclohexylmethyl)-1H-indole-3-carboxylate	C1CCC(CC1)CN2C=C(C3=CC=CC=C32)C(=O)OC4=CC=CC5=C4C=CC=N5	0.320619	0.906669	2265.39
[(2R,4R,5S,6R)-2-Hydroxy-2-[(2S,3R,4S)-3-hydroxy-4-[(2R,3S,4E,6E,9S,10S,11R,12E,14Z)-10-hydroxy-3,15-dimethoxy-7,9,11,13-tetramethyl-16-oxo-1-oxacyclohexadeca-4,6,12,14-tetraen-2-yl]pentan-2-yl]-5-methyl-6-propan-2-yloxan-4-yl] (E)-4-[(2-hydroxy-5-oxocyclopenten-1-yl)amino]-4-oxobut-2-enoate	C[C@H]1C/C(=C/C=C/[C@@H]([C@H](OC(=O)/C(=C/C(=C/[C@H]([C@H]1O)C)/C)/OC)[C@@H](C)[C@H]([C@H](C)[C@]2(C[C@H]([C@@H]([C@H](O2)C(C)C)C)OC(=O)/C=C/C(=O)NC3=C(CCC3=O)O)O)O)OC)/C	0.136971	0.408647	4335.03
Taurocholic acid 3-sulfate	C[C@H](CCC(=O)NCCS(=O)(=O)O)[C@H]1CC[C@@H]2[C@@]1([C@H](C[C@H]3[C@H]2[C@@H](C[C@H]4[C@@]3(CC[C@H](C4)OS(=O)(=O)O)C)O)O)C	0.247281	0.40989	2952.63
Pluripotin	CC1=C(C=C(C=C1)NC(=O)C2=CC(=CC=C2)C(F)(F)F)N3CC4=CN=C(N=C4N(C3=O)C)NC5=CC(=NN5C)C	0.343754	0.671977	2677
Pyrazolo pyrimidine, 23	COC(=O)N1CCC(CC1)N2C3=C(C=N2)C(=NC(=N3)C4=CC=C(C=C4)NC(=O)NC5CC5)N6CCOCC6	0.525782	0.621352	2643.27
Dorsomorphin	C1CCN(CC1)CCOC2=CC=C(C=C2)C3=CN4C(=C(C=N4)C5=CC=NC=C5)N=C3	0.483206	0.961038	2201.26
20-Hydroxycholesterol	CC(C)CCC[C@@](C)([C@H]1CC[C@@H]2[C@@]1(CC[C@H]3[C@H]2CC=C4[C@@]3(CC[C@@H](C4)O)C)C)O	0.515009	0.741212	2362.83
25B-NB3OMe	COC1=CC=CC(=C1)CNCCC2=CC(=C(C=C2OC)Br)OC	0.707481	0.965373	1466.08
N-[(2S)-1-Amino-3-methyl-1-oxobutan-2-yl]-1-[(4S)-4-hydroxypentyl]indazole-3-carboxamide	C[C@@H](CCCN1C2=CC=CC=C2C(=N1)C(=O)N[C@@H](C(C)C)C(=O)N)O	0.671421	0.824221	1697.94
PF-670462 free base	C1CCC(CC1)N2C=NC(=C2C3=NC(=NC=C3)N)C4=CC=C(C=C4)F	0.776139	0.976499	1676.79
1-Benzyl-5-[(2R)-2-[[4-(trifluoromethyl)phenoxy]methyl]pyrrolidin-1-yl]sulfonylindole-2,3-dione	C1C[C@@H](N(C1)S(=O)(=O)C2=CC3=C(C=C2)N(C(=O)C3=O)CC4=CC=CC=C4)COC5=CC=C(C=C5)C(F)(F)F	0.404078	0.801765	2567.55
[1-[(4S)-4-Fluorohexyl]indol-3-yl]-naphthalen-1-ylmethanone	CC[C@@H](CCCN1C=C(C2=CC=CC=C21)C(=O)C3=CC=CC4=CC=CC=C43)F	0.336522	0.788227	2208.78
5-[3-[[(2R)-1-Amino-3,3-dimethyl-1-oxobutan-2-yl]carbamoyl]indol-1-yl]pentanoic acid	CC(C)(C)[C@H](C(=O)N)NC(=O)C1=CN(C2=CC=CC=C21)CCCCC(=O)O	0.616818	0.803564	1822.13
(3R)-4-[2-(1H-Indol-4-yl)-6-(1-methylsulfonylcyclopropyl)pyrimidin-4-yl]-3-methylmorpholine	C[C@@H]1COCCN1C2=NC(=NC(=C2)C3(CC3)S(=O)(=O)C)C4=C5C=CNC5=CC=C4	0.708918	0.912858	2197.94
(2s)-1,3-Benzothiazol-2-Yl{2-[(2-Pyridin-3-Ylethyl)amino]pyrimidin-4-Yl}ethanenitrile	C1=CC=C2C(=C1)N=C(S2)[C@H](C#N)C3=NC(=NC=C3)NCCC4=CN=CC=C4	0.553946	0.972235	1811.37
Epothilone A	C[C@H]1CCC[C@@H]2[C@@H](O2)C[C@H](OC(=O)C[C@@H](C(C(=O)[C@@H]([C@H]1O)C)(C)C)O)/C(=C/C3=CSC(=N3)C)/C	0.471712	0.700818	2381.06
(R)-1-(1-(Methylsulfonyl)propan-2-yl)-4-(trifluoromethyl)-1H-indole-5-carbonitrile	C[C@H](CS(=O)(=O)C)N1C=CC2=C1C=CC(=C2C(F)(F)F)C#N	0.868375	1	1370.12
Quinolin-4-yl1-(cyclohexylmethyl)-1H-indole-3-carboxylate	C1CCC(CC1)CN2C=C(C3=CC=CC=C32)C(=O)OC4=CC=NC5=CC=CC=C54	0.406038	0.906669	2265.39
Dehydroepiandrosterone	C[C@]12CC[C@H]3[C@H]([C@@H]1CCC2=O)CC=C4[C@@]3(CC[C@@H](C4)O)C	0.686843	0.974685	1552.68
Ataciguat	C1COCCN1S(=O)(=O)C2=CC=C(C=C2)NC(=O)C3=C(C=CC(=C3)Cl)NS(=O)(=O)C4=CC=C(S4)Cl	0.436481	0.635318	2308.83
(S)-Fenpropimorph	C[C@@H]1CN(C[C@@H](O1)C)C[C@@H](C)CC2=CC=C(C=C2)C(C)(C)C	0.823292	0.877551	1550.5
Cumyl-4CN-binaca	CC(C)(C1=CC=CC=C1)NC(=O)C2=NN(C3=CC=CC=C32)CCCCC#N	0.635077	0.976493	1943.02
(4-Methyl-1-naphthalenyl)(2-methyl-1-pentyl-1H-indol-3-yl)methanone	CCCCCN1C(=C(C2=CC=CC=C21)C(=O)C3=CC=C(C4=CC=CC=C43)C)C	0.269493	0.768208	2304.12
4-(5-Methyl-4-{[(4-methylphenyl)sulfonyl]methyl}-1,3-oxazol-2-yl)-N-(3-pyridinylmethyl)benzamide	CC1=CC=C(C=C1)S(=O)(=O)CC2=C(OC(=N2)C3=CC=C(C=C3)C(=O)NCC4=CN=CC=C4)C	0.441259	0.808489	2383.81
19-Hydroxycholesterol	C[C@H](CCCC(C)C)[C@H]1CC[C@@H]2[C@@]1(CC[C@H]3[C@H]2CC=C4[C@@]3(CC[C@@H](C4)O)CO)C	0.507382	0.755835	2368.34
7-(2-(2-(Dimethylamino)ethoxy)ethoxy)-6-methoxy-2-(4-methyl-1,4-diazepan-1-yl)-N-(1-methylpiperidin-4-yl)quinazolin-4-amine	CN1CCCN(CC1)C2=NC3=CC(=C(C=C3C(=N2)NC4CCN(CC4)C)OC)OCCOCCN(C)C	0.450333	0.783397	2734.14
Coumarin Suberoylanilide Hydroxamic Acid	CC1=CC(=O)OC2=C1C=CC(=C2)NC(=O)CCCCCCC(=O)NO	0.294668	0.829822	1666.55
Bardoxolone methyl	C[C@@]12CC[C@]3(CCC(C[C@H]3[C@H]1C(=O)C=C4[C@]2(CC[C@@H]5[C@@]4(C=C(C(=O)C5(C)C)C#N)C)C)(C)C)C(=O)OC	0.386181	0.687772	2825.41
3-[(3R,21S,22S)-16-Ethenyl-11-ethyl-3-methoxycarbonyl-12,17,21,26-tetramethyl-4-oxo-7,23,24,25-tetrazahexacyclo[18.2.1.15,8.110,13.115,18.02,6]hexacosa-1,5,8(26),9,11,13,15,17,19-nonaen-22-yl]propanoic acid	CCC1=C(C2=CC3=C(C(=C(N3)C=C4[C@H]([C@@H](C(=C5[C@H](C(=O)C6=C5NC(=C6C)C=C1N2)C(=O)OC)N4)CCC(=O)O)C)C)C=C)C	0.213823	0.458559	3548.24
Isoquinolin-5-yl1-(cyclohexylmethyl)-1H-indole-3-carboxylate	C1CCC(CC1)CN2C=C(C3=CC=CC=C32)C(=O)OC4=CC=CC5=C4C=CN=C5	0.320619	0.906669	2265.39
Abt-737	CN(C)CC[C@H](CSC1=CC=CC=C1)NC2=C(C=C(C=C2)S(=O)(=O)NC(=O)C3=CC=C(C=C3)N4CCN(CC4)CC5=CC=CC=C5C6=CC=C(C=C6)Cl)[N+](=O)[O-]	0.0577313	0.413637	4348.63
1-(4-Methylpiperazin-1-yl)-2-[[(1S,2R)-2-(4-phenylmethoxyphenyl)cyclopropyl]amino]ethanone	CN1CCN(CC1)C(=O)CN[C@H]2C[C@@H]2C3=CC=C(C=C3)OCC4=CC=CC=C4	0.802858	0.966207	1962.84
1-(4-(4-(2-(Isopropylsulfonyl)phenylamino)-1H-pyrrolo[2,3-b]pyridin-6-ylamino)-3-methoxyphenyl)piperidin-4-ol	CC(C)S(=O)(=O)C1=CC=CC=C1NC2=CC(=NC3=C2C=CN3)NC4=C(C=C(C=C4)N5CCC(CC5)O)OC	0.243024	0.548788	2944
N-[(2R)-1-Amino-3,3-dimethyl-1-oxobutan-2-yl]-1-[(4R)-4-hydroxypentyl]indazole-3-carboxamide	C[C@H](CCCN1C2=CC=CC=C2C(=N1)C(=O)N[C@@H](C(=O)N)C(C)(C)C)O	0.699336	0.824215	1770.99
(7R)-7,8,9,10-Tetrahydrobenzo[a]pyren-7-ol	C1C[C@H](C2=C(C1)C3=C4C(=C2)C=CC5=C4C(=CC=C5)C=C3)O	0.448798	0.8992	1667.94
(S)-1-Benzyl-5-(1-[2-(phenoxy-p-trifluoromethyl)-pyrrolidynyl]-sulfonyl)-isatin	C1C[C@H](N(C1)S(=O)(=O)C2=CC3=C(C=C2)N(C(=O)C3=O)CC4=CC=CC=C4)COC5=CC=C(C=C5)C(F)(F)F	0.404078	0.801765	2567.55
Naphthalen-1-yl1-pentyl-1H-indole-3-carboxylate	CCCCCN1C=C(C2=CC=CC=C21)C(=O)OC3=CC=CC4=CC=CC=C43	0.233489	0.878562	2121.59
Ivacaftor	CC(C)(C)C1=CC(=C(C=C1NC(=O)C2=CNC3=CC=CC=C3C2=O)O)C(C)(C)C	0.568603	0.836987	2130.13
Abivertinib	CN1CCN(CC1)C2=C(C=C(C=C2)NC3=NC4=C(C=CN4)C(=N3)OC5=CC=CC(=C5)NC(=O)C=C)F	0.330074	0.678111	2537.18
Elvitegravir	CC(C)[C@@H](CO)N1C=C(C(=O)C2=C1C=C(C(=C2)CC3=C(C(=CC=C3)Cl)F)OC)C(=O)O	0.563954	0.789711	2069.83
3-(2-((2-Methoxybenzyl)amino)ethyl)quinazoline-2,4(1H,3H)-dione	COC1=CC=CC=C1CNCCN2C(=O)C3=CC=CC=C3NC2=O	0.673359	0.921306	1778.08
Aminotadalafil	C1[C@@H]2C(=O)N(CC(=O)N2[C@@H](C3=C1C4=CC=CC=C4N3)C5=CC6=C(C=C5)OCO6)N	0.48392	0.884464	2000.49
(4-Fluoronaphthalen-1-yl)-(1-pentylindol-3-yl)methanone	CCCCCN1C=C(C2=CC=CC=C21)C(=O)C3=CC=C(C4=CC=CC=C43)F	0.290123	0.813279	2105.1
(7S)-7,8,9,10-Tetrahydrobenzo[a]pyren-7-ol	C1C[C@@H](C2=C(C1)C3=C4C(=C2)C=CC5=C4C(=CC=C5)C=C3)O	0.448798	0.8992	1667.94
Niguldipine	CC1=C([C@@H](C(=C(N1)C)C(=O)OCCCN2CCC(CC2)(C3=CC=CC=C3)C4=CC=CC=C4)C5=CC(=CC=C5)[N+](=O)[O-])C(=O)OC	0.128662	0.652161	3257.36
(1-(2-Morpholin-4-ylethyl)indol-3-yl)-4-methylnaphthalen-1-ylmethanone	CC1=CC=C(C2=CC=CC=C12)C(=O)C3=CN(C4=CC=CC=C43)CCN5CCOCC5	0.458488	0.955277	2368.93
Diacylglycerol kinase inhibitor i	CC1=C(C(=O)N2C=CSC2=N1)CCN3CCC(=C(C4=CC=CC=C4)C5=CC=C(C=C5)F)CC3	0.404114	0.837532	2415.32
Butyl-(2,5-dimethyl-7-(2,4,6-trimethylphenyl)-7H-pyrrolo(2,3-d)pyrimidin-4-yl)ethylamine	CCCCN(CC)C1=NC(=NC2=C1C(=CN2C3=C(C=C(C=C3C)C)C)C)C	0.571649	0.958635	2072.05
Mps1-IN-2	CCOC1=C(C=CC(=C1)N2CCC(CC2)O)NC3=NC=C4C(=N3)N(CCC(=O)N4C)C5CCCC5	0.646571	0.746001	2486.02
Bms-911543	CCN1C(=CC2=C3C(=C(N=C21)NC4=NN(C(=C4)C)C)N=CN3C)C(=O)N(C5CC5)C6CC6	0.504044	0.872816	2430
Quinolin-8-yl1-(5-hydroxypentyl)-1H-indole-3-carboxylate	C1=CC=C2C(=C1)C(=CN2CCCCCO)C(=O)OC3=CC=CC4=C3N=CC=C4	0.29231	0.97079	2101.36
MK-2206	C1CC(C1)(C2=CC=C(C=C2)C3=C(C=C4C(=N3)C=CN5C4=NNC5=O)C6=CC=CC=C6)N	0.468068	0.867547	2431.63
[3-(4-Carbamoylphenyl)phenyl] N-methyl-N-[(3-phenylphenyl)methyl]carbamate	CN(CC1=CC(=CC=C1)C2=CC=CC=C2)C(=O)OC3=CC=CC(=C3)C4=CC=C(C=C4)C(=O)N	0.418219	0.816134	2355.02
1-(3,5-Bis(trifluoromethyl)phenyl)-3-(4-bromo-2-(2H-tetrazol-5-yl)phenyl)thiourea	C1=CC(=C(C=C1Br)C2=NNN=N2)NC(=S)NC3=CC(=CC(=C3)C(F)(F)F)C(F)(F)F	0.319773	0.651875	1460.2
3-[2-(4-Fluorophenyl)ethylamino]-1-methyl-4-(2-methyl-1H-indol-3-yl)pyrrole-2,5-dione	CC1=C(C2=CC=CC=C2N1)C3=C(C(=O)N(C3=O)C)NCCC4=CC=C(C=C4)F	0.671573	0.913053	1949.23
2-(4-Ethoxybenzyl)-1-(cyclohexylmethyl)-N,N-diethyl-1H-benzo[d]imidazole-5-carboxamide	CCN(CC)C(=O)C1=CC2=C(C=C1)N(C(=N2)CC3=CC=C(C=C3)OCC)CC4CCCCC4	0.398818	0.779498	2547.32
Unii-MB2V93qfr2	CCCCCN1C=C(C2=CC=CC=C21)C(=O)C3=CC=CC4=C3C=C(C=C4)CC	0.259906	0.772061	2309.63
Levocabastine	C[C@@H]1CN(CC[C@@]1(C2=CC=CC=C2)C(=O)O)C3CCC(CC3)(C#N)C4=CC=C(C=C4)F	0.764577	0.896738	2163.84
Regorafenib	CNC(=O)C1=NC=CC(=C1)OC2=CC(=C(C=C2)NC(=O)NC3=CC(=C(C=C3)Cl)C(F)(F)F)F	0.40736	0.646692	1836.51
Sulfidefluor-7 AM	CC(=O)OCOC(=O)CN(CC(=O)OCOC(=O)C)C(=O)C1=CC2=C(C=C1)C3(C4=C(C=C(C=C4)N=[N+]=[N-])OC5=C3C=CC(=C5)N=[N+]=[N-])OC2=O	0.0663596	0.6	2964.53
3-[[(1R,3S)-3-Carboxycyclohexyl]carbamoyl]-4-[3-[4-(4-phenoxybutoxy)phenyl]propoxy]benzoic acid	C1C[C@@H](C[C@@H](C1)NC(=O)C2=C(C=CC(=C2)C(=O)O)OCCCC3=CC=C(C=C3)OCCCCOC4=CC=CC=C4)C(=O)O	0.173269	0.46266	3087.44
4-(5,7,7,10,10-Pentamethyl-8,9-dihydronaphtho[2,3-b][1,4]benzodiazepin-13-yl)benzoic acid	CC1(CCC(C2=CC3=C(C=C21)N=C(C4=CC=CC=C4N3C)C5=CC=C(C=C5)C(=O)O)(C)C)C	0.469285	0.689283	2465.08
2-Methyl-1-pentyl-3-(4-methoxynaphthoyl)indole	CCCCCN1C(=C(C2=CC=CC=C21)C(=O)C3=CC=C(C4=CC=CC=C43)OC)C	0.26733	0.826175	2326.93
(5-(2-Fluorophenyl)-1-pentyl-1H-pyrrol-3-yl)(naphthalen-1-yl)methanone	CCCCCN1C=C(C=C1C2=CC=CC=C2F)C(=O)C3=CC=CC4=CC=CC=C43	0.251284	0.751048	2216.09
N-Cyclohexyl-N~3~-[2-(3,4-Dichlorophenyl)ethyl]-N-(2-{[2-(5-Hydroxy-3-Oxo-3,4-Dihydro-2h-1,4-Benzoxazin-8-Yl)ethyl]amino}ethyl)-beta-Alaninamide	C1CCC(CC1)N(CCNCCC2=C3C(=C(C=C2)O)NC(=O)CO3)C(=O)CCNCCC4=CC(=C(C=C4)Cl)Cl	0.205992	0.609607	2712.42
3-((1H-Pyrazolo[3,4-b]pyridin-5-yl)ethynyl)-4-methyl-N-(4-((4-methylpiperazin-1-yl)methyl)-3-(trifluoromethyl)phenyl)benzamide	CC1=C(C=C(C=C1)C(=O)NC2=CC(=C(C=C2)CN3CCN(CC3)C)C(F)(F)F)C#CC4=CC5=C(NN=C5)N=C4	0.373398	0.724503	2762.17
Dasatinib	CC1=C(C(=CC=C1)Cl)NC(=O)C2=CN=C(S2)NC3=CC(=NC(=N3)C)N4CCN(CC4)CCO	0.465717	0.657361	2151.03
(E)-4-[(2R,4R,5S,6R)-2-Hydroxy-2-[(2S,3R,4S)-3-hydroxy-4-[(2R,3S,4E,6E,9S,10S,11R,12E,14Z)-10-hydroxy-3,15-dimethoxy-7,9,11,13-tetramethyl-16-oxo-1-oxacyclohexadeca-4,6,12,14-tetraen-2-yl]pentan-2-yl]-5-methyl-6-propan-2-yloxan-4-yl]oxy-4-oxobut-2-enoic acid	C[C@H]1C/C(=C/C=C/[C@@H]([C@H](OC(=O)/C(=C/C(=C/[C@H]([C@H]1O)C)/C)/OC)[C@@H](C)[C@H]([C@H](C)[C@]2(C[C@H]([C@@H]([C@H](O2)C(C)C)C)OC(=O)/C=C/C(=O)O)O)O)OC)/C	0.177874	0.429702	3727.94
4-(4-Fluorophenyl)-2-(4-nitrophenyl)-5-(4-pyridyl)-1H-imidazole	C1=CC(=CC=C1C2=NC(=C(N2)C3=CC=NC=C3)C4=CC=C(C=C4)F)[N+](=O)[O-]	0.416227	0.976496	1709.63
Platencin	C[C@@]1([C@@H]2C[C@@H]3CC[C@]2(CC3=C)C=CC1=O)CCC(=O)NC4=C(C=CC(=C4O)C(=O)O)O	0.417196	0.642825	2092.3
(4-Methoxynaphthalen-1-yl)(1-pentyl-1H-indol-3-yl)methanone	CCCCCN1C=C(C2=CC=CC=C21)C(=O)C3=CC=C(C4=CC=CC=C43)OC	0.284976	0.872564	2228.07
(24R)-24-Hydroxycholesterol	C[C@H](CC[C@H](C(C)C)O)[C@H]1CC[C@@H]2[C@@]1(CC[C@H]3[C@H]2CC=C4[C@@]3(CC[C@@H](C4)O)C)C	0.525292	0.756007	2366.83
RCS-4 N-(5-carboxypentyl) metabolite	COC1=CC=C(C=C1)C(=O)C2=CN(C3=CC=CC=C32)CCCCC(=O)O	0.489188	0.976499	1796.97
Z-FA-Fmk	C[C@@H](C(=O)CF)NC(=O)[C@H](CC1=CC=CC=C1)NC(=O)OCC2=CC=CC=C2	0.693764	0.902823	1739.66
[(8Ar)-7-[4-(dimethylamino)benzoyl]-1,3-dioxo-5,6,8,8a-tetrahydroimidazo[1,5-a]pyrazin-2-yl] 4-[2-(4-chlorophenyl)ethyl]piperidine-1-carboxylate	CN(C)C1=CC=C(C=C1)C(=O)N2CCN3[C@H](C2)C(=O)N(C3=O)OC(=O)N4CCC(CC4)CCC5=CC=C(C=C5)Cl	0.491718	0.798966	2698.21
Gdc-0623	C1=CC(=C(C=C1I)F)NC2=C(C=CC3=CN=CN32)C(=O)NOCCO	0.301601	0.72022	1476.48
[1-[(2S)-Heptan-2-yl]-2-methylindol-3-yl]-naphthalen-1-ylmethanone	CCCCC[C@H](C)N1C(=C(C2=CC=CC=C21)C(=O)C3=CC=CC4=CC=CC=C43)C	0.239456	0.727932	2404.66
Quinolin-8-yl 1-[(4S)-4-fluoropentyl]indole-3-carboxylate	C[C@@H](CCCN1C=C(C2=CC=CC=C21)C(=O)OC3=CC=CC4=C3N=CC=C4)F	0.327429	0.964859	2080.09
Maytansinol butyrate	CCCC(=O)O[C@H]1CC(=O)N(C2=C(C(=CC(=C2)C/C(=C/C=C/[C@H]([C@]3(C[C@@H]([C@H]([C@H]4[C@]1(O4)C)C)OC(=O)N3)O)OC)/C)OC)Cl)C	0.355147	0.582537	3051.97
5-Chloro NNEI	C1=CC=C2C(=C1)C=CC=C2NC(=O)C3=CN(C4=CC=CC=C43)CCCCCCl	0.28505	0.812228	2163.44
Bosentan	CC(C)(C)C1=CC=C(C=C1)S(=O)(=O)NC2=C(C(=NC(=N2)C3=NC=CC=N3)OCCO)OC4=CC=CC=C4OC	0.293915	0.55832	2691.99
1613724-42-7	CC1=C2C(=NC(=N1)NC3=CN(N=C3)C4CCNCC4)N(C5=CC6=CC=CC=C6C=C5C(=O)N2C)C	0.466493	0.760056	2605.29
(5R)-4-[Hydroxy-(3-methyl-4-phenylmethoxyphenyl)methylidene]-1-(3-morpholin-4-ylpropyl)-5-pyridin-4-ylpyrrolidine-2,3-dione	CC1=C(C=CC(=C1)C(=C2[C@H](N(C(=O)C2=O)CCCN3CCOCC3)C4=CC=NC=C4)O)OCC5=CC=CC=C5	0.254354	0.780001	2782.2
TCS HDAC6 20b	CC(C)C(=O)SCCCCC[C@@H](C(=O)NC12CC3CC(C1)CC(C3)C2)NC(=O)OC(C)(C)C	0.406744	0.729209	2246.71
3-Amino-N-(2,6-difluorophenyl)-5-(4-sulfamoylanilino)-1,2,4-triazole-1-carbothioamide	C1=CC(=C(C(=C1)F)NC(=S)N2C(=NC(=N2)N)NC3=CC=C(C=C3)S(=O)(=O)N)F	0.463679	0.584675	1634.32
UR-144 N-(5-Methylhexyl) analog	CC(C)CCCCN1C=C(C2=CC=CC=C21)C(=O)C3C(C3(C)C)(C)C	0.426387	0.815709	1927.94
3-[(23S,24R)-14-Ethenyl-22,23-bis(methoxycarbonyl)-5-(3-methoxy-3-oxopropyl)-4,10,15,24-tetramethyl-25,26,27,28-tetrazahexacyclo[16.6.1.13,6.18,11.113,16.019,24]octacosa-1,3,5,7,9,11,13,15,17,19,21-undecaen-9-yl]propanoic acid	CC1=C(C2=CC3=C(C(=C(N3)C=C4[C@@]5([C@@H](C(=CC=C5C(=CC6=C(C(=C(N6)C=C1N2)C=C)C)N4)C(=O)OC)C(=O)OC)C)C)CCC(=O)OC)CCC(=O)O	0.160688	0.4122	4216.92
O6-Cyclohexylmethoxy-2-(4'-sulphamoylanilino) purine	C1CCC(CC1)COC2=NC(=NC3=C2NC=N3)NC4=CC=C(C=C4)S(=O)(=O)N	0.576467	0.682701	1959.86
Apoptozole	COC1=CC=C(C=C1)C2=C(N(C(=N2)C3=CC(=CC(=C3)C(F)(F)F)C(F)(F)F)CC4=CC=C(C=C4)C(=O)N)C5=CC=C(C=C5)OC	0.17694	0.57822	2912.34
Gardiquimod	CCNCC1=NC2=C(N1CC(C)(C)O)C3=CC=CC=C3N=C2N	0.670632	0.86493	1656.57
Epz011989	CCN(C1CCC(CC1)N(C)CCOC)C2=CC(=CC(=C2C)C(=O)NCC3=C(C=C(NC3=O)C)C)C#CCN4CCOCC4	0.37841	0.721349	3440.34
[(R)-Cyano-(6-methoxynaphthalen-2-yl)methyl] 2-[(2R,3R)-3-phenyloxiran-2-yl]acetate	COC1=CC2=C(C=C1)C=C(C=C2)[C@H](C#N)OC(=O)C[C@@H]3[C@H](O3)C4=CC=CC=C4	0.470286	0.995068	1912.22
Verruculogen	CC(=C[C@@H]1N2C3=C(C=CC(=C3)OC)C4=C2[C@H](CC(OO1)(C)C)N5C(=O)[C@@H]6CCCN6C(=O)[C@@]5([C@H]4O)O)C	0.470862	0.675922	2618.41
6-[(2R,3R)-3-[(3,4-Dimethoxyphenyl)methyl]-4-methoxy-2-(methoxymethyl)butyl]-4-methoxy-1,3-benzodioxole	COC[C@H](CC1=CC(=C(C=C1)OC)OC)[C@@H](CC2=CC3=C(C(=C2)OC)OCO3)COC	0.506076	0.896353	2081.11
Dabigatran etexilate mesylate	CCCCCCOC(=O)N=C(C1=CC=C(C=C1)NCC2=NC3=C(N2C)C=CC(=C3)C(=O)N(CCC(=O)OCC)C4=CC=CC=N4)N	0.0741488	0.508613	3445.84
Bemcentinib	C1CCN(C1)[C@H]2CCC3=C(CC2)C=C(C=C3)NC4=NN(C(=N4)N)C5=NN=C6C(=C5)CCCC7=CC=CC=C76	0.380718	0.724777	2974.4
Ribociclib	CN(C)C(=O)C1=CC2=CN=C(N=C2N1C3CCCC3)NC4=NC=C(C=C4)N5CCNCC5	0.638012	0.813574	2301.11
11-Deoxyprostaglandin F1alpha	CCCCC[C@@H](/C=C/[C@H]1CC[C@@H]([C@@H]1CCCCCCC(=O)O)O)O	0.345011	0.86493	1695.45
24(S)-Hydroxycholesterol	C[C@H](CC[C@@H](C(C)C)O)[C@H]1CC[C@@H]2[C@@]1(CC[C@H]3[C@H]2CC=C4[C@@]3(CC[C@@H](C4)O)C)C	0.525292	0.756007	2366.83
[2-(4-Bromo-2,5-dimethoxy-phenyl)-ethyl]-(4-methoxy-benzyl)-amine	COC1=CC=C(C=C1)CNCCC2=CC(=C(C=C2OC)Br)OC	0.707481	0.965373	1436.83
Ibipinabant	CN=C(NS(=O)(=O)C1=CC=C(C=C1)Cl)N2C[C@@H](C(=N2)C3=CC=C(C=C3)Cl)C4=CC=CC=C4	0.426107	0.79748	2162.67
Cmpda	CC(C)S(=O)(=O)NCCC1=CC=C(C=C1)CCNS(=O)(=O)C(C)C	0.645987	0.913238	1587.97
Levomefolic acid	CN1[C@H](CNC2=C1C(=O)NC(=N2)N)CNC3=CC=C(C=C3)C(=O)N[C@@H](CCC(=O)O)C(=O)O	0.260222	0.451226	2071.83
Xolegel	CC(=O)N1CCN(CC1)C2=CC=C(C=C2)OC[C@H]3CO[C@](O3)(CN4C=CN=C4)C5=C(C=C(C=C5)Cl)Cl	0.455414	0.803374	2394.56
5-(3-Bromophenyl)-7-(6-morpholin-4-ylpyridin-3-yl)pyrido[2,3-d]pyrimidin-4-amine	C1COCCN1C2=NC=C(C=C2)C3=NC4=NC=NC(=C4C(=C3)C5=CC(=CC=C5)Br)N	0.492447	0.821882	2024.82
Flutamide	CC(C)C(=O)NC1=CC(=C(C=C1)[N+](=O)[O-])C(F)(F)F	0.680178	0.976499	883.82
Clopamide	C[C@@H]1CCC[C@@H](N1NC(=O)C2=CC(=C(C=C2)Cl)S(=O)(=O)N)C	0.874552	0.920613	1371.3
(2S,3R,4S,5R)-1-[5-(1-Adamantylmethoxy)pentyl]-2-(hydroxymethyl)piperidine-3,4,5-triol	C1[C@H]([C@@H]([C@@H]([C@@H](N1CCCCCOCC23CC4CC(C2)CC(C4)C3)CO)O)O)O	0.436302	0.790214	1911.68
N-(3-Pyridyl)indomethacin Amide	CC1=C(C2=C(N1C(=O)C3=CC=C(C=C3)Cl)C=CC(=C2)OC)CC(=O)NC4=CN=CC=C4	0.48666	0.870183	2149.38
trans-Ned 19	COC1=C(C=C(C=C1)[C@@H]2C3=C(C[C@H](N2)C(=O)O)C4=CC=CC=C4N3)CN5CCN(CC5)C6=CC=CC=C6F	0.355613	0.672164	2847.36
8-[[4-(Cyclopropanecarbonyl)piperazin-1-yl]methyl]-1,3-dimethyl-7-(3-methylbutyl)purine-2,6-dione	CC(C)CCN1C(=NC2=C1C(=O)N(C(=O)N2C)C)CN3CCN(CC3)C(=O)C4CC4	0.685993	0.928322	2264.22
5-(((4-(4-Methoxyphenyl)-5-(pyridin-4-yl)-4H-1,2,4-triazol-3-yl)thio)methyl)-3-(p-tolyl)-1,2,4-oxadiazole	CC1=CC=C(C=C1)C2=NOC(=N2)CSC3=NN=C(N3C4=CC=C(C=C4)OC)C5=CC=NC=C5	0.316433	0.854483	2218.62
(1S,5R,6R,7S)-4-Hydroxy-6-methyl-3,7-bis(3-methylbut-2-enyl)-6-(4-methylpent-3-enyl)-5-(2-methylpropanoyl)bicyclo[3.3.1]non-3-ene-2,9-dione	CC(C)C(=O)[C@@]12C(=O)[C@@H](C[C@@H]([C@@]1(C)CCC=C(C)C)CC=C(C)C)C(=O)C(=C2O)CC=C(C)C	0.28535	0.630725	2524.78
Telmisartan	CCCC1=NC2=C(N1CC3=CC=C(C=C3)C4=CC=CC=C4C(=O)O)C=C(C=C2C)C5=NC6=CC=CC=C6N5C	0.243239	0.599126	3184.68
11-Deoxy Prostaglandin F1alpha	CCCCC[C@H](/C=C/[C@H]1CC[C@@H]([C@@H]1CCCCCCC(=O)O)O)O	0.345011	0.86493	1695.45
[1-[(5S)-5-Fluorohexyl]indol-3-yl]-naphthalen-1-ylmethanone	C[C@@H](CCCCN1C=C(C2=CC=CC=C21)C(=O)C3=CC=CC4=CC=CC=C43)F	0.265727	0.788227	2208.78
(S)-4'-((5-((1-(4-Bromophenyl)ethyl)carbamoyl)-2,3-dimethyl-1H-indol-1-yl)methyl)-[1,1'-biphenyl]-2-carboxylic acid	CC1=C(N(C2=C1C=C(C=C2)C(=O)N[C@@H](C)C3=CC=C(C=C3)Br)CC4=CC=C(C=C4)C5=CC=CC=C5C(=O)O)C	0.205162	0.524299	2970.47
JWH-018 2'-naphthyl-N-(1,1-dimethylpropyl) isomer	CCC(C)(C)N1C=C(C2=CC=CC=C21)C(=O)C3=CC4=CC=CC=C4C=C3	0.406782	0.834198	2084.4
Vemurafenib	CCCS(=O)(=O)NC1=C(C(=C(C=C1)F)C(=O)C2=CNC3=C2C=C(C=N3)C4=CC=C(C=C4)Cl)F	0.333091	0.712545	2287.99
JWH-081 N-(5-Hydroxypentyl)	COC1=CC=C(C2=CC=CC=C21)C(=O)C3=CN(C4=CC=CC=C43)CCCCCO	0.334042	0.952755	2255.49
Tert-butyl 2-[(4-chlorophenyl)methyl-[(5-nitrothiophen-2-yl)methyl]amino]acetate	CC(C)(C)OC(=O)CN(CC1=CC=C(C=C1)Cl)CC2=CC=C(S2)[N+](=O)[O-]	0.386523	0.965545	1532.87
3-Deazaneplanocin	C1=CN=C(C2=C1N(C=N2)[C@@H]3C=C([C@H]([C@H]3O)O)CO)N	0.526753	0.758779	1158.38
2,2'-(5,5'-((Oxybis(ethane-2,1-diyl))bis(oxy))bis(pyridine-5,2-diyl))bis(6-(trifluoromethoxy)-1H-benzo[d]imidazole)	C1=CC2=C(C=C1OC(F)(F)F)NC(=N2)C3=NC=C(C=C3)OCCOCCOC4=CN=C(C=C4)C5=NC6=C(N5)C=C(C=C6)OC(F)(F)F	0.107156	0.443296	2912.84
trans-Latanoprost Acid	C1[C@H]([C@@H]([C@H]([C@H]1O)C/C=C/CCCC(=O)O)CC[C@H](CCC2=CC=CC=C2)O)O	0.324178	0.795828	1954.93
Indomethacin heptyl ester	CCCCCCCOC(=O)CC1=C(N(C2=C1C=C(C=C2)OC)C(=O)C3=CC=C(C=C3)Cl)C	0.263532	0.735354	2307.35
(5-(4-(((5-Methylfuran-2-yl)methyl)amino)quinazolin-6-yl)furan-2-yl)methanol	CC1=CC=C(O1)CNC2=NC=NC3=C2C=C(C=C3)C4=CC=C(O4)CO	0.57536	0.921306	1728.83
2-[4,5-Bis[[bis(pyridin-2-ylmethyl)amino]methyl]-2,7-dichloro-3-hydroxy-6-oxoxanthen-9-yl]benzoic acid	C1=CC=C(C(=C1)C2=C3C=C(C(=O)C(=C3OC4=C(C(=C(C=C24)Cl)O)CN(CC5=CC=CC=N5)CC6=CC=CC=N6)CN(CC7=CC=CC=N7)CC8=CC=CC=N8)Cl)C(=O)O	0.101264	0.356837	4542.6
2-[(4-Methylphenyl)sulfonyl]-5-nitrofuran	CC1=CC=C(C=C1)S(=O)(=O)C2=CC=C(O2)[N+](=O)[O-]	0.628374	0.99998	1044.11
[(R)-Cyano-(6-methoxynaphthalen-2-yl)methyl] 2-[(2R,3S)-3-phenyloxiran-2-yl]acetate	COC1=CC2=C(C=C1)C=C(C=C2)[C@H](C#N)OC(=O)C[C@@H]3[C@@H](O3)C4=CC=CC=C4	0.470286	0.995068	1912.22
[(R)-Cyano-(6-methoxynaphthalen-2-yl)methyl] 2-[(2S,3R)-3-phenyloxiran-2-yl]acetate	COC1=CC2=C(C=C1)C=C(C=C2)[C@H](C#N)OC(=O)C[C@H]3[C@H](O3)C4=CC=CC=C4	0.470286	0.995068	1912.22
(4S)-4-[[(2S)-2-Acetamido-4-methylpentanoyl]amino]-5-[[(2S)-1-[[(2S)-3-carboxy-1-oxo-1-[[2-oxo-4-(trifluoromethyl)chromen-7-yl]amino]propan-2-yl]amino]-3-(1H-imidazol-5-yl)-1-oxopropan-2-yl]amino]-5-oxopentanoic acid	CC(C)C[C@@H](C(=O)N[C@@H](CCC(=O)O)C(=O)N[C@@H](CC1=CN=CN1)C(=O)N[C@@H](CC(=O)O)C(=O)NC2=CC3=C(C=C2)C(=CC(=O)O3)C(F)(F)F)NC(=O)C	0.0844749	0.400067	3586.91
7-Bromo-N-(1-phenylcyclopropyl)-3-[(4-piperidin-1-ylpiperidin-1-yl) methyl]-2-[3-(trifluoromethyl)phenyl]quinoline-4-carboxamide	C1CCN(CC1)C2CCN(CC2)CC3=C(C4=C(C=C(C=C4)Br)N=C3C5=CC(=CC=C5)C(F)(F)F)C(=O)NC6(CC6)C7=CC=CC=C7	0.211195	0.576863	3468.37
N-(4-((3-Bromophenyl)amino)quinazolin-6-yl)but-2-ynamide	CC#CC(=O)NC1=CC2=C(C=C1)N=CN=C2NC3=CC(=CC=C3)Br	0.670846	0.909167	1503.98
3-[[(1S,3S)-3-Carboxycyclohexyl]carbamoyl]-4-[3-[4-(4-cyclohexyloxybutoxy)phenyl]propoxy]benzoic acid	C1CCC(CC1)OCCCCOC2=CC=C(C=C2)CCCOC3=C(C=C(C=C3)C(=O)O)C(=O)N[C@H]4CCC[C@@H](C4)C(=O)O	0.193383	0.430627	3135.04
Loperamide	CN(C)C(=O)C(CCN1CCC(CC1)(C2=CC=C(C=C2)Cl)O)(C3=CC=CC=C3)C4=CC=CC=C4	0.516316	0.805556	2369.98
Ticagrelor	CCCSC1=NC(=C2C(=N1)N(N=N2)[C@@H]3C[C@@H]([C@H]([C@H]3O)O)OCCO)N[C@@H]4C[C@H]4C5=CC(=C(C=C5)F)F	0.231041	0.486469	2373.49
5-(6-(4-(Piperazin-1-yl)phenyl)pyrazolo[1,5-a]pyrimidin-3-yl)quinoline	C1CN(CCN1)C2=CC=C(C=C2)C3=CN4C(=C(C=N4)C5=C6C=CC=NC6=CC=C5)N=C3	0.490424	0.92463	2386.93
(R)-2-Amino-7-(4-fluoro-2-(6-methoxypyridin-2-yl)phenyl)-4-methyl-7,8-dihydro-6H-pyrido(4,3-d)pyrimidin-5-one	CC1=C2C(=NC(=N1)N)C[C@@H](NC2=O)C3=C(C=C(C=C3)F)C4=NC(=CC=C4)OC	0.725093	0.893149	1798.93
1H-Pyrazole-1-carboximidamide, 3-(4-chlorophenyl)-N-[(4-chlorophenyl)sulfonyl]-4,5-dihydro-N'-methyl-4-phenyl-, (4R)-	CN=C(NS(=O)(=O)C1=CC=C(C=C1)Cl)N2C[C@H](C(=N2)C3=CC=C(C=C3)Cl)C4=CC=CC=C4	0.426107	0.79748	2162.67
6-(2,6-Dichlorophenyl)-2-{[3-(hydroxymethyl)phenyl]amino}-8-methylpyrido[2,3-D]pyrimidin-7(8H)-one	CN1C2=NC(=NC=C2C=C(C1=O)C3=C(C=CC=C3Cl)Cl)NC4=CC=CC(=C4)CO	0.500125	0.827942	1956.06
Geranylgeraniol	CC(=CCC/C(=C/CC/C(=C/CC/C(=C/CO)/C)/C)/C)C	0.480138	0.805491	1542.68
(20R,22R)-20,22-Dihydroxycholesterol	CC(C)CC[C@H]([C@@](C)([C@H]1CC[C@@H]2[C@@]1(CC[C@H]3[C@H]2CC=C4[C@@]3(CC[C@@H](C4)O)C)C)O)O	0.518547	0.767656	2389.35
5'-O-[(4-Cyanophenyl)methyl]-8-[[(3,4-dichlorophenyl)methyl]amino]-adenosine	C1=CC(=CC=C1COC[C@@H]2[C@H]([C@H]([C@@H](O2)N3C4=NC=NC(=C4N=C3NCC5=CC(=C(C=C5)Cl)Cl)N)O)O)C#N	0.253593	0.437276	2475.81
5F-Cumyl-PINACA	CC(C)(C1=CC=CC=C1)NC(=O)C2=NN(C3=CC=CC=C32)CCCCCF	0.579134	0.974956	1948.38
(2R,3R)-3-[[(2S)-4-Methyl-1-(3-methylbutylamino)-1-oxopentan-2-yl]carbamoyl]oxirane-2-carboxylic acid	CC(C)CCNC(=O)[C@H](CC(C)C)NC(=O)[C@H]1[C@@H](O1)C(=O)O	0.538086	0.831884	1276.1
Defactinib	CNC(=O)C1=CC=C(C=C1)NC2=NC=C(C(=N2)NCC3=NC=CN=C3N(C)S(=O)(=O)C)C(F)(F)F	0.416341	0.517806	2157.05
(R)-N-(4-(4-(2-(Diethylamino)-2-oxo-1-phenylethyl)piperazin-1-yl)-3-fluorophenyl)-2-(pyridin-3-yl)benzamide	CCN(CC)C(=O)[C@@H](C1=CC=CC=C1)N2CCN(CC2)C3=C(C=C(C=C3)NC(=O)C4=CC=CC=C4C5=CN=CC=C5)F	0.274938	0.713842	3103.22
Clobenpropit	C1=CC(=CC=C1CN=C(N)SCCCC2=CN=CN2)Cl	0.488873	0.921306	1214.31
Bisdemethoxycurcumin	C1=CC(=CC=C1/C=C/C(=O)CC(=O)/C=C/C2=CC=C(C=C2)O)O	0.63368	0.921306	1296.82
Necrostatin-5	COC1=CC=C(C=C1)N2C(=O)C3=C(N=C2SCC#N)SC4=C3CCCC4	0.503989	0.985236	1759.11
Spinosyn D	CC[C@H]1CCC[C@@H]([C@H](C(=O)C2=C[C@H]3[C@@H]4C[C@@H](C[C@H]4C(=C[C@H]3[C@@H]2CC(=O)O1)C)O[C@H]5[C@@H]([C@@H]([C@H]([C@@H](O5)C)OC)OC)OC)C)O[C@H]6CC[C@@H]([C@H](O6)C)N(C)C	0.208646	0.691825	4184.17
N-[2-(Dimethylamino)ethyl]-N-methyl-4-[({4-[4-morpholin-4-yl-7-(2,2,2-trifluoroethyl)-7H-pyrrolo[2,3-d]pyrimidin-2-yl]phenyl}carbamoyl)amino]benzamide	CN(C)CCN(C)C(=O)C1=CC=C(C=C1)NC(=O)NC2=CC=C(C=C2)C3=NC4=C(C=CN4CC(F)(F)F)C(=N3)N5CCOCC5	0.276263	0.688839	3113.46
4'-[(2,3-Dimethyl-5-{[(1s)-1-(4-Nitrophenyl)ethyl]carbamoyl}-1h-Indol-1-Yl)methyl]biphenyl-2-Carboxylic Acid	CC1=C(N(C2=C1C=C(C=C2)C(=O)N[C@@H](C)C3=CC=C(C=C3)[N+](=O)[O-])CC4=CC=C(C=C4)C5=CC=CC=C5C(=O)O)C	0.159261	0.489648	3081.37
N-((2S)-1-Amino-3-methyl-1-oxobutan-2-yl)-1-((2-fluorophenyl)methyl)-1H-indazole-3-carboxamide	CC(C)[C@@H](C(=O)N)NC(=O)C1=NN(C2=CC=CC=C21)CC3=CC=CC=C3F	0.700272	0.91935	1811.01
(4As,6aR,6aS,6bR,8aR,10R,11R,12aR,14bR)-10,11-dihydroxy-2,2,6a,6b,9,9,12a-heptamethyl-1,3,4,5,6,6a,7,8,8a,10,11,12,13,14b-tetradecahydropicene-4a-carboxylic acid	C[C@@]12CC[C@@H]3[C@@]([C@H]1CC=C4[C@]2(CC[C@@]5([C@@H]4CC(CC5)(C)C)C(=O)O)C)(C[C@H]([C@@H](C3(C)C)O)O)C	0.396846	0.596026	2684.3
[(R)-Cyano-(6-methoxynaphthalen-2-yl)methyl] 2-[(2S,3S)-3-phenyloxiran-2-yl]acetate	COC1=CC2=C(C=C1)C=C(C=C2)[C@H](C#N)OC(=O)C[C@H]3[C@@H](O3)C4=CC=CC=C4	0.470286	0.995068	1912.22
N-[5-(4-Methoxybenzyl)-1,3,4-thiadiazol-2-yl]benzenesulfonamide	COC1=CC=C(C=C1)CC2=NN=C(S2)NS(=O)(=O)C3=CC=CC=C3	0.729955	0.976441	1531.77
1-(3,4-Dichlorophenyl)-3-(4-methoxyphenyl)-4-morpholin-4-ylpyrrole-2,5-dione	COC1=CC=C(C=C1)C2=C(C(=O)N(C2=O)C3=CC(=C(C=C3)Cl)Cl)N4CCOCC4	0.689973	0.894847	1709.93
PAFAH1b2/3-IN-P11	CC1=CC=C(C=C1)[C@@H]2CC=C([C@@H](N2S(=O)(=O)C3=CC=C(C=C3)C)C4=CC=C(C=C4)C(C)(C)C)C(=O)O	0.431874	0.653891	2714.15
Entecavir	C=C1[C@H](C[C@@H]([C@H]1CO)O)N2C=NC3=C2N=C(NC3=O)N	0.530115	0.709107	1290.58
(2S)-3-(1H-Indol-3-yl)-2-methyl-2-[(4-nitrophenyl)carbamoylamino]-N-[(1-pyridin-2-ylcyclohexyl)methyl]propanamide	C[C@](CC1=CNC2=CC=CC=C21)(C(=O)NCC3(CCCCC3)C4=CC=CC=N4)NC(=O)NC5=CC=C(C=C5)[N+](=O)[O-]	0.157086	0.438315	3078.33
(5s)-4-[(3e,7e)-4,8-Dimethyl-10-(2,6,6-Trimethylcyclohex-1-En-1-Yl)deca-3,7-Dien-1-Yl]-5-Hydroxyfuran-2(5h)-One	CC1=C(C(CCC1)(C)C)CC/C(=C/CC/C(=C/CCC2=CC(=O)O[C@@H]2O)/C)/C	0.360971	0.818181	2077.11
Hydroxyflutamide	CC(C)(C(=O)NC1=CC(=C(C=C1)[N+](=O)[O-])C(F)(F)F)O	0.660191	0.920629	902.223
2-Chloro-5-{[(2,2-Dimethylpropanoyl)amino]methyl}-N-(1h-Imidazol-2-Yl)benzamide	CC(C)(C)C(=O)NCC1=CC(=C(C=C1)Cl)C(=O)NC2=NC=CN2	0.802916	0.86493	1393.16
Levoleucovorin	C1[C@@H](N(C2=C(N1)N=C(NC2=O)N)C=O)CNC3=CC=C(C=C3)C(=O)N[C@@H](CCC(=O)O)C(=O)O	0.213131	0.43393	2077.96
7-[3-(Dimethylamino)propoxy]-6-Methoxy-2-(4-Methyl-1,4-Diazepan-1-Yl)-N-(1-Methylpiperidin-4-Yl)quinazolin-4-Amine	CN1CCCN(CC1)C2=NC3=CC(=C(C=C3C(=N2)NC4CCN(CC4)C)OC)OCCCN(C)C	0.539901	0.7988	2604.49
(3R,6S,9S,12R)-3-[(2S)-Butan-2-yl]-6-[(1-methoxyindol-3-yl)methyl]-9-(6-oxooctyl)-1,4,7,10-tetrazabicyclo[10.4.0]hexadecane-2,5,8,11-tetrone	CC[C@H](C)[C@@H]1C(=O)N2CCCC[C@@H]2C(=O)N[C@H](C(=O)N[C@H](C(=O)N1)CC3=CN(C4=CC=CC=C43)OC)CCCCCC(=O)CC	0.31088	0.518094	3472.88
(S)-5-(4-Hydroxy-4-methylisoxazolidine-2-carbonyl)-1-isopropyl-3-methyl-6-((3-methyl-5-(trifluoromethyl)-1H-pyrazol-4-yl)methyl)thieno[2,3-d]pyrimidine-2,4(1H,3H)-dione	CC1=C(C(=NN1)C(F)(F)F)CC2=C(C3=C(S2)N(C(=O)N(C3=O)C)C(C)C)C(=O)N4C[C@](CO4)(C)O	0.549049	0.639681	2318.03
5-(4-Chlorophenyl)-1-(2,4-dichlorophenyl)-3-hexyl-1,2,4-triazole	CCCCCCC1=NN(C(=N1)C2=CC=C(C=C2)Cl)C3=C(C=C(C=C3)Cl)Cl	0.39325	0.749444	1586.6
Dexniguldipine	CC1=C([C@H](C(=C(N1)C)C(=O)OCCCN2CCC(CC2)(C3=CC=CC=C3)C4=CC=CC=C4)C5=CC(=CC=C5)[N+](=O)[O-])C(=O)OC	0.128662	0.652161	3257.36
2-Amino-9-[(2R,3R,4S,5R)-3,4-dihydroxy-5-(hydroxymethyl)oxolan-2-yl]-7-methyl-3H-purin-9-ium-6-thione	CN1C=[N+](C2=C1C(=S)N=C(N2)N)[C@H]3[C@@H]([C@@H]([C@H](O3)CO)O)O	0.323199	0.678924	1302.86
Megestrol acetate	CC1=C[C@@H]2[C@H](CC[C@]3([C@H]2CC[C@@]3(C(=O)C)OC(=O)C)C)[C@@]4(C1=CC(=O)CC4)C	0.654195	0.983982	2024.55
[1-[(5R)-5-Fluorohexyl]indol-3-yl]-naphthalen-1-ylmethanone	C[C@H](CCCCN1C=C(C2=CC=CC=C21)C(=O)C3=CC=CC4=CC=CC=C43)F	0.265727	0.788227	2208.78
N-(4-Chloropyridin-3-yl)-4-((2,2-difluorobenzo[d][1,3]dioxol-5-yl)methyl)piperazine-1-carboxamide	C1CN(CCN1CC2=CC3=C(C=C2)OC(O3)(F)F)C(=O)NC4=C(C=CN=C4)Cl	0.839604	0.916239	1603.29
(2S)-N-[3-[(2-Hydroxynaphthalen-1-yl)methylideneamino]phenyl]-2-phenylpropanamide	C[C@@H](C1=CC=CC=C1)C(=O)NC2=CC(=CC=C2)N=CC3=C(C=CC4=CC=CC=C43)O	0.405533	0.807549	2224.71
Omaveloxolone	C[C@@]12CC[C@]3(CCC(C[C@H]3[C@H]1C(=O)C=C4[C@]2(CC[C@@H]5[C@@]4(C=C(C(=O)C5(C)C)C#N)C)C)(C)C)NC(=O)C(C)(F)F	0.410042	0.622334	2983.31
Tamibarotene	CC1(CCC(C2=C1C=CC(=C2)NC(=O)C3=CC=C(C=C3)C(=O)O)(C)C)C	0.818824	0.921306	1760
21-Deacetyldeflazacort	CC1=N[C@@]2([C@H](O1)C[C@@H]3[C@@]2(C[C@@H]([C@H]4[C@H]3CCC5=CC(=O)C=C[C@]45C)O)C)C(=O)CO	0.740338	0.878151	2018.05
S-(2-(6-(4-(3-(Dimethylamino)propoxy)phenylsulfonamido)pyridin-3-yl)-2-oxoethyl) ethanethioate	CC(=O)SCC(=O)C1=CN=C(C=C1)NS(=O)(=O)C2=CC=C(C=C2)OCCCN(C)C	0.410601	0.813405	1952.71
Lactobacillic acid	CCCCCC[C@H]1C[C@H]1CCCCCCCCCC(=O)O	0.365829	0.873394	1564.6
1-[1-[(4R)-4-Hydroxypentyl]indol-3-yl]-2-(2-methoxyphenyl)ethanone	C[C@H](CCCN1C=C(C2=CC=CC=C21)C(=O)CC3=CC=CC=C3OC)O	0.6178	0.976499	1924.66
(2S,3R)-3-[[(2S)-4-Methyl-1-(3-methylbutylamino)-1-oxopentan-2-yl]carbamoyl]oxirane-2-carboxylic acid	CC(C)CCNC(=O)[C@H](CC(C)C)NC(=O)[C@H]1[C@H](O1)C(=O)O	0.538086	0.831884	1276.1
(2R,3S)-3-[[(2S)-4-Methyl-1-(3-methylbutylamino)-1-oxopentan-2-yl]carbamoyl]oxirane-2-carboxylic acid	CC(C)CCNC(=O)[C@H](CC(C)C)NC(=O)[C@@H]1[C@@H](O1)C(=O)O	0.538086	0.831884	1276.1
(3S)-3-(3-Bromo-5-tert-butylphenyl)-3-[[2-[[3-hydroxy-5-[[(5S)-5-hydroxy-1,4,5,6-tetrahydropyrimidin-2-yl]amino]benzoyl]amino]acetyl]amino]propanoic acid	CC(C)(C)C1=CC(=CC(=C1)[C@H](CC(=O)O)NC(=O)CNC(=O)C2=CC(=CC(=C2)O)NC3=NC[C@H](CN3)O)Br	0.245356	0.405172	2465.53
N-[4-({3-[(3,5-Dimethoxyphenyl)amino]quinoxalin-2-yl}sulfamoyl)phenyl]-3-methoxy-4-methylbenzamide	CC1=C(C=C(C=C1)C(=O)NC2=CC=C(C=C2)S(=O)(=O)NC3=NC4=CC=CC=C4N=C3NC5=CC(=CC(=C5)OC)OC)OC	0.182682	0.462516	3145.5
N-(4-Chloro-3-methoxyphenyl)pyridine-2-carboxamide	COC1=C(C=CC(=C1)NC(=O)C2=CC=CC=N2)Cl	0.925109	0.976499	1011.97
Arphamenine B	C1=CC(=CC=C1C[C@H](CC(=O)[C@H](CCCN=C(N)N)N)C(=O)O)O	0.227263	0.61756	1414.23
Mdmb-fubinaca	CC(C)(C)[C@@H](C(=O)OC)NC(=O)C1=NN(C2=CC=CC=C21)CC3=CC=C(C=C3)F	0.668603	0.941101	1949.44
1-[(E,2S)-4-[3-(4-Fluorophenoxy)phenyl]but-3-en-2-yl]-1-hydroxyurea	C[C@@H](/C=C/C1=CC(=CC=C1)OC2=CC=C(C=C2)F)N(C(=O)N)O	0.650668	0.921306	1369.95
CPI-0610 anhydrous	CC1=NOC2=C1C3=CC=CC=C3C(=N[C@H]2CC(=O)N)C4=CC=C(C=C4)Cl	0.759048	0.975561	1687.61
4-[(3s)-1-Azabicyclo[2.2.2]oct-3-Ylamino]-3-(1h-Benzimidazol-2-Yl)-6-Chloroquinolin-2(1h)-One	C1CN2CCC1[C@@H](C2)NC3=C(C(=O)NC4=C3C=C(C=C4)Cl)C5=NC6=CC=CC=C6N5	0.464104	0.786406	2329.5
App-chminaca	C1CCC(CC1)CN2C3=CC=CC=C3C(=N2)C(=O)N[C@@H](CC4=CC=CC=C4)C(=O)N	0.631981	0.873189	2209.43
AM2201 6-hydroxyindole metabolite	C1=CC=C2C(=C1)C=CC=C2C(=O)C3=CN(C4=C3C=CC(=C4)O)CCCCCF	0.324119	0.90686	2127.52
2-[(R)-Butylsulfinyl]-4-phenyl-6-thiophen-2-ylthieno[2,3-b]pyridin-3-amine	CCCC[S@@](=O)C1=C(C2=C(S1)N=C(C=C2C3=CC=CC=C3)C4=CC=CS4)N	0.41116	0.812174	1934.57
1-[(E,2R)-4-[3-(4-Fluorophenoxy)phenyl]but-3-en-2-yl]-1-hydroxyurea	C[C@H](/C=C/C1=CC(=CC=C1)OC2=CC=C(C=C2)F)N(C(=O)N)O	0.650668	0.921306	1369.95
Bakuchiol	CC(=CCC[C@@](C)(C=C)/C=C/C1=CC=C(C=C1)O)C	0.680656	0.887704	1304.93
1-(2,4-Dichlorophenyl)-5-(4-iodophenyl)-4-methyl-N-(piperidin-1-yl)-1H-pyrazole-3-carboxamide	CC1=C(N(N=C1C(=O)NN2CCCCC2)C3=C(C=C(C=C3)Cl)Cl)C4=CC=C(C=C4)I	0.409067	0.712119	1910.05
[(S)-Cyano-(6-methoxynaphthalen-2-yl)methyl] 2-[(2S,3S)-3-phenyloxiran-2-yl]acetate	COC1=CC2=C(C=C1)C=C(C=C2)[C@@H](C#N)OC(=O)C[C@H]3[C@@H](O3)C4=CC=CC=C4	0.470286	0.995068	1912.22
N-(4-(4-Methylpiperazin-1-Yl)-3'-(Morpholinomethyl)-[1,1'-Biphenyl]-3-Yl)-6-Oxo-4-(Trifluoromethyl)-1,6-Dihydropyridine-3-Carboxamide	CN1CCN(CC1)C2=C(C=C(C=C2)C3=CC=CC(=C3)CN4CCOCC4)NC(=O)C5=CNC(=O)C=C5C(F)(F)F	0.480589	0.722291	2813.09
Valnemulin	C[C@@H]1CC[C@@]23CCC(=O)[C@H]2[C@@]1([C@@H](C[C@@]([C@H]([C@@H]3C)O)(C)C=C)OC(=O)CSC(C)(C)CNC(=O)[C@@H](C(C)C)N)C	0.278602	0.591998	2915.28
ATM4 4-Acetoxy Analog	CC(=O)N(C)CCC1=C2C=CC3=C(C2=CC(=C1)OC)C(=C(C=C3)OC)OC(=O)C	0.359137	0.96796	2039.3
Atazanavir	CC(C)(C)[C@@H](C(=O)N[C@@H](CC1=CC=CC=C1)[C@H](CN(CC2=CC=C(C=C2)C3=CC=CC=N3)NC(=O)[C@H](C(C)(C)C)NC(=O)OC)O)NC(=O)OC	0.154312	0.413909	3688.8
3-[[(1R,3R)-3-Carboxycyclohexyl]carbamoyl]-4-[3-[4-(4-phenoxybutoxy)phenyl]propoxy]benzoic acid	C1C[C@H](C[C@@H](C1)NC(=O)C2=C(C=CC(=C2)C(=O)O)OCCCC3=CC=C(C=C3)OCCCCOC4=CC=CC=C4)C(=O)O	0.173269	0.46266	3087.44
4-[2-[3-(4-Nitrophenyl)-5-oxo-1-phenylpyrazol-4-ylidene]hydrazinyl]benzenesulfonic acid	C1=CC=C(C=C1)N2C(=O)C(=C(N2)C3=CC=C(C=C3)[N+](=O)[O-])N=NC4=CC=C(C=C4)S(=O)(=O)O	0.18563	0.577123	2221.5
(17S,18S)-18-(2-Carboxyethyl)-20-(carboxymethyl)-12-ethenyl-7-ethyl-3,8,13,17-tetramethyl-17,18,21,22,23,24-hexahydroporphyrin-2-carboxylic acid	CCC1=C(C2=CC3=C(C(=C(N3)C=C4[C@H]([C@@H](C(=C(C5=C(C(=C(N5)C=C1N2)C)C(=O)O)CC(=O)O)N4)CCC(=O)O)C)C)C=C)C	0.201155	0.405596	3463.65
(E)-7-[(1R,2R,3S,5S)-3,5-Dihydroxy-2-[(3S)-3-hydroxy-5-phenylpentyl]cyclopentyl]hept-5-enoic acid	C1[C@@H]([C@@H]([C@H]([C@H]1O)C/C=C/CCCC(=O)O)CC[C@@H](CCC2=CC=CC=C2)O)O	0.324178	0.795828	1954.93
Tert-Butyl 3-((3S,6S,12aS)-6-isobutyl-9-methoxy-1,4-dioxo-1,2,3,4,6,7,12,12a-octahydropyrazino[1',2':1,6]pyrido[3,4-b]indol-3-yl)propanoate	CC(C)C[C@H]1C2=C(C[C@@H]3N1C(=O)[C@@H](NC3=O)CCC(=O)OC(C)(C)C)C4=C(N2)C=C(C=C4)OC	0.629391	0.746646	2442.28
Degrasyn	CCC[C@@H](C1=CC=CC=C1)NC(=O)/C(=C/C2=NC(=CC=C2)Br)/C#N	0.4559	0.96078	1519.34
Trifluoperazine	CN1CCN(CC1)CCCN2C3=CC=CC=C3SC4=C2C=C(C=C4)C(F)(F)F	0.709478	0.809761	1814.57
Methenolone enanthate	CCCCCCC(=O)O[C@H]1CC[C@@H]2[C@@]1(CC[C@H]3[C@H]2CC[C@@H]4[C@@]3(C(=CC(=O)C4)C)C)C	0.360996	0.783698	2360.69
3-[[(1S,3S)-3-Carboxycyclohexyl]carbamoyl]-4-[3-[4-(4-phenoxybutoxy)phenyl]propoxy]benzoic acid	C1C[C@@H](C[C@H](C1)NC(=O)C2=C(C=CC(=C2)C(=O)O)OCCCC3=CC=C(C=C3)OCCCCOC4=CC=CC=C4)C(=O)O	0.173269	0.46266	3087.44
Naphthalen-1-yl-[1-[(2S)-pentan-2-yl]indol-3-yl]methanone	CCC[C@H](C)N1C=C(C2=CC=CC=C21)C(=O)C3=CC=CC4=CC=CC=C43	0.385648	0.809872	2097.66
Olmutinib	CN1CCN(CC1)C2=CC=C(C=C2)NC3=NC4=C(C(=N3)OC5=CC=CC(=C5)NC(=O)C=C)SC=C4	0.351629	0.741828	2482.38
JWH 019 5-hydroxyindole metabolite	CCCCCCN1C=C(C2=C1C=CC(=C2)O)C(=O)C3=CC=CC4=CC=CC=C43	0.305369	0.857514	2225.33
Dexpramipexole	CCCN[C@@H]1CCC2=C(C1)SC(=N2)N	0.797873	0.921306	858.829
(2R,3S,6R,7S,8S,9R,10R)-3-[(2R,3R)-2,3-Dihydroxypentan-2-yl]-9-[(2S,3R,4S,6R)-4-(dimethylamino)-3-hydroxy-6-methyloxan-2-yl]oxy-7-[(2R,4R,5S,6S)-5-hydroxy-4-methoxy-4,6-dimethyloxan-2-yl]oxy-2,6,8,10,12-pentamethyl-4,13-dioxabicyclo[8.2.1]tridec-1(12)-en-5-one	CC[C@H]([C@](C)([C@@H]1[C@H](C2=C(C[C@@](O2)([C@@H]([C@H]([C@@H]([C@H](C(=O)O1)C)O[C@H]3C[C@@]([C@H]([C@@H](O3)C)O)(C)OC)C)O[C@H]4[C@@H]([C@H](C[C@H](O4)C)N(C)C)O)C)C)C)O)O	0.257947	0.435257	3696.34
2-[(S)-Butylsulfinyl]-4-phenyl-6-thiophen-2-ylthieno[2,3-b]pyridin-3-amine	CCCC[S@](=O)C1=C(C2=C(S1)N=C(C=C2C3=CC=CC=C3)C4=CC=CS4)N	0.41116	0.812174	1934.57
Bms-378806	C[C@@H]1CN(CCN1C(=O)C(=O)C2=CNC3=NC=CC(=C23)OC)C(=O)C4=CC=CC=C4	0.528998	0.921273	2044.47
N-[4-[4-[(1S)-2-(Diethylamino)-2-oxo-1-phenylethyl]piperazin-1-yl]-3-fluorophenyl]-2-pyridin-3-ylbenzamide	CCN(CC)C(=O)[C@H](C1=CC=CC=C1)N2CCN(CC2)C3=C(C=C(C=C3)NC(=O)C4=CC=CC=C4C5=CN=CC=C5)F	0.274938	0.713842	3103.22
Crt5 (crt0066051)	CCOC1=CC2=C(C=C1)C=C(C=C2)C3=C(N=CC(=C3)C4=CC(=CC=C4)C(=O)NCCN(C)C)N	0.39817	0.779053	2570.02
N-(Naphthalen-1-yl)-2-pentyl-2h-indazole-3-carboxamide	CCCCCN1C(=C2C=CC=CC2=N1)C(=O)NC3=CC=CC4=CC=CC=C43	0.454471	0.940293	2109.24
[1-[(3R)-3-Fluorohexyl]indol-3-yl]-naphthalen-1-ylmethanone	CCC[C@H](CCN1C=C(C2=CC=CC=C21)C(=O)C3=CC=CC4=CC=CC=C43)F	0.336522	0.788227	2208.78
Canagliflozin	CC1=C(C=C(C=C1)[C@H]2[C@@H]([C@H]([C@@H]([C@H](O2)CO)O)O)O)CC3=CC=C(S3)C4=CC=C(C=C4)F	0.485916	0.701212	2063.86
Pseudoerythromycin A enol ether	CC[C@H]([C@](C)([C@H]1[C@H](C2=C(C[C@@](O2)([C@@H]([C@H]([C@@H]([C@H](C(=O)O1)C)O[C@H]3C[C@@]([C@H]([C@@H](O3)C)O)(C)OC)C)O[C@H]4[C@@H]([C@H](C[C@H](O4)C)N(C)C)O)C)C)C)O)O	0.257947	0.435257	3696.34
4-[[6-(Ethylamino)-2-[[1-(phenylmethyl)-5-indolyl]amino]-4-pyrimidinyl]amino]-1-cyclohexanol	CCNC1=CC(=NC(=N1)NC2=CC3=C(C=C2)N(C=C3)CC4=CC=CC=C4)NC5CCC(CC5)O	0.285136	0.668538	2604.45
2-Cyclopropyl-6,7-dimethoxy-4-(4-(2-methoxyphenyl)piperazin-1-yl)quinazoline	COC1=CC=CC=C1N2CCN(CC2)C3=NC(=NC4=CC(=C(C=C43)OC)OC)C5CC5	0.600083	0.920269	2208.06
3-[[(1S,3R)-3-Carboxycyclohexyl]carbamoyl]-4-[3-[4-(4-phenoxybutoxy)phenyl]propoxy]benzoic acid	C1C[C@H](C[C@H](C1)NC(=O)C2=C(C=CC(=C2)C(=O)O)OCCCC3=CC=C(C=C3)OCCCCOC4=CC=CC=C4)C(=O)O	0.173269	0.46266	3087.44
N-[(2R)-1-Amino-3,3-dimethyl-1-oxobutan-2-yl]-1-[(4R)-4-hydroxypentyl]indole-3-carboxamide	C[C@H](CCCN1C=C(C2=CC=CC=C21)C(=O)N[C@@H](C(=O)N)C(C)(C)C)O	0.70806	0.859017	1818.57
(S)-3-(3'-Chloro-[1,1'-biphenyl]-4-yl)-2-(((S)-1-ethoxy-1-oxopropan-2-yl)amino)propanoic acid	CCOC(=O)[C@H](C)N[C@@H](CC1=CC=C(C=C1)C2=CC(=CC=C2)Cl)C(=O)O	0.689998	0.914446	1601.74
(4As,6aR,6aS,6bR,8aS,10R,11R,12aR,14bR)-10,11-dihydroxy-2,2,6a,6b,9,9,12a-heptamethyl-1,3,4,5,6,6a,7,8,8a,10,11,12,13,14b-tetradecahydropicene-4a-carboxylic acid	C[C@@]12CC[C@H]3[C@@]([C@H]1CC=C4[C@]2(CC[C@@]5([C@@H]4CC(CC5)(C)C)C(=O)O)C)(C[C@H]([C@@H](C3(C)C)O)O)C	0.396846	0.596026	2684.3
Emonapride	C[C@@H]1[C@@H](CCN1CC2=CC=CC=C2)NC(=O)C3=CC(=C(C=C3OC)NC)Cl	0.791502	0.900796	1813.55
1,3-Dichloro-5-[(E)-2-[4-(trifluoromethyl)phenyl]ethenyl]benzene	C1=CC(=CC=C1/C=C/C2=CC(=CC(=C2)Cl)Cl)C(F)(F)F	0.579957	0.726457	1006.45
Erythromycin	CC[C@@H]1[C@@]([C@@H]([C@H](C(=O)[C@@H](C[C@@]([C@@H]([C@H]([C@@H]([C@H](C(=O)O1)C)O[C@H]2C[C@@]([C@H]([C@@H](O2)C)O)(C)OC)C)O[C@H]3[C@@H]([C@H](C[C@H](O3)C)N(C)C)O)(C)O)C)C)O)(C)O	0.237873	0.409284	3723.85
1-Pentyl-3-(2-iodobenzoyl)indole	CCCCCN1C=C(C2=CC=CC=C21)C(=O)C3=CC=CC=C3I	0.287981	0.820278	1657.8
1-Hydroxy-N-[2-(5-hydroxy-1H-indol-3-yl)ethyl]naphthalene-2-carboxamide	C1=CC=C2C(=C1)C=CC(=C2O)C(=O)NCCC3=CNC4=C3C=C(C=C4)O	0.454399	0.827067	1906.37
[(S)-Cyano-(6-methoxynaphthalen-2-yl)methyl] 2-[(2R,3S)-3-phenyloxiran-2-yl]acetate	COC1=CC2=C(C=C1)C=C(C=C2)[C@@H](C#N)OC(=O)C[C@@H]3[C@@H](O3)C4=CC=CC=C4	0.470286	0.995068	1912.22
(10-Oxo-10-(4-(3-thioxo-3H-1,2-dithiol-5-yl)phenoxy)decyl)triphenylphosphonium	C1=CC=C(C=C1)[P+](CCCCCCCCCC(=O)OC2=CC=C(C=C2)C3=CC(=S)SS3)(C4=CC=CC=C4)C5=CC=CC=C5	0.0284205	0.558179	3245.65
Terutroban	CC1=C(C2=C(C[C@@H](CC2)NS(=O)(=O)C3=CC=C(C=C3)Cl)C=C1)CCC(=O)O	0.767126	0.866693	1849.76
Methyl 2'-(2-hydroxyphenyl)-(2,4'-bibenzoxazole)-4-carboxylate	COC(=O)C1=C2C(=CC=C1)OC(=N2)C3=C4C(=CC=C3)OC(=N4)C5=CC=CC=C5O	0.4449	0.950063	2016.92
2-(Morpholin-4-ylmethyl)-5-[5-[7-(trifluoromethyl)quinolin-4-yl]sulfanylpentoxy]pyran-4-one	C1COCCN1CC2=CC(=O)C(=CO2)OCCCCCSC3=C4C=CC(=CC4=NC=C3)C(F)(F)F	0.26912	0.795368	2364.26
4-({[(4-Tert-Butylphenyl)sulfonyl]amino}methyl)-N-(Pyridin-3-Yl)benzamide	CC(C)(C)C1=CC=C(C=C1)S(=O)(=O)NCC2=CC=C(C=C2)C(=O)NC3=CN=CC=C3	0.624501	0.835467	2121.55
N,N-Dihexyl-2-(4-fluorophenyl)indole-3-acetamide	CCCCCCN(CCCCCC)C(=O)CC1=C(NC2=CC=CC=C21)C3=CC=C(C=C3)F	0.276578	0.669901	2461
Eggmanone	CC(=C)CN1C(=O)C2=C(N=C1SCC(=O)C3=CC=CS3)SC4=C2CCCC4	0.246903	0.928187	1913.95
[1-[(2S)-2-Fluoropentyl]indol-3-yl]-(4-methylnaphthalen-1-yl)methanone	CCC[C@@H](CN1C=C(C2=CC=CC=C21)C(=O)C3=CC=C(C4=CC=CC=C43)C)F	0.354929	0.796095	2211.52
Omacetaxine mepesuccinate	CC(C)(CCC[C@@](CC(=O)OC)(C(=O)O[C@H]1[C@H]2C3=CC4=C(C=C3CCN5[C@@]2(CCC5)C=C1OC)OCO4)O)O	0.447625	0.62824	2692.01
3-Cyclohexyl-6-[4-[3-(trifluoromethyl)phenyl]-1-piperazinyl]-1H-pyrimidine-2,4-dione	C1CCC(CC1)N2C(=O)C=C(NC2=O)N3CCN(CC3)C4=CC=CC(=C4)C(F)(F)F	0.823944	0.892853	2015.68
Kibdelone A	CCCC1=C(C2=C(C(=O)C3=C(C2=O)C=CC4=C3C(=C5C(=C4OC)OC6=C(C5=O)[C@H]([C@H](C[C@@H]6O)O)O)O)C(=O)N1C)Cl	0.231542	0.430412	2926.3
Quizartinib	CC(C)(C)C1=CC(=NO1)NC(=O)NC2=CC=C(C=C2)C3=CN4C5=C(C=C(C=C5)OCCN6CCOCC6)SC4=N3	0.256948	0.633631	2953.36
Lrrk2-IN-1	CN1CCN(CC1)C2CCN(CC2)C(=O)C3=CC(=C(C=C3)NC4=NC=C5C(=N4)N(C6=CC=CC=C6C(=O)N5C)C)OC	0.494864	0.770958	3056.96
2-Methyl-1-(3-morpholin-4-ylpropyl)-5-phenyl-N-[3-(trifluoromethyl)phenyl]pyrrole-3-carboxamide	CC1=C(C=C(N1CCCN2CCOCC2)C3=CC=CC=C3)C(=O)NC4=CC=CC(=C4)C(F)(F)F	0.498083	0.792223	2318.09
[1-[(2R)-2-Fluoropentyl]indol-3-yl]-(4-methylnaphthalen-1-yl)methanone	CCC[C@H](CN1C=C(C2=CC=CC=C21)C(=O)C3=CC=C(C4=CC=CC=C43)C)F	0.354929	0.796095	2211.52
AB-FUBINACA 3-fluorobenzyl isomer	CC(C)[C@@H](C(=O)N)NC(=O)C1=NN(C2=CC=CC=C21)CC3=CC(=CC=C3)F	0.700272	0.91935	1811.01
Unii-khr1SJ9L0Y	COC1=CC(=C(C=C1CCNCC2=CC=CC=C2O)OC)Br	0.73682	0.920222	1374.05
Amiselimod	CCCCCCCOC1=C(C=C(C=C1)CCC(CO)(CO)N)C(F)(F)F	0.485977	0.856651	1605.77
[4-[(2R)-2-[Isoquinolin-5-ylsulfonyl(methyl)amino]-3-oxo-3-(4-phenylpiperazin-1-yl)propyl]phenyl] isoquinoline-5-sulfonate	CN([C@H](CC1=CC=C(C=C1)OS(=O)(=O)C2=CC=CC3=C2C=CN=C3)C(=O)N4CCN(CC4)C5=CC=CC=C5)S(=O)(=O)C6=CC=CC7=C6C=CN=C7	0.176874	0.680214	4177.39
Calpeptin	CCCC[C@@H](C=O)NC(=O)[C@H](CC(C)C)NC(=O)OCC1=CC=CC=C1	0.592142	0.921137	1689.89
Pracinostat	CCCCC1=NC2=C(N1CCN(CC)CC)C=CC(=C2)/C=C/C(=O)NO	0.38855	0.921306	1858.33
(1S,5Z)-5-[(4-Chlorophenyl)methylidene]-2,2-dimethyl-1-(1,2,4-triazol-1-ylmethyl)cyclopentan-1-ol	CC1(CC/C(=C/C2=CC=C(C=C2)Cl)/[C@@]1(CN3C=NC=N3)O)C	0.941251	0.976499	1432.46
Xanthorrhizol	CC1=C(C=C(C=C1)[C@H](C)CCC=C(C)C)O	0.734935	0.8992	1082.44
25C-Nboh	COC1=CC(=C(C=C1CCNCC2=CC=CC=C2O)OC)Cl	0.767469	0.921306	1374.05
[1-[(3S)-3-Fluorohexyl]indol-3-yl]-naphthalen-1-ylmethanone	CCC[C@@H](CCN1C=C(C2=CC=CC=C21)C(=O)C3=CC=CC4=CC=CC=C43)F	0.336522	0.788227	2208.78
Naphthalen-1-yl-[1-[(2R)-pentan-2-yl]indol-3-yl]methanone	CCC[C@@H](C)N1C=C(C2=CC=CC=C21)C(=O)C3=CC=CC4=CC=CC=C43	0.385648	0.809872	2097.66
AM2201 5-hydroxyindole metabolite	C1=CC=C2C(=C1)C=CC=C2C(=O)C3=CN(C4=C3C=C(C=C4)O)CCCCCF	0.324119	0.90686	2127.52
N-(2-Benzamido-1,3-benzothiazol-6-yl)adamantane-1-carboxamide	C1C2CC3CC1CC(C2)(C3)C(=O)NC4=CC5=C(C=C4)N=C(S5)NC(=O)C6=CC=CC=C6	0.556279	0.775669	2183.72
1-[4-[[4-[4-(1,1,1,3,3,3-Hexafluoro-2-hydroxypropan-2-yl)phenyl]phenyl]methyl]piperazin-1-yl]ethanone	CC(=O)N1CCN(CC1)CC2=CC=C(C=C2)C3=CC=C(C=C3)C(C(F)(F)F)(C(F)(F)F)O	0.691332	0.825793	1795.95
(S)-4-(2-(N-Methylisoquinoline-5-sulfonamido)-3-oxo-3-(4-phenylpiperazin-1-yl)propyl)phenyl isoquinoline-5-sulfonate	CN([C@@H](CC1=CC=C(C=C1)OS(=O)(=O)C2=CC=CC3=C2C=CN=C3)C(=O)N4CCN(CC4)C5=CC=CC=C5)S(=O)(=O)C6=CC=CC7=C6C=CN=C7	0.176874	0.680214	4177.39
1,1,1,3,3,3-Hexafluoropropan-2-yl 4-[bis(1,3-benzodioxol-5-yl)-hydroxymethyl]piperidine-1-carboxylate	C1CN(CCC1C(C2=CC3=C(C=C2)OCO3)(C4=CC5=C(C=C4)OCO5)O)C(=O)OC(C(F)(F)F)C(F)(F)F	0.552742	0.77787	2025.49
(S)-2-(3-(Pyridin-2-ylmethoxy)pyrrolidin-1-yl)-5-(trifluoromethyl)benzoic acid	C1CN(C[C@H]1OCC2=CC=CC=N2)C3=C(C=C(C=C3)C(F)(F)F)C(=O)O	0.876198	0.975386	1519.84
Pramipexole	CCCN[C@H]1CCC2=C(C1)SC(=N2)N	0.797873	0.921306	858.829
Refametinib	COC1=CC(=C(C(=C1NS(=O)(=O)C2(CC2)C[C@@H](CO)O)NC3=C(C=C(C=C3)I)F)F)F	0.343231	0.594869	1845.95
Osi-027	COC1=CC=CC2=C1NC(=C2)C3=C4C(=NC=NN4C(=N3)C5CCC(CC5)C(=O)O)N	0.473974	0.690258	2148.54
(S)-2-[8-Chloro-6-(4-chloro-phenyl)-1-methyl-4H-3-oxa-2,5-diaza-benzo[e]azulen-4-yl]-acetamide	CC1=NOC2=C1C3=C(C=C(C=C3)Cl)C(=N[C@H]2CC(=O)N)C4=CC=C(C=C4)Cl	0.690571	0.936174	1691.01
Capecitabine	CCCCCOC(=O)NC1=NC(=O)N(C=C1F)[C@H]2[C@@H]([C@@H]([C@H](O2)C)O)O	0.640839	0.774506	1470.89
Fluorescein 5-maleimide	C1=CC2=C(C=C1N3C(=O)C=CC3=O)C(=O)OC24C5=C(C=C(C=C5)O)OC6=C4C=CC(=C6)O	0.453188	0.775446	1934.44
1-(5-Chloro-2,4-dimethoxyphenyl)-3-(5-methylisoxazol-3-yl)urea	CC1=CC(=NO1)NC(=O)NC2=CC(=C(C=C2OC)OC)Cl	0.904496	0.921306	1128.8
N-(2-Chlorophenyl)-4-[[2-[4-[2-(4-ethylpiperazin-1-yl)-2-oxoethyl]anilino]-5-fluoropyrimidin-4-yl]amino]benzamide	CCN1CCN(CC1)C(=O)CC2=CC=C(C=C2)NC3=NC=C(C(=N3)NC4=CC=C(C=C4)C(=O)NC5=CC=CC=C5Cl)F	0.230275	0.603339	2897.96
N-Cyclopentyl-2-diazenyl-1-(3-methoxypropyl)-1H-pyrrolo[2,3-B]quinoxaline-3-carboxamide	COCCCN1C(=C(C2=NC3=CC=CC=C3N=C21)C(=O)NC4CCCC4)N=N	0.477943	0.885778	1994.89
(6R)-Folinic acid	C1[C@H](N(C2=C(N1)N=C(NC2=O)N)C=O)CNC3=CC=C(C=C3)C(=O)N[C@@H](CCC(=O)O)C(=O)O	0.213131	0.43393	2077.96
N-(3-(4-Methylpiperazin-1-yl)phenyl)-8-(4-(methylsulfonyl)phenyl)-[1,2,4]triazolo[1,5-a]pyridin-2-amine	CN1CCN(CC1)C2=CC=CC(=C2)NC3=NN4C=CC=C(C4=N3)C5=CC=C(C=C5)S(=O)(=O)C	0.487268	0.822879	2511.9
4-(5-(4-Chlorophenyl)-3-(trifluoromethyl)-1H-pyrazol-1-yl)benzenesulfonamide	C1=CC(=CC=C1C2=CC(=NN2C3=CC=C(C=C3)S(=O)(=O)N)C(F)(F)F)Cl	0.723475	0.933411	1520.8
9R,15S-Dihydroxy-13E-prostaenoic acid	CCCCC[C@@H](/C=C/[C@H]1CC[C@H]([C@@H]1CCCCCCC(=O)O)O)O	0.345011	0.86493	1695.45
JWH 018 benzimidazole analog	CCCCCN1C2=CC=CC=C2N=C1C(=O)C3=CC=CC4=CC=CC=C43	0.337032	0.959553	2051.89
Procarbazine	CC(C)NC(=O)C1=CC=C(C=C1)CNNC	0.651389	0.86493	938.246
(R)-2-(4-(Biphenyl-4-ylmethylamino)-6-chloropyrimidin-2-ylthio)octanoic acid	CCCCCC[C@H](C(=O)O)SC1=NC(=CC(=N1)Cl)NCC2=CC=C(C=C2)C3=CC=CC=C3	0.129583	0.589888	2177.56
SN38 glucuronide	CCC1=C2CN3C(=CC4=C(C3=O)COC(=O)[C@@]4(CC)O)C2=NC5=C1C=C(C=C5)O[C@H]6[C@@H]([C@H]([C@@H]([C@H](O6)C(=O)O)O)O)O	0.200977	0.409575	2806.31
BQ-788 free acid	CCCC[C@H](C(=O)O)NC(=O)[C@@H](CC1=CN(C2=CC=CC=C21)C(=O)OC)NC(=O)[C@H](CC(C)(C)C)NC(=O)N3[C@@H](CCC[C@@H]3C)C	0.258624	0.441195	3404.55
1-Hydroxymidazolam	C1C2=CN=C(N2C3=C(C=C(C=C3)Cl)C(=N1)C4=CC=CC=C4F)CO	0.775156	0.976499	1509.47
N-[(4-Hydroxy-2-iodo-5-methoxyphenyl)methyl]-8-methylnonanamide	CC(C)CCCCCCC(=O)NCC1=CC(=C(C=C1I)O)OC	0.418409	0.816078	1479.45
Dbibb	C1=CC=C(C(=C1)C(=O)O)S(=O)(=O)NCCCCN2C(=O)C3=CC=CC4=C3C(=CC=C4)C2=O	0.400473	0.700139	2194.55
N-[(2R)-1-Amino-2,3-dimethyl-1-oxobutan-2-yl]-1-pentylindazole-3-carboxamide	CCCCCN1C2=CC=CC=C2C(=N1)C(=O)N[C@](C)(C(C)C)C(=O)N	0.72155	0.921306	1767.68
(S)-Ceralasertib	C[C@@H]1COCCN1C2=NC(=NC(=C2)C3(CC3)[S@@](=N)(=O)C)C4=C5C=CNC5=NC=C4	0.682133	0.82521	2191.32
3'-Deoxyguanosine	C1[C@H](O[C@H]([C@@H]1O)N2C=NC3=C2N=C(NC3=O)N)CO	0.510373	0.678958	1140.48
1-[1-(3,4-Dichlorobenzamidomethyl)cyclohexyl]-4-methylpiperazine	CN1CCN(CC1)C2(CCCCC2)CNC(=O)C3=CC(=C(C=C3)Cl)Cl	0.860544	0.955863	1584.86
Nps-2143	CC(C)(CC1=CC2=CC=CC=C2C=C1)NC[C@H](COC3=C(C(=CC=C3)Cl)C#N)O	0.565836	0.864731	2061.81
(1R)-2,3,3Abeta,8bbeta-Tetrahydro-2alpha-hydroxy-1beta-[(E,3S,4R)-3-hydroxy-4-methyl-1-octene-6-ynyl]-1H-cyclopenta[b]benzofuran-5-butyric acid	CC#CC[C@@H](C)[C@@H](/C=C/[C@H]1[C@@H](C[C@H]2[C@@H]1C3=CC=CC(=C3O2)CCCC(=O)O)O)O	0.462068	0.82772	2016.03
(2R,3R,4S,5R)-2-(4-Amino-6-chloro-1H-imidazo[4,5-c]pyridin-1-yl)-5-(hydroxymethyl)tetrahydrofuran-3,4-diol	C1=C2C(=C(N=C1Cl)N)N=CN2[C@H]3[C@@H]([C@@H]([C@H](O3)CO)O)O	0.538937	0.721897	1108.21
4-[4-[(Dimethylamino)methyl]-2,6-dimethoxyphenyl]-2-methyl-2,7-naphthyridin-1-one	CN1C=C(C2=C(C1=O)C=NC=C2)C3=C(C=C(C=C3OC)CN(C)C)OC	0.705825	1	1809.27
7-[(1R,2R,5R)-2-Hydroxy-5-[(E,3R)-3-hydroxyoct-1-enyl]cyclopentyl]heptanoic acid	CCCCC[C@H](/C=C/[C@H]1CC[C@H]([C@@H]1CCCCCCC(=O)O)O)O	0.345011	0.86493	1695.45
Roseoflavin	CC1=CC2=C(C=C1N(C)C)N(C3=NC(=O)NC(=O)C3=N2)C[C@@H]([C@@H]([C@@H](CO)O)O)O	0.292631	0.567913	1948.4
4-(2-((4-(2-(Pyridin-2-yl)-5,6-dihydro-4H-pyrrolo[1,2-b]pyrazol-3-yl)quinolin-7-yl)oxy)ethyl)morpholine	C1CC2=C(C(=NN2C1)C3=CC=CC=N3)C4=C5C=CC(=CC5=NC=C4)OCCN6CCOCC6	0.45332	0.879439	2491.77
2-(4-Iodo-2,5-dimethoxyphenyl)-N-(4-methoxybenzyl)ethan-1-amine	COC1=CC=C(C=C1)CNCCC2=CC(=C(C=C2OC)I)OC	0.516029	0.883133	1436.83
4-[(1S,2R,3As,8bS)-2-hydroxy-1-[(E,3S,4S)-3-hydroxy-4-methyloct-1-en-6-ynyl]-2,3,3a,8b-tetrahydro-1H-cyclopenta[b][1]benzofuran-5-yl]butanoic acid	CC#CC[C@H](C)[C@@H](/C=C/[C@@H]1[C@@H](C[C@H]2[C@@H]1C3=CC=CC(=C3O2)CCCC(=O)O)O)O	0.462068	0.82772	2016.03
2-[(1-{3-[4-(Biphenyl-4-ylcarbonyl)-2-propylphenoxy]propyl}-1,2,3,4-tetrahydroquinolin-5-yl)oxy]-2-methylpropanoic acid	CCCC1=C(C=CC(=C1)C(=O)C2=CC=C(C=C2)C3=CC=CC=C3)OCCCN4CCCC5=C4C=CC=C5OC(C)(C)C(=O)O	0.125428	0.578831	3394.72
(R)-6-Bromo-3-(1-methyl-1H-pyrazol-4-yl)-5-(piperidin-3-yl)pyrazolo[1,5-a]pyrimidin-7-amine	CN1C=C(C=N1)C2=C3N=C(C(=C(N3N=C2)N)Br)[C@@H]4CCCNC4	0.714098	0.914093	1560.15
N-[4-Chloro-3-(trifluoromethyl)phenyl]-N'-[[3-(4-fluorophenyl)-3,4-dihydro-4-oxo-2-quinazolinyl]methyl]urea	C1=CC=C2C(=C1)C(=O)N(C(=N2)CNC(=O)NC3=CC(=C(C=C3)Cl)C(F)(F)F)C4=CC=C(C=C4)F	0.369883	0.714683	2155.92
1-(5-Fluoropentyl)-N-(2-phenylpropan-2-yl)-1h-pyrrolo[2,3-b]pyridine-3-carboxamide	CC(C)(C1=CC=CC=C1)NC(=O)C2=CN(C3=C2C=CC=N3)CCCCCF	0.579134	0.974956	1948.38
Bromocriptine	CC(C)C[C@H]1C(=O)N2CCC[C@H]2[C@]3(N1C(=O)[C@](O3)(C(C)C)NC(=O)[C@H]4CN([C@@H]5CC6=C(NC7=CC=CC(=C67)C5=C4)Br)C)O	0.456327	0.593467	3226.59
4-[7-(1-Adamantyl)-6-(2-methoxyethoxymethoxy)naphthalen-2-yl]benzoic acid	COCCOCOC1=C(C=C2C=C(C=CC2=C1)C3=CC=C(C=C3)C(=O)O)C45CC6CC(C4)CC(C6)C5	0.270208	0.647504	2654.12
N-[(2r)-Butan-2-Yl]-1-(2-Chlorophenyl)-N-Methylisoquinoline-3-Carboxamide	CC[C@@H](C)N(C)C(=O)C1=CC2=CC=CC=C2C(=N1)C3=CC=CC=C3Cl	0.62721	0.971442	1750.63
(2R)-3-[(3E,7E)-4,8-Dimethyl-10-(2,6,6-trimethylcyclohexen-1-yl)deca-3,7-dienyl]-2-hydroxy-2H-furan-5-one	CC1=C(C(CCC1)(C)C)CC/C(=C/CC/C(=C/CCC2=CC(=O)O[C@H]2O)/C)/C	0.360971	0.818181	2077.11
4-(Benzhydryloxy)-1-[3-(1H-tetraazol-5-YL)propyl]piperidine	C1CN(CCC1OC(C2=CC=CC=C2)C3=CC=CC=C3)CCCC4=NNN=N4	0.651623	0.968178	1907.29
Birinapant	CC[C@@H](C(=O)N1C[C@H](C[C@H]1CC2=C(NC3=C2C=CC(=C3)F)C4=C(C5=C(N4)C=C(C=C5)F)C[C@@H]6C[C@@H](CN6C(=O)[C@H](CC)NC(=O)[C@H](C)NC)O)O)NC(=O)[C@H](C)NC	0.089861	0.400509	4343.35
2-(2-Chloro-4-fluorobenzyl)-3-(4-fluorophenyl)-7-(trifluoromethyl)-2H-indazole	C1=CC2=C(N(N=C2C(=C1)C(F)(F)F)CC3=C(C=C(C=C3)F)Cl)C4=CC=C(C=C4)F	0.335734	0.670805	1747.34
2,2,3,3-Tetramethyl-N-[4-[4-[[oxo-(2,2,3,3-tetramethylcyclopropyl)methyl]amino]phenyl]sulfonylphenyl]-1-cyclopropanecarboxamide	CC1(C(C1(C)C)C(=O)NC2=CC=C(C=C2)S(=O)(=O)C3=CC=C(C=C3)NC(=O)C4C(C4(C)C)(C)C)C	0.531698	0.685378	2347.19
RCS-4-C4 homolog	CCCCN1C=C(C2=CC=CC=C21)C(=O)C3=CC=C(C=C3)OC	0.619074	0.981667	1668.17
[1-[(2R)-2-Fluoropentyl]indol-3-yl]-naphthalen-1-ylmethanone	CCC[C@H](CN1C=C(C2=CC=CC=C21)C(=O)C3=CC=CC4=CC=CC=C43)F	0.377696	0.835013	2105.1
Desloratadine	C1CC2=C(C=CC(=C2)Cl)C(=C3CCNCC3)C4=C1C=CC=N4	0.794753	0.927014	1515.89
Antibiotic TS 155-2	C[C@H]1C/C(=C/C=C/[C@@H]([C@H](OC(=O)/C(=C/C(=C/[C@H]([C@H]1O)C)/C)/C)[C@@H](C)[C@H]([C@H](C)[C@]2(C[C@H]([C@@H]([C@H](O2)C(C)C)C)OC(=O)/C=C/C(=O)O)O)O)OC)/C	0.18156	0.424457	3706.01
4-[(3R)-3,5-Diphenyl-3,4-dihydropyrazol-2-yl]benzenesulfonamide	C1[C@@H](N(N=C1C2=CC=CC=C2)C3=CC=C(C=C3)S(=O)(=O)N)C4=CC=CC=C4	0.753315	0.9682	1914.04
R-(-)-Flecainide	C1CCN[C@H](C1)CNC(=O)C2=C(C=CC(=C2)OCC(F)(F)F)OCC(F)(F)F	0.671584	0.854009	1470.69
4-((4-(5-Methoxypyridin-2-yl)phenoxy)methyl)-5-methyl-N-(o-tolylsulfonyl)furan-2-carboxamide	CC1=CC=CC=C1S(=O)(=O)NC(=O)C2=CC(=C(O2)C)COC3=CC=C(C=C3)C4=NC=C(C=C4)OC	0.380944	0.761878	2499.39
CFI-400945 (free base)	C[C@@H]1CN(C[C@@H](O1)C)CC2=CC=C(C=C2)/C=C/C3=NNC4=C3C=CC(=C4)[C@@H]5C[C@]56C7=C(C=CC(=C7)OC)NC6=O	0.330421	0.677583	3128.63
S-(+)-Flecainide	C1CCN[C@@H](C1)CNC(=O)C2=C(C=CC(=C2)OCC(F)(F)F)OCC(F)(F)F	0.671584	0.854009	1470.69
(+/-)-Hypophyllanthin	COC[C@H]1CC2=CC(=C3C(=C2[C@H]([C@@H]1COC)C4=CC(=C(C=C4)OC)OC)OCO3)OC	0.63334	0.90029	2083.11
N-[(2S)-1-Amino-3-methyl-1-oxobutan-2-yl]-1-[(4R)-4-hydroxypentyl]indazole-3-carboxamide	C[C@H](CCCN1C2=CC=CC=C2C(=N1)C(=O)N[C@@H](C(C)C)C(=O)N)O	0.671421	0.824221	1697.94
(2S)-2-[4-Chloro-6-[(4-phenylphenyl)methylamino]pyrimidin-2-yl]sulfanyloctanoic acid	CCCCCC[C@@H](C(=O)O)SC1=NC(=CC(=N1)Cl)NCC2=CC=C(C=C2)C3=CC=CC=C3	0.129583	0.589888	2177.56
delta6-Testosterone enanthate	CCCCCCC(=O)O[C@H]1CC[C@@H]2[C@@]1(CC[C@H]3[C@H]2C=CC4=CC(=O)CC[C@]34C)C	0.396419	0.862744	2239.11
(2S)-N-[(2S)-1-[[(2S)-1-(2-Aminoethylamino)-1-oxopropan-2-yl]amino]-3-naphthalen-2-yl-1-oxopropan-2-yl]-N'-hydroxy-2-(2-methylpropyl)butanediamide	C[C@@H](C(=O)NCCN)NC(=O)[C@H](CC1=CC2=CC=CC=C2C=C1)NC(=O)[C@@H](CC(C)C)CC(=O)NO	0.17791	0.426223	2534.08
Neobavaisoflavone	CC(=CCC1=C(C=CC(=C1)C2=COC3=C(C2=O)C=CC(=C3)O)O)C	0.702043	0.921306	1683.52
Suvorexant	C[C@@H]1CCN(CCN1C(=O)C2=C(C=CC(=C2)C)N3N=CC=N3)C4=NC5=C(O4)C=CC(=C5)Cl	0.466943	0.863431	2218.07
(5-(3-Fluorophenyl)-1-pentyl-1H-pyrrol-3-yl)(naphthalen-1-yl)methanone	CCCCCN1C=C(C=C1C2=CC(=CC=C2)F)C(=O)C3=CC=CC4=CC=CC=C43	0.251284	0.751048	2216.09
Taurocholic acid	C[C@H](CCC(=O)NCCS(=O)(=O)O)[C@H]1CC[C@@H]2[C@@]1([C@H](C[C@H]3[C@H]2[C@@H](C[C@H]4[C@@]3(CC[C@H](C4)O)C)O)O)C	0.32744	0.454883	2675.59
3-[[(1R,3S)-3-Carboxycyclohexyl]carbamoyl]-4-[3-[4-(4-cyclohexyloxybutoxy)phenyl]propoxy]benzoic acid	C1CCC(CC1)OCCCCOC2=CC=C(C=C2)CCCOC3=C(C=C(C=C3)C(=O)O)C(=O)N[C@@H]4CCC[C@@H](C4)C(=O)O	0.193383	0.430627	3135.04
(E)-7-[(1R,2R,3S,5S)-3,5-Dihydroxy-2-[(E,3R)-3-hydroxy-5-phenylpent-1-enyl]cyclopentyl]-N-ethylhept-5-enamide	CCNC(=O)CCC/C=C/C[C@H]1[C@H](C[C@@H]([C@@H]1/C=C/[C@@H](CCC2=CC=CC=C2)O)O)O	0.311844	0.757305	2174.71
2-Methyl-8-(phenylmethoxy)imidazo[1,2-a]pyridine-3-acetonitrile	CC1=C(N2C=CC=C(C2=N1)OCC3=CC=CC=C3)CC#N	0.734952	1	1422.21
[1-[(2S)-2-Fluoropentyl]indol-3-yl]-naphthalen-1-ylmethanone	CCC[C@@H](CN1C=C(C2=CC=CC=C21)C(=O)C3=CC=CC4=CC=CC=C43)F	0.377696	0.835013	2105.1
1-Boc-4-[1-(4-tert-butoxycarbonyl-benzyl)-1H-indol-4-yl]piperazine	CC(C)(C)OC(=O)C1=CC=C(C=C1)CN2C=CC3=C2C=CC=C3N4CCN(CC4)C(=O)OC(C)(C)C	0.4381	0.774347	2622.82
Nemiralisib	CC(C)N1CCN(CC1)CC2=CN=C(O2)C3=C4C=NNC4=CC(=C3)C5=C6C=CNC6=CC=C5	0.406817	0.802525	2627.19
[(1S,4R,5S)-4-[2,6-Dimethoxy-4-(2-methyloctan-2-yl)phenyl]-6,6-dimethyl-2-bicyclo[3.1.1]hept-2-enyl]methanol	CCCCCCC(C)(C)C1=CC(=C(C(=C1)OC)[C@@H]2C=C([C@H]3C[C@@H]2C3(C)C)CO)OC	0.344827	0.761182	2257.38
3-[[(1S,3R)-3-Carboxycyclohexyl]carbamoyl]-4-[3-[4-(4-cyclohexyloxybutoxy)phenyl]propoxy]benzoic acid	C1CCC(CC1)OCCCCOC2=CC=C(C=C2)CCCOC3=C(C=C(C=C3)C(=O)O)C(=O)N[C@H]4CCC[C@H](C4)C(=O)O	0.193383	0.430627	3135.04
N'-[(3Z)-6-Methoxy-1-pentyl-2-oxo-1,2-dihydro-3H-indol-3-ylidene]benzohydrazide	CCCCCN1C2=C(C=CC(=C2)OC)C(=C1O)N=NC(=O)C3=CC=CC=C3	0.4454	0.954784	1880.39
Cumyl-PICA	CCCCCN1C=C(C2=CC=CC=C21)C(=O)NC(C)(C)C3=CC=CC=C3	0.562325	0.944583	1989.86
(2S)-N-[(2S)-1-[[(2S)-1-(2-Aminoethylamino)-1-oxopropan-2-yl]amino]-3,3-dimethyl-1-oxobutan-2-yl]-N'-hydroxy-2-(2-methylpropyl)butanediamide	C[C@@H](C(=O)NCCN)NC(=O)[C@H](C(C)(C)C)NC(=O)[C@@H](CC(C)C)CC(=O)NO	0.199583	0.543194	1782.97
3-[[(1R,3R)-3-Carboxycyclohexyl]carbamoyl]-4-[3-[4-(4-cyclohexyloxybutoxy)phenyl]propoxy]benzoic acid	C1CCC(CC1)OCCCCOC2=CC=C(C=C2)CCCOC3=C(C=C(C=C3)C(=O)O)C(=O)N[C@@H]4CCC[C@H](C4)C(=O)O	0.193383	0.430627	3135.04
Esuberaprost	CC#CC[C@H](C)[C@@H](/C=C/[C@H]1[C@@H](C[C@H]2[C@@H]1C3=CC=CC(=C3O2)CCCC(=O)O)O)O	0.462068	0.82772	2016.03
Quinolin-8-yl 1-[(4R)-4-fluoropentyl]indole-3-carboxylate	C[C@H](CCCN1C=C(C2=CC=CC=C21)C(=O)OC3=CC=CC4=C3N=CC=C4)F	0.327429	0.964859	2080.09
(S)-5-(((5-Chloro-2-methylpyridin-3-yl)amino)methyl)-N-(3-cyclopentyl-1-(cyclopropylamino)-1-oxopropan-2-yl)thiophene-2-carboxamide	CC1=C(C=C(C=N1)Cl)NCC2=CC=C(S2)C(=O)N[C@@H](CC3CCCC3)C(=O)NC4CC4	0.507209	0.713386	2116.21
(5E)-5-[(3As,4R,5R,6aR)-5-hydroxy-4-[(E,4R)-4-methyl-3-oxooct-1-en-6-ynyl]-3,3a,4,5,6,6a-hexahydro-1H-pentalen-2-ylidene]pentanoic acid	CC#CC[C@@H](C)C(=O)/C=C/[C@H]1[C@@H](C[C@@H]2[C@@H]1C/C(=C/CCCC(=O)O)/C2)O	0.299869	0.921306	1795.51
(E)-7-[(1S,2R,3S,5S)-3,5-Dihydroxy-2-[(E,3R)-3-hydroxy-5-phenylpent-1-enyl]cyclopentyl]-N-ethylhept-5-enamide	CCNC(=O)CCC/C=C/C[C@@H]1[C@H](C[C@@H]([C@@H]1/C=C/[C@@H](CCC2=CC=CC=C2)O)O)O	0.311844	0.757305	2174.71
Natamycin	C[C@@H]1C/C=C/C=C/C=C/C=C/[C@@H](C[C@H]2[C@@H]([C@H](C[C@](O2)(C[C@H](C[C@@H]3[C@H](O3)/C=C/C(=O)O1)O)O)O)C(=O)O)O[C@H]4[C@H]([C@H]([C@@H]([C@H](O4)C)O)N)O	0.156889	0.400441	3236.58
(1-Hexyl-5-phenyl-1H-pyrrol-3-yl)(naphthalen-1-yl)methanone	CCCCCCN1C=C(C=C1C2=CC=CC=C2)C(=O)C3=CC=CC4=CC=CC=C43	0.23516	0.742094	2314.44
4-(alpha-(4-Allyl-2,5-dimethyl-1-piperazinyl)-3-methoxybenzyl)-N,N-diethylbenzamide	CCN(CC)C(=O)C1=CC=C(C=C1)[C@H](C2=CC(=CC=C2)OC)N3C[C@H](N(C[C@@H]3C)CC=C)C	0.513071	0.861597	2475.17
4-[(1S,2R,3As,8bS)-2-hydroxy-1-[(E,3S,4R)-3-hydroxy-4-methyloct-1-en-6-ynyl]-2,3,3a,8b-tetrahydro-1H-cyclopenta[b][1]benzofuran-5-yl]butanoic acid	CC#CC[C@@H](C)[C@@H](/C=C/[C@@H]1[C@@H](C[C@H]2[C@@H]1C3=CC=CC(=C3O2)CCCC(=O)O)O)O	0.462068	0.82772	2016.03
(1-(4-Cyanobutyl)-3-(naphthalen-1-oyl)indole)	C1=CC=C2C(=C1)C=CC=C2C(=O)C3=CN(C4=CC=CC=C43)CCCCC#N	0.328997	0.954403	2100.72
Valsartan	CCCCC(=O)N(CC1=CC=C(C=C1)C2=CC=CC=C2C3=NNN=N3)[C@@H](C(C)C)C(=O)O	0.494432	0.764451	2220.37
JWH-081PentanoicAcid	COC1=CC=C(C2=CC=CC=C21)C(=O)C3=CN(C4=CC=CC=C43)CCCCC(=O)O	0.321754	0.925839	2257.11
Elaidic acid	CCCCCCCC/C=C/CCCCCCCC(=O)O	0.290517	0.88288	1442.28
JWH 073 4-hydroxyindole metabolite	CCCCN1C=C(C2=C1C=CC=C2O)C(=O)C3=CC=CC4=CC=CC=C43	0.484038	0.950182	2018.48
4-(6-(4-(Piperazin-1-yl)phenyl)pyrazolo[1,5-a]pyrimidin-3-yl)quinoline	C1CN(CCN1)C2=CC=C(C=C2)C3=CN4C(=C(C=N4)C5=CC=NC6=CC=CC=C56)N=C3	0.490424	0.92463	2386.93
Resminostat	CN(C)CC1=CC=C(C=C1)S(=O)(=O)N2C=CC(=C2)/C=C/C(=O)NO	0.465983	0.921008	1568.05
3-((3-Fluoro-5-(4-methoxytetrahydro-2H-pyran-4-yl)phenoxy)methyl)-1-(4-(methylsulfonyl)phenyl)-5-phenyl-1H-pyrazole	COC1(CCOCC1)C2=CC(=CC(=C2)F)OCC3=NN(C(=C3)C4=CC=CC=C4)C5=CC=C(C=C5)S(=O)(=O)C	0.303618	0.793065	2791.99
(4As,6aR,6aR,6bR,8aR,10R,11S,12aR,14bS)-10,11-dihydroxy-2,2,6a,6b,9,9,12a-heptamethyl-1,3,4,5,6,6a,7,8,8a,10,11,12,13,14b-tetradecahydropicene-4a-carboxylic acid	C[C@@]12CC[C@@H]3[C@@]([C@H]1CC=C4[C@@]2(CC[C@@]5([C@H]4CC(CC5)(C)C)C(=O)O)C)(C[C@@H]([C@@H](C3(C)C)O)O)C	0.396846	0.596026	2684.3
2-Methyl-2-[[1-[3-[3-(4-phenylbenzoyl)-5-propylphenoxy]propyl]-3,4-dihydro-2H-quinolin-5-yl]oxy]propanoic acid	CCCC1=CC(=CC(=C1)OCCCN2CCCC3=C2C=CC=C3OC(C)(C)C(=O)O)C(=O)C4=CC=C(C=C4)C5=CC=CC=C5	0.125428	0.578831	3394.72
Cyclohexanecarboxamide, n-[2-[4-(2-methoxyphenyl)-1-piperazinyl]ethyl]-n-2-pyridinyl-	COC1=CC=CC=C1N2CCN(CC2)CCN(C3=CC=CC=N3)C(=O)C4CCCCC4	0.678835	0.916107	2247.09
N-Benzyl-2-[[(Z)-(2-oxonaphthalen-1-ylidene)methyl]amino]-4,5,6,7-tetrahydro-1-benzothiophene-3-carboxamide	C1CCC2=C(C1)C(=C(S2)N=CC3=C(C=CC4=CC=CC=C43)O)C(=O)NCC5=CC=CC=C5	0.364821	0.703804	2395.15
Kibdelone B	CCCC1=C(C2=C(C(=O)C3=C(C2=O)CCC4=C3C(=C5C(=C4OC)OC6=C(C5=O)[C@H]([C@H](C[C@@H]6O)O)O)O)C(=O)N1C)Cl	0.357931	0.430387	2883.03
NNC-55-0396 Free base	CC(C)[C@H]1C2=C(CC[C@@]1(CCN(C)CCCC3=NC4=CC=CC=C4N3)OC(=O)C5CC5)C=C(C=C2)F	0.351695	0.711635	2833.07
Flubromazolam	CC1=NN=C2N1C3=C(C=C(C=C3)Br)C(=NC2)C4=CC=CC=C4F	0.652705	0.996538	1433.94
4-[(3S)-3,5-Diphenyl-3,4-dihydropyrazol-2-yl]benzenesulfonamide	C1[C@H](N(N=C1C2=CC=CC=C2)C3=CC=C(C=C3)S(=O)(=O)N)C4=CC=CC=C4	0.753315	0.9682	1914.04
JWH 122 6-methylnaphthyl isomer	CCCCCN1C=C(C2=CC=CC=C21)C(=O)C3=CC=CC4=C3C=CC(=C4)C	0.284784	0.796	2205.46
Centchroman	CC1([C@@H]([C@H](C2=C(O1)C=C(C=C2)OC)C3=CC=C(C=C3)OCCN4CCCC4)C5=CC=CC=C5)C	0.419187	0.724525	2551.22
Cimetidine	CC1=C(N=CN1)CSCCNC(=NC)NC#N	0.234659	0.86493	941.287
JWH-122 N-(5-hydroxypentyl)metabolite	CC1=CC=C(C2=CC=CC=C12)C(=O)C3=CN(C4=CC=CC=C43)CCCCCO	0.344377	0.949678	2233.58
Quinolin-8-yl 1-[(2S)-2-fluoropentyl]indole-3-carboxylate	CCC[C@@H](CN1C=C(C2=CC=CC=C21)C(=O)OC3=CC=CC4=C3N=CC=C4)F	0.327429	0.964859	2080.09
(E)-7-[(1S,2R,3R,5S)-3,5-Dihydroxy-2-[(E,3R)-3-hydroxy-5-phenylpent-1-enyl]cyclopentyl]-N-ethylhept-5-enamide	CCNC(=O)CCC/C=C/C[C@@H]1[C@H](C[C@H]([C@@H]1/C=C/[C@@H](CCC2=CC=CC=C2)O)O)O	0.311844	0.757305	2174.71
(E)-7-[(1R,2R,3R,5S)-3,5-Dihydroxy-2-[(E,3R)-3-hydroxy-5-phenylpent-1-enyl]cyclopentyl]-N-ethylhept-5-enamide	CCNC(=O)CCC/C=C/C[C@H]1[C@H](C[C@H]([C@@H]1/C=C/[C@@H](CCC2=CC=CC=C2)O)O)O	0.311844	0.757305	2174.71
2-[2-[2-[6-[Bis(carboxymethyl)amino]-2,3-difluorophenoxy]ethoxy]-N-(carboxymethyl)-4-(2,7-dichloro-3-hydroxy-6-oxoxanthen-9-yl)anilino]acetic acid	C1=CC(=C(C=C1C2=C3C=C(C(=O)C=C3OC4=CC(=C(C=C42)Cl)O)Cl)OCCOC5=C(C=CC(=C5F)F)N(CC(=O)O)CC(=O)O)N(CC(=O)O)CC(=O)O	0.0634615	0.401926	3431.91
Flibanserin	C1CN(CCN1CCN2C3=CC=CC=C3NC2=O)C4=CC=CC(=C4)C(F)(F)F	0.744373	0.952394	1942
JWH 398 2-chloronaphthyl isomer	CCCCCN1C=C(C2=CC=CC=C21)C(=O)C3=C(C=CC4=CC=CC=C43)Cl	0.266004	0.761363	2105.1
N-(N-(3-Carboxyoxirane-2-carbonyl)leucyl)isoamylamine	CC(C)CCNC(=O)[C@H](CC(C)C)NC(=O)[C@@H]1[C@H](O1)C(=O)O	0.538086	0.831884	1276.1
4-(4-Cyano-2-fluorophenyl)-2-morpholino-5-(1H-1,2,4-triazol-5-yl)thiophene-3-carbonitrile	C1COCCN1C2=C(C(=C(S2)C3=NC=NN3)C4=C(C=C(C=C4)C#N)F)C#N	0.749576	0.950805	1601.86
trans-Vaccenic acid	CCCCCC/C=C/CCCCCCCCCC(=O)O	0.290517	0.88288	1442.28
Quinolin-8-yl 1-[(2R)-2-fluoropentyl]indole-3-carboxylate	CCC[C@H](CN1C=C(C2=CC=CC=C21)C(=O)OC3=CC=CC4=C3N=CC=C4)F	0.327429	0.964859	2080.09
Campesterol	C[C@H](CC[C@@H](C)C(C)C)[C@H]1CC[C@@H]2[C@@]1(CC[C@H]3[C@H]2CC=C4[C@@]3(CC[C@@H](C4)O)C)C	0.470129	0.664331	2442.62
TCS JNK 5a	C1CCC2=C(C1)C(=C(S2)NC(=O)C3=CC=CC4=CC=CC=C43)C#N	0.725125	0.976499	1680.54
(2R,3R)-2-[[1-(Cyclohexylmethyl)indazole-3-carbonyl]amino]-3-methylbutanedioic acid	C[C@H]([C@H](C(=O)O)NC(=O)C1=NN(C2=CC=CC=C21)CC3CCCCC3)C(=O)O	0.671072	0.760242	1861.44
9H-Purine-2,6-diamine, N2-(2-aminocyclohexyl)-N6-(3-chlorophenyl)-9-ethyl-, cis-	CCN1C=NC2=C(N=C(N=C21)N[C@@H]3CCCC[C@@H]3N)NC4=CC(=CC=C4)Cl	0.615774	0.845636	1882.59
(5E)-5-[(3As,4R,5R,6aS)-5-hydroxy-4-[(E,4R)-4-methyl-3-oxooct-1-en-6-ynyl]-3,3a,4,5,6,6a-hexahydro-1H-pentalen-2-ylidene]pentanoic acid	CC#CC[C@@H](C)C(=O)/C=C/[C@H]1[C@@H](C[C@H]2[C@@H]1C/C(=C/CCCC(=O)O)/C2)O	0.299869	0.921306	1795.51
5-[3-[[(2R)-1-Amino-3-methyl-1-oxobutan-2-yl]carbamoyl]indazol-1-yl]pentanoic acid	CC(C)[C@H](C(=O)N)NC(=O)C1=NN(C2=CC=CC=C21)CCCCC(=O)O	0.584423	0.757218	1701.27
Ascochlorin	C[C@@H]1CCC(=O)[C@@H]([C@@]1(C)/C=C/C(=C/CC2=C(C(=C(C(=C2O)Cl)C)C=O)O)/C)C	0.497336	0.843515	1896.39
(2R)-2-({9-(1-Methylethyl)-6-[(4-pyridin-2-ylbenzyl)amino]-9H-purin-2-yl}amino)butan-1-ol	CC[C@H](CO)NC1=NC(=C2C(=N1)N(C=N2)C(C)C)NCC3=CC=C(C=C3)C4=CC=CC=N4	0.363859	0.750666	2347.05
cis-4-(2,2,3-Trimethylcyclopentyl)butanoic acid	C[C@H]1CC[C@H](C1(C)C)CCCC(=O)O	0.752075	0.974685	878.175
Tipranavir	CCC[C@]1(CC(=C(C(=O)O1)[C@H](CC)C2=CC(=CC=C2)NS(=O)(=O)C3=NC=C(C=C3)C(F)(F)F)O)CCC4=CC=CC=C4	0.222837	0.509489	3021.58
Thaxtomin A	CN1[C@H](C(=O)N([C@](C1=O)(CC2=CC(=CC=C2)O)O)C)CC3=CNC4=C3C(=CC=C4)[N+](=O)[O-]	0.407901	0.599867	2151.99
(4As,6aS,6aR,6bR,8aS,10R,11S,12aR,14bS)-10,11-dihydroxy-2,2,6a,6b,9,9,12a-heptamethyl-1,3,4,5,6,6a,7,8,8a,10,11,12,13,14b-tetradecahydropicene-4a-carboxylic acid	C[C@@]12CC[C@H]3[C@@]([C@@H]1CC=C4[C@@]2(CC[C@@]5([C@H]4CC(CC5)(C)C)C(=O)O)C)(C[C@@H]([C@@H](C3(C)C)O)O)C	0.396846	0.596026	2684.3
CID 72706947	CCC#CC[C@H](C)[C@@H](/C=C/[C@H]1CCC(=O)N1CCCCCCC(=O)O)O	0.335112	0.920967	1766.21
(2S,3R,4S,5S)-1-[5-(1-Adamantylmethoxy)pentyl]-2-(hydroxymethyl)piperidine-3,4,5-triol	C1[C@@H]([C@@H]([C@@H]([C@@H](N1CCCCCOCC23CC4CC(C2)CC(C4)C3)CO)O)O)O	0.436302	0.790214	1911.68
1-Pentyl-3-(8-bromo-1-naphthoyl)indole	CCCCCN1C=C(C2=CC=CC=C21)C(=O)C3=CC=CC4=C3C(=CC=C4)Br	0.243698	0.68226	2105.1
3-Hydroxy-4-[(E)-{2-Sulfo-4-[(E)-(4-Sulfophenyl)diazenyl]phenyl}diazenyl]naphthalene-2,7-Disulfonic Acid	C1=CC(=CC=C1N=NC2=CC(=C(C=C2)N=NC3=C4C=CC(=CC4=CC(=C3O)S(=O)(=O)O)S(=O)(=O)O)S(=O)(=O)O)S(=O)(=O)O	0.128503	0.408788	2984.47
1-(4-Pentenyl)-3-(1-naphthoyl)indole	C=CCCCN1C=C(C2=CC=CC=C21)C(=O)C3=CC=CC4=CC=CC=C43	0.240094	0.855708	2081.1
(2R,3R)-2-[(3S,8S,9R,10R,13S,14S,17S)-3-Hydroxy-10,13-dimethyl-2,3,4,7,8,9,11,12,14,15,16,17-dodecahydro-1H-cyclopenta[a]phenanthren-17-yl]-6-methylheptane-2,3-diol	CC(C)CC[C@H]([C@@](C)([C@H]1CC[C@@H]2[C@@]1(CC[C@@H]3[C@H]2CC=C4[C@@]3(CC[C@@H](C4)O)C)C)O)O	0.518547	0.767656	2389.35
N-[(2R)-1-Amino-3-methyl-1-oxobutan-2-yl]-1-(5-hydroxypentyl)indazole-3-carboxamide	CC(C)[C@H](C(=O)N)NC(=O)C1=NN(C2=CC=CC=C21)CCCCCO	0.596656	0.824221	1699.45
Fedratinib	CC1=CN=C(N=C1NC2=CC(=CC=C2)S(=O)(=O)NC(C)(C)C)NC3=CC=C(C=C3)OCCN4CCCC4	0.346333	0.634991	2732.89
(5R)-5-[(E,3S)-4,4-Difluoro-3-hydroxy-4-phenylbut-1-enyl]-1-[6-(2H-tetrazol-5-yl)hexyl]pyrrolidin-2-one	C1CC(=O)N([C@H]1/C=C/[C@@H](C(C2=CC=CC=C2)(F)F)O)CCCCCCC3=NNN=N3	0.431291	0.840913	1975.89
(3S,8S,9S,10R,13S,14S,17R)-17-[(2R,3S)-3-Hydroxy-6-methylheptan-2-yl]-10,13-dimethyl-2,3,4,7,8,9,11,12,14,15,16,17-dodecahydro-1H-cyclopenta[a]phenanthren-3-ol	C[C@H]([C@H]1CC[C@@H]2[C@@]1(CC[C@H]3[C@H]2CC=C4[C@@]3(CC[C@@H](C4)O)C)C)[C@H](CCC(C)C)O	0.525292	0.756007	2366.83
2-Trifluoromethyl-2'-methoxychalcone	COC1=CC=CC=C1C(=O)/C=C/C2=CC=CC=C2C(F)(F)F	0.60884	0.958175	1266.31
(4S)-6-Amino-1,3-dimethyl-4-[4-(trifluoromethyl)phenyl]-4H-pyrano[2,3-c]pyrazole-5-carbonitrile	CC1=NN(C2=C1[C@@H](C(=C(O2)N)C#N)C3=CC=C(C=C3)C(F)(F)F)C	0.869692	0.976499	1341.59
Verlukastum	CN(C)C(=O)CCS[C@@H](C1=CC=CC(=C1)/C=C/C2=NC3=C(C=CC(=C3)Cl)C=C2)SCCC(=O)O	0.29531	0.650811	2338.1
Syk Inhibitor II	C1=CC(=CC(=C1)NC2=NC(=NC=C2C(=O)N)NCCN)C(F)(F)F	0.635518	0.752617	1294.11
MDL-201053, (D-alanine)-	C[C@H](C(=O)CF)NC(=O)[C@H](CC1=CC=CC=C1)NC(=O)OCC2=CC=CC=C2	0.693764	0.902823	1739.66
N-[4-(1,1,1,3,3,3-Hexafluoro-2-hydroxypropan-2-yl)phenyl]-2-thiophenesulfonamide	C1=CSC(=C1)S(=O)(=O)NC2=CC=C(C=C2)C(C(F)(F)F)(C(F)(F)F)O	0.759599	0.871629	1205.44
[1-[(2R)-Heptan-2-yl]-2-methylindol-3-yl]-naphthalen-1-ylmethanone	CCCCC[C@@H](C)N1C(=C(C2=CC=CC=C21)C(=O)C3=CC=CC4=CC=CC=C43)C	0.239456	0.727932	2404.66
IKK-3 Inhibitor	COC1=C(C=C2C(=C1)N=CN2C3=CC(=C(S3)C#N)OCC4=CC=CC=C4S(=O)(=O)C)OC	0.403516	0.81868	2249.77
Taurodeoxycholic acid	C[C@H](CCC(=O)NCCS(=O)(=O)O)[C@H]1CC[C@@H]2[C@@]1([C@H](C[C@H]3[C@H]2CC[C@H]4[C@@]3(CC[C@H](C4)O)C)O)C	0.398162	0.545862	2650.15
Caylin-2	CC(C)OC1=C(C=CC(=C1)OC)C2=N[C@H]([C@H](N2C(=O)N3CCNC(=O)C3)C4=CC=C(C=C4)C(F)(F)F)C5=CC=C(C=C5)C(F)(F)F	0.305034	0.630644	2944.42
(S,E)-3-(((3-(2-(7-Chloroquinolin-2-yl)vinyl)phenyl)((3-(dimethylamino)-3-oxopropyl)thio)methyl)thio)propanoic acid	CN(C)C(=O)CCS[C@H](C1=CC=CC(=C1)/C=C/C2=NC3=C(C=CC(=C3)Cl)C=C2)SCCC(=O)O	0.29531	0.650811	2338.1
2-(4-Nitrophenyl)-5,6,7,8-tetrahydroimidazo[2,1-b][1,3]benzothiazole	C1CCC2=C(C1)N3C=C(N=C3S2)C4=CC=C(C=C4)[N+](=O)[O-]	0.533156	1	1381.65
JWH 210 2-ethylnaphthyl isomer	CCCCCN1C=C(C2=CC=CC=C21)C(=O)C3=C(C=CC4=CC=CC=C43)CC	0.259906	0.772061	2309.63
(4As,6aR,6aR,6bR,8aS,10R,11S,12aR,14bS)-10,11-dihydroxy-2,2,6a,6b,9,9,12a-heptamethyl-1,3,4,5,6,6a,7,8,8a,10,11,12,13,14b-tetradecahydropicene-4a-carboxylic acid	C[C@@]12CC[C@H]3[C@@]([C@H]1CC=C4[C@@]2(CC[C@@]5([C@H]4CC(CC5)(C)C)C(=O)O)C)(C[C@@H]([C@@H](C3(C)C)O)O)C	0.396846	0.596026	2684.3
3-(((3-(4-((Methylsulfonyl)amino)phenyl)-4-oxo-4H-chromen-7-yl)oxy)methyl)benzoic acid	CS(=O)(=O)NC1=CC=C(C=C1)C2=COC3=C(C2=O)C=CC(=C3)OCC4=CC(=CC=C4)C(=O)O	0.421011	0.673528	2366.65
1-Pentyl-3-(4-methoxybenzoyl)indole	CCCCCN1C=C(C2=CC=CC=C21)C(=O)C3=CC=C(C=C3)OC	0.449146	0.981162	1768.7
N-(3-Bromophenyl)-1H-imidazo[4,5-g]quinazolin-8-amine	C1=CC(=CC(=C1)Br)NC2=NC=NC3=CC4=C(C=C32)NC=N4	0.578561	0.921306	1392.82
(R)-Ranolazine	CC1=C(C(=CC=C1)C)NC(=O)CN2CCN(CC2)C[C@H](COC3=CC=CC=C3OC)O	0.639855	0.827436	2113.36
N-[(2S)-1-Amino-2,3-dimethyl-1-oxobutan-2-yl]-1-pentylindazole-3-carboxamide	CCCCCN1C2=CC=CC=C2C(=N1)C(=O)N[C@@](C)(C(C)C)C(=O)N	0.72155	0.921306	1767.68
Foradil	C[C@@H](CC1=CC=C(C=C1)OC)NC[C@H](C2=CC(=C(C=C2)O)NC=O)O	0.413602	0.826992	1600.45
Virginiamycin factor S	CC[C@@H]1C(=O)N2CCC[C@H]2C(=O)N([C@H](C(=O)N3CCC(=O)C[C@H]3C(=O)N[C@H](C(=O)O[C@@H]([C@@H](C(=O)N1)NC(=O)C4=C(C=CC=N4)O)C)C5=CC=CC=C5)CC6=CC=CC=C6)C	0.258717	0.427075	4400.21
Dexamethasone phosphate	C[C@@H]1C[C@H]2[C@@H]3CCC4=CC(=O)C=C[C@@]4([C@]3([C@H](C[C@@]2([C@]1(C(=O)COP(=O)(O)O)O)C)O)F)C	0.455594	0.507803	2095.49
Brigatinib	CN1CCN(CC1)C2CCN(CC2)C3=CC(=C(C=C3)NC4=NC=C(C(=N4)NC5=CC=CC=C5P(=O)(C)C)Cl)OC	0.352192	0.720685	2955.3
4-Methyl-3-(1-methyl-6-(pyridin-3-yl)-1H-pyrazolo[3,4-d]pyrimidin-4-ylamino)-N-(3-(trifluoromethyl)phenyl)benzamide	CC1=C(C=C(C=C1)C(=O)NC2=CC=CC(=C2)C(F)(F)F)NC3=C4C=NN(C4=NC(=N3)C5=CN=CC=C5)C	0.317106	0.677563	2540.11
(S)-2-(2-(3,5-Difluorophenyl)acetamido)-N-((S)-5-methyl-6-oxo-6,7-dihydro-5H-dibenzo[b,d]azepin-7-yl)propanamide	C[C@@H](C(=O)N[C@H]1C2=CC=CC=C2C3=CC=CC=C3N(C1=O)C)NC(=O)CC4=CC(=CC(=C4)F)F	0.607994	0.7665	2273.39
1-(3-((((2R,3S,4R,5R)-5-(4-Amino-5-bromo-7H-pyrrolo[2,3-d]pyrimidin-7-yl)-3,4-dihydroxytetrahydrofuran-2-yl)methyl)(isopropyl)amino)propyl)-3-(4-(tert-butyl)phenyl)urea	CC(C)N(CCCNC(=O)NC1=CC=C(C=C1)C(C)(C)C)C[C@@H]2[C@H]([C@H]([C@@H](O2)N3C=C(C4=C(N=CN=C43)N)Br)O)O	0.228417	0.434475	2843.13
(2S,3R)-2-[[1-(Cyclohexylmethyl)indazole-3-carbonyl]amino]-3-methylbutanedioic acid	C[C@H]([C@@H](C(=O)O)NC(=O)C1=NN(C2=CC=CC=C21)CC3CCCCC3)C(=O)O	0.671072	0.760242	1861.44
2-(4-Methyl-1,4-diazepan-1-yl)-N-((5-methylpyrazin-2-yl)methyl)-5-oxo-5H-benzo[4,5]thiazolo[3,2-a][1,8]naphthyridine-6-carboxamide	CC1=CN=C(C=N1)CNC(=O)C2=C3N(C4=CC=CC=C4S3)C5=C(C2=O)C=CC(=N5)N6CCCN(CC6)C	0.394218	0.780425	2907.47
[4-(5-Sulfanylidenedithiol-3-yl)phenyl] 2-[1-(4-chlorobenzoyl)-5-methoxy-2-methylindol-3-yl]acetate	CC1=C(C2=C(N1C(=O)C3=CC=C(C=C3)Cl)C=CC(=C2)OC)CC(=O)OC4=CC=C(C=C4)C5=CC(=S)SS5	0.0903946	0.602993	2588.52
2-[[(1S)-4-[5-(3,4-Diethoxyphenyl)-1,2,4-oxadiazol-3-yl]-2,3-dihydro-1H-inden-1-yl]amino]ethanol	CCOC1=C(C=C(C=C1)C2=NC(=NO2)C3=C4CC[C@@H](C4=CC=C3)NCCO)OCC	0.555941	0.863643	2094.2
N-[2-[[(3R)-2-Oxoazepan-3-yl]carbamoyl]phenyl]-1-benzothiophene-2-carboxamide	C1CCNC(=O)[C@@H](C1)NC(=O)C2=CC=CC=C2NC(=O)C3=CC4=CC=CC=C4S3	0.618066	0.811136	2017.99
(20R)-17,20-Dihydroxypregn-4-en-3-one	C[C@H]([C@]1(CC[C@@H]2[C@@]1(CC[C@H]3[C@H]2CCC4=CC(=O)CC[C@]34C)C)O)O	0.77074	0.921306	1770.81
(1S,9S,13R)-1,13-Dimethyl-10-(3-methylbut-2-enyl)-10-azatricyclo[7.3.1.02,7]trideca-2(7),3,5-trien-4-ol	C[C@H]1[C@@H]2CC3=C([C@]1(CCN2CC=C(C)C)C)C=C(C=C3)O	0.833526	0.918633	1528.13
JWH 200 4-hydroxyindole metabolite	C1COCCN1CCN2C=C(C3=C2C=CC=C3O)C(=O)C4=CC=CC5=CC=CC=C54	0.513449	0.935793	2283.35
Methyl (2S)-2-[[4-[[(2R)-2-amino-3-sulfanylpropyl]amino]-2-phenylbenzoyl]amino]-4-methylsulfanylbutanoate	COC(=O)[C@H](CCSC)NC(=O)C1=C(C=C(C=C1)NC[C@H](CS)N)C2=CC=CC=C2	0.312531	0.694596	1963.66
1-[1-[(4S)-4-Hydroxypentyl]indol-3-yl]-2-(2-methoxyphenyl)ethanone	C[C@@H](CCCN1C=C(C2=CC=CC=C21)C(=O)CC3=CC=CC=C3OC)O	0.6178	0.976499	1924.66
[5-(2-Fluorophenyl)-1-pentylpyrrol-2-yl]-naphthalen-1-ylmethanone	CCCCCN1C(=CC=C1C(=O)C2=CC=CC3=CC=CC=C32)C4=CC=CC=C4F	0.251284	0.751048	2216.09
9-[(1R)-1-Anilinoethyl]-7-methyl-2-morpholin-4-ylpyrido[1,2-a]pyrimidin-4-one	CC1=CN2C(=O)C=C(N=C2C(=C1)[C@@H](C)NC3=CC=CC=C3)N4CCOCC4	0.77117	0.97595	1966.73
4(3H)-Quinazolinone, 3-(2-chlorophenyl)-2-(2-(6-((diethylamino)methyl)-2-pyridinyl)ethenyl)-6-fluoro-	CCN(CC)CC1=NC(=CC=C1)/C=C/C2=NC3=C(C=C(C=C3)F)C(=O)N2C4=CC=CC=C4Cl	0.359228	0.814389	2406.08
3,4-Dihydro-6-[[4-[[[3-(methylsulfonyl)phenyl]methyl]amino]-5-(trifluoromethyl)-2-pyrimidinyl]amino]-2(1H)-quinolinone	CS(=O)(=O)C1=CC=CC(=C1)CNC2=NC(=NC=C2C(F)(F)F)NC3=CC4=C(C=C3)NC(=O)CC4	0.47505	0.631813	2238.13
Pyrimidine-4,6-dicarboxylic acid bis-(4-fluoro-3-methyl-benzylamide)	CC1=C(C=CC(=C1)CNC(=O)C2=CC(=NC=N2)C(=O)NCC3=CC(=C(C=C3)F)C)F	0.653603	0.861802	1801.1
Triamcinolone acetonide	C[C@]12C[C@@H]([C@]3([C@H]([C@@H]1C[C@@H]4[C@]2(OC(O4)(C)C)C(=O)CO)CCC5=CC(=O)C=C[C@@]53C)F)O	0.693508	0.812783	2091.42
(2R,3S)-2-[[1-(Cyclohexylmethyl)indazole-3-carbonyl]amino]-3-methylbutanedioic acid	C[C@@H]([C@H](C(=O)O)NC(=O)C1=NN(C2=CC=CC=C21)CC3CCCCC3)C(=O)O	0.671072	0.760242	1861.44
N-{(2r)-2-[2-(Hydroxyamino)-2-Oxoethyl]-4-Methylpentanoyl}-3-Methyl-L-Valyl-N-(2-Aminoethyl)-L-Alaninamide	C[C@@H](C(=O)NCCN)NC(=O)[C@H](C(C)(C)C)NC(=O)[C@H](CC(C)C)CC(=O)NO	0.199583	0.543194	1782.97
5-[3-[[(2R)-1-Amino-3,3-dimethyl-1-oxobutan-2-yl]carbamoyl]indazol-1-yl]pentanoic acid	CC(C)(C)[C@H](C(=O)N)NC(=O)C1=NN(C2=CC=CC=C21)CCCCC(=O)O	0.608363	0.751513	1774.46
5-(3-(2-(2-Methoxyphenyl)acetyl)-1H-indol-1-yl)pentanoic acid	COC1=CC=CC=C1CC(=O)C2=CN(C3=CC=CC=C32)CCCCC(=O)O	0.452595	0.975682	1927.87
Amidepsine J	CC1=CC(=CC(=C1C(=O)N[C@@H](C)C(=O)O)O)OC(=O)C2=C(C=C(C=C2C)OC(=O)C3=C(C=C(C=C3C)OC)OC)O	0.21894	0.4303	2614.74
Fluticasone propionate	CCC(=O)O[C@@]1([C@@H](C[C@@H]2[C@@]1(C[C@@H]([C@]3([C@H]2C[C@@H](C4=CC(=O)C=C[C@@]43C)F)F)O)C)C)C(=O)SCF	0.575586	0.789352	2195.86
Dimyristoyl phosphatidic acid	CCCCCCCCCCCCCC(=O)OC[C@H](COP(=O)(O)O)OC(=O)CCCCCCCCCCCCC	0.048175	0.445388	3063.83
Torin 2	C1=CC(=CC(=C1)N2C(=O)C=CC3=CN=C4C=CC(=CC4=C32)C5=CN=C(C=C5)N)C(F)(F)F	0.389214	0.869027	2293.68
(5E)-5-[(3As,4R,5R,6aR)-5-hydroxy-4-[(E,4S)-4-methyl-3-oxooct-1-en-6-ynyl]-3,3a,4,5,6,6a-hexahydro-1H-pentalen-2-ylidene]pentanoic acid	CC#CC[C@H](C)C(=O)/C=C/[C@H]1[C@@H](C[C@@H]2[C@@H]1C/C(=C/CCCC(=O)O)/C2)O	0.299869	0.921306	1795.51
1-[2-(4-Chlorophenyl)sulfanylacetyl]-N-[2-[2-(dimethylamino)ethyldisulfanyl]ethyl]piperidine-4-carboxamide	CN(C)CCSSCCNC(=O)C1CCN(CC1)C(=O)CSC2=CC=C(C=C2)Cl	0.298771	0.807226	1764.1
Bimatoprost(Lumigan)	CCNC(=O)CCC/C=C/C[C@H]1[C@H](C[C@H]([C@@H]1/C=C/[C@H](CCC2=CC=CC=C2)O)O)O	0.311844	0.757305	2174.71
3'-Carbamoyl-[1,1'-biphenyl]-3-yl cyclohexylcarbamate	C1CCC(CC1)NC(=O)OC2=CC=CC(=C2)C3=CC(=CC=C3)C(=O)N	0.887566	0.921306	1660.96
Prednisolone phosphate	C[C@]12C[C@@H]([C@H]3[C@H]([C@@H]1CC[C@@]2(C(=O)COP(=O)(O)O)O)CCC4=CC(=O)C=C[C@]34C)O	0.483999	0.554701	1988
TGR5 Receptor Agonist	CC1=C(C(=NO1)C2=CC=CC=C2Cl)C(=O)N(C)C3=CC=C(C=C3)Cl	0.641471	0.994583	1423.67
N-[2-[[(3S)-2-Oxoazepan-3-yl]carbamoyl]phenyl]-1-benzothiophene-2-carboxamide	C1CCNC(=O)[C@H](C1)NC(=O)C2=CC=CC=C2NC(=O)C3=CC4=CC=CC=C4S3	0.618066	0.811136	2017.99
MS-Ppoh	CS(=O)(=O)NC(=O)CCCCCC1=CC=CC=C1OCC#C	0.556161	0.976499	1455.96
[1-(5-Hydroxypentyl)-1H-indazole-3-yl](1-naphthyl) ketone	C1=CC=C2C(=C1)C=CC=C2C(=O)C3=NN(C4=CC=CC=C43)CCCCCO	0.38845	0.976499	2079.73
3-[(4-Chlorophenyl)methoxy]-N-[(1S)-1-phenylethyl]thiophene-2-carboxamide	C[C@@H](C1=CC=CC=C1)NC(=O)C2=C(C=CS2)OCC3=CC=C(C=C3)Cl	0.62336	0.950875	1598.11
Nafcillin	CCOC1=C(C2=CC=CC=C2C=C1)C(=O)N[C@H]3[C@@H]4N(C3=O)[C@H](C(S4)(C)C)C(=O)O	0.730105	0.849852	1884.11
Thieno[3,2-d]pyrimidin-4(3H)-one, 6-(4-chlorophenyl)-3-[3-methoxy-4-[2-(1-pyrrolidinyl)ethoxy]phenyl]-	COC1=C(C=CC(=C1)N2C=NC3=C(C2=O)SC(=C3)C4=CC=C(C=C4)Cl)OCCN5CCCC5	0.360556	0.819111	2373.68
Phenyl 10-methylacridin-10-ium-9-carboxylate	C[N+]1=C2C=CC=CC2=C(C3=CC=CC=C31)C(=O)OC4=CC=CC=C4	0.241877	0.977288	1704.73
Sofosbuvir	C[C@@H](C(=O)OC(C)C)N[P@](=O)(OC[C@@H]1[C@H]([C@@]([C@@H](O1)N2C=CC(=O)NC2=O)(C)F)O)OC3=CC=CC=C3	0.305283	0.483753	2399.8
2-[(6s)-4-(4-Chlorophenyl)-2,3,9-Trimethyl-6h-Thieno[3,2-F][1,2,4]triazolo[4,3-A][1,4]diazepin-6-Yl]-N-(4-{[({2-[(3s)-2,6-Dioxopiperidin-3-Yl]-1,3-Dioxo-2,3-Dihydro-1h-Isoindol-4-Yl}oxy)acetyl]amino}butyl)acetamide	CC1=C(SC2=C1C(=N[C@H](C3=NN=C(N32)C)CC(=O)NCCCCNC(=O)COC4=CC=CC5=C4C(=O)N(C5=O)[C@H]6CCC(=O)NC6=O)C7=CC=C(C=C7)Cl)C	0.141978	0.465419	3943.17
2-[(9S)-7-(4-Chlorophenyl)-4,5,13-trimethyl-3-thia-1,8,11,12-tetrazatricyclo[8.3.0.02,6]trideca-2(6),4,7,10,12-pentaen-9-yl]-N-[4-[[2-[2-[(3R)-2,6-dioxopiperidin-3-yl]-1,3-dioxoisoindol-4-yl]oxyacetyl]amino]butyl]acetamide	CC1=C(SC2=C1C(=N[C@H](C3=NN=C(N32)C)CC(=O)NCCCCNC(=O)COC4=CC=CC5=C4C(=O)N(C5=O)[C@@H]6CCC(=O)NC6=O)C7=CC=C(C=C7)Cl)C	0.141978	0.465419	3943.17
8-Epi pgf1alpha	CCCCC[C@@H](/C=C/[C@H]1[C@@H](C[C@@H]([C@H]1CCCCCCC(=O)O)O)O)O	0.299854	0.820098	1719.96
Idelalisib	CC[C@@H](C1=NC2=C(C(=CC=C2)F)C(=O)N1C3=CC=CC=C3)NC4=NC=NC5=C4NC=N5	0.453318	0.837946	2279.01
(3S)-N-Methyl-3-phenyl-3-[4-(trifluoromethyl)phenoxy]propan-1-amine	CNCC[C@@H](C1=CC=CC=C1)OC2=CC=C(C=C2)C(F)(F)F	0.851796	0.905438	1284.84
1872382-47-2 (Free base)	CCN(CC)CCCC[C@@H](C(=O)N[C@@H](CO)C(=O)OC)NC(=O)[C@H](CC(C)C)NC(=O)[C@H](C)NC(=O)[C@H](CC1=CC=CC=C1)NC(=O)C2=CC=C(C=C2)C(C)(C)C	0.072467	0.402646	4279.94
4-[4-[4-[4-Fluoro-3-(trifluoromethyl)phenyl]-1-methylimidazol-2-yl]piperidin-1-yl]-1H-pyrazolo[3,4-d]pyrimidine	CN1C=C(N=C1C2CCN(CC2)C3=NC=NC4=C3C=NN4)C5=CC(=C(C=C5)F)C(F)(F)F	0.476298	0.849088	2096.22
Atorvastatin	CC(C)C1=C(C(=C(N1CC[C@H](C[C@H](CC(=O)O)O)O)C2=CC=C(C=C2)F)C3=CC=CC=C3)C(=O)NC4=CC=CC=C4	0.16276	0.465927	2962.32
Linoelaidic acid	CCCCC/C=C/C/C=C/CCCCCCCC(=O)O	0.318262	0.909938	1424.53
(S)-5-(4-Benzyloxy-phenyl)-4-(7-phenyl-heptanoylamino)-pentanoic acid	C1=CC=C(C=C1)CCCCCCC(=O)N[C@@H](CCC(=O)O)CC2=CC=C(C=C2)OCC3=CC=CC=C3	0.230874	0.622425	2665.51
N-((2S,3S)-1-Amino-3-methyl-1-oxopentan-2-yl)-1-(5-fluoropentyl)-1H-indazole-3-carboxamide	CC[C@H](C)[C@@H](C(=O)N)NC(=O)C1=NN(C2=CC=CC=C21)CCCCCF	0.636916	0.92114	1795.41
(S)-Ranolazine	CC1=C(C(=CC=C1)C)NC(=O)CN2CCN(CC2)C[C@@H](COC3=CC=CC=C3OC)O	0.639855	0.827436	2113.36
CYP3cide	CC1=CC=C(C=C1)C2=C(C=NN2C)C3=NN(C4=C3C(=NC=N4)N5CC[C@@H](C5)N6CCCCC6)C	0.465309	0.854725	2626.94
RCS-4 3-Methoxy isomer	CCCCCN1C=C(C2=CC=CC=C21)C(=O)C3=CC(=CC=C3)OC	0.449146	0.981162	1797.95
[(3S,8R,9S,10R,13R,14S,17R)-10,13-Dimethyl-17-[(2R)-6-methylheptan-2-yl]-2,3,4,7,8,9,11,12,14,15,16,17-dodecahydro-1H-cyclopenta[a]phenanthren-3-yl] hydrogen sulfate	C[C@H](CCCC(C)C)[C@H]1CC[C@@H]2[C@@]1(CC[C@H]3[C@@H]2CC=C4[C@@]3(CC[C@@H](C4)OS(=O)(=O)O)C)C	0.317753	0.634784	2619.61
Retinyl acetate	CC1=C(C(CCC1)(C)C)/C=C/C(=C/C=C/C(=C/COC(=O)C)/C)/C	0.435998	0.869665	1724.05
Cholesterol sulfate	C[C@H](CCCC(C)C)[C@H]1CC[C@@H]2[C@@]1(CC[C@H]3[C@H]2CC=C4[C@@]3(CC[C@@H](C4)OS(=O)(=O)O)C)C	0.317753	0.634784	2619.61
Dextromethorphan	CN1CC[C@@]23CCCC[C@@H]2[C@@H]1CC4=C3C=C(C=C4)OC	0.776132	0.877551	1473.61
7-[(1R,2R,3R,5S)-3,5-Dihydroxy-2-[(E,3R)-3-hydroxyoct-1-enyl]cyclopentyl]heptanoic acid	CCCCC[C@H](/C=C/[C@H]1[C@@H](C[C@@H]([C@@H]1CCCCCCC(=O)O)O)O)O	0.299854	0.820098	1719.96
(2R)-2-[[4-[4-(2,4-Dimethoxy-6-methylbenzoyl)oxy-2-hydroxy-6-methylbenzoyl]oxy-2-hydroxy-6-methylbenzoyl]amino]propanoic acid	CC1=CC(=CC(=C1C(=O)N[C@H](C)C(=O)O)O)OC(=O)C2=C(C=C(C=C2C)OC(=O)C3=C(C=C(C=C3C)OC)OC)O	0.21894	0.4303	2614.74
(5E)-5-[(3As,4R,5R,6aS)-5-hydroxy-4-[(E,4S)-4-methyl-3-oxooct-1-en-6-ynyl]-3,3a,4,5,6,6a-hexahydro-1H-pentalen-2-ylidene]pentanoic acid	CC#CC[C@H](C)C(=O)/C=C/[C@H]1[C@@H](C[C@H]2[C@@H]1C/C(=C/CCCC(=O)O)/C2)O	0.299869	0.921306	1795.51
Apicidin	CC[C@H](C)[C@H]1C(=O)N2CCCC[C@@H]2C(=O)N[C@H](C(=O)N[C@H](C(=O)N1)CC3=CN(C4=CC=CC=C43)OC)CCCCCC(=O)CC	0.31088	0.518094	3472.88
9-[(1S)-1-Anilinoethyl]-7-methyl-2-morpholin-4-ylpyrido[1,2-a]pyrimidin-4-one	CC1=CN2C(=O)C=C(N=C2C(=C1)[C@H](C)NC3=CC=CC=C3)N4CCOCC4	0.77117	0.97595	1966.73
((1R,2R,5R)-2-(2,6-Dimethoxy-4-(2-methyloctan-2-yl)phenyl)-7,7-dimethyl-4-bicyclo(3.1.1)hept-3-enyl) methanol	CCCCCCC(C)(C)C1=CC(=C(C(=C1)OC)[C@H]2C=C([C@H]3C[C@@H]2C3(C)C)CO)OC	0.344827	0.761182	2257.38
SR9243	CC1=CC(=C(C(=C1)C)S(=O)(=O)N(CCC2=CC(=CC=C2)Br)CC3=CC=C(C=C3)C4=CC(=CC=C4)S(=O)(=O)C)C	0.203235	0.634271	3058.69
5-[3-[[(2S)-1-Amino-3,3-dimethyl-1-oxobutan-2-yl]carbamoyl]indol-1-yl]pentanoic acid	CC(C)(C)[C@@H](C(=O)N)NC(=O)C1=CN(C2=CC=CC=C21)CCCCC(=O)O	0.616818	0.803564	1822.13
N-(6-{4-[({4-[(4-Methylpiperazin-1-yl)methyl]-3-(trifluoromethyl)phenyl}carbamoyl)methyl]phenoxy}pyrimidin-4-yl)cyclopropanecarboxamide	CN1CCN(CC1)CC2=C(C=C(C=C2)NC(=O)CC3=CC=C(C=C3)OC4=NC=NC(=C4)NC(=O)C5CC5)C(F)(F)F	0.39041	0.711615	2735.63
Lapatinib	CS(=O)(=O)CCNCC1=CC=C(O1)C2=CC3=C(C=C2)N=CN=C3NC4=CC(=C(C=C4)OCC5=CC(=CC=C5)F)Cl	0.179479	0.598467	2930.24
N-(Benzenesulfonyl)-2-[4-(4,9-diethoxy-3-oxo-1H-benzo[f]isoindol-2-yl)phenyl]acetamide	CCOC1=C2CN(C(=O)C2=C(C3=CC=CC=C31)OCC)C4=CC=C(C=C4)CC(=O)NS(=O)(=O)C5=CC=CC=C5	0.323444	0.762856	2911.75
Walrycin B	CN1C2=NC(=O)N(C(=O)C2=NC(=N1)C3=CC=C(C=C3)C(F)(F)F)C	0.663038	1	1381.03
N,N-Dicyclohexyl-5-cyclopropyl-3-isoxazolecarboxamide	C1CCC(CC1)N(C2CCCCC2)C(=O)C3=NOC(=C3)C4CC4	0.811322	1	1524.66
Tadalafil	CN1CC(=O)N2[C@@H](C1=O)CC3=C([C@H]2C4=CC5=C(C=C4)OCO5)NC6=CC=CC=C36	0.692559	0.953859	2043.29
Etoricoxib	CC1=NC=C(C=C1)C2=C(C=C(C=N2)Cl)C3=CC=C(C=C3)S(=O)(=O)C	0.704404	1	1623.58
JWH 307 3'-isomer	CCCCCN1C=C(C(=C1)C(=O)C2=CC=CC3=CC=CC=C32)C4=CC=CC=C4F	0.251284	0.751048	2216.09
(1R,5Z)-5-[(4-Chlorophenyl)methylidene]-2,2-dimethyl-1-(1,2,4-triazol-1-ylmethyl)cyclopentan-1-ol	CC1(CC/C(=C/C2=CC=C(C=C2)Cl)/[C@]1(CN3C=NC=N3)O)C	0.941251	0.976499	1432.46
PTP CD45 Inhibitor	CC(C)(C)C(=O)NC1=CC2=C(C=C1)C3=CC=CC=C3C(=O)C2=O	0.816724	0.976499	1466.18
(5R)-5-[(E,3S)-3-Hydroxy-4-phenylbut-1-enyl]-1-[6-(2H-tetrazol-5-yl)hexyl]pyrrolidin-2-one	C1CC(=O)N([C@H]1/C=C/[C@H](CC2=CC=CC=C2)O)CCCCCCC3=NNN=N3	0.459032	0.903786	1965.39
Mibefradil	CC(C)[C@H]1C2=C(CC[C@@]1(CCN(C)CCCC3=NC4=CC=CC=C4N3)OC(=O)COC)C=C(C=C2)F	0.367183	0.784828	2757.14
(1R,2R)-2-[[4'-[[(Phenylamino)carbonyl]amino][1,1'-biphenyl]-4-YL]carbonyl]cyclopentanecarboxylic acid	C1C[C@H]([C@@H](C1)C(=O)O)C(=O)C2=CC=C(C=C2)C3=CC=C(C=C3)NC(=O)NC4=CC=CC=C4	0.440162	0.72444	2179.2
(4R)-6-Amino-1,3-dimethyl-4-[4-(trifluoromethyl)phenyl]-4H-pyrano[2,3-c]pyrazole-5-carbonitrile	CC1=NN(C2=C1[C@H](C(=C(O2)N)C#N)C3=CC=C(C=C3)C(F)(F)F)C	0.869692	0.976499	1341.59
Alfuzosin, (S)-	CN(CCCNC(=O)[C@@H]1CCCO1)C2=NC3=CC(=C(C=C3C(=N2)N)OC)OC	0.650937	0.85208	1842.55
Axitinib	CNC(=O)C1=CC=CC=C1SC2=CC3=C(C=C2)C(=NN3)/C=C/C4=CC=CC=N4	0.524191	0.902747	2006.56
(2S)-2-[[4-[3-[[(1R)-1-(4-Chloro-3-methylphenyl)ethyl]amino]phenyl]-2,6-dimethylbenzoyl]amino]propanoic acid	CC1=CC(=CC(=C1C(=O)N[C@@H](C)C(=O)O)C)C2=CC(=CC=C2)N[C@H](C)C3=CC(=C(C=C3)Cl)C	0.382607	0.593183	2309.43
1906919-67-2 (S-Isomer)	CCN([C@H]1CN(N=C1C2=CC(=C(C=C2)Cl)Cl)C(=NC3=CC(=CC=C3)OC(F)F)NC#N)C(=O)CO	0.247421	0.67276	2016.23
[(6S,8S,9R,10S,11S,13S,14S,16R,17S)-6,9-Difluoro-17-(fluoromethylsulfanylcarbonyl)-11-hydroxy-10,13,16-trimethyl-3-oxo-6,7,8,11,12,14,15,16-octahydrocyclopenta[a]phenanthren-17-yl] propanoate	CCC(=O)O[C@]1([C@@H](C[C@@H]2[C@@]1(C[C@@H]([C@]3([C@H]2C[C@@H](C4=CC(=O)C=C[C@@]43C)F)F)O)C)C)C(=O)SCF	0.575586	0.789352	2195.86
Cepharanthine	CN1CCC2=CC3=C(C4=C2[C@@H]1CC5=CC=C(C=C5)OC6=C(C=CC(=C6)C[C@@H]7C8=CC(=C(C=C8CCN7C)OC)O4)OC)OCO3	0.245028	0.634598	3447.8
[(8As)-7-[4-(dimethylamino)benzoyl]-1,3-dioxo-5,6,8,8a-tetrahydroimidazo[1,5-a]pyrazin-2-yl] 4-[2-(4-chlorophenyl)ethyl]piperidine-1-carboxylate	CN(C)C1=CC=C(C=C1)C(=O)N2CCN3[C@@H](C2)C(=O)N(C3=O)OC(=O)N4CCC(CC4)CCC5=CC=C(C=C5)Cl	0.491718	0.798966	2698.21
(R)-Nadifloxacin	C[C@@H]1CCC2=C3N1C=C(C(=O)C3=CC(=C2N4CCC(CC4)O)F)C(=O)O	0.858762	0.921302	1760.35
3-Acetyl-11-keto-beta-boswellic acid	C[C@@H]1CC[C@@]2(CC[C@@]3(C(=CC(=O)[C@H]4[C@]3(CC[C@@H]5[C@@]4(CC[C@H]([C@]5(C)C(=O)O)OC(=O)C)C)C)[C@@H]2[C@H]1C)C)C	0.409781	0.621182	2907.72
Levonadifloxacin	C[C@H]1CCC2=C3N1C=C(C(=O)C3=CC(=C2N4CCC(CC4)O)F)C(=O)O	0.858762	0.921302	1760.35
Coti-2	C1CC2=C(/C(=N/NC(=S)N3CCN(CC3)C4=CC=CC=N4)/C1)N=CC=C2	0.649675	0.975331	1731.68
Salirasib	CC(=CCC/C(=C/CC/C(=C/CSC1=CC=CC=C1C(=O)O)/C)/C)C	0.365074	0.807824	1750.15
SIRT2 Inhibitor, Inactive Control, AGK7	C1=CC2=C(C(=C1)NC(=O)/C(=C/C3=CC=C(O3)C4=C(C=CC(=C4)Cl)Cl)/C#N)N=CC=C2	0.300026	0.750139	1951.39
Benzamide, N-[3-[1,4-dihydro-1-methyl-7-[(6-methyl-3-pyridinyl)amino]-2-oxopyrimido[4,5-D]pyrimidin-3(2H)-YL]-4-methylphenyl]-3-(trifluoromethyl)-	CC1=C(C=C(C=C1)NC(=O)C2=CC(=CC=C2)C(F)(F)F)N3CC4=CN=C(N=C4N(C3=O)C)NC5=CN=C(C=C5)C	0.314008	0.615642	2672.68
(4-Hydroxynaphthalen-1-yl)-(1-pentylindol-3-yl)methanone	CCCCCN1C=C(C2=CC=CC=C21)C(=O)C3=CC=C(C4=CC=CC=C43)O	0.343601	0.907332	2129.84
6-(4-Fluorophenyl)-2-oxo-N-(4-phenylbutyl)-3(2H)-benzoxazolecarboxamide	C1=CC=C(C=C1)CCCCNC(=O)N2C3=C(C=C(C=C3)C4=CC=C(C=C4)F)OC2=O	0.461062	0.928519	2172.6
(R)-Fluoxetine	CNCC[C@H](C1=CC=CC=C1)OC2=CC=C(C=C2)C(F)(F)F	0.851796	0.905438	1284.84
JWH 309 5'-isomer	CCCCCN1C=CC(=C1C2=CC=CC3=CC=CC=C32)C(=O)C4=CC=CC5=CC=CC=C54	0.194903	0.662785	2673.55
Fub-npb-22	C1=CC=C2C(=C1)C(=NN2CC3=CC=C(C=C3)F)C(=O)OC4=CC=CC5=C4N=CC=C5	0.316637	0.964671	2166.61
Sacubitrilat	C[C@H](C[C@@H](CC1=CC=C(C=C1)C2=CC=CC=C2)NC(=O)CCC(=O)O)C(=O)O	0.583621	0.830427	1803.69
[1-[(2S)-Butan-2-yl]indol-3-yl]-naphthalen-1-ylmethanone	CC[C@H](C)N1C=C(C2=CC=CC=C21)C(=O)C3=CC=CC4=CC=CC=C43	0.421525	0.855126	1994.76
Pemetrexed	C1=CC(=CC=C1CCC2=CNC3=C2C(=O)NC(=N3)N)C(=O)N[C@@H](CCC(=O)O)C(=O)O	0.286744	0.509278	2038.9
4-Fluoro-2-(4-{[(3s,4r)-4-(1-Hydroxy-1-Methylethyl)pyrrolidin-3-Yl]amino}-6,7-Dimethoxyquinazolin-2-Yl)phenol	CC(C)([C@@H]1CNC[C@H]1NC2=NC(=NC3=CC(=C(C=C32)OC)OC)C4=C(C=CC(=C4)F)O)O	0.461537	0.669276	2164.44
1-[Fluoro(methoxy)phosphoryl]icosane	CCCCCCCCCCCCCCCCCCCC[P@@](=O)(OC)F	0.156134	0.748966	1930.88
Aliskiren	CC(C)[C@@H](CC1=CC(=C(C=C1)OC)OCCCOC)C[C@@H]([C@H](C[C@@H](C(C)C)C(=O)NCC(C)(C)C(=O)N)O)N	0.192994	0.463021	2831.97
(4S)-1-Benzyl-4-(4-bromophenyl)-5-(3-imidazol-1-ylpropyl)-3-phenyl-4H-pyrrolo[3,4-c]pyrazol-6-one	C1=CC=C(C=C1)CN2C3=C([C@@H](N(C3=O)CCCN4C=CN=C4)C5=CC=C(C=C5)Br)C(=N2)C6=CC=CC=C6	0.230704	0.699346	2768.88
3-[(Naphthalen-1-yl)methyl]-1-pentyl-1H-indole	CCCCCN1C=C(C2=CC=CC=C21)CC3=CC=CC4=CC=CC=C43	0.352651	0.700802	2094.19
(1R,4S,7S,9S,10S,13R,15S)-15-Hydroxy-7-[(2S,3R,4R,5R,6R)-6-(hydroxymethyl)-3-(3-methylbutanoyloxy)-4,5-disulfooxyoxan-2-yl]oxy-9-methyl-14-methylidenetetracyclo[11.2.1.01,10.04,9]hexadecane-5,5-dicarboxylic acid	CC(C)CC(=O)O[C@@H]1[C@H]([C@@H]([C@H](O[C@@H]1O[C@H]2C[C@]3([C@@H]4CC[C@@H]5C[C@@]4(CC[C@@H]3C(C2)(C(=O)O)C(=O)O)[C@H](C5=C)O)C)CO)OS(=O)(=O)O)OS(=O)(=O)O	0.0532795	0.402222	3515.66
N-[(2S)-4-Methyl-1-[[(2S)-4-methyl-1-oxo-1-[[(2S)-1-oxopentan-2-yl]amino]pentan-2-yl]amino]-1-oxopentan-2-yl]carbamic acid (phenylmethyl) ester	CCC[C@@H](C=O)NC(=O)[C@H](CC(C)C)NC(=O)[C@H](CC(C)C)NC(=O)OCC1=CC=CC=C1	0.367818	0.659386	2241.33
10-[(1S,2S)-2-Hexylcyclopropyl]decanoic acid	CCCCCC[C@H]1C[C@@H]1CCCCCCCCCC(=O)O	0.365829	0.873394	1564.6
Naphthalen-1-yl(1-propyl-1H-indol-3-yl)methanone	CCCN1C=C(C2=CC=CC=C21)C(=O)C3=CC=CC4=CC=CC=C43	0.460063	0.915301	1894.04
Unii-V14CN8M621	C[C@@H](C(=O)OC(C)C)N[P@@](=O)(OC[C@@H]1[C@H]([C@@]([C@@H](O1)N2C=CC(=O)NC2=O)(C)F)O)OC3=CC=CC=C3	0.305283	0.483753	2399.8
[4-[4-[3-(Hydroxymethyl)phenyl]phenyl]triazol-1-yl]-[(2R)-2-phenylpiperidin-1-yl]methanone	C1CCN([C@H](C1)C2=CC=CC=C2)C(=O)N3C=C(N=N3)C4=CC=C(C=C4)C5=CC=CC(=C5)CO	0.469352	0.852641	2426.92
Ilimaquinone	C[C@H]1CC[C@]2([C@H]([C@]1(C)CC3=C(C(=O)C=C(C3=O)OC)O)CCCC2=C)C	0.588094	0.976499	1816.62
Rimonabant	CC1=C(N(N=C1C(=O)NN2CCCCC2)C3=C(C=C(C=C3)Cl)Cl)C4=CC=C(C=C4)Cl	0.52084	0.750032	1907.29
N-(4'-Cyano[1,1'-biphenyl]-4-yl)-N'-[4-(3H-imidazo[4,5-b]pyridin-7-yl)phenyl] Urea	C1=CC(=CC=C1C#N)C2=CC=C(C=C2)NC(=O)NC3=CC=C(C=C3)C4=C5C(=NC=C4)N=CN5	0.334494	0.681577	2338.72
2-(4-Cyanobutyl)-N-(2-phenylpropan-2-yl)-2H-indazole-3-carboxamide	CC(C)(C1=CC=CC=C1)NC(=O)C2=C3C=CC=CC3=NN2CCCCC#N	0.635077	0.976493	1943.02
(S)-Paliperidone	CC1=C(C(=O)N2CCC[C@@H](C2=N1)O)CCN3CCC(CC3)C4=NOC5=C4C=CC(=C5)F	0.690289	0.88473	2273.37
Mometasone furoate	C[C@@H]1C[C@H]2[C@@H]3CCC4=CC(=O)C=C[C@@]4([C@]3([C@H](C[C@@]2([C@]1(C(=O)CCl)OC(=O)C5=CC=CO5)C)O)Cl)C	0.449102	0.780251	2396.67
(E)-7-[(1R,2R,3S,5R)-2-[(E,3R)-4-(3-Chlorophenoxy)-3-hydroxybut-1-enyl]-3,5-dihydroxycyclopentyl]hept-5-enoic acid	C1[C@H]([C@@H]([C@H]([C@H]1O)/C=C/[C@H](COC2=CC(=CC=C2)Cl)O)C/C=C/CCCC(=O)O)O	0.32078	0.708069	1861.33
Pulmicort	CCC[C@@H]1O[C@@H]2C[C@H]3[C@@H]4CCC5=CC(=O)C=C[C@@]5([C@H]4[C@H](C[C@@]3([C@@]2(O1)C(=O)CO)C)O)C	0.712453	0.820472	2209.71
LY-411575	C[C@@H](C(=O)N[C@H]1C2=CC=CC=C2C3=CC=CC=C3N(C1=O)C)NC(=O)[C@H](C4=CC(=CC(=C4)F)F)O	0.52409	0.684157	2298.94
JWH 018 2-hydroxyindole metabolite	CCCCCN1C2=CC=CC=C2C(=C1O)C(=O)C3=CC=CC4=CC=CC=C43	0.343601	0.907332	2121.59
(E)-7-[(1R,2R,3R,5S)-3,5-Dihydroxy-2-[(3S)-3-hydroxy-5-phenylpentyl]cyclopentyl]hept-5-enoic acid	C1[C@H]([C@@H]([C@H]([C@H]1O)C/C=C/CCCC(=O)O)CC[C@@H](CCC2=CC=CC=C2)O)O	0.324178	0.795828	1954.93
8-Quinolyl 1-pentylindazole-3-carboxylate	CCCCCN1C2=CC=CC=C2C(=N1)C(=O)OC3=CC=CC4=C3N=CC=C4	0.27628	1	2026.18
Flavin mononucleotide	CC1=CC2=C(C=C1C)N(C3=NC(=O)NC(=O)C3=N2)C[C@@H]([C@@H]([C@@H](COP(=O)(O)O)O)O)O	0.17602	0.457401	2017.34
(+)-Pentazocine	C[C@@H]1[C@@H]2CC3=C([C@]1(CCN2CC=C(C)C)C)C=C(C=C3)O	0.833526	0.918633	1528.13
2-((2'-(5-Ethyl-3,4-diphenyl-1H-pyrazol-1-yl)-[1,1'-biphenyl]-3-yl)oxy)acetic acid	CCC1=C(C(=NN1C2=CC=CC=C2C3=CC(=CC=C3)OCC(=O)O)C4=CC=CC=C4)C5=CC=CC=C5	0.265684	0.641766	2703.33
2-((5-Bromo-2-((3,4,5-trimethoxyphenyl)amino)pyrimidin-4-yl)oxy)-N-methylbenzamide	CNC(=O)C1=CC=CC=C1OC2=NC(=NC=C2Br)NC3=CC(=C(C(=C3)OC)OC)OC	0.48645	0.720741	1856.14
(2R)-N-[3-[(2-Hydroxynaphthalen-1-yl)methylideneamino]phenyl]-2-phenylpropanamide	C[C@H](C1=CC=CC=C1)C(=O)NC2=CC(=CC=C2)N=CC3=C(C=CC4=CC=CC=C43)O	0.405533	0.807549	2224.71
Clarithromycin	CC[C@@H]1[C@@]([C@@H]([C@H](C(=O)[C@@H](C[C@@]([C@@H]([C@H]([C@@H]([C@H](C(=O)O1)C)O[C@H]2C[C@@]([C@H]([C@@H](O2)C)O)(C)OC)C)O[C@H]3[C@@H]([C@H](C[C@H](O3)C)N(C)C)O)(C)OC)C)C)O)(C)O	0.265829	0.42872	3829.76
Roxadustat	CC1=C2C=C(C=CC2=C(C(=N1)C(=O)NCC(=O)O)O)OC3=CC=CC=C3	0.651421	0.829446	1614.88
Benzeneacetamide, N-(((4-(5,9-diethoxy-6,8-dihydro-6-oxo-7H-pyrrolo(3,4-g)quinolin-7-yl)-3-methylphenyl)methyl)sulfonyl)-2-methoxy-	CCOC1=C2CN(C(=O)C2=C(C3=C1N=CC=C3)OCC)C4=C(C=C(C=C4)CS(=O)(=O)NC(=O)CC5=CC=CC=C5OC)C	0.261771	0.68126	3258
(S)-Tenatoprazole	CC1=CN=C(C(=C1OC)C)C[S@](=O)C2=NC3=C(N2)C=CC(=N3)OC	0.762232	0.976499	1573.06
N'-(1-Hexyl-2-oxoindolin-3-ylidene)benzohydrazide	CCCCCCN1C2=CC=CC=C2C(=C1O)N=NC(=O)C3=CC=CC=C3	0.429174	0.915706	1864.51
Tipifarnib	CN1C=NC=C1[C@@](C2=CC=C(C=C2)Cl)(C3=CC4=C(C=C3)N(C(=O)C=C4C5=CC(=CC=C5)Cl)C)N	0.362889	0.772856	2540.57
25N-Nbome	COC1=CC=CC=C1CNCCC2=CC(=C(C=C2OC)[N+](=O)[O-])OC	0.426937	0.976499	1566.24
Benzenesulfonamide, 4-iodo-N-(4-methoxy-3-(4-methyl-1-piperazinyl)phenyl)-	CN1CCN(CC1)C2=C(C=CC(=C2)NS(=O)(=O)C3=CC=C(C=C3)I)OC	0.657968	0.797517	1721.3
Kazusamycin A	CC/C(=C/[C@H](C)C/C=C/C(=C/[C@@H](CO)C(=O)[C@@H](C)[C@@H]([C@@H](C)C/C(=C/C(=O)O)/C)O)/C)/C=C/[C@H]1[C@H](C=CC(=O)O1)C	0.125584	0.532757	2956.63
JWH 031 2'-isomer	CCCCCCN1C=CC=C1C(=O)C2=CC=CC3=CC=CC=C32	0.419873	0.913925	1773.29
BB-Cl-Amidine	C1=CC=C(C=C1)C2=CC=C(C=C2)C(=O)N[C@@H](CCCN=C(CCl)N)C3=NC4=CC=CC=C4N3	0.140853	0.71006	2405.97
Biotin HPDP	C1[C@H]2[C@@H]([C@@H](S1)CCCCC(=O)NCCCCCCNC(=O)CCSSC3=CC=CC=N3)NC(=O)N2	0.135567	0.581334	2373.58
(4-Methyl-1-naphthyl)-(1-pentylindol-3-yl)methanone	CCCCCN1C=C(C2=CC=CC=C21)C(=O)C3=CC=C(C4=CC=CC=C43)C	0.284784	0.796	2205.46
(5E)-5-[(3As,4R,5S,6aR)-5-hydroxy-4-[(E,4R)-4-methyl-3-oxooct-1-en-6-ynyl]-3,3a,4,5,6,6a-hexahydro-1H-pentalen-2-ylidene]pentanoic acid	CC#CC[C@@H](C)C(=O)/C=C/[C@H]1[C@H](C[C@@H]2[C@@H]1C/C(=C/CCCC(=O)O)/C2)O	0.299869	0.921306	1795.51
Vorinostat	C1=CC=C(C=C1)NC(=O)CCCCCCC(=O)NO	0.38322	0.86493	1123.97
5-(Methylamino)-2-(1-naphthalenyl)-4-oxazolecarbonitrile	CNC1=C(N=C(O1)C2=CC=CC3=CC=CC=C32)C#N	0.755585	0.976499	1234.06
3-Amino-6-{4-[(4-Methylpiperazin-1-Yl)sulfonyl]phenyl}-N-Pyridin-3-Ylpyrazine-2-Carboxamide	CN1CCN(CC1)S(=O)(=O)C2=CC=C(C=C2)C3=CN=C(C(=N3)C(=O)NC4=CN=CC=C4)N	0.59047	0.647514	2178.33
(E)-7-[(1R,2R,3R,5R)-2-[(E,3R)-4-(3-Chlorophenoxy)-3-hydroxybut-1-enyl]-3,5-dihydroxycyclopentyl]hept-5-enoic acid	C1[C@H]([C@@H]([C@H]([C@@H]1O)/C=C/[C@H](COC2=CC(=CC=C2)Cl)O)C/C=C/CCCC(=O)O)O	0.32078	0.708069	1861.33
Lomitapide	C1CN(CCC1NC(=O)C2=CC=CC=C2C3=CC=C(C=C3)C(F)(F)F)CCCCC4(C5=CC=CC=C5C6=CC=CC=C64)C(=O)NCC(F)(F)F	0.129689	0.521963	3536.39
(4As,6aS,6aR,6bR,8aR,10R,11S,12aR,14bS)-10,11-dihydroxy-2,2,6a,6b,9,9,12a-heptamethyl-1,3,4,5,6,6a,7,8,8a,10,11,12,13,14b-tetradecahydropicene-4a-carboxylic acid	C[C@@]12CC[C@@H]3[C@@]([C@@H]1CC=C4[C@@]2(CC[C@@]5([C@H]4CC(CC5)(C)C)C(=O)O)C)(C[C@@H]([C@@H](C3(C)C)O)O)C	0.396846	0.596026	2684.3
2-[[(1R)-4-[5-(3,4-Diethoxyphenyl)-1,2,4-oxadiazol-3-yl]-2,3-dihydro-1H-inden-1-yl]amino]ethanol	CCOC1=C(C=C(C=C1)C2=NC(=NO2)C3=C4CC[C@H](C4=CC=C3)NCCO)OCC	0.555941	0.863643	2094.2
3-(3-(Cyclopentylthio)-5-(((2-methyl-4'-(methylsulfonyl)-[1,1'-biphenyl]-4-yl)oxy)methyl)-4h-1,2,4-triazol-4-yl)pyridine	CC1=C(C=CC(=C1)OCC2=NN=C(N2C3=CN=CC=C3)SC4CCCC4)C5=CC=C(C=C5)S(=O)(=O)C	0.296433	0.766938	2693.89
(R)-Tenatoprazole	CC1=CN=C(C(=C1OC)C)C[S@@](=O)C2=NC3=C(N2)C=CC(=N3)OC	0.762232	0.976499	1573.06
CyPPA	CC1=CC(=NC(=N1)N2C(=CC(=N2)C)C)NC3CCCCC3	0.939466	0.976499	1432.72
4-[(1S,3S)-2,2,3-Trimethylcyclopentyl]butanoic acid	C[C@H]1CC[C@@H](C1(C)C)CCCC(=O)O	0.752075	0.974685	878.175
(6Ar,10aR)-3-[6-(1H-Imidazol-1-yl)-2-methylhexan-2-yl]-6,6,9-trimethyl-6a,7,10,10a-tetrahydro-6H-dibenzo[b,d]pyran-1-ol	CC1=CC[C@@H]2[C@@H](C1)C3=C(C=C(C=C3OC2(C)C)C(C)(C)CCCCN4C=CN=C4)O	0.447515	0.801246	2310.3
5-Iodo-7-beta-D-ribofuranosyl-7H-pyrrolo[2,3-d]pyrimidin-4-amine	C1=C(C2=C(N=CN=C2N1[C@@H]3[C@@H]([C@@H]([C@H](O3)CO)O)O)N)I	0.494695	0.695146	1108.21
5-(5,6-Dimethoxy-1H-benzimidazol-1-yl)-3-[[4-(methylsulfonyl)phenyl]methoxy]-2-thiophenecarboxamide	COC1=C(C=C2C(=C1)N=CN2C3=CC(=C(S3)C(=O)N)OCC4=CC=C(C=C4)S(=O)(=O)C)OC	0.404862	0.707628	2282.63
(5E)-5-[(3As,4R,5S,6aR)-5-hydroxy-4-[(E,4S)-4-methyl-3-oxooct-1-en-6-ynyl]-3,3a,4,5,6,6a-hexahydro-1H-pentalen-2-ylidene]pentanoic acid	CC#CC[C@H](C)C(=O)/C=C/[C@H]1[C@H](C[C@@H]2[C@@H]1C/C(=C/CCCC(=O)O)/C2)O	0.299869	0.921306	1795.51
JWH 398 8-chloronaphthyl isomer	CCCCCN1C=C(C2=CC=CC=C21)C(=O)C3=CC=CC4=C3C(=CC=C4)Cl	0.266004	0.761363	2105.1
N-(3-Methoxyphenyl)-4-chlorocinnamanilide	COC1=CC=CC(=C1)NC(=O)/C=C/C2=CC=C(C=C2)Cl	0.863279	0.975803	1196.9
Fura F	C1=CC(=C(C(=C1N(CC(=O)O)CC(=O)O)OCCOC2=C(C=C3C(=C2)C=C(O3)C4=NC=C(O4)C(=O)O)N(CC(=O)O)CC(=O)O)F)F	0.101727	0.408788	2754.31
Omeprazole sulfone	CC1=CN=C(C(=C1OC)C)CS(=O)(=O)C2=NC3=C(N2)C=C(C=C3)OC	0.750482	0.97452	1753.07
(R)-6-(4-((4-Ethylpiperazin-1-yl)methyl)phenyl)-N-(1-phenylethyl)-7H-pyrrolo[2,3-d]pyrimidin-4-amine	CCN1CCN(CC1)CC2=CC=C(C=C2)C3=CC4=C(N3)N=CN=C4N[C@H](C)C5=CC=CC=C5	0.426456	0.802445	2544.36
1421373-98-9	CN(C)CCN(C)C1=CC(=C(C=C1NC(=O)C=C)NC2=NC=CC(=N2)C3=CNC4=CC=CC=C43)OC	0.284578	0.679591	2666.7
Sgx-523	CN1C=C(C=N1)C2=NN3C(=NN=C3SC4=CC5=C(C=C4)N=CC=C5)C=C2	0.492356	1	1846.5
Methylprednisolone	C[C@H]1C[C@H]2[C@@H]3CC[C@@]([C@]3(C[C@@H]([C@@H]2[C@@]4(C1=CC(=O)C=C4)C)O)C)(C(=O)CO)O	0.685143	0.856617	1879.73
N-[4-(2-Tert-Butylphenylsulfonyl)phenyl]-2,3,4-trihydroxy-5-(2-isopropylbenzyl)benzamide	CC(C)C1=CC=CC=C1CC2=CC(=C(C(=C2O)O)O)C(=O)NC3=CC=C(C=C3)S(=O)(=O)C4=CC=CC=C4C(C)(C)C	0.178362	0.365804	3095.93
N-[(2R)-1-Amino-3,3-dimethyl-1-oxobutan-2-yl]-1-(5-hydroxypentyl)indole-3-carboxamide	CC(C)(C)[C@H](C(=O)N)NC(=O)C1=CN(C2=CC=CC=C21)CCCCCO	0.631505	0.859017	1820.08
[1-[(3R)-3-Chloropentyl]indol-3-yl]-naphthalen-1-ylmethanone	CC[C@H](CCN1C=C(C2=CC=CC=C21)C(=O)C3=CC=CC4=CC=CC=C43)Cl	0.280777	0.79813	2105.1
Mirabegron	C1=CC=C(C=C1)[C@H](CNCCC2=CC=C(C=C2)NC(=O)CC3=CSC(=N3)N)O	0.416864	0.781873	1862.99
(22S)-Budesonide	CCC[C@H]1O[C@@H]2C[C@H]3[C@@H]4CCC5=CC(=O)C=C[C@@]5([C@H]4[C@H](C[C@@]3([C@@]2(O1)C(=O)CO)C)O)C	0.712453	0.820472	2209.71
Pentanoic acid, 3-[[(1,1-dimethylethoxy)carbonyl]amino]-5-fluoro-4-oxo-, methyl ester	CC(C)(C)OC(=O)N[C@@H](CC(=O)OC)C(=O)CF	0.747646	0.976499	833.071
Kibdelone C	CCCC1=C(C2=C(C3=C(C4=C(CC3)C(=C5C(=C4O)C(=O)C6=C(O5)[C@H](C[C@@H]([C@@H]6O)O)O)OC)C(=C2C(=O)N1C)O)O)Cl	0.195413	0.404056	2968.01
Foretinib	COC1=CC2=C(C=CN=C2C=C1OCCCN3CCOCC3)OC4=C(C=C(C=C4)NC(=O)C5(CC5)C(=O)NC6=CC=C(C=C6)F)F	0.14964	0.625353	3224.73
(1H-Indol-3-yl)(2,2,3,3-tetramethylcyclopropyl)methanone	CC1(C(C1(C)C)C(=O)C2=CNC3=CC=CC=C32)C	0.790929	0.964152	1253.98
1-[Fluoro(methoxy)phosphoryl]icosane	CCCCCCCCCCCCCCCCCCCC[P@](=O)(OC)F	0.156134	0.748966	1930.88
1-((4-Methylsulfonyl)phenyl)-3-trifluoromethyl-5-(4-fluorophenyl)pyrazole	CS(=O)(=O)C1=CC=C(C=C1)N2C(=CC(=N2)C(F)(F)F)C3=CC=C(C=C3)F	0.639142	0.984185	1558.98
Safinamide	C[C@@H](C(=O)N)NCC1=CC=C(C=C1)OCC2=CC(=CC=C2)F	0.825046	0.921306	1339.01
JWH 200 2'-naphthyl isomer	C1COCCN1CCN2C=C(C3=CC=CC=C32)C(=O)C4=CC5=CC=CC=C5C=C4	0.479717	0.976528	2269.64
2-Cyano-3-[5-(2,5-dichlorophenyl)-2-furanyl]-N-5-quinolinyl-2-propenamide	C1=CC2=C(C=CC=N2)C(=C1)NC(=O)/C(=C/C3=CC=C(O3)C4=C(C=CC(=C4)Cl)Cl)/C#N	0.300026	0.750139	1959.64
Halofuginone	C1C[C@@H]([C@H](NC1)CC(=O)CN2C=NC3=CC(=C(C=C3C2=O)Cl)Br)O	0.797977	0.853325	1536.77
Cobimetinib	C1CCN[C@@H](C1)C2(CN(C2)C(=O)C3=C(C(=C(C=C3)F)F)NC4=C(C=C(C=C4)I)F)O	0.526223	0.668325	1823.01
1-Hexyl-3-[4-[[4-[2-[[(2S)-2-hydroxy-3-(4-hydroxyphenoxy)propyl]amino]ethyl]phenyl]sulfamoyl]phenyl]urea	CCCCCCNC(=O)NC1=CC=C(C=C1)S(=O)(=O)NC2=CC=C(C=C2)CCNC[C@@H](COC3=CC=C(C=C3)O)O	0.128283	0.431281	3013.94
5-Iodotubercidin	C1=C(C2=C(N=CN=C2N1[C@H]3[C@@H]([C@@H]([C@H](O3)CO)O)O)N)I	0.494695	0.695146	1108.21
N-Octyl-1-(4-chlorobenzoyl)-2-methyl-5-methoxy-1H-indole-3-acetamide	CCCCCCCCNC(=O)CC1=C(N(C2=C1C=C(C=C2)OC)C(=O)C3=CC=C(C=C3)Cl)C	0.334799	0.698629	2449.98
Unii-C3R6fcd00G	CN1CCCC[C@H](C1)N2C=C(C3=CC=CC=C32)C(=O)C4=CC=CC5=CC=CC=C54	0.42584	0.897202	2367.82
Piperine	C1CCN(CC1)C(=O)/C=C/C=C/C2=CC3=C(C=C2)OCO3	0.632788	0.999622	1334.14
(E)-7-[(1R,2R,3S,5S)-2-[(E,3R)-4-(3-Chlorophenoxy)-3-hydroxybut-1-enyl]-3,5-dihydroxycyclopentyl]hept-5-enoic acid	C1[C@@H]([C@@H]([C@H]([C@H]1O)/C=C/[C@H](COC2=CC(=CC=C2)Cl)O)C/C=C/CCCC(=O)O)O	0.32078	0.708069	1861.33
N-(2-Aminoethyl)-N-[(3-methoxy-4-phenylmethoxyphenyl)methyl]thiophene-2-carboxamide	COC1=C(C=CC(=C1)CN(CCN)C(=O)C2=CC=CS2)OCC3=CC=CC=C3	0.595048	0.942694	1895.41
2-(4-(Benzo[d][1,3]dioxol-5-yl)-2-tert-butyl-1H-imidazol-5-yl)-6-methylpyridine	CC1=NC(=CC=C1)C2=C(N=C(N2)C(C)(C)C)C3=CC4=C(C=C3)OCO4	0.750263	0.976499	1712.19
Glycochenodeoxycholic acid	C[C@H](CCC(=O)NCC(=O)O)[C@H]1CC[C@@H]2[C@@]1(CC[C@H]3[C@H]2[C@@H](C[C@H]4[C@@]3(CC[C@H](C4)O)C)O)C	0.495706	0.66338	2397.59
Derquantel	C[C@]1(CCN2[C@]13C[C@@H]4[C@](C2)(C[C@]5(C4(C)C)CNC6=C5C=CC7=C6OC=CC(O7)(C)C)N(C3=O)C)O	0.595121	0.748717	2595
1-Pentyl-1H-indole-3-carboxylic acid 7-isoquinolinyl ester	CCCCCN1C=C(C2=CC=CC=C21)C(=O)OC3=CC4=C(C=C3)C=CN=C4	0.255965	0.967164	2082.47
[1-[(3S)-3-Chloropentyl]indol-3-yl]-naphthalen-1-ylmethanone	CC[C@@H](CCN1C=C(C2=CC=CC=C21)C(=O)C3=CC=CC4=CC=CC=C43)Cl	0.280777	0.79813	2105.1
Gedunin	CC(=O)O[C@@H]1C[C@@H]2[C@](C=CC(=O)C2(C)C)([C@@H]3[C@@]1([C@]45[C@H](O4)C(=O)O[C@H]([C@@]5(CC3)C)C6=COC=C6)C)C	0.450351	0.821676	2510.79
Methanone, (2-iodo-5-nitrophenyl)(1-(((2R)-1-methyl-2-piperidinyl)methyl)-1H-indol-3-yl)-	CN1CCCC[C@@H]1CN2C=C(C3=CC=CC=C32)C(=O)C4=C(C=CC(=C4)[N+](=O)[O-])I	0.215786	0.811527	2059.58
Grapiprant	CCC1=NC2=C(N1C3=CC=C(C=C3)CCNC(=O)NS(=O)(=O)C4=CC=C(C=C4)C)C=C(N=C2C)C	0.404201	0.712889	2659.68
N-[4-[[6-Methoxy-7-[3-(4-morpholinyl)propoxy]-4-quinazolinyl]amino]phenyl]benzamide	COC1=C(C=C2C(=C1)C(=NC=N2)NC3=CC=C(C=C3)NC(=O)C4=CC=CC=C4)OCCCN5CCOCC5	0.293751	0.722142	2718.37
Clinafloxacin, (S)-	C1CN(C[C@H]1N)C2=C(C=C3C(=C2Cl)N(C=C(C3=O)C(=O)O)C4CC4)F	0.871298	0.920376	1617.9
[4-[4-[3-(Hydroxymethyl)phenyl]phenyl]triazol-1-yl]-[(2S)-2-phenylpiperidin-1-yl]methanone	C1CCN([C@@H](C1)C2=CC=CC=C2)C(=O)N3C=C(N=N3)C4=CC=C(C=C4)C5=CC=CC(=C5)CO	0.469352	0.852641	2426.92
2-Isopropylphenyl (2-(naphthalen-2-yl)ethyl)carbamate	CC(C)C1=CC=CC=C1OC(=O)NCCC2=CC3=CC=CC=C3C=C2	0.688345	0.967327	1831.8
(Z)-1-(3-((3-((1H-Pyrrol-2-yl)methylene)-2-oxoindolin-6-yl)amino)-4-methylphenyl)-3-(2-fluoro-5-(trifluoromethyl)phenyl)urea	CC1=C(C=C(C=C1)NC(=O)NC2=C(C=CC(=C2)C(F)(F)F)F)NC3=CC4=C(C=C3)/C(=C/C5=CC=CN5)/C(=O)N4	0.13642	0.4168	2589.14
Hydrocinnamate-(orn-Pro-dcha-Trp-Arg)	C1CCC(CC1)C[C@@H]2C(=O)N[C@H](C(=O)N[C@H](C(=O)NCCC[C@@H](C(=O)N3CCC[C@H]3C(=O)N2)NC(=O)CCC4=CC=CC=C4)CCCN=C(N)N)CC5=CNC6=CC=CC=C65	0.0761992	0.400067	4879.77
JWH 073 N-(1,1-dimethylethyl) isomer	CC(C)(C)N1C=C(C2=CC=CC=C21)C(=O)C3=CC=CC4=CC=CC=C43	0.427685	0.88088	1951.21
Bioymifi	C1=CC(=CC=C1N2C(=O)/C(=C/C3=CC=C(O3)C4=CC5=C(C=C4)C(=O)NC5=O)/SC2=N)Br	0.407807	0.718447	1898.85
Benzyl N-[(2S)-1-[[(3R)-1,2-dioxo-1-(pyridin-2-ylmethylamino)hexan-3-yl]amino]-4-methyl-1-oxopentan-2-yl]carbamate	CCC[C@H](C(=O)C(=O)NCC1=CC=CC=N1)NC(=O)[C@H](CC(C)C)NC(=O)OCC2=CC=CC=C2	0.376973	0.585192	2374.47
Vilazodone	C1CN(CCN1CCCCC2=CNC3=C2C=C(C=C3)C#N)C4=CC5=C(C=C4)OC(=C5)C(=O)N	0.421693	0.784647	2524.2
N-((1S)-1-(Aminocarbonyl)-2-methylpropyl)-1-(5-fluoropentyl)-1H-indole-3-carboxamide	CC(C)[C@@H](C(=O)N)NC(=O)C1=CN(C2=CC=CC=C21)CCCCCF	0.684134	0.921306	1726.16
(4S)-N-(2,5-Dichlorophenyl)-4-(furan-2-yl)-2-methyl-5-oxo-4,6,7,8-tetrahydro-1H-quinoline-3-carboxamide	CC1=C([C@H](C2=C(N1)CCCC2=O)C3=CC=CO3)C(=O)NC4=C(C=CC(=C4)Cl)Cl	0.720987	0.844393	1769.39
Ent-Atorvastatin	CC(C)C1=C(C(=C(N1CC[C@@H](C[C@@H](CC(=O)O)O)O)C2=CC=C(C=C2)F)C3=CC=CC=C3)C(=O)NC4=CC=CC=C4	0.16276	0.465927	2962.32
(2R,3R)-4-Amino-3-[[1-(cyclohexylmethyl)indazole-3-carbonyl]amino]-2-methyl-4-oxobutanoic acid	C[C@H]([C@H](C(=O)N)NC(=O)C1=NN(C2=CC=CC=C21)CC3CCCCC3)C(=O)O	0.669794	0.738701	1894.95
1-(3-Chloro-4-methylphenyl)-3-[2,6-dinitro-4-(trifluoromethyl)anilino]thiourea	CC1=C(C=C(C=C1)NC(=S)NNC2=C(C=C(C=C2[N+](=O)[O-])C(F)(F)F)[N+](=O)[O-])Cl	0.337847	0.641932	1378.55
(S)-4-(1-(5-Chloro-2-(4-fluorophenoxy)benzamido)ethyl)benzoic acid	C[C@@H](C1=CC=C(C=C1)C(=O)O)NC(=O)C2=C(C=CC(=C2)Cl)OC3=CC=C(C=C3)F	0.562209	0.834909	1763.11
3-(2,4-Dichloro-5-methoxyphenyl)-2-sulfanyl-4(3H)-quinazolinone	COC1=C(C=C(C(=C1)N2C(=O)C3=CC=CC=C3NC2=S)Cl)Cl	0.696478	0.976499	1434.17
2-[4-[[(2R)-2-Aminobutyl]amino]pyrimidin-2-yl]-4-(1-methyl-1H-pyrazol-4-yl)phenol dihydrochloride	CC[C@H](CNC1=NC(=NC=C1)C2=C(C=CC(=C2)C3=CN(N=C3)C)O)N	0.637748	0.849848	1701.42
7-Sulfocholic acid	C[C@H](CCC(=O)O)[C@H]1CC[C@@H]2[C@@]1([C@H](C[C@H]3[C@H]2[C@@H](C[C@H]4[C@@]3(CC[C@H](C4)O)C)OS(=O)(=O)O)O)C	0.417479	0.493343	2423.69
Mdmb-chminaca	CC(C)(C)[C@@H](C(=O)OC)NC(=O)C1=NN(C2=CC=CC=C21)CC3CCCCC3	0.791554	0.959218	1988.53
4-[2-[2-Hydroxyethyl(Phenyl)amino]-2-Oxidanylidene-Ethyl]-~{n}-Oxidanyl-Benzamide	C1=CC=C(C=C1)N(CCO)C(=O)CC2=CC=C(C=C2)C(=O)NO	0.554798	0.86493	1358.49
2-[1-(4,4-Difluorocyclohexyl)-piperidin-4-yl]-6-fluoro-3-oxo-2,3-dihydro-1H-isoindole-4-carboxamide	C1CC(CCC1N2CCC(CC2)N3CC4=C(C3=O)C(=CC(=C4)F)C(=O)N)(F)F	0.855884	0.944509	1724.21
1-N-[(2S)-2,3-Dihydroxypropyl]-3-N-[(2R)-2,3-dihydroxypropyl]-2,4,6-triiodo-5-[(2-methoxyacetyl)amino]-3-N-methylbenzene-1,3-dicarboxamide	CN(C[C@H](CO)O)C(=O)C1=C(C(=C(C(=C1I)C(=O)NC[C@@H](CO)O)I)NC(=O)COC)I	0.164792	0.408651	1685.93
[5-(2-Methylphenyl)-1-pentyl-1H-pyrrol-3-yl]-1-naphthalenyl-Methanone	CCCCCN1C=C(C=C1C2=CC=CC=C2C)C(=O)C3=CC=CC4=CC=CC=C43	0.248512	0.746009	2338.18
[1-[(2R)-Butan-2-yl]indol-3-yl]-naphthalen-1-ylmethanone	CC[C@@H](C)N1C=C(C2=CC=CC=C21)C(=O)C3=CC=CC4=CC=CC=C43	0.421525	0.855126	1994.76
Moxifloxacin	COC1=C2C(=CC(=C1N3C[C@@H]4CCCN[C@@H]4C3)F)C(=O)C(=CN2C5CC5)C(=O)O	0.818518	0.87887	2036.71
Methanone, (1-pentyl-1H-indol-3-yl)(4-propyl-1-naphthalenyl)-	CCCCCN1C=C(C2=CC=CC=C21)C(=O)C3=CC=C(C4=CC=CC=C43)CCC	0.233443	0.73765	2414.42
2-(Cyclobutylamino)-N-[(2s)-3-(3,4-Dihydroisoquinolin-2(1h)-Yl)-2-Hydroxypropyl]pyridine-4-Carboxamide	C1CC(C1)NC2=NC=CC(=C2)C(=O)NC[C@@H](CN3CCC4=CC=CC=C4C3)O	0.68644	0.8536	1986.75
4-[[(2S)-2-(4-Amino-3,5-dichlorophenyl)-2-hydroxyethyl]amino]cyclohexan-1-ol	C1CC(CCC1NC[C@H](C2=CC(=C(C(=C2)Cl)N)Cl)O)O	0.643145	0.827067	1125.31
Rel-(E)-7-((1R,2R,3R,5S)-2-((R,E)-4-(3-Chlorophenoxy)-3-hydroxybut-1-en-1-yl)-3,5-dihydroxycyclopentyl)hept-5-enoic acid	C1[C@@H]([C@@H]([C@H]([C@@H]1O)/C=C/[C@H](COC2=CC(=CC=C2)Cl)O)C/C=C/CCCC(=O)O)O	0.32078	0.708069	1861.33
(1S,2S,3R,4R)-3-[5-Chloro-2-((S)-1-methoxy-7-morpholin-4-yl-6,7,8,9-tetrahydro-5H-benzocyclohepten-2-ylamino)-pyrimidin-4-ylamino]-bicyclo[2.2.1]hept-5-ene-2-carboxylic acid amide	COC1=C(C=CC2=C1CC[C@H](CC2)N3CCOCC3)NC4=NC=C(C(=N4)N[C@@H]5[C@@H]6C[C@H]([C@@H]5C(=O)N)C=C6)Cl	0.362044	0.610035	2730.97
(E)-N-(2-(((3-(4-Chlorophenyl)allyl)(methyl)amino)methyl)phenyl)-4-methoxybenzenesulfonamide	CN(C/C=C/C1=CC=C(C=C1)Cl)CC2=CC=CC=C2NS(=O)(=O)C3=CC=C(C=C3)OC	0.474642	0.82215	2215.75
4-(4-Fluoro-3-(4-methoxypiperidine-1-carbonyl)benzyl)phthalazin-1(2H)-one	COC1CCN(CC1)C(=O)C2=C(C=CC(=C2)CC3=NNC(=O)C4=CC=CC=C43)F	0.737132	0.944494	2051.77
3-[4-(2,3-Dimethylphenyl)piperazine-1-carbonyl]-N,N-dimethyl-4-pyrrolidin-1-ylbenzenesulfonamide	CC1=C(C(=CC=C1)N2CCN(CC2)C(=O)C3=C(C=CC(=C3)S(=O)(=O)N(C)C)N4CCCC4)C	0.671962	0.836532	2453.79
Dacomitinib	COC1=C(C=C2C(=C1)N=CN=C2NC3=CC(=C(C=C3)F)Cl)NC(=O)/C=C/CN4CCCCC4	0.465445	0.756228	2210.17
BS-181	CC(C)C1=C2N=C(C=C(N2N=C1)NCC3=CC=CC=C3)NCCCCCCN	0.429792	0.853548	2107.36
Testosterone	C[C@]12CC[C@H]3[C@H]([C@@H]1CC[C@@H]2O)CCC4=CC(=O)CC[C@]34C	0.73423	0.974685	1552.68
1-(4-((4-Ethylpiperazin-1-yl)methyl)-3-(trifluoromethyl)phenyl)-3-(4-((6-(methylamino)pyrimidin-4-yl)oxy)phenyl)urea	CCN1CCN(CC1)CC2=C(C=C(C=C2)NC(=O)NC3=CC=C(C=C3)OC4=NC=NC(=C4)NC)C(F)(F)F	0.373344	0.665003	2479.77
US8680132, MI-77302 (TFA salt)	CC(C)(C)C[C@H]1[C@]2([C@H]([C@@H](N1)C(=O)NC3CCC(CC3)O)C4=C(C(=CC=C4)Cl)F)C5=C(C=C(C=C5)Cl)NC2=O	0.407247	0.618771	2604.91
2-Pyrrolidinone, 5-((1E,3R)-4,4-difluoro-3-hydroxy-4-phenyl-1-butenyl)-1-(6-(1H-tetrazol-5-yl)hexyl)-, (5R)-	C1CC(=O)N([C@H]1/C=C/[C@H](C(C2=CC=CC=C2)(F)F)O)CCCCCCC3=NNN=N3	0.431291	0.840913	1975.89
JWH 073 5-hydroxyindole metabolite	CCCCN1C=C(C2=C1C=CC(=C2)O)C(=O)C3=CC=CC4=CC=CC=C43	0.484038	0.950182	2018.48
N-[2-[2-[2-(2-Aminoethoxy)ethoxy]ethoxy]ethyl]-2-[4-[(2,6-diaminopyrimidin-4-yl)methyl]-2,6-dimethoxyphenoxy]acetamide	COC1=CC(=CC(=C1OCC(=O)NCCOCCOCCOCCN)OC)CC2=CC(=NC(=N2)N)N	0.193609	0.437319	2263.13
4-Nitrophenyl 4-[bis(2H-1,3-benzodioxol-5-yl)(hydroxy)methyl]piperidine-1-carboxylate	C1CN(CCC1C(C2=CC3=C(C=C2)OCO3)(C4=CC5=C(C=C4)OCO5)O)C(=O)OC6=CC=C(C=C6)[N+](=O)[O-]	0.388542	0.664933	2375.66
4-HydroxyphenylRCS-4	CCCCCN1C=C(C2=CC=CC=C21)C(=O)C3=CC=C(C=C3)O	0.526366	0.976499	1673.68
10-[(1R,2R)-2-Hexylcyclopropyl]decanoic acid	CCCCCC[C@@H]1C[C@H]1CCCCCCCCCC(=O)O	0.365829	0.873394	1564.6
(5S)-4-[Hydroxy-(3-methyl-4-phenylmethoxyphenyl)methylidene]-1-(3-morpholin-4-ylpropyl)-5-pyridin-4-ylpyrrolidine-2,3-dione	CC1=C(C=CC(=C1)C(=C2[C@@H](N(C(=O)C2=O)CCCN3CCOCC3)C4=CC=NC=C4)O)OCC5=CC=CC=C5	0.254354	0.780001	2782.2
21R-Argatroban	C[C@@H]1CCN([C@H](C1)C(=O)O)C(=O)[C@H](CCCN=C(N)N)NS(=O)(=O)C2=CC=CC3=C2NC[C@@H](C3)C	0.183565	0.420258	2488.27
N-[[3-[(2S)-2-Hydroxy-3-[[2-[4-[(phenylsulfonyl)amino]phenyl]ethyl]amino]propoxy]phenyl]methyl]-acetamide	CC(=O)NCC1=CC(=CC=C1)OC[C@H](CNCCC2=CC=C(C=C2)NS(=O)(=O)C3=CC=CC=C3)O	0.269937	0.575833	2531.72
Pyr3	CCOC(=O)C1=C(N(N=C1)C2=CC=C(C=C2)NC(=O)C(=C(Cl)Cl)Cl)C(F)(F)F	0.513427	0.83117	1363.78
2-(3-(2-Chloro-5-(trifluoromethoxy)phenyl)-3-azaspiro[5.5]undecan-9-yl)acetic acid	C1CC2(CCC1CC(=O)O)CCN(CC2)C3=C(C=CC(=C3)OC(F)(F)F)Cl	0.719152	0.903235	1556.79
13,14-Dehydro-15-cyclohexyl Carbaprostacyclin	C1CCC(CC1)(C#C[C@H]2[C@@H](C[C@H]3[C@@H]2C/C(=C/CCCC(=O)O)/C3)O)O	0.414674	0.86493	1709.71
[(1R)-2-[3-[(1-Benzoylpiperidin-4-yl)-methylcarbamoyl]naphthalen-2-yl]-1-naphthalen-1-yl-2-oxoethyl]phosphonic acid	CN(C1CCN(CC1)C(=O)C2=CC=CC=C2)C(=O)C3=CC4=CC=CC=C4C=C3C(=O)[C@@H](C5=CC=CC6=CC=CC=C65)P(=O)(O)O	0.159231	0.529526	3515.42
21S-Argatroban	C[C@@H]1CCN([C@H](C1)C(=O)O)C(=O)[C@H](CCCN=C(N)N)NS(=O)(=O)C2=CC=CC3=C2NC[C@H](C3)C	0.183565	0.420258	2488.27
(5E)-5-[(3As,4S,5S,6aS)-5-hydroxy-4-[2-(1-hydroxycyclohexyl)ethynyl]-3,3a,4,5,6,6a-hexahydro-1H-pentalen-2-ylidene]pentanoic acid	C1CCC(CC1)(C#C[C@H]2[C@H](C[C@H]3[C@@H]2C/C(=C/CCCC(=O)O)/C3)O)O	0.414674	0.86493	1709.71
(11S)-11-(6-Carboxyhexylamino)-3-chloro-6,11-dihydro-6-methyldibenzo[c,f][1,2]thiazepine 5,5-dioxide	CN1C2=CC=CC=C2[C@@H](C3=C(S1(=O)=O)C=C(C=C3)Cl)NCCCCCCC(=O)O	0.605589	0.80916	2038.97
1-Hexyl-3-(1-naphthoyl)pyrrole	CCCCCCN1C=CC(=C1)C(=O)C2=CC=CC3=CC=CC=C32	0.419873	0.913925	1773.29
Serotonin	C1=CC2=C(C=C1O)C(=CN2)CCN	0.646845	0.86493	844.759
Filgotinib	C1CC1C(=O)NC2=NN3C(=N2)C=CC=C3C4=CC=C(C=C4)CN5CCS(=O)(=O)CC5	0.671443	0.881805	2179
Ufiprazole	CC1=CN=C(C(=C1OC)C)CSC2=NC3=C(N2)C=C(C=C3)OC	0.719784	0.976499	1536.98
N-Cyclopropyl-8-[3-hydroxy-5-(2-methylheptan-2-yl)phenoxy]octanamide	CCCCCC(C)(C)C1=CC(=CC(=C1)OCCCCCCCC(=O)NC2CC2)O	0.340375	0.766669	2165.28
N-[2-[4-[[(5R)-2,4-Dioxo-1,3-thiazolidin-5-yl]methyl]phenoxy]ethyl]-5-[(3S)-dithiolan-3-yl]pentanamide	C1CSS[C@H]1CCCCC(=O)NCCOC2=CC=C(C=C2)C[C@@H]3C(=O)NC(=O)S3	0.388654	0.778954	1781.96
(4R)-N-(2,5-Dichlorophenyl)-4-(furan-2-yl)-2-methyl-5-oxo-4,6,7,8-tetrahydro-1H-quinoline-3-carboxamide	CC1=C([C@@H](C2=C(N1)CCCC2=O)C3=CC=CO3)C(=O)NC4=C(C=CC(=C4)Cl)Cl	0.720987	0.844393	1769.39
5-[(3Ar,4R,6aS)-2-oxo-1,3,3a,4,6,6a-hexahydrothieno[3,4-d]imidazol-4-yl]-N-[6-[4-[3-amino-4-hydroxy-3-(hydroxymethyl)butyl]phenoxy]hexyl]pentanamide	C1[C@@H]2[C@H]([C@H](S1)CCCCC(=O)NCCCCCCOC3=CC=C(C=C3)CCC(CO)(CO)N)NC(=O)N2	0.124402	0.43999	2606.2
Benzoic acid, 4-[2,3-dihydro-3-[[5-(4-nitrophenyl)-2-furanyl]methylene]-2-oxo-5-phenyl-1H-pyrrol-1-yl]-	C1=CC=C(C=C1)C2=C/C(=C/C3=CC=C(O3)C4=CC=C(C=C4)[N+](=O)[O-])/C(=O)N2C5=CC=C(C=C5)C(=O)O	0.205773	0.668997	2406.73
6,7-Dimethyl-3-[(methyl{2-[methyl({1-[3-(trifluoromethyl)phenyl]-1H-indol-3-YL}methyl)amino]ethyl}amino)methyl]-4H-chromen-4-one	CC1=CC2=C(C=C1C)OC=C(C2=O)CN(C)CCN(C)CC3=CN(C4=CC=CC=C43)C5=CC=CC(=C5)C(F)(F)F	0.211176	0.632186	3144.02
(S)-4-Bromo-N-(1-(1-(3-fluorophenyl)-4-oxo-1,3,8-triazaspiro[4.5]decan-8-yl)propan-2-yl)benzamide	C[C@@H](CN1CCC2(CC1)C(=O)NCN2C3=CC(=CC=C3)F)NC(=O)C4=CC=C(C=C4)Br	0.677887	0.740859	2010.73
S-Methoprene	C[C@@H](CCCC(C)(C)OC)C/C=C/C(=C/C(=O)OC(C)C)/C	0.321193	0.994683	1490.1
KU-60019	C[C@@H]1CN(C[C@@H](O1)C)CC(=O)NC2=CC3=C(C=C2)SC4=C(C3)C=CC=C4C5=CC(=O)C=C(O5)N6CCOCC6	0.397249	0.778001	2836.9
(11R)-11-(6-Carboxyhexylamino)-3-chloro-6,11-dihydro-6-methyldibenzo[c,f][1,2]thiazepine 5,5-dioxide	CN1C2=CC=CC=C2[C@H](C3=C(S1(=O)=O)C=C(C=C3)Cl)NCCCCCCC(=O)O	0.605589	0.80916	2038.97
Darunavir	CC(C)CN(C[C@H]([C@H](CC1=CC=CC=C1)NC(=O)O[C@H]2CO[C@@H]3[C@H]2CCO3)O)S(=O)(=O)C4=CC=C(C=C4)N	0.364423	0.515147	2721.41
Adx-47273	C1C[C@@H](CN(C1)C(=O)C2=CC=C(C=C2)F)C3=NC(=NO3)C4=CC=C(C=C4)F	0.699279	0.997575	1688.7
Rubiadin	CC1=C(C=C2C(=C1O)C(=O)C3=CC=CC=C3C2=O)O	0.644448	0.921306	1106.23
4-[[(2R)-2-(4-Amino-3,5-dichlorophenyl)-2-hydroxyethyl]amino]cyclohexan-1-ol	C1CC(CCC1NC[C@@H](C2=CC(=C(C(=C2)Cl)N)Cl)O)O	0.643145	0.827067	1125.31
Alfuzosin, (R)-	CN(CCCNC(=O)[C@H]1CCCO1)C2=NC3=CC(=C(C=C3C(=N2)N)OC)OC	0.650937	0.85208	1842.55
Ac-YVAD-AFC	C[C@@H](C(=O)N[C@@H](CC(=O)O)C(=O)NC1=CC2=C(C=C1)C(=CC(=O)O2)C(F)(F)F)NC(=O)[C@H](C(C)C)NC(=O)[C@H](CC3=CC=C(C=C3)O)NC(=O)C	0.119449	0.40044	3371.65
3-(4-{[5-Fluoro-2-(4-methylphenyl)phenyl]methoxy}phenyl)propanoic acid	CC1=CC=C(C=C1)C2=C(C=C(C=C2)F)COC3=CC=C(C=C3)CCC(=O)O	0.610698	0.960779	1794.57
N-[2-[4-[[(5S)-2,4-Dioxo-1,3-thiazolidin-5-yl]methyl]phenoxy]ethyl]-5-[(3S)-dithiolan-3-yl]pentanamide	C1CSS[C@H]1CCCCC(=O)NCCOC2=CC=C(C=C2)C[C@H]3C(=O)NC(=O)S3	0.388654	0.778954	1781.96
5-[(3Ar,4S,6aS)-2-oxo-1,3,3a,4,6,6a-hexahydrothieno[3,4-d]imidazol-4-yl]-N-[6-[4-[3-amino-4-hydroxy-3-(hydroxymethyl)butyl]phenoxy]hexyl]pentanamide	C1[C@@H]2[C@H]([C@@H](S1)CCCCC(=O)NCCCCCCOC3=CC=C(C=C3)CCC(CO)(CO)N)NC(=O)N2	0.124402	0.43999	2606.2
N-[2-[[4-[Bis(4-chlorophenyl)methyl]piperazin-1-yl]methyl]quinazolin-4-yl]-N/',N/'-dimethylpropane-1,3-diamine	CN(C)CCCNC1=NC(=NC2=CC=CC=C21)CN3CCN(CC3)C(C4=CC=C(C=C4)Cl)C5=CC=C(C=C5)Cl	0.231812	0.673619	2840.76
(S)-2-(2-(5-(5-Carbamimidoyl-1H-benzo(d)imidazol-2-yl)-2',6-dihydroxy-5'-sulfamoyl-(1,1'-biphenyl)-3-yl)acetamido)succinic acid	C1=CC2=C(C=C1C(=N)N)NC(=N2)C3=CC(=CC(=C3O)C4=C(C=CC(=C4)S(=O)(=O)N)O)CC(=O)N[C@@H](CC(=O)O)C(=O)O	0.0912071	0.400092	2866.48
[(2R)-1-Methoxy-3,3-dimethyl-1-oxobutan-2-yl] 1-(cyclohexylmethyl)indazole-3-carboxylate	CC(C)(C)[C@H](C(=O)OC)OC(=O)C1=NN(C2=CC=CC=C21)CC3CCCCC3	0.714154	0.981425	1952.65
2-[2-(4-Methoxypyridin-2-Yl)ethyl]-3h-Imidazo[4,5-B]pyridine	COC1=CC(=NC=C1)CCC2=NC3=C(N2)C=CC=N3	0.774447	0.976499	1267.73
2-[[(1R)-1-[7-Methyl-2-(4-morpholinyl)-4-oxo-4H-pyrido[1,2-a]pyrimidin-9-yl]ethyl]amino]benzoic acid	CC1=CN2C(=O)C=C(N=C2C(=C1)[C@@H](C)NC3=CC=CC=C3C(=O)O)N4CCOCC4	0.670036	0.861462	2122.55
(2'S,3R,4'S,5'R)-6-Chloro-4'-(3-chloro-2-fluorophenyl)-2'-(2,2-dimethylpropyl)-N-(trans-4-hydroxycyclohexyl)-2-oxo-1,2-dihydrospiro(indole-3,3'-pyrrolidine)-5'-carboxamide	CC(C)(C)C[C@H]1[C@@]2([C@H]([C@@H](N1)C(=O)NC3CCC(CC3)O)C4=C(C(=CC=C4)Cl)F)C5=C(C=C(C=C5)Cl)NC2=O	0.407247	0.618771	2604.91
Reserpine	CO[C@H]1[C@@H](C[C@@H]2CN3CCC4=C([C@H]3C[C@@H]2[C@@H]1C(=O)OC)NC5=C4C=CC(=C5)OC)OC(=O)C6=CC(=C(C(=C6)OC)OC)OC	0.373567	0.706803	3206.49
(22S)-22-Hydroxycholesterol	C[C@@H]([C@H]1CC[C@@H]2[C@@]1(CC[C@H]3[C@H]2CC=C4[C@@]3(CC[C@@H](C4)O)C)C)[C@H](CCC(C)C)O	0.525292	0.756007	2366.83
N-[2-[4-[[(5R)-2,4-Dioxo-1,3-thiazolidin-5-yl]methyl]phenoxy]ethyl]-5-[(3R)-dithiolan-3-yl]pentanamide	C1CSS[C@@H]1CCCCC(=O)NCCOC2=CC=C(C=C2)C[C@@H]3C(=O)NC(=O)S3	0.388654	0.778954	1781.96
5-(4-Fluorophenyl)-2-ureidothiophene-3-carboxamide	C1=CC(=CC=C1C2=CC(=C(S2)NC(=O)N)C(=O)N)F	0.80174	0.85758	985.538
Bufalin	C[C@]12CC[C@@H](C[C@H]1CC[C@@H]3[C@@H]2CC[C@]4([C@@]3(CC[C@@H]4C5=COC(=O)C=C5)O)C)O	0.7572	0.902678	2175.65
Fsllry-NH2	CC(C)C[C@@H](C(=O)N[C@@H](CCCN=C(N)N)C(=O)N[C@@H](CC1=CC=C(C=C1)O)C(=O)N)NC(=O)[C@H](CC(C)C)NC(=O)[C@H](CO)NC(=O)[C@H](CC2=CC=CC=C2)N	0.0331809	0.4	4112.35
2-(3-(4-((1H-Indazol-5-yl)amino)quinazolin-2-yl)phenoxy)-N-isopropylacetamide	CC(C)NC(=O)COC1=CC=CC(=C1)C2=NC3=CC=CC=C3C(=N2)NC4=CC5=C(C=C4)NN=C5	0.327006	0.702872	2557.45
Davercin	CC[C@@H]1[C@@]2([C@@H]([C@H](C(=O)[C@@H](C[C@@]([C@@H]([C@H]([C@@H]([C@H](C(=O)O1)C)O[C@H]3C[C@@]([C@H]([C@@H](O3)C)O)(C)OC)C)O[C@H]4[C@@H]([C@H](C[C@H](O4)C)N(C)C)O)(C)O)C)C)OC(=O)O2)C	0.321317	0.465796	3835.08
5-Carboxy-fluorescein diacetate N-succinimidyl ester	CC(=O)OC1=CC2=C(C=C1)C3(C4=C(C=C(C=C4)C(=O)ON5C(=O)CCC5=O)C(=O)O3)C6=C(O2)C=C(C=C6)OC(=O)C	0.263811	0.624836	2463.2
Bafetinib	CC1=C(C=C(C=C1)NC(=O)C2=CC(=C(C=C2)CN3CC[C@@H](C3)N(C)C)C(F)(F)F)NC4=NC=CC(=N4)C5=CN=CN=C5	0.28812	0.697637	2908.35
6-(Piperidin-4-yloxy)isoquinolin-1(2H)-one	C1CNCCC1OC2=CC3=C(C=C2)C(=O)NC=C3	0.844388	0.921306	1243.3
Mrt68921(hcl)	CN1CCC2=C(C1)C=CC(=C2)NC3=NC=C(C(=N3)NCCCNC(=O)C4CCC4)C5CC5	0.520939	0.757284	2362.55
Methyl nonadecanoate	CCCCCCCCCCCCCCCCCCC(=O)OC	0.217657	0.796977	1651.19
Benzyl N-[(2R)-1-[[(3R)-1,2-dioxo-1-(pyridin-2-ylmethylamino)hexan-3-yl]amino]-4-methyl-1-oxopentan-2-yl]carbamate	CCC[C@H](C(=O)C(=O)NCC1=CC=CC=N1)NC(=O)[C@@H](CC(C)C)NC(=O)OCC2=CC=CC=C2	0.376973	0.585192	2374.47
2-[(4-{2-[(4-Cyclohexylbutyl)(cyclohexylcarbamoyl)amino]ethyl}phenyl)sulfanyl]-2-methylpropanoic acid	CC(C)(C(=O)O)SC1=CC=C(C=C1)CCN(CCCCC2CCCCC2)C(=O)NC3CCCCC3	0.232696	0.547989	2581
N-[2-[4-[[(5S)-2,4-Dioxo-1,3-thiazolidin-5-yl]methyl]phenoxy]ethyl]-5-[(3R)-dithiolan-3-yl]pentanamide	C1CSS[C@@H]1CCCCC(=O)NCCOC2=CC=C(C=C2)C[C@H]3C(=O)NC(=O)S3	0.388654	0.778954	1781.96
Cddo-tfea, 4	C[C@@]12CC[C@]3(CCC(C[C@H]3[C@H]1C(=O)C=C4[C@]2(CC[C@@H]5[C@@]4(C=C(C(=O)C5(C)C)C#N)C)C)(C)C)C(=O)NCC(F)(F)F	0.390651	0.610748	2987.44
O-(Chloroacetylcarbamoyl)fumagillol	CC(=CC[C@@H]1[C@@](O1)(C)[C@H]2[C@@H]([C@@H](CC[C@]23CO3)OC(=O)NC(=O)CCl)OC)C	0.417661	0.933247	1649.25
5-Dimethylamiloride	CN(C)C1=NC(=C(N=C1Cl)C(=O)N=C(N)N)N	0.465437	0.725063	769.679
Gandotinib	CC1=CC(=NN1)NC2=NN3C(=C(N=C3C(=C2)CN4CCOCC4)C)CC5=C(C=C(C=C5)Cl)F	0.443384	0.758615	2299.26
[(1S)-2-[3-[(1-Benzoylpiperidin-4-yl)-methylcarbamoyl]naphthalen-2-yl]-1-naphthalen-1-yl-2-oxoethyl]phosphonic acid	CN(C1CCN(CC1)C(=O)C2=CC=CC=C2)C(=O)C3=CC4=CC=CC=C4C=C3C(=O)[C@H](C5=CC=CC6=CC=CC=C65)P(=O)(O)O	0.159231	0.529526	3515.42
(R)-(1-((1-Methylpiperidin-2-yl)methyl)-1H-indol-3-yl)(naphthalen-1-yl)methanone	CN1CCCC[C@@H]1CN2C=C(C3=CC=CC=C32)C(=O)C4=CC=CC5=CC=CC=C54	0.434922	0.914362	2367.82
5-(3-(1-Naphthoyl)-1H-indol-1-yl)pentan-2-one	CC(=O)CCCN1C=C(C2=CC=CC=C21)C(=O)C3=CC=CC4=CC=CC=C43	0.434739	0.984796	2101.93
Dovitinib	CN1CCN(CC1)C2=CC3=C(C=C2)N=C(N3)C4=C(C5=C(C=CC=C5F)NC4=O)N	0.487437	0.835932	2166.08
(2-Chloro-4-(4-(thiophen-2-yl)pyrimidin-2-ylamino)phenyl)(4-methylpiperazin-1-yl)methanone	CN1CCN(CC1)C(=O)C2=C(C=C(C=C2)NC3=NC=CC(=N3)C4=CC=CS4)Cl	0.700285	0.910027	1789.89
(S)-Suprofen	C[C@@H](C1=CC=C(C=C1)C(=O)C2=CC=CS2)C(=O)O	0.858961	0.976499	1030.65
Riociguat	CN(C1=C(N=C(N=C1N)C2=NN(C3=C2C=CC=N3)CC4=CC=CC=C4F)N)C(=O)OC	0.51135	0.693114	1975.39
Metergoline	CN1C[C@@H](C[C@H]2[C@H]1CC3=CN(C4=CC=CC2=C34)C)CNC(=O)OCC5=CC=CC=C5	0.714491	0.930228	2302.91
(s)-Salmeterol	C1=CC=C(C=C1)CCCCOCCCCCCNC[C@H](C2=CC(=C(C=C2)O)CO)O	0.31032	0.757305	2178.12
(4R)-1-Benzyl-4-(4-bromophenyl)-5-(3-imidazol-1-ylpropyl)-3-phenyl-4H-pyrrolo[3,4-c]pyrazol-6-one	C1=CC=C(C=C1)CN2C3=C([C@H](N(C3=O)CCCN4C=CN=C4)C5=CC=C(C=C5)Br)C(=N2)C6=CC=CC=C6	0.230704	0.699346	2768.88
(6R,1'R,2'S)-5,6,7,8 Tetrahydrobiopterin	C[C@H]([C@@H]([C@H]1CNC2=C(N1)C(=O)NC(=N2)N)O)O	0.362864	0.66304	957.694
2-[(2,2-Dimethyl-3,4-dihydrochromen-6-yl)sulfonyl-[(4-phenoxyphenyl)methyl]amino]acetic acid	CC1(CCC2=C(O1)C=CC(=C2)S(=O)(=O)N(CC3=CC=C(C=C3)OC4=CC=CC=C4)CC(=O)O)C	0.494033	0.801085	2410.35
6-(3-Oxidanylpropyl)-2-(1,3,6-Trimethyl-2-Oxidanylidene-Benzimidazol-5-Yl)benzo[de]isoquinoline-1,3-Dione	CC1=CC2=C(C=C1N3C(=O)C4=C5C(=C(C=C4)CCCO)C=CC=C5C3=O)N(C(=O)N2C)C	0.505544	0.8788	2432.85
3,4-Dihydro-9-hydroxy-[1]benzothieno[2,3-f]-1,4-thiazepin-5(2H)-one	C1CSC2=C(C(=O)N1)SC3=C2C=C(C=C3)O	0.755811	0.921306	913.069
4-{[(5,5,8,8-Tetramethyl-5,6,7,8-tetrahydronaphthalen-2-yl)carbonyl]amino}benzoic acid	CC1(CCC(C2=C1C=CC(=C2)C(=O)NC3=CC=C(C=C3)C(=O)O)(C)C)C	0.818824	0.921306	1760
(R)-Fexofenadine	CC(C)(C1=CC=C(C=C1)[C@@H](CCCN2CCC(CC2)C(C3=CC=CC=C3)(C4=CC=CC=C4)O)O)C(=O)O	0.341306	0.652812	2674.11
Isoquinolin-6-yl 1-pentyl-1H-indole-3-carboxylate	CCCCCN1C=C(C2=CC=CC=C21)C(=O)OC3=CC4=C(C=C3)C=NC=C4	0.255965	0.967164	2082.47
Agerafenib	CC(C)(C1=CC(=NO1)NC(=O)NC2=CC(=CC=C2)OC3=NC=NC4=CC(=C(C=C43)OC)OC)C(F)(F)F	0.310379	0.578503	2292.69
Sapropterin	C[C@@H]([C@@H]([C@H]1CNC2=C(N1)C(=O)NC(=N2)N)O)O	0.362864	0.66304	957.694
(R)-Bentamapimod	C1COCCN1CC2=CC=C(C=C2)COC3=NC=CC(=N3)[C@H](C#N)C4=NC5=CC=CC=C5S4	0.412078	0.853325	2264.14
N-(2-((1S,4R)-6-((4-(Cyclobutylamino)-5-(trifluoromethyl)pyrimidin-2-yl)amino)-1,2,3,4-tetrahydro-1,4-epiminonaphthalen-9-yl)-2-oxoethyl)acetamide	CC(=O)NCC(=O)N1[C@H]2CC[C@@H]1C3=C2C=CC(=C3)NC4=NC=C(C(=N4)NC5CCC5)C(F)(F)F	0.584198	0.688036	2185.57
(1-(4-(Naphthalen-2-yl)pyrimidin-2-yl)piperidin-4-yl)methanamine	C1CN(CCC1CN)C2=NC=CC(=N2)C3=CC4=CC=CC=C4C=C3	0.803177	0.976499	1760.09
Avagacestat	C1=CC(=CC=C1S(=O)(=O)N(CC2=C(C=C(C=C2)C3=NOC=N3)F)[C@H](CCC(F)(F)F)C(=O)N)Cl	0.427091	0.705762	1995.54
Amorfrutin B	CC(=CCC/C(=C/CC1=C(C=C(C(=C1O)C(=O)O)CCC2=CC=CC=C2)OC)/C)C	0.464864	0.772381	2121.44
Fura-2	CC1=CC(=C(C=C1)N(CC(=O)O)CC(=O)O)OCCOC2=C(C=C3C(=C2)C=C(O3)C4=NC=C(O4)C(=O)O)N(CC(=O)O)CC(=O)O	0.103815	0.408791	2847.04
Methyl 4-(6-(4-(methoxycarbonylamino)phenyl)-4-morpholino-1H-pyrazolo[3,4-d]pyrimidin-1-yl)piperidine-1-carboxylate	COC(=O)NC1=CC=C(C=C1)C2=NC3=C(C=NN3C4CCN(CC4)C(=O)OC)C(=N2)N5CCOCC5	0.58166	0.697555	2403.01
8-Ethenyl-1-hydroxy-10,12-dimethoxy-4-[(2S,3S,4S,5S,6R)-3,4,5-trihydroxy-4,6-dimethyloxan-2-yl]naphtho[1,2-c]isochromen-6-one	C[C@@H]1[C@@H]([C@]([C@H]([C@@H](O1)C2=C3C(=C(C=C2)O)C(=CC4=C3OC(=O)C5=C4C(=CC(=C5)C=C)OC)OC)O)(C)O)O	0.241262	0.489617	2724.19
Fexaramine	CN(C)C1=CC=C(C=C1)C2=CC=C(C=C2)CN(C3=CC=CC(=C3)/C=C/C(=O)OC)C(=O)C4CCCCC4	0.256594	0.66057	2755.63
Anacetrapib	C[C@H]1[C@H](OC(=O)N1CC2=C(C=CC(=C2)C(F)(F)F)C3=CC(=C(C=C3OC)F)C(C)C)C4=CC(=CC(=C4)C(F)(F)F)C(F)(F)F	0.252814	0.599629	2584.79
Afatinib	CN(C)C/C=C/C(=O)NC1=C(C=C2C(=C1)C(=NC=N2)NC3=CC(=C(C=C3)F)Cl)O[C@H]4CCOC4	0.457293	0.743397	2246.69
Piriprost	CCCCC[C@@H](/C=C/[C@H]1[C@@H](CC2=C1C=C(N2C3=CC=CC=C3)CCCCC(=O)O)O)O	0.337788	0.775009	2300.84
N-[(2S)-Butan-2-yl]-1-(2-chlorophenyl)-N-methylisoquinoline-3-carboxamide	CC[C@H](C)N(C)C(=O)C1=CC2=CC=CC=C2C(=N1)C3=CC=CC=C3Cl	0.62721	0.971442	1750.63
(5E)-5-[(3As,4S,5S,6aR)-5-hydroxy-4-[2-(1-hydroxycyclohexyl)ethynyl]-3,3a,4,5,6,6a-hexahydro-1H-pentalen-2-ylidene]pentanoic acid	C1CCC(CC1)(C#C[C@H]2[C@H](C[C@@H]3[C@@H]2C/C(=C/CCCC(=O)O)/C3)O)O	0.414674	0.86493	1709.71
Monomethyl auristatin E	CC[C@H](C)[C@@H]([C@@H](CC(=O)N1CCC[C@H]1[C@@H]([C@@H](C)C(=O)N[C@H](C)[C@H](C2=CC=CC=C2)O)OC)OC)N(C)C(=O)[C@H](C(C)C)NC(=O)[C@H](C(C)C)NC	0.160217	0.454974	3912.01
Btc, AM	CC1=CC(=C(C=C1)N(CC(=O)OCOC(=O)C)CC(=O)OCOC(=O)C)OCCOC2=C(C=C3C(=C2)C=C(C(=O)O3)C4=NC5=CC=CC=C5S4)N(CC(=O)OCOC(=O)C)CC(=O)OCOC(=O)C	0.0280041	0.6	4652.29
Lupeol	CC(=C)[C@@H]1CC[C@]2([C@H]1[C@H]3CC[C@@H]4[C@]5(CC[C@@H](C([C@@H]5CC[C@]4([C@@]3(CC2)C)C)(C)C)O)C)C	0.420722	0.609019	2646.63
Droperidol	C1CN(CC=C1N2C3=CC=CC=C3NC2=O)CCCC(=O)C4=CC=C(C=C4)F	0.664952	0.966278	2071.55
Rucaparib	CNCC1=CC=C(C=C1)C2=C3CCNC(=O)C4=C3C(=CC(=C4)F)N2	0.693922	0.86493	1667.3
N-(4-Chloro-2,5-dimethoxyphenyl)-5-cyclopropyl-3-isoxazolecarboxamide	COC1=CC(=C(C=C1NC(=O)C2=NOC(=C2)C3CC3)OC)Cl	0.911947	0.976499	1257.98
Benzyl ((S)-1-(((S)-1,2-dioxo-1-((pyridin-2-ylmethyl)amino)hexan-3-yl)amino)-4-methyl-1-oxopentan-2-yl)carbamate	CCC[C@@H](C(=O)C(=O)NCC1=CC=CC=N1)NC(=O)[C@H](CC(C)C)NC(=O)OCC2=CC=CC=C2	0.376973	0.585192	2374.47
(S)-N-(1-Amino-3-methyl-1-oxobutan-2-yl)-2-(cyclohexylmethyl)-2H-indazole-3-carboxamide	CC(C)[C@@H](C(=O)N)NC(=O)C1=C2C=CC=CC2=NN1CC3CCCCC3	0.833735	0.921306	1850
(R)-Suprofen	C[C@H](C1=CC=C(C=C1)C(=O)C2=CC=CS2)C(=O)O	0.858961	0.976499	1030.65
6R-Tetrahydrofolic acid	C1[C@H](NC2=C(N1)N=C(NC2=O)N)CNC3=CC=C(C=C3)C(=O)N[C@@H](CCC(=O)O)C(=O)O	0.251235	0.47269	1974.16
Tubacin	C1[C@@H](O[C@@H](O[C@@H]1C2=CC=C(C=C2)CO)C3=CC=C(C=C3)NC(=O)CCCCCCC(=O)NO)CSC4=NC(=C(O4)C5=CC=CC=C5)C6=CC=CC=C6	0.0340835	0.268983	3813.31
1-(2-(5-(2-Methoxyethoxy)benzimidazol-1-yl)quinolin-8-yl)piperidin-4-ylamine	COCCOC1=CC2=C(C=C1)N(C=N2)C3=NC4=C(C=CC=C4N5CCC(CC5)N)C=C3	0.483761	0.902831	2346.16
5-Methyl-4-[(1R,6S)-3-methyl-6-prop-1-en-2-ylcyclohex-2-en-1-yl]benzene-1,3-diol	CC1=C[C@H]([C@H](CC1)C(=C)C)C2=C(C=C(C=C2C)O)O	0.770705	0.921306	1295.13
(E)-4-[(2-Methoxycarbonyl-5-thiophen-2-ylthiophen-3-yl)amino]-4-oxobut-2-enoic acid	COC(=O)C1=C(C=C(S1)C2=CC=CS2)NC(=O)/C=C/C(=O)O	0.64632	0.920498	1169.43
Abn-cbd	CCCCCC1=C(C(=CC(=C1)O)O)[C@@H]2C=C(CC[C@H]2C(=C)C)C	0.510775	0.861081	1686.91
(2S,3S)-2-[[1-(Cyclohexylmethyl)indazole-3-carbonyl]amino]-3-methylbutanedioic acid	C[C@@H]([C@@H](C(=O)O)NC(=O)C1=NN(C2=CC=CC=C21)CC3CCCCC3)C(=O)O	0.671072	0.760242	1861.44
AM2201 8-Quinolinyl carboxamide	C1=CC=C2C(=C1)C(=CN2CCCCCF)C(=O)NC3=CC=CC4=C3N=CC=C4	0.428595	0.93886	2115.17
5-Methyl-4-((1R,6R)-3-methyl-6-(1-methylethenyl)-2-cyclohexen-1-yl)-1,3-benzenediol	CC1=C[C@H]([C@@H](CC1)C(=C)C)C2=C(C=C(C=C2C)O)O	0.770705	0.921306	1295.13
(3Z)-3-[(4-Hydroxyphenyl)methylidene]-5,6-dimethoxy-1H-indol-2-one	COC1=C(C=C2C(=C1)/C(=C/C3=CC=C(C=C3)O)/C(=O)N2)OC	0.854812	0.921306	1319.4
N-{4-[(3-Bromophenyl)amino]quinazolin-6-Yl}propanamide	CCC(=O)NC1=CC2=C(C=C1)N=CN=C2NC3=CC(=CC=C3)Br	0.709544	0.917829	1466.43
4-[(1-Oxo-7-phenylheptyl)amino]-(4R)-octanoic acid	CCCC[C@H](CCC(=O)O)NC(=O)CCCCCCC1=CC=CC=C1	0.478573	0.921306	1750.18
N-(5-(5-Cyanothiophen-2-yl)-2-methylphenyl)-4-methylbenzenesulfonamide	CC1=CC=C(C=C1)S(=O)(=O)NC2=C(C=CC(=C2)C3=CC=C(S3)C#N)C	0.725199	0.97451	1723.92
[(2S)-1-Hexadecoxy-3-(2,2,2-trifluoroethoxy)propan-2-yl] methyl hydrogen phosphate	CCCCCCCCCCCCCCCCOC[C@@H](COCC(F)(F)F)OP(=O)(O)OC	0.120139	0.611897	2126.43
JWH 122 3-methylnaphthyl isomer	CCCCCN1C=C(C2=CC=CC=C21)C(=O)C3=CC(=CC4=CC=CC=C43)C	0.284784	0.796	2205.46
Dienogest	C[C@]12CCC3=C4CCC(=O)C=C4CC[C@H]3[C@@H]1CC[C@]2(CC#N)O	0.800112	0.976499	1629.49
(3S,5S,6E)-7-[3-(4-Fluorophenyl)-1-(propan-2-yl)-1H-indol-2-yl]-3,5-dihydroxyhept-6-enoic acid	CC(C)N1C2=CC=CC=C2C(=C1/C=C/[C@H](C[C@@H](CC(=O)O)O)O)C3=CC=C(C=C3)F	0.504788	0.803356	2100.66
7-[5-[[4-[4-[(Dimethylamino)sulfonyl]-1-piperazinyl]phenoxy]methyl]-1,3-dimethyl-1H-pyrazol-4-yl]-1-[2-(4-morpholinyl)ethyl]-3-[3-(1-naphthalenyloxy)propyl]-1H-indole-2-carboxylic acid	CC1=NN(C(=C1C2=CC=CC3=C2N(C(=C3CCCOC4=CC=CC5=CC=CC=C54)C(=O)O)CCN6CCOCC6)COC7=CC=C(C=C7)N8CCN(CC8)S(=O)(=O)N(C)C)C	0.114803	0.556855	5104.94
Cambogin	CC(=CC[C@@H]1C[C@]23C[C@@H](C(OC2=C(C(=O)[C@@](C3=O)(C1(C)C)CC=C(C)C)C(=O)C4=CC(=C(C=C4)O)O)(C)C)CC=C(C)C)C	0.101603	0.508906	3358.34
N-[4-(4-Chloropiperidin-1-yl)sulfonylphenyl]-5-nitrofuran-2-carboxamide	C1CN(CCC1Cl)S(=O)(=O)C2=CC=C(C=C2)NC(=O)C3=CC=C(O3)[N+](=O)[O-]	0.456411	0.820393	1620.15
Fluvastatine	CC(C)N1C2=CC=CC=C2C(=C1/C=C/[C@@H](C[C@@H](CC(=O)O)O)O)C3=CC=C(C=C3)F	0.504788	0.803356	2100.66
N-[4-[2-(1,3-Benzodioxol-5-yl)-5-methoxy-1,2,4-triazol-3-yl]phenyl]-2-phenylsulfanylacetamide	COC1=NN(C(=N1)C2=CC=C(C=C2)NC(=O)CSC3=CC=CC=C3)C4=CC5=C(C=C4)OCO5	0.409062	0.82566	2170.6
(r)-Salmeterol	C1=CC=C(C=C1)CCCCOCCCCCCNC[C@@H](C2=CC(=C(C=C2)O)CO)O	0.31032	0.757305	2178.12
Streptothricin F	C1[C@H]([C@@H]2[C@@H](C(=O)N1)N=C(N2)N[C@H]3[C@@H]([C@@H]([C@H]([C@H](O3)CO)OC(=O)N)O)NC(=O)C[C@H](CCCN)N)O	0.141213	0.411905	2102.33
N-(4-Acetamidophenyl)indomethacin Amide	CC1=C(C2=C(N1C(=O)C3=CC=C(C=C3)Cl)C=CC(=C2)OC)CC(=O)NC4=CC=C(C=C4)NC(=O)C	0.377155	0.722023	2433.44
(1R,3As,5aR,5bR,7aS,9S,11aS,11bR,13aR,13bR)-3a-(hydroxymethyl)-5a,5b,11a-trimethyl-1-prop-1-en-2-yl-2,3,4,5,6,7,7a,8,9,10,11,11b,12,13,13a,13b-hexadecahydro-1H-cyclopenta[a]chrysen-9-ol	CC(=C)[C@@H]1CC[C@]2([C@H]1[C@H]3CC[C@@H]4[C@]5(CC[C@@H](C[C@@H]5CC[C@]4([C@@]3(CC2)C)C)O)C)CO	0.516049	0.732555	2487.61
(2-((5-Chloro-2-((4-(4-(dimethylamino)piperidin-1-yl)-2-methoxyphenyl)amino)pyrimidin-4-yl)amino)phenyl)dimethylphosphine oxide	CN(C)C1CCN(CC1)C2=CC(=C(C=C2)NC3=NC=C(C(=N3)NC4=CC=CC=C4P(=O)(C)C)Cl)OC	0.375828	0.7094	2584.72
Stigmasterol	CC[C@H](/C=C/[C@@H](C)[C@H]1CC[C@@H]2[C@@]1(CC[C@H]3[C@H]2CC=C4[C@@]3(CC[C@@H](C4)O)C)C)C(C)C	0.4566	0.639146	2528.62
ROCK Inhibitor	CC1=CNC2=NC=CC(=C12)OC3=C(C=C(C=C3F)NC4=CC(=NC(=N4)N)Cl)F	0.427117	0.805276	1705.87
Suc-Leu-Leu-Val-Tyr-AMC	CC1=CC(=O)OC2=C1C=CC(=C2)NC(=O)[C@H](CC3=CC=C(C=C3)O)NC(=O)[C@H](C(C)C)NC(=O)[C@H](CC(C)C)NC(=O)[C@H](CC(C)C)NC(=O)CCC(=O)O	0.087798	0.40044	4103.9
Ppack dihydrochloride	C1C[C@H](N(C1)C(=O)[C@@H](CC2=CC=CC=C2)N)C(=O)N[C@@H](CCCN=C(N)N)C(=O)CCl	0.159337	0.507073	1988.24
(2R)-2-Amino-3-[(4-methoxyphenyl)-diphenylmethyl]sulfanylpropan-1-ol	COC1=CC=C(C=C1)C(C2=CC=CC=C2)(C3=CC=CC=C3)SC[C@@H](CO)N	0.580146	0.910992	1775.24
(E)-4-(2-(2-Ethoxyphenyl)hydrazono)-3-methyl-1-(4-phenylthiazol-2-yl)-1H-pyrazol-5(4H)-one	CCOC1=CC=CC=C1N=NC2=C(NN(C2=O)C3=NC(=CS3)C4=CC=CC=C4)C	0.435209	0.910308	2031.27
N-Acetyl-Asp-Glu-Val-Asp-7-amido-4-trifluoromethylcoumarin	CC(C)[C@@H](C(=O)N[C@@H](CC(=O)O)C(=O)NC1=CC2=C(C=C1)C(=CC(=O)O2)C(F)(F)F)NC(=O)[C@H](CCC(=O)O)NC(=O)[C@H](CC(=O)O)NC(=O)C	0.101017	0.400067	3148.8
NO-Indomethacin	CC1=C(C2=C(N1C(=O)C3=CC=C(C=C3)Cl)C=CC(=C2)OC)CC(=O)SC[C@@H](C(=O)OCCCCO[N+](=O)[O-])NC(=O)C	0.12036	0.594209	2745.15
(S)-Vedaprofen	C[C@@H](C1=CC=C(C2=CC=CC=C21)C3CCCCC3)C(=O)O	0.852403	0.974114	1510.2
7-[(3R)-3-Aminopyrrolidin-1-yl]-8-chloro-1-cyclopropyl-6-fluoro-4-oxo-1,4-dihydroquinoline-3-carboxylic acid	C1CN(C[C@@H]1N)C2=C(C=C3C(=C2Cl)N(C=C(C3=O)C(=O)O)C4CC4)F	0.871298	0.920376	1617.9
Decernotinib	CC[C@](C)(C(=O)NCC(F)(F)F)NC1=NC(=NC=C1)C2=CNC3=C2C=CC=N3	0.59841	0.834378	1756.34
(E)-1-(4-Methylpiperazin-1-yl)-3-(5-nitrofuran-2-yl)prop-2-en-1-one	CN1CCN(CC1)C(=O)/C=C/C2=CC=C(O2)[N+](=O)[O-]	0.462032	1	1047.43
Nutlin-3B	CC(C)OC1=C(C=CC(=C1)OC)C2=N[C@@H]([C@@H](N2C(=O)N3CCNC(=O)C3)C4=CC=C(C=C4)Cl)C5=CC=C(C=C5)Cl	0.394015	0.711816	2727.25
Naphthalen-1-yl(1-pentyl-1H-pyrrol-3-yl)methanone	CCCCCN1C=CC(=C1)C(=O)C2=CC=CC3=CC=CC=C32	0.45924	0.933005	1673
Indinavir	CC(C)(C)NC(=O)[C@@H]1CN(CCN1C[C@H](C[C@@H](CC2=CC=CC=C2)C(=O)N[C@@H]3[C@@H](CC4=CC=CC=C34)O)O)CC5=CN=CC=C5	0.262823	0.556353	3469.25
(S)-Bentamapimod	C1COCCN1CC2=CC=C(C=C2)COC3=NC=CC(=N3)[C@@H](C#N)C4=NC5=CC=CC=C5S4	0.412078	0.853325	2264.14
AB-Fubinaca	CC(C)[C@@H](C(=O)N)NC(=O)C1=NN(C2=CC=CC=C21)CC3=CC=C(C=C3)F	0.700272	0.91935	1811.01
Buprenorphine	C[C@]([C@H]1C[C@@]23CC[C@@]1([C@H]4[C@@]25CCN([C@@H]3CC6=C5C(=C(C=C6)O)O4)CC7CC7)OC)(C(C)(C)C)O	0.686738	0.761303	2612.64
(R)-Vedaprofen	C[C@H](C1=CC=C(C2=CC=CC=C21)C3CCCCC3)C(=O)O	0.852403	0.974114	1510.2
8-(4-Dibenzothienyl)-2-(4-morpholinyl)-4H-1-benzopyran-4-one	C1COCCN1C2=CC(=O)C3=C(O2)C(=CC=C3)C4=CC=CC5=C4SC6=CC=CC=C56	0.374251	0.894778	2358.84
(S)-N-(4-(2-((4-Morpholinophenyl)amino)pyrimidin-4-yl)phenyl)pyrrolidine-2-carboxamide	C1C[C@H](NC1)C(=O)NC2=CC=C(C=C2)C3=NC(=NC=C3)NC4=CC=C(C=C4)N5CCOCC5	0.536637	0.738831	2293.66
JWH 398 5-chloronaphthyl isomer	CCCCCN1C=C(C2=CC=CC=C21)C(=O)C3=CC=CC4=C3C=CC=C4Cl	0.266004	0.761363	2105.1
Pyrimethamine	CCC1=C(C(=NC(=N1)N)N)C2=CC=C(C=C2)Cl	0.856137	0.921306	962.301
Rosuvastatin	CC(C)C1=NC(=NC(=C1/C=C/[C@H](C[C@H](CC(=O)O)O)O)C2=CC=C(C=C2)F)N(C)S(=O)(=O)C	0.469802	0.537993	2166.2
Methanone, (2-iodo-5-nitrophenyl)(1-(((2S)-1-methyl-2-piperidinyl)methyl)-1H-indol-3-yl)-	CN1CCCC[C@H]1CN2C=C(C3=CC=CC=C32)C(=O)C4=C(C=CC(=C4)[N+](=O)[O-])I	0.215786	0.811527	2059.58
Telithromycin	CC[C@@H]1[C@@]2([C@@H]([C@H](C(=O)[C@@H](C[C@@]([C@@H]([C@H](C(=O)[C@H](C(=O)O1)C)C)O[C@H]3[C@@H]([C@H](C[C@H](O3)C)N(C)C)O)(C)OC)C)C)N(C(=O)O2)CCCCN4C=C(N=C4)C5=CN=CC=C5)C	0.184283	0.581337	4494.54
1-Hexadecyl-3-trifluoroethyl-sn-glycero-2-phosphate methane	CCCCCCCCCCCCCCCCOC[C@H](COCC(F)(F)F)OP(=O)(O)OC	0.120139	0.611897	2126.43
Fdu-PB-22	C1=CC=C2C(=C1)C=CC=C2OC(=O)C3=CN(C4=CC=CC=C43)CC5=CC=C(C=C5)F	0.267905	0.846886	2263.51
N-Methyl-N-((2-(1-(2-(methylamino)ethyl)piperidin-4-yl)pyridin-4-yl)methyl)-3-phenoxybenzamide	CNCCN1CCC(CC1)C2=NC=CC(=C2)CN(C)C(=O)C3=CC(=CC=C3)OC4=CC=CC=C4	0.510035	0.828325	2513.02
3-[(21S,22S)-16-Ethenyl-11-ethyl-12,17,21,26-tetramethyl-4-oxo-7,23,24,25-tetrazahexacyclo[18.2.1.15,8.110,13.115,18.02,6]hexacosa-1,5,8(26),9,11,13,15,17,19-nonaen-22-yl]propanoic acid	CCC1=C(C2=CC3=C(C(=C(N3)C=C4[C@H]([C@@H](C(=C5CC(=O)C6=C5NC(=C6C)C=C1N2)N4)CCC(=O)O)C)C)C=C)C	0.321368	0.557526	3304.02
(5R)-N-[1-[3-(Dimethylamino)propyl]benzimidazol-2-yl]-5-methyl-1-oxo-2,3,4,5-tetrahydro-[1,4]diazepino[1,2-a]indole-8-carboxamide	C[C@@H]1CCNC(=O)C2=CC3=C(N12)C=C(C=C3)C(=O)NC4=NC5=CC=CC=C5N4CCCN(C)C	0.459186	0.773188	2642.97
2-[(2-Propan-2-yloxybenzoyl)amino]-N-[3-(trifluoromethylsulfonyl)phenyl]benzamide	CC(C)OC1=CC=CC=C1C(=O)NC2=CC=CC=C2C(=O)NC3=CC(=CC=C3)S(=O)(=O)C(F)(F)F	0.454594	0.709863	2286.5
1-Pentyl-3-(4-chloro-1-naphthoyl)indole	CCCCCN1C=C(C2=CC=CC=C21)C(=O)C3=CC=C(C4=CC=CC=C43)Cl	0.266004	0.761363	2105.1
1-(4-Chlorobenzoyl)-4-((4-(2-oxazolin-2-yl) benzylidene))piperidine	C1CN(CCC1=CC2=CC=C(C=C2)C3=NCCO3)C(=O)C4=CC=C(C=C4)Cl	0.789649	0.988254	1765.16
Pentosidine	C1=CN(C2=NC(=NC2=C1)NCCC[C@@H](C(=O)O)N)CCCC[C@@H](C(=O)O)N	0.331226	0.605604	1701.99
Pilaralisib	CC(C)(C(=O)NC1=CC(=CC=C1)S(=O)(=O)NC2=NC3=CC=CC=C3N=C2NC4=C(C=CC(=C4)OC)Cl)N	0.254887	0.459385	2630.54
3-(Benzenesulfonyl)-1-(4-fluorophenyl)pyrrolo[3,2-b]quinoxalin-2-amine	C1=CC=C(C=C1)S(=O)(=O)C2=C(N(C3=NC4=CC=CC=C4N=C23)C5=CC=C(C=C5)F)N	0.475776	0.900848	2220.1
2-[[(2R)-2-Methylbutyl]amino]-1-[(4S)-4-[(3-methylphenoxy)methyl]-6,7-dihydro-4H-thieno[3,2-c]pyridin-5-yl]ethanone	CC[C@@H](C)CNCC(=O)N1CCC2=C([C@H]1COC3=CC=CC(=C3)C)C=CS2	0.739326	0.957832	1945.78
2-[[(2S)-2-Methylbutyl]amino]-1-[(4S)-4-[(3-methylphenoxy)methyl]-6,7-dihydro-4H-thieno[3,2-c]pyridin-5-yl]ethanone	CC[C@H](C)CNCC(=O)N1CCC2=C([C@H]1COC3=CC=CC(=C3)C)C=CS2	0.739326	0.957832	1945.78
2',3',5'-Triacetyl-5-Azacytidine	CC(=O)OC[C@@H]1[C@H]([C@H]([C@@H](O1)N2C=NC(=NC2=O)N)OC(=O)C)OC(=O)C	0.476055	0.784854	1411.85
Desonide	C[C@]12C[C@@H]([C@H]3[C@H]([C@@H]1C[C@@H]4[C@]2(OC(O4)(C)C)C(=O)CO)CCC5=CC(=O)C=C[C@]35C)O	0.717749	0.848614	2085
Tapi-1	C[C@@H](C(=O)NCCN)NC(=O)[C@H](CC1=CC2=CC=CC=C2C=C1)NC(=O)[C@H](CC(C)C)CC(=O)NO	0.17791	0.426223	2534.08
Benzyl N-[(2R)-1-[[(3S)-1,2-dioxo-1-(pyridin-2-ylmethylamino)hexan-3-yl]amino]-4-methyl-1-oxopentan-2-yl]carbamate	CCC[C@@H](C(=O)C(=O)NCC1=CC=CC=N1)NC(=O)[C@@H](CC(C)C)NC(=O)OCC2=CC=CC=C2	0.376973	0.585192	2374.47
2-[[(2S)-2-Methylbutyl]amino]-1-[(4R)-4-[(3-methylphenoxy)methyl]-6,7-dihydro-4H-thieno[3,2-c]pyridin-5-yl]ethanone	CC[C@H](C)CNCC(=O)N1CCC2=C([C@@H]1COC3=CC=CC(=C3)C)C=CS2	0.739326	0.957832	1945.78
[(2R,3R,4S,5R)-3,4-Diacetyloxy-5-(4-amino-2-oxo-1,3,5-triazin-1-yl)oxolan-2-yl]methyl acetate	CC(=O)OC[C@@H]1[C@H]([C@@H]([C@@H](O1)N2C=NC(=NC2=O)N)OC(=O)C)OC(=O)C	0.476055	0.784854	1411.85
(2S,3R)-4-Amino-3-[[1-(cyclohexylmethyl)indazole-3-carbonyl]amino]-2-methyl-4-oxobutanoic acid	C[C@@H]([C@H](C(=O)N)NC(=O)C1=NN(C2=CC=CC=C21)CC3CCCCC3)C(=O)O	0.669794	0.738701	1894.95
Atorvastatin lactone	CC(C)C1=C(C(=C(N1CC[C@@H]2C[C@H](CC(=O)O2)O)C3=CC=C(C=C3)F)C4=CC=CC=C4)C(=O)NC5=CC=CC=C5	0.24116	0.563503	2937.81
4-Methoxyphenyl[6-bromo-2-methyl-1-(2-morpholinoethyl)-1H-indol-3-yl] ketone	CC1=C(C2=C(N1CCN3CCOCC3)C=C(C=C2)Br)C(=O)C4=CC=C(C=C4)OC	0.518639	0.853602	2029.65
2-[[(2R)-2-Methylbutyl]amino]-1-[(4R)-4-[(3-methylphenoxy)methyl]-6,7-dihydro-4H-thieno[3,2-c]pyridin-5-yl]ethanone	CC[C@@H](C)CNCC(=O)N1CCC2=C([C@@H]1COC3=CC=CC(=C3)C)C=CS2	0.739326	0.957832	1945.78
JWH 018 N-(1,1-dimethylpropyl) isomer	CCC(C)(C)N1C=C(C2=CC=CC=C21)C(=O)C3=CC=CC4=CC=CC=C43	0.406782	0.834198	2076.15
Smoothened agonist	CNC1CCC(CC1)N(CC2=CC(=CC=C2)C3=CC=NC=C3)C(=O)C4=C(C5=CC=CC=C5S4)Cl	0.324037	0.635895	2536.29
[4-[[4-(4-Ethoxyanilino)phenyl]-[4-[ethyl-[(3-sulfophenyl)methyl]amino]phenyl]methylidene]cyclohexa-2,5-dien-1-ylidene]-ethyl-[(3-sulfophenyl)methyl]azanium	CCN(CC1=CC(=CC=C1)S(=O)(=O)O)C2=CC=C(C=C2)C(=C3C=CC(=[N+](CC)CC4=CC(=CC=C4)S(=O)(=O)O)C=C3)C5=CC=C(C=C5)NC6=CC=C(C=C6)OCC	0.0700185	0.325956	4727.56
(3R,4Ar,5S,6S,6aS,10S,10aR,10bS)-6,10,10b-trihydroxy-3,4a,7,7,10a-pentamethyl-1-oxo-3-vinyldodecahydro-1H-benzo[f]chromen-5-yl 4-(4-methylpiperazin-1-yl)butanoate	C[C@@]1(CC(=O)[C@@]2([C@]3([C@H](CCC([C@@H]3[C@@H]([C@@H]([C@]2(O1)C)OC(=O)CCCN4CCN(CC4)C)O)(C)C)O)C)O)C=C	0.342892	0.589782	2729.66
Risperidone	CC1=C(C(=O)N2CCCCC2=N1)CCN3CCC(CC3)C4=NOC5=C4C=CC(=C5)F	0.657745	0.940361	2247.34
Z-Leu-Leu-Leu-MCA	CC1=CC(=O)OC2=C1C=CC(=C2)NC(=O)[C@H](CC(C)C)NC(=O)[C@H](CC(C)C)NC(=O)[C@H](CC(C)C)NC(=O)OCC3=CC=CC=C3	0.159927	0.426385	3563.97
Benzyl N-[(2S)-4-methyl-1-[[(2R)-4-methyl-1-[[(3S)-5-methyl-1-oxohexan-3-yl]amino]-1-oxopentan-2-yl]amino]-1-oxopentan-2-yl]carbamate	CC(C)C[C@@H](CC=O)NC(=O)[C@@H](CC(C)C)NC(=O)[C@H](CC(C)C)NC(=O)OCC1=CC=CC=C1	0.322605	0.63107	2433.5
alpha-Amanitine	CC[C@H](C)[C@H]1C(=O)NCC(=O)N[C@H]2C[S@@](=O)C3=C(C[C@@H](C(=O)NCC(=O)N1)NC(=O)[C@@H](NC(=O)[C@@H]4C[C@H](CN4C(=O)[C@@H](NC2=O)CC(=O)N)O)[C@@H](C)[C@H](CO)O)C5=C(N3)C=C(C=C5)O	0.123113	0.4	4556.02
N-((1S)-2-(Dimethylamino)-1-phenylethyl)-6,6-dimethyl-3-((2-methylthieno(3,2-d)pyrimidin-4-yl)amino)-4,6-dihydropyrrolo(3,4-C)pyrazole-5(1H)-carboxamide	CC1=NC2=C(C(=N1)NC3=NNC4=C3CN(C4(C)C)C(=O)N[C@H](CN(C)C)C5=CC=CC=C5)SC=C2	0.36706	0.668072	2532.25
(R)-Paliperidone	CC1=C(C(=O)N2CCC[C@H](C2=N1)O)CCN3CCC(CC3)C4=NOC5=C4C=CC(=C5)F	0.690289	0.88473	2273.37
[1-[(4R)-4-Fluoropentyl]indol-3-yl]-(2,2,3,3-tetramethylcyclopropyl)methanone	C[C@H](CCCN1C=C(C2=CC=CC=C21)C(=O)C3C(C3(C)C)(C)C)F	0.628178	0.895898	1748.55
PF-Cbp1	CCCOC1=CC=C(C=C1)CCC2=NC3=C(N2CCN4CCOCC4)C=CC(=C3)C5=C(ON=C5C)C	0.305169	0.815548	2745.14
AB-Chiminaca	CC(C)[C@@H](C(=O)N)NC(=O)C1=CN(C2=CC=CC=C21)CC3CCCCC3	0.832281	0.921306	1897.83
Oleanolic acid	C[C@]12CC[C@@H](C([C@@H]1CC[C@@]3([C@@H]2CC=C4[C@]3(CC[C@@]5([C@H]4CC(CC5)(C)C)C(=O)O)C)C)(C)C)O	0.409055	0.592373	2657.86
4-[(4S,5S)-4,5-Bis(4-chlorophenyl)-2-(4-methoxy-2-propan-2-yloxyphenyl)-4,5-dihydroimidazole-1-carbonyl]piperazin-2-one	CC(C)OC1=C(C=CC(=C1)OC)C2=N[C@H]([C@@H](N2C(=O)N3CCNC(=O)C3)C4=CC=C(C=C4)Cl)C5=CC=C(C=C5)Cl	0.394015	0.711816	2727.25
JWH 073 6-hydroxyindole metabolite	CCCCN1C=C(C2=C1C=C(C=C2)O)C(=O)C3=CC=CC4=CC=CC=C43	0.484038	0.950182	2018.48
2-[(1R,4S,8R,10S,13S,16S,27S,34S)-34-[(2S)-Butan-2-yl]-13-[(2R,3R)-3,4-dihydroxybutan-2-yl]-8,22-dihydroxy-2,5,11,14,27,30,33,36,39-nonaoxo-27lambda4-thia-3,6,12,15,25,29,32,35,38-nonazapentacyclo[14.12.11.06,10.018,26.019,24]nonatriaconta-18(26),19(24),20,22-tetraen-4-yl]acetamide	CC[C@H](C)[C@H]1C(=O)NCC(=O)N[C@H]2C[S@](=O)C3=C(C[C@@H](C(=O)NCC(=O)N1)NC(=O)[C@@H](NC(=O)[C@@H]4C[C@H](CN4C(=O)[C@@H](NC2=O)CC(=O)N)O)[C@@H](C)[C@H](CO)O)C5=C(N3)C=C(C=C5)O	0.123113	0.4	4556.02
[1-[(3S)-3-Hydroxypentyl]indol-3-yl]-naphthalen-1-ylmethanone	CC[C@@H](CCN1C=C(C2=CC=CC=C21)C(=O)C3=CC=CC4=CC=CC=C43)O	0.48279	0.973051	2125.59
Phalloidin	C[C@H]1C(=O)N[C@H]2CC3=C(NC4=CC=CC=C34)SC[C@@H](C(=O)N5C[C@H](C[C@H]5C(=O)N1)O)NC(=O)[C@H](NC(=O)[C@@H](NC(=O)[C@@H](NC2=O)C[C@](C)(CO)O)C)[C@H](C)O	0.142604	0.4	3880.55
Alvocidib	CN1CC[C@@H]([C@@H](C1)O)C2=C(C=C(C3=C2OC(=CC3=O)C4=CC=CC=C4Cl)O)O	0.609599	0.819857	1887.03
N-[[1-[(4-Fluorophenyl)methyl]-1H-indol-3-yl]carbonyl]-3-methyl-L-valine,methylester	CC(C)(C)[C@@H](C(=O)OC)NC(=O)C1=CN(C2=CC=CC=C21)CC3=CC=C(C=C3)F	0.659438	0.942778	1997.32
1-N,3-N-Bis[(2R)-2,3-dihydroxypropyl]-2,4,6-triiodo-5-[(2-methoxyacetyl)amino]-3-N-methylbenzene-1,3-dicarboxamide	CN(C[C@H](CO)O)C(=O)C1=C(C(=C(C(=C1I)C(=O)NC[C@H](CO)O)I)NC(=O)COC)I	0.164792	0.408651	1685.93
Ethyl (3S)-3-[[(4-chlorophenyl)methyl-[(5-nitrothiophen-2-yl)methyl]amino]methyl]pyrrolidine-1-carboxylate	CCOC(=O)N1CC[C@H](C1)CN(CC2=CC=C(C=C2)Cl)CC3=CC=C(S3)[N+](=O)[O-]	0.438009	0.886006	1836.52
(1-(3-Hydroxybutyl)-1H-indol-3-yl)(naphthalen-1-yl)methanone	C[C@@H](CCN1C=C(C2=CC=CC=C21)C(=O)C3=CC=CC4=CC=CC=C43)O	0.529128	0.976499	2022.48
N-(2-Phenylethyl)indomethacin Amide	CC1=C(C2=C(N1C(=O)C3=CC=C(C=C3)Cl)C=CC(=C2)OC)CC(=O)NCCC4=CC=CC=C4	0.411977	0.821026	2378.52
4-[(R)-[(2S,5R)-2,5-Dimethyl-4-propylpiperazin-1-yl]-(3-methoxyphenyl)methyl]-N,N-diethylbenzamide	CCCN1C[C@@H](N(C[C@H]1C)[C@H](C2=CC=C(C=C2)C(=O)N(CC)CC)C3=CC(=CC=C3)OC)C	0.533218	0.857848	2493.15
(1R)-1-Cyclohexyl-2-[(5R)-5H-imidazo[5,1-a]isoindol-5-yl]ethanol	C1CCC(CC1)[C@@H](C[C@@H]2C3=CC=CC=C3C4=CN=CN24)O	0.929908	0.975551	1517.33
(1S,2R)-2-Hexylcyclopropanedecanoic acid	CCCCCC[C@@H]1C[C@@H]1CCCCCCCCCC(=O)O	0.365829	0.873394	1564.6
Ethyl (3R)-3-[[(4-chlorophenyl)methyl-[(5-nitrothiophen-2-yl)methyl]amino]methyl]pyrrolidine-1-carboxylate	CCOC(=O)N1CC[C@@H](C1)CN(CC2=CC=C(C=C2)Cl)CC3=CC=C(S3)[N+](=O)[O-]	0.438009	0.886006	1836.52
Desmethylsildenafil	CCCC1=NN(C2=C1N=C(NC2=O)C3=C(C=CC(=C3)S(=O)(=O)N4CCNCC4)OCC)C	0.54435	0.68279	2404.35
Duloxetine	CNCC[C@@H](C1=CC=CS1)OC2=CC=CC3=CC=CC=C32	0.715924	0.905438	1506
Akt inhibitor VIII	C1CN(CCC1N2C3=CC=CC=C3NC2=O)CC4=CC=C(C=C4)C5=C(N=C6C=C7C(=NC=N7)C=C6N5)C8=CC=CC=C8	0.26105	0.60287	3550.5
7-Dehydrocholesterol	C[C@H](CCCC(C)C)[C@H]1CC[C@@H]2[C@@]1(CC[C@H]3C2=CC=C4[C@@]3(CC[C@@H](C4)O)C)C	0.526628	0.696933	2316.64
N-(1-Amino-3S-methyl-1-oxopentan-2S-yl)-2-(5-fluoropentyl)-2H-indazole-3-carboxamide	CC[C@H](C)[C@@H](C(=O)N)NC(=O)C1=C2C=CC=CC2=NN1CCCCCF	0.636916	0.92114	1795.41
Epitestosterone	C[C@]12CC[C@H]3[C@H]([C@@H]1CC[C@H]2O)CCC4=CC(=O)CC[C@]34C	0.73423	0.974685	1552.68
(2R)-2-(5-Fluoro-2-hydroxyphenyl)-2-(1-oxo-1,3-dihydro-2H-isoindol-2-yl)-N-(1,3-thiazol-2-yl)acetamide	C1C2=CC=CC=C2C(=O)N1[C@H](C3=C(C=CC(=C3)F)O)C(=O)NC4=NC=CS4	0.724063	0.906655	1650.68
Zanamivir	CC(=O)N[C@@H]1[C@H](C=C(O[C@H]1[C@@H]([C@@H](CO)O)O)C(=O)O)N=C(N)N	0.188042	0.600658	1147.78
4-[(1S,3R)-2,2,3-Trimethylcyclopentyl]butanoic acid	C[C@@H]1CC[C@@H](C1(C)C)CCCC(=O)O	0.752075	0.974685	878.175
[4-({6-[Allyl(methyl)amino]hexyl}oxy)-2-fluorophenyl](4-bromophenyl)methanone	CN(CCCCCCOC1=CC(=C(C=C1)C(=O)C2=CC=C(C=C2)Br)F)CC=C	0.230924	0.778276	1861.58
Radotinib	CC1=C(C=C(C=C1)C(=O)NC2=CC(=CC(=C2)C(F)(F)F)N3C=C(N=C3)C)NC4=NC=CC(=N4)C5=NC=CN=C5	0.287589	0.634025	2633.03
CK1 Inhibitor	C1COC2=C(O1)C=CC(=C2)C3=C(NC(=N3)C4=CC=C(C=C4)C(=O)N)C5=CC=CC=N5	0.54586	0.86599	2053.69
Fevipiprant	CC1=C(C2=C(N1CC3=C(C=C(C=C3)S(=O)(=O)C)C(F)(F)F)N=CC=C2)CC(=O)O	0.675194	0.884882	1900.61
Amastatin	CC(C)C[C@H]([C@@H](C(=O)N[C@@H](C(C)C)C(=O)N[C@@H](C(C)C)C(=O)N[C@@H](CC(=O)O)C(=O)O)O)N	0.165149	0.432844	1991.27
7-[(1R,2R,3S,5S)-3,5-Dihydroxy-2-[(E,3R)-3-hydroxyoct-1-enyl]cyclopentyl]heptanoic acid	CCCCC[C@H](/C=C/[C@H]1[C@H](C[C@@H]([C@@H]1CCCCCCC(=O)O)O)O)O	0.299854	0.820098	1719.96
5,10,15,20-Tetrakis(1-methylpyridin-1-ium-4-yl)-21,22,23,24-tetrahydroporphyrin	C[N+]1=CC=C(C=C1)C2=C3C=CC(=C(C4=CC=C(N4)C(=C5C=CC(=C(C6=CC=C2N6)C7=CC=[N+](C=C7)C)N5)C8=CC=[N+](C=C8)C)C9=CC=[N+](C=C9)C)N3	0.204201	0.627067	4229.46
(1-(5-Fluoropentyl)-1H-indazole-3-carbonyl)-L-valine	CC(C)[C@@H](C(=O)O)NC(=O)C1=NN(C2=CC=CC=C21)CCCCCF	0.681705	0.921306	1646.91
Ma-chminaca	CC(C)[C@@H](C(=O)OC)NC(=O)C1=NN(C2=CC=CC=C21)CC3CCCCC3	0.788389	0.972871	1913.68
NF-kB Activation Inhibitor IV	COC1=CC=C(C=C1)/C=C/C2=CC=CC=C2F	0.721223	0.861242	1015.66
Benzyloxycarbonyl-Val-Ala-Asp(OMe)-fluoromethylketone	C[C@@H](C(=O)N[C@@H](CC(=O)OC)C(=O)CF)NC(=O)[C@H](C(C)C)NC(=O)OCC1=CC=CC=C1	0.390139	0.555262	1971.97
8-Chloro-dibenz[b,f][1,4]oxazepine-10(11H)-carboxylic acid 2-[3-[(2-furanylmethyl)thio]-1-oxopropyl]hydrazide	C1C2=CC=CC=C2OC3=C(N1C(=O)NNC(=O)CCSCC4=CC=CO4)C=C(C=C3)Cl	0.410587	0.772886	1993.96
(S)-Fexofenadine	CC(C)(C1=CC=C(C=C1)[C@H](CCCN2CCC(CC2)C(C3=CC=CC=C3)(C4=CC=CC=C4)O)O)C(=O)O	0.341306	0.652812	2674.11
(E)-N-(2-Amino-4-fluorophenyl)-3-(1-cinnamyl-1H-pyrazol-4-yl)acrylamide	C1=CC=C(C=C1)/C=C/CN2C=C(C=N2)/C=C/C(=O)NC3=C(C=C(C=C3)F)N	0.51471	0.921145	1824.41
5-(4-Chlorophenyl)-1-(4-methoxyphenyl)-3-(trifluoromethyl)-1H-pyrazole	COC1=CC=C(C=C1)N2C(=CC(=N2)C(F)(F)F)C3=CC=C(C=C3)Cl	0.645843	0.957391	1345.72
Methyl-1-(5-fluoropentyl)-1H-indole-3-carboxylate	COC(=O)C1=CN(C2=CC=CC=C21)CCCCCF	0.589061	0.981667	1257.25
[1-[(4R)-4-Hydroxypentyl]indol-3-yl]-(4-methylnaphthalen-1-yl)methanone	CC1=CC=C(C2=CC=CC=C12)C(=O)C3=CN(C4=CC=CC=C43)CCC[C@@H](C)O	0.455118	0.949818	2232.07
Dehydroergosterol	C[C@H](/C=C/[C@H](C)C(C)C)[C@H]1CC[C@@H]2[C@@]1(CC=C3C2=CC=C4[C@@]3(CC[C@@H](C4)O)C)C	0.497773	0.684373	2377.38
N-[3-(2,1,3-Benzothiadiazol-5-ylamino)quinoxalin-2-yl]-4-methylbenzenesulfonamide	CC1=CC=C(C=C1)S(=O)(=O)NC2=NC3=CC=CC=C3N=C2NC4=CC5=NSN=C5C=C4	0.407616	0.749641	2252
3-(3-(N-(2-Chloro-3-trifluoromethylbenzyl)(2,2-diphenylethyl)amino)propoxy)phenylacetic acid	C1=CC=C(C=C1)C(CN(CCCOC2=CC=CC(=C2)CC(=O)O)CC3=C(C(=CC=C3)C(F)(F)F)Cl)C4=CC=CC=C4	0.162132	0.578405	2803.38
N,N'-Dimethyl-N-({3-[4-({trans-3-[2-(Tetrahydro-2h-Pyran-4-Yl)ethoxy]cyclobutyl}oxy)phenyl]-1h-Pyrazol-4-Yl}methyl)ethane-1,2-Diamine	CNCCN(C)CC1=C(NN=C1)C2=CC=C(C=C2)OC3CC(C3)OCCC4CCOCC4	0.524508	0.798833	2330.92
8-Chloro-4-phenylsulfanyl-1-(trifluoromethyl)-[1,2,4]triazolo[4,3-a]quinoxaline	C1=CC=C(C=C1)SC2=NC3=C(C=C(C=C3)Cl)N4C2=NN=C4C(F)(F)F	0.484922	0.98734	1464.62
N-(2,2,2-Trifluoroethyl)-N-{4-[2,2,2-trifluoro-1-hydroxy-1-(trifluoromethyl)ethyl]phenyl}benzenesulfonamide	C1=CC=C(C=C1)S(=O)(=O)N(CC(F)(F)F)C2=CC=C(C=C2)C(C(F)(F)F)(C(F)(F)F)O	0.627349	0.802381	1507.59
N-(1,3-Benzothiazol-2-yl)-4-[(2-hydroxy-3-methoxyphenyl)methylamino]benzenesulfonamide	COC1=CC=CC(=C1O)CNC2=CC=C(C=C2)S(=O)(=O)NC3=NC4=CC=CC=C4S3	0.392438	0.732379	2067.01
Silodosin	C[C@H](CC1=CC2=C(C(=C1)C(=O)N)N(CC2)CCCO)NCCOC3=CC=CC=C3OCC(F)(F)F	0.369831	0.675075	2304.77
(2R,3S)-4-Amino-3-[[1-(cyclohexylmethyl)indazole-3-carbonyl]amino]-2-methyl-4-oxobutanoic acid	C[C@H]([C@@H](C(=O)N)NC(=O)C1=NN(C2=CC=CC=C21)CC3CCCCC3)C(=O)O	0.669794	0.738701	1894.95
(6S)-2-Amino-6-[(1R,2R)-1,2-dihydroxypropyl]-5,6,7,8-tetrahydro-3H-pteridin-4-one	C[C@H]([C@@H]([C@@H]1CNC2=C(N1)C(=O)NC(=N2)N)O)O	0.362864	0.66304	957.694
1,2-Distearoyl-sn-glycerol	CCCCCCCCCCCCCCCCCC(=O)OC[C@H](CO)OC(=O)CCCCCCCCCCCCCCCCC	0.0554317	0.576511	3712.49
Ethyl-[4-[[4-[ethyl-[(3-sulfophenyl)methyl]amino]phenyl]-(4-hydroxy-2-sulfophenyl)methylidene]cyclohexa-2,5-dien-1-ylidene]-[(3-sulfophenyl)methyl]azanium	CCN(CC1=CC(=CC=C1)S(=O)(=O)O)C2=CC=C(C=C2)C(=C3C=CC(=[N+](CC)CC4=CC(=CC=C4)S(=O)(=O)O)C=C3)C5=C(C=C(C=C5)O)S(=O)(=O)O	0.101393	0.377674	4158.45
8-Ethenyl-1-hydroxy-10,12-dimethoxy-4-[(2S,3S,4R,5S,6R)-3,4,5-trihydroxy-4,6-dimethyloxan-2-yl]naphtho[1,2-c]isochromen-6-one	C[C@@H]1[C@@H]([C@@]([C@H]([C@@H](O1)C2=C3C(=C(C=C2)O)C(=CC4=C3OC(=O)C5=C4C(=CC(=C5)C=C)OC)OC)O)(C)O)O	0.241262	0.489617	2724.19
CB-5083	CC1=CC2=C(C=CC=C2N1C3=NC4=C(COCC4)C(=N3)NCC5=CC=CC=C5)C(=O)N	0.522051	0.852914	2255.09
4-[(4R,5R)-4,5-Bis(4-chlorophenyl)-2-(4-methoxy-2-propan-2-yloxyphenyl)-4,5-dihydroimidazole-1-carbonyl]piperazin-2-one	CC(C)OC1=C(C=CC(=C1)OC)C2=N[C@@H]([C@H](N2C(=O)N3CCNC(=O)C3)C4=CC=C(C=C4)Cl)C5=CC=C(C=C5)Cl	0.394015	0.711816	2727.25
JWH 200 6-hydroxyindole metabolite	C1COCCN1CCN2C=C(C3=C2C=C(C=C3)O)C(=O)C4=CC=CC5=CC=CC=C54	0.513449	0.935793	2283.35
(E)-2-((1,4-Dimethylpiperazin-2-ylidene)amino)-5-nitro-N-phenylbenzamide	CN1CCN(C(=NC2=C(C=C(C=C2)[N+](=O)[O-])C(=O)NC3=CC=CC=C3)C1)C	0.662701	0.974851	1724.91
(6S)-5,6,7,8-Tetrahydrofolate	C1[C@@H](NC2=C(N1)N=C(NC2=O)N)CNC3=CC=C(C=C3)C(=O)N[C@@H](CCC(=O)O)C(=O)O	0.251235	0.47269	1974.16
(4-Bromonaphthalen-1-yl)-(1-pentylindol-3-yl)methanone	CCCCCN1C=C(C2=CC=CC=C21)C(=O)C3=CC=C(C4=CC=CC=C43)Br	0.243698	0.68226	2105.1
(9S,10S)-9-Hydroxy-10-(propan-2-ylamino)-1,3-diazatricyclo[6.4.1.0^{4,13}]trideca-4(13),5,7-trien-2-one	CC(C)N[C@H]1CCN2C3=C([C@@H]1O)C=CC=C3NC2=O	0.758799	0.86493	1360.37
C-12 NBD-dihydro-Ceramide	CCCCCCCCCCCCCCC[C@H]([C@H](CO)NC(=O)CCCCCCCCCCCNC1=CC=C(C2=NON=C12)[N+](=O)[O-])O	0.0351146	0.23706	3775.32
4-[(1R,3R)-2,2,3-Trimethylcyclopentyl]butanoic acid	C[C@@H]1CC[C@H](C1(C)C)CCCC(=O)O	0.752075	0.974685	878.175
(2S)-2-(3-Chloro-N-(2-chloroacetyl)-4-methoxyanilino)-N-(2-phenylethyl)-2-thiophen-2-ylacetamide	COC1=C(C=C(C=C1)N([C@H](C2=CC=CS2)C(=O)NCCC3=CC=CC=C3)C(=O)CCl)Cl	0.437513	0.805304	1959.43
(2S)-2-[(1S,14R,18S,20S,23S,28S,31S,34R)-28-[(2S)-2,3-Dihydroxy-2-methylpropyl]-18-hydroxy-23-methyl-15,21,24,26,29,32,35-heptaoxo-31-propan-2-yl-12-thia-10,16,22,25,27,30,33,36-octazapentacyclo[12.11.11.03,11.04,9.016,20]hexatriaconta-3(11),4,6,8-tetraen-34-yl]-2-hydroxyacetic acid	C[C@H]1C(=O)N[C@H]2CC3=C(NC4=CC=CC=C34)SC[C@@H](C(=O)N5C[C@H](C[C@H]5C(=O)N1)O)NC(=O)[C@H](NC(=O)[C@@H](NC(=O)[C@@H](NC2=O)C[C@@](C)(CO)O)C(C)C)[C@@H](C(=O)O)O	0.131816	0.4	4116.57
2,2-Dimethyl-N-(2,4,6-trimethoxyphenyl)dodecanamide	CCCCCCCCCCC(C)(C)C(=O)NC1=C(C=C(C=C1OC)OC)OC	0.381877	0.843954	1935.04
alpha-Amanitin, 1-l-aspartic acid-	CC[C@H](C)[C@H]1C(=O)NCC(=O)N[C@H]2C[S@@](=O)C3=C(C[C@@H](C(=O)NCC(=O)N1)NC(=O)[C@@H](NC(=O)[C@@H]4C[C@H](CN4C(=O)[C@@H](NC2=O)CC(=O)O)O)[C@@H](C)[C@H](CO)O)C5=C(N3)C=C(C=C5)O	0.123393	0.4	4518.07
2-[(1R,4S,8R,10S,13S,16S,27S,34S)-34-[(2S)-Butan-2-yl]-13-[(2R,3R)-3,4-dihydroxybutan-2-yl]-8,22-dihydroxy-2,5,11,14,27,30,33,36,39-nonaoxo-27lambda4-thia-3,6,12,15,25,29,32,35,38-nonazapentacyclo[14.12.11.06,10.018,26.019,24]nonatriaconta-18(26),19(24),20,22-tetraen-4-yl]acetic acid	CC[C@H](C)[C@H]1C(=O)NCC(=O)N[C@H]2C[S@](=O)C3=C(C[C@@H](C(=O)NCC(=O)N1)NC(=O)[C@@H](NC(=O)[C@@H]4C[C@H](CN4C(=O)[C@@H](NC2=O)CC(=O)O)O)[C@@H](C)[C@H](CO)O)C5=C(N3)C=C(C=C5)O	0.123393	0.4	4518.07
2-[(4,6-Dimethylpyrimidin-2-yl)sulfanyl]-N-[5-(naphthalen-1-ylmethyl)-1,3-thiazol-2-yl]acetamide	CC1=CC(=NC(=N1)SCC(=O)NC2=NC=C(S2)CC3=CC=CC4=CC=CC=C43)C	0.350171	0.896606	1981.93
(S)-(+)-JWH 018 N-(4-hydroxypentyl) metabolite	C[C@@H](CCCN1C=C(C2=CC=CC=C21)C(=O)C3=CC=CC4=CC=CC=C43)O	0.48279	0.973051	2125.59
Fluvastatin	CC(C)N1C2=CC=CC=C2C(=C1/C=C/[C@H](C[C@H](CC(=O)O)O)O)C3=CC=C(C=C3)F	0.504788	0.803356	2100.66
Tyrosine kinase inhibitor	C1CC1(C(=O)NC2=CC=C(C=C2)OC3=C4C=C(NC4=NC=C3)C(=O)NCCN5CCOCC5)C(=O)NC6=CC=C(C=C6)F	0.206851	0.483788	3034.46
3-[18-(2-Carboxyethyl)-8,13-bis(ethenyl)-3,7,12,17,22-pentamethyl-23,24-dihydro-21H-porphyrin-2-yl]propanoic acid	CC1=C(C2=CC3=C(C(=C(N3)C=C4C(=C(C(=CC5=C(C(=C(N5C)C=C1N2)C)C=C)N4)C)C=C)C)CCC(=O)O)CCC(=O)O	0.193864	0.502914	3666.15
2-Nitro-5-(phenylsulfonyl)phenyl 4-chlorobenzoate	C1=CC=C(C=C1)S(=O)(=O)C2=CC(=C(C=C2)[N+](=O)[O-])OC(=O)C3=CC=C(C=C3)Cl	0.265124	0.906224	1724.84
Fluvastatin sodium anti-isomer free acid	CC(C)N1C2=CC=CC=C2C(=C1/C=C/[C@@H](C[C@H](CC(=O)O)O)O)C3=CC=C(C=C3)F	0.504788	0.803356	2100.66
JWH 018 8-quinolinyl carboxamide	CCCCCN1C=C(C2=CC=CC=C21)C(=O)NC3=CC=CC4=C3N=CC=C4	0.454471	0.940293	2109.24
N5,N6-Bis(2-Fluorophenyl)-[1,2,5]oxadiazolo[3,4-b]pyrazine-5,6-diamine	C1=CC=C(C(=C1)NC2=NC3=NON=C3N=C2NC4=CC=CC=C4F)F	0.58424	0.921306	1351.19
Methyl (S)-3-hydroxypalmitate	CCCCCCCCCCCCC[C@@H](CC(=O)OC)O	0.374454	0.976499	1382.22
N-[(1S)-1-[4-[(2,4-Dimethoxyphenyl)methyl]-5-(2-phenylethyl)-1,2,4-triazol-3-yl]-2-(2H-indol-3-yl)ethyl]pyridine-2-carboxamide	COC1=CC(=C(C=C1)CN2C(=NN=C2[C@H](CC3=C4C=CC=CC4=NC3)NC(=O)C5=CC=CC=N5)CCC6=CC=CC=C6)OC	0.238186	0.757345	3491.26
Lometrexol	C1[C@H](CNC2=C1C(=O)NC(=N2)N)CCC3=CC=C(C=C3)C(=O)N[C@@H](CCC(=O)O)C(=O)O	0.322668	0.47925	2068.29
(2R)-1-Phenyl-2-pyrrolidin-1-yloctan-1-one	CCCCCC[C@H](C(=O)C1=CC=CC=C1)N2CCCC2	0.519575	0.923186	1401.09
1-(1-(3-Methoxyphenyl)cyclohexyl)piperidine	COC1=CC=CC(=C1)C2(CCCCC2)N3CCCCC3	0.811967	0.877551	1410.76
(R)-9-(4-(1-(Dimethylamino)propan-2-yl)phenyl)-8-hydroxy-6-methylthieno[2,3-c]quinolin-4(5H)-one	CC1=CC(=C(C2=C1NC(=O)C3=C2C=CS3)C4=CC=C(C=C4)[C@@H](C)CN(C)C)O	0.508613	0.89319	2149.86
(22r)-22-Hydroxycholes-terol	C[C@H]([C@H]1CC[C@@H]2[C@@]1(CC[C@H]3[C@H]2CC=C4[C@@]3(CC[C@@H](C4)O)C)C)[C@@H](CCC(C)C)O	0.525292	0.756007	2366.83
5-(2,4-Disulfophenyl)-3-(2-methoxy-4-nitrophenyl)-2-(4-nitrophenyl)-2H-tetrazol-3-ium	COC1=C(C=CC(=C1)[N+](=O)[O-])[N+]2=NC(=NN2C3=CC=C(C=C3)[N+](=O)[O-])C4=C(C=C(C=C4)S(=O)(=O)O)S(=O)(=O)O	0.130376	0.521555	2523.02
Boldenone	C[C@]12CC[C@H]3[C@H]([C@@H]1CC[C@@H]2O)CCC4=CC(=O)C=C[C@]34C	0.737699	0.974685	1534.48
(5R)-1,3-Bis(4-bromophenyl)-5-phenylimidazolidine-2,4-dione	C1=CC=C(C=C1)[C@@H]2C(=O)N(C(=O)N2C3=CC=C(C=C3)Br)C4=CC=C(C=C4)Br	0.431378	0.752179	1648.6
Unii-LX8LF7G0S5	C1CCC(CC1)C(C[C@H]2CCCCN2)C3CCCCC3	0.735407	0.843181	1465.4
Quinolin-8-yl 1-pentyl-1H-indole-3-carboxylate	CCCCCN1C=C(C2=CC=CC=C21)C(=O)OC3=CC=CC4=C3N=CC=C4	0.255965	0.967164	2074.22
(2S)-2-(5-Fluoro-2-hydroxyphenyl)-2-(3-oxo-1H-isoindol-2-yl)-N-(1,3-thiazol-2-yl)acetamide	C1C2=CC=CC=C2C(=O)N1[C@@H](C3=C(C=CC(=C3)F)O)C(=O)NC4=NC=CS4	0.724063	0.906655	1650.68
[(4Ar,6R,7R,7aR)-6-[2-(butanoylamino)-6-oxo-1H-purin-9-yl]-2-hydroxy-2-oxo-4a,6,7,7a-tetrahydro-4H-furo[3,2-d][1,3,2]dioxaphosphinin-7-yl] butanoate	CCCC(=O)NC1=NC2=C(C(=O)N1)N=CN2[C@H]3[C@@H]([C@H]4[C@H](O3)COP(=O)(O4)O)OC(=O)CCC	0.375124	0.488938	2142.77
Fenofibric acid	CC(C)(C(=O)O)OC1=CC=C(C=C1)C(=O)C2=CC=C(C=C2)Cl	0.851337	0.976499	1229.55
(1~{r})-1-Cyclohexyl-2-[(5~{s})-5~{h}-Imidazo[1,5-B]isoindol-5-Yl]ethanol	C1CCC(CC1)[C@@H](C[C@H]2C3=CC=CC=C3C4=CN=CN24)O	0.929908	0.975551	1517.33
JWH 398 N-pentanoic acid metabolite	C1=CC=C2C(=C1)C(=CC=C2Cl)C(=O)C3=CN(C4=CC=CC=C43)CCCCC(=O)O	0.305776	0.855122	2134.87
(2S)-1-(6,7-Dimethoxy-3,4-dihydro-1H-isoquinolin-2-yl)-3,3-dimethyl-2-(pyridin-4-ylmethylamino)butan-1-one	CC(C)(C)[C@@H](C(=O)N1CCC2=CC(=C(C=C2C1)OC)OC)NCC3=CC=NC=C3	0.811083	0.940982	1984.47
5-Fluoro CUMYL-PICA	CC(C)(C1=CC=CC=C1)NC(=O)C2=CN(C3=CC=CC=C32)CCCCCF	0.528817	0.947671	1996.09
3,4-Dichloro-N-[[1-(1-piperidinyl)cyclohexyl]methyl]-benzamide	C1CCC(CC1)(CNC(=O)C2=CC(=C(C=C2)Cl)Cl)N3CCCCC3	0.817776	0.959949	1533.02
Isoquinolin-5-yl1-pentyl-1H-indole-3-carboxylate	CCCCCN1C=C(C2=CC=CC=C21)C(=O)OC3=CC=CC4=C3C=CN=C4	0.255965	0.967164	2082.47
Acetyl Podocarpic acid anhydride	CC(=O)OC1=CC2=C(CC[C@@H]3[C@@]2(CCC[C@]3(C)C(=O)OC(=O)[C@]4(CCC[C@]5([C@H]4CCC6=C5C=C(C=C6)OC(=O)C)C)C)C)C=C1	0.202165	0.609419	3278.2
2-(3-(2-((3-Fluoro-4-(4-methylpiperazin-1-yl)phenyl)amino)-5-methyl-7H-pyrrolo[2,3-d]pyrimidin-4-yl)phenyl)acetonitrile	CC1=CNC2=NC(=NC(=C12)C3=CC=CC(=C3)CC#N)NC4=CC(=C(C=C4)N5CCN(CC5)C)F	0.456402	0.777597	2464.1
Cannabidiolic acid	CCCCCC1=CC(=C(C(=C1C(=O)O)O)[C@@H]2C=C(CC[C@H]2C(=C)C)C)O	0.441286	0.837357	1810.75
JWH 122 5-methylnaphthyl isomer	CCCCCN1C=C(C2=CC=CC=C21)C(=O)C3=CC=CC4=C(C=CC=C43)C	0.284784	0.796	2205.46
1-(1-(2-(Methylsulfonyl)phenyl)-7-propoxyindolizin-3-yl)ethanone	CCCOC1=CC2=C(C=C(N2C=C1)C(=O)C)C3=CC=CC=C3S(=O)(=O)C	0.614453	0.996386	1935.44
{4-[({2-[3-Fluoro-4-(Trifluoromethyl)phenyl]-4-Methyl-1,3-Thiazol-5-Yl}methyl)sulfanyl]-2-Methylphenoxy}acetic Acid	CC1=C(C=CC(=C1)SCC2=C(N=C(S2)C3=CC(=C(C=C3)C(F)(F)F)F)C)OCC(=O)O	0.321871	0.693511	1762.32
(2S)-2-[(1S,14R,18S,20S,23S,28S,31S,34R)-28-[(2R)-2,3-Dihydroxy-2-methylpropyl]-18-hydroxy-23-methyl-15,21,24,26,29,32,35-heptaoxo-31-propan-2-yl-12-thia-10,16,22,25,27,30,33,36-octazapentacyclo[12.11.11.03,11.04,9.016,20]hexatriaconta-3(11),4,6,8-tetraen-34-yl]-2-hydroxyacetic acid	C[C@H]1C(=O)N[C@H]2CC3=C(NC4=CC=CC=C34)SC[C@@H](C(=O)N5C[C@H](C[C@H]5C(=O)N1)O)NC(=O)[C@H](NC(=O)[C@@H](NC(=O)[C@@H](NC2=O)C[C@](C)(CO)O)C(C)C)[C@@H](C(=O)O)O	0.131816	0.4	4116.57
Acetylleucyl-leucyl-norleucinal	CCCC[C@@H](C=O)NC(=O)[C@H](CC(C)C)NC(=O)[C@H](CC(C)C)NC(=O)C	0.422782	0.828447	1775.89
(2R)-2-(3-Chloro-N-(2-chloroacetyl)-4-methoxyanilino)-N-(2-phenylethyl)-2-thiophen-2-ylacetamide	COC1=C(C=C(C=C1)N([C@@H](C2=CC=CS2)C(=O)NCCC3=CC=CC=C3)C(=O)CCl)Cl	0.437513	0.805304	1959.43
N-(2-Cyclohexyloxy-4-nitrophenyl)methanesulfonamide	CS(=O)(=O)NC1=C(C=C(C=C1)[N+](=O)[O-])OC2CCCCC2	0.665167	0.968558	1295.62
N'-(5-Chloro-2-hydroxyphenyl)-N-octylpropanediamide	CCCCCCCCNC(=O)CC(=O)NC1=C(C=CC(=C1)Cl)O	0.343673	0.86493	1441.67
(5E)-5-[(3As,4S,5R,6aR)-5-hydroxy-4-[2-(1-hydroxycyclohexyl)ethynyl]-3,3a,4,5,6,6a-hexahydro-1H-pentalen-2-ylidene]pentanoic acid	C1CCC(CC1)(C#C[C@H]2[C@@H](C[C@@H]3[C@@H]2C/C(=C/CCCC(=O)O)/C3)O)O	0.414674	0.86493	1709.71
[1-[(2S)-2-Fluorohexyl]indol-3-yl]-naphthalen-1-ylmethanone	CCCC[C@@H](CN1C=C(C2=CC=CC=C21)C(=O)C3=CC=CC4=CC=CC=C43)F	0.336522	0.788227	2208.78
Pyrazolam	CC1=NN=C2N1C3=C(C=C(C=C3)Br)C(=NC2)C4=CC=CC=N4	0.674905	1	1411.08
N2-Cyclohexyl-N6-[4-(4-morpholinyl)phenyl]-1H-purine-2,6-diamine	C1CCC(CC1)NC2=NC3=C(C(=N2)NC4=CC=C(C=C4)N5CCOCC5)NC=N3	0.609007	0.835964	2049.6
(8As)-N-[(4-fluorophenyl)methyl]-3-oxo-1,1-diphenyl-5,6,8,8a-tetrahydro-[1,3]oxazolo[3,4-a]pyrazine-7-carboxamide	C1CN2[C@@H](CN1C(=O)NCC3=CC=C(C=C3)F)C(OC2=O)(C4=CC=CC=C4)C5=CC=CC=C5	0.657424	0.848968	2167.92
Fenofibrate	CC(C)OC(=O)C(C)(C)OC1=CC=C(C=C1)C(=O)C2=CC=C(C=C2)Cl	0.554062	0.999981	1500.57
PB-22 8-Hydroxyisoquinoline Isomer	CCCCCN1C=C(C2=CC=CC=C21)C(=O)OC3=CC=CC4=C3C=NC=C4	0.255965	0.967164	2082.47
27-Hydroxycholesterol	C[C@H](CCC[C@@H](C)[C@H]1CC[C@@H]2[C@@]1(CC[C@H]3[C@H]2CC=C4[C@@]3(CC[C@@H](C4)O)C)C)CO	0.507382	0.755835	2384.34
Pimozide	C1CN(CCC1N2C3=CC=CC=C3NC2=O)CCCC(C4=CC=C(C=C4)F)C5=CC=C(C=C5)F	0.374713	0.762775	2552.88
(25s)-26-Hydroxycholesterol	C[C@@H](CCC[C@@H](C)[C@H]1CC[C@@H]2[C@@]1(CC[C@H]3[C@H]2CC=C4[C@@]3(CC[C@@H](C4)O)C)C)CO	0.507382	0.755835	2384.34
Ezetimibe	C1=CC(=CC=C1[C@@H]2[C@H](C(=O)N2C3=CC=C(C=C3)F)CC[C@@H](C4=CC=C(C=C4)F)O)O	0.570214	0.863749	1945.92
Lopac-T-4425	C[C@@H]([C@@H]([C@@H]1CNC2=C(N1)C(=O)NC(=N2)N)O)O	0.362864	0.66304	957.694
2-{5-[3-(6-Benzoyl-1-propylnaphthalen-2-yloxy)propoxy]indol-1-YL}ethanoic acid	CCCC1=C(C=CC2=C1C=CC(=C2)C(=O)C3=CC=CC=C3)OCCCOC4=CC5=C(C=C4)N(C=C5)CC(=O)O	0.142572	0.614059	3054.43
Almorexant	CNC(=O)[C@@H](C1=CC=CC=C1)N2CCC3=CC(=C(C=C3[C@@H]2CCC4=CC=C(C=C4)C(F)(F)F)OC)OC	0.418213	0.736269	2534.39
Prostaglandin f1alpha	CCCCC[C@@H](/C=C/[C@H]1[C@@H](C[C@@H]([C@@H]1CCCCCCC(=O)O)O)O)O	0.299854	0.820098	1719.96
N-[(1-Pentyl-1H-indol-3-yl)carbonyl]-L-valine,methylester	CCCCCN1C=C(C2=CC=CC=C21)C(=O)N[C@@H](C(C)C)C(=O)OC	0.585788	0.976499	1782.36
(2S)-2-Amino-6-[2-[[(4S)-4-amino-4-carboxybutyl]amino]-1,5-dihydroimidazo[4,5-b]pyridin-4-yl]hexanoic acid	C1C=CC2=C(N1CCCC[C@@H](C(=O)O)N)N=C(N2)NCCC[C@@H](C(=O)O)N	0.281254	0.596357	1714.04
Coumestrol	C1=CC2=C(C=C1O)OC3=C2C(=O)OC4=C3C=CC(=C4)O	0.478597	0.921306	1373.35
5-Fluoro-AMP	CC(C)[C@@H](C(=O)OC)NC(=O)C1=NN(C2=CC=CC=C21)CCCCCF	0.54877	0.976172	1741.63
Ctpb	CCCCCCCCCCCCCCCC1=C(C(=CC=C1)OCC)C(=O)NC2=CC(=C(C=C2)Cl)C(F)(F)F	0.186352	0.576869	2776.64
JWH 122 8-methylnaphthyl isomer	CCCCCN1C=C(C2=CC=CC=C21)C(=O)C3=CC=CC4=CC=CC(=C43)C	0.284784	0.796	2197.21
Eliglustat	CCCCCCCC(=O)N[C@H](CN1CCCC1)[C@@H](C2=CC3=C(C=C2)OCCO3)O	0.55309	0.873119	2054.51
Siramesine	C1CN(CCC12C3=CC=CC=C3CO2)CCCCC4=CN(C5=CC=CC=C54)C6=CC=C(C=C6)F	0.304938	0.617734	2701.53
Doxorubicin	C[C@H]1[C@H]([C@H](C[C@@H](O1)O[C@H]2C[C@@](CC3=C2C(=C4C(=C3O)C(=O)C5=C(C4=O)C(=CC=C5)OC)O)(C(=O)CO)O)N)O	0.235263	0.404194	2503.99
N-[(2S)-1-Amino-3,3-dimethyl-1-oxobutan-2-yl]-1-(5-hydroxypentyl)indole-3-carboxamide	CC(C)(C)[C@@H](C(=O)N)NC(=O)C1=CN(C2=CC=CC=C21)CCCCCO	0.631505	0.859017	1820.08
(R)-2-[Benzyl[(4-methoxyphenyl)sulfonyl]amino]-4-methylpentanehydroximic acid	CC(C)C[C@H](C(=O)NO)N(CC1=CC=CC=C1)S(=O)(=O)C2=CC=C(C=C2)OC	0.493117	0.865534	1871.7
Actinonin	CCCCC[C@H](CC(=O)NO)C(=O)N[C@@H](C(C)C)C(=O)N1CCC[C@H]1CO	0.242064	0.735259	1741.48
2-(3-Hydroxy-6-oxoxanthen-9-yl)-5-[[(Z)-[1-oxo-1-[[(3R)-2-oxooxolan-3-yl]amino]dodecan-3-ylidene]amino]carbamothioylamino]benzoic acid	CCCCCCCCC/C(=N/NC(=S)NC1=CC(=C(C=C1)C2=C3C=CC(=O)C=C3OC4=C2C=CC(=C4)O)C(=O)O)/CC(=O)N[C@@H]5CCOC5=O	0.022602	0.269104	3755.79
4-(4-Chlorophenyl)-N-(cyclopentylideneamino)-N-prop-2-ynyl-1,3-thiazol-2-amine	C#CCN(C1=NC(=CS1)C2=CC=C(C=C2)Cl)N=C3CCCC3	0.593228	0.969477	1349.03
(2R)-5-[(2S)-6-Hydroxy-2,5,7,8-tetramethyl-3,4-dihydrochromen-2-yl]-2-methylpentanoic acid	CC1=C(C2=C(CC[C@](O2)(C)CCC[C@@H](C)C(=O)O)C(=C1O)C)C	0.848944	0.921306	1541.61
1-(2,4-Dibromophenyl)-3-((4S,5S)-2,2-dimethyl-4-phenyl-(1,3)dioxan-5-yl)urea	CC1(OC[C@@H]([C@@H](O1)C2=CC=CC=C2)NC(=O)NC3=C(C=C(C=C3)Br)Br)C	0.628171	0.739751	1546.36
CeMMEC13	CN1C2=CC=CC=C2C(=CC1=O)C(=O)NC3=CC4=C(C=C3)OCCO4	0.780774	0.976499	1732.08
2-Bromo-N-(3-butyramidophenyl)benzamide	CCCC(=O)NC1=CC(=CC=C1)NC(=O)C2=CC=CC=C2Br	0.827271	0.921263	1347.67
CID 11764292	C[C@@H]1[C@H](CC[C@@H](O1)O[C@@H]2C[C@@H](C3=C([C@H]2O)OC4=C5C6=C(C7=C(C8=C(C[C@@]9(N(C8=O)CCO9)C)C=C7C[C@H]6OCO5)O)C(=C4C3=O)O)O)O[C@H]1C[C@H]([C@@H]([C@H](O1)C)O)OC	0.249862	0.408795	4300.57
(2S)-1-Phenyl-2-pyrrolidin-1-yloctan-1-one	CCCCCC[C@@H](C(=O)C1=CC=CC=C1)N2CCCC2	0.519575	0.923186	1401.09
Toltrazuril	CC1=C(C=CC(=C1)N2C(=O)NC(=O)N(C2=O)C)OC3=CC=C(C=C3)SC(F)(F)F	0.649967	0.886941	1817.95
Leucomycin A1	C[C@@H]1C/C=C/C=C/[C@@H]([C@@H](C[C@@H]([C@@H]([C@H]([C@@H](CC(=O)O1)O)OC)O[C@H]2[C@@H]([C@H]([C@@H]([C@H](O2)C)O[C@H]3C[C@@]([C@H]([C@@H](O3)C)OC(=O)CC(C)C)(C)O)N(C)C)O)CC=O)C)O	0.175832	0.427308	4016.39
Gossypol	CC1=CC2=C(C(=C(C(=C2C(C)C)O)O)C=O)C(=C1C3=C(C4=C(C=C3C)C(=C(C(=C4C=O)O)O)C(C)C)O)O	0.131236	0.303669	2514.21
N-[(2R)-2,3-Dihydroxypropoxy]-3,4-difluoro-2-[(2-fluoro-4-iodophenyl)amino]benzamide	C1=CC(=C(C=C1I)F)NC2=C(C=CC(=C2F)F)C(=O)NOC[C@@H](CO)O	0.35996	0.652132	1330.15
(1R,5E,7R,9S,11E,13S,14S,16R,17S,18S,19S)-19-Benzyl-7-hydroxy-7,9,16,17-tetramethyl-2,4,15-trioxa-20-azatetracyclo[11.8.0.01,18.014,16]henicosa-5,11-diene-3,8,21-trione	C[C@H]1C/C=C/[C@H]2[C@H]3[C@](O3)([C@H]([C@@H]4[C@@]2(C(=O)N[C@H]4CC5=CC=CC=C5)OC(=O)O/C=C/[C@@](C1=O)(C)O)C)C	0.368132	0.680322	2506.81
Unii-7R7KG9R7ZB	CN1CCCC[C@@H](C1)N2C=C(C3=CC=CC=C32)C(=O)C4=CC=CC5=CC=CC=C54	0.42584	0.897202	2367.82
(8R,9R,10S,11S,13S,14S,16R,17R)-9-Fluoro-11,17-dihydroxy-17-(2-hydroxyacetyl)-10,13,16-trimethyl-6,7,8,11,12,14,15,16-octahydrocyclopenta[a]phenanthren-3-one	C[C@@H]1C[C@H]2[C@H]3CCC4=CC(=O)C=C[C@@]4([C@]3([C@H](C[C@@]2([C@]1(C(=O)CO)O)C)O)F)C	0.667213	0.835117	1886.05
Heptyl-UR-144	CCCCCCCN1C=C(C2=CC=CC=C21)C(=O)C3C(C3(C)C)(C)C	0.398486	0.800627	1945.45
(2R)-5-[(2R)-6-Hydroxy-2,5,7,8-tetramethyl-3,4-dihydrochromen-2-yl]-2-methylpentanoic acid	CC1=C(C2=C(CC[C@@](O2)(C)CCC[C@@H](C)C(=O)O)C(=C1O)C)C	0.848944	0.921306	1541.61
6-Methoxy-1-naphthalen-1-yl-9H-pyrido[3,4-b]indole	COC1=CC2=C(C=C1)NC3=C2C=CN=C3C4=CC=CC5=CC=CC=C54	0.462439	0.947818	1987.71
1-(2-Methylbenzo[d]oxazol-6-yl)-3-(1,5-naphthyridin-4-yl)urea	CC1=NC2=C(O1)C=C(C=C2)NC(=O)NC3=C4C(=NC=C3)C=CC=N4	0.587087	0.920348	1620.2
Pregnenolone carbonitrile	CC(=O)[C@H]1[C@@H](C[C@@H]2[C@@]1(CC[C@H]3[C@H]2CC=C4[C@@]3(CC[C@@H](C4)O)C)C)C#N	0.724744	0.976499	1853.21
N-Benzyl-1-(5-fluoropentyl)-1H-indole-3-carboxamide	C1=CC=C(C=C1)CNC(=O)C2=CN(C3=CC=CC=C32)CCCCCF	0.592993	0.967785	1815.16
VX-702	C1=CC(=C(C(=C1)F)N(C2=NC(=C(C=C2)C(=O)N)C3=C(C=C(C=C3)F)F)C(=O)N)F	0.649452	0.857399	1584.9
Trelagliptin	CN1C(=O)C=C(N(C1=O)CC2=C(C=CC(=C2)F)C#N)N3CCC[C@H](C3)N	0.864411	0.971052	1793.52
Bms-265246	CCCCOC1=C(C=NC2=NNC=C12)C(=O)C3=C(C=C(C=C3F)C)F	0.542406	0.976499	1584.88
Quinolin-8-yl 1-[(3S)-3-fluoropentyl]indole-3-carboxylate	CC[C@@H](CCN1C=C(C2=CC=CC=C21)C(=O)OC3=CC=CC4=C3N=CC=C4)F	0.327429	0.964859	2080.09
2-(3-Hydroxy-6-oxoxanthen-9-yl)-5-[[(Z)-[1-oxo-1-[[(3S)-2-oxooxolan-3-yl]amino]dodecan-3-ylidene]amino]carbamothioylamino]benzoic acid	CCCCCCCCC/C(=N/NC(=S)NC1=CC(=C(C=C1)C2=C3C=CC(=O)C=C3OC4=C2C=CC(=C4)O)C(=O)O)/CC(=O)N[C@H]5CCOC5=O	0.022602	0.269104	3755.79
Isobutyl 1-pentyl-1h-indazole-3-carboxylate	CCCCCN1C2=CC=CC=C2C(=N1)C(=O)OCC(C)C	0.570262	1	1480.48
Isoquinolin-4-yl1-pentyl-1H-indole-3-carboxylate	CCCCCN1C=C(C2=CC=CC=C21)C(=O)OC3=CN=CC4=CC=CC=C43	0.332822	0.967164	2082.47
IRAK-1/4 Inhibitor	C1COCCN1CCN2C3=CC=CC=C3N=C2NC(=O)C4=CC(=CC=C4)[N+](=O)[O-]	0.508232	0.927814	1955.24
(2-Methyl-1-propylindol-3-yl)-naphthalen-1-ylmethanone	CCCN1C(=C(C2=CC=CC=C21)C(=O)C3=CC=CC4=CC=CC=C43)C	0.437797	0.88505	1990.76
Fenretinide	CC1=C(C(CCC1)(C)C)/C=C/C(=C/C=C/C(=C/C(=O)NC2=CC=C(C=C2)O)/C)/C	0.315948	0.730787	2122.96
Uprosertib	CN1C(=C(C=N1)Cl)C2=C(OC(=C2)C(=O)N[C@@H](CC3=CC(=C(C=C3)F)F)CN)Cl	0.627668	0.824045	1633.85
Gnf-5	C1=CC(=CC(=C1)C(=O)NCCO)C2=CC(=NC=N2)NC3=CC=C(C=C3)OC(F)(F)F	0.543547	0.785063	1750.3
Methyl (2R)-2-[[4-[[(2R)-2-amino-3-sulfanylpropyl]amino]-2-naphthalen-1-ylbenzoyl]amino]-4-methylpentanoate	CC(C)C[C@H](C(=O)OC)NC(=O)C1=C(C=C(C=C1)NC[C@H](CS)N)C2=CC=CC3=CC=CC=C32	0.253909	0.653137	2484.93
Cytochalasin e	C[C@H]1C/C=C/[C@H]2[C@H]3[C@](O3)([C@H]([C@@H]4[C@]2(C(=O)N[C@H]4CC5=CC=CC=C5)OC(=O)O/C=C/[C@@](C1=O)(C)O)C)C	0.368132	0.680322	2506.81
(2S)-5-[(2R)-6-Hydroxy-2,5,7,8-tetramethyl-3,4-dihydrochromen-2-yl]-2-methylpentanoic acid	CC1=C(C2=C(CC[C@@](O2)(C)CCC[C@H](C)C(=O)O)C(=C1O)C)C	0.848944	0.921306	1541.61
(2-Methoxyphenyl)(1-pentyl-1H-indole-3-yl)methanone	CCCCCN1C=C(C2=CC=CC=C21)C(=O)C3=CC=CC=C3OC	0.449146	0.981162	1797.95
Propyl 4-(1-hexyl-4-hydroxy-2-oxo-1,2-dihydroquinoline-3-carboxamido)benzoate	CCCCCCN1C2=CC=CC=C2C(=C(C1=O)C(=O)NC3=CC=C(C=C3)C(=O)OCCC)O	0.330539	0.777875	2423.77
Mitomycin	CC1=C(C(=O)C2=C(C1=O)N3C[C@H]4[C@@H]([C@@]3([C@@H]2COC(=O)N)OC)N4)N	0.41067	0.698055	1375.36
[(2S)-1-Methoxy-3,3-dimethyl-1-oxobutan-2-yl] 1-(cyclohexylmethyl)indazole-3-carboxylate	CC(C)(C)[C@@H](C(=O)OC)OC(=O)C1=NN(C2=CC=CC=C21)CC3CCCCC3	0.714154	0.981425	1952.65
Dexamethasone	C[C@@H]1C[C@H]2[C@@H]3CCC4=CC(=O)C=C[C@@]4([C@]3([C@H](C[C@@]2([C@]1(C(=O)CO)O)C)O)F)C	0.667213	0.835117	1886.05
(5S)-1,3-Bis(4-bromophenyl)-5-phenylimidazolidine-2,4-dione	C1=CC=C(C=C1)[C@H]2C(=O)N(C(=O)N2C3=CC=C(C=C3)Br)C4=CC=C(C=C4)Br	0.431378	0.752179	1648.6
Fumagillin	CC(=CC[C@@H]1[C@@](O1)(C)[C@H]2[C@@H]([C@@H](CC[C@]23CO3)OC(=O)/C=C/C=C/C=C/C=C/C(=O)O)OC)C	0.174199	0.821604	2246.6
Panobinostat	CC1=C(C2=CC=CC=C2N1)CCNCC3=CC=C(C=C3)/C=C/C(=O)NO	0.228672	0.827067	1868.51
Florfenicol	CS(=O)(=O)C1=CC=C(C=C1)[C@H]([C@@H](CF)NC(=O)C(Cl)Cl)O	0.753022	0.921306	1111.01
[(R)-Cyano-(6-methoxynaphthalen-2-yl)methyl] [(2R,3R)-3-phenyloxiran-2-yl]methyl carbonate	COC1=CC2=C(C=C1)C=C(C=C2)[C@H](C#N)OC(=O)OC[C@@H]3[C@H](O3)C4=CC=CC=C4	0.448713	0.977365	1932.74
3-(Cyclopropylmethyl)-7-(4-phenylpiperidin-1-yl)-8-(trifluoromethyl)-[1,2,4]triazolo[4,3-a]pyridine	C1CC1CC2=NN=C3N2C=CC(=C3C(F)(F)F)N4CCC(CC4)C5=CC=CC=C5	0.612081	0.948128	1985.79
7-Methylguanosine	CN1C=[N+](C2=C1C(=O)NC(=N2)N)[C@H]3[C@@H]([C@@H]([C@H](O3)CO)O)O	0.365087	0.634963	1299.25
(2S)-5-[(2S)-6-Hydroxy-2,5,7,8-tetramethyl-3,4-dihydrochromen-2-yl]-2-methylpentanoic acid	CC1=C(C2=C(CC[C@](O2)(C)CCC[C@H](C)C(=O)O)C(=C1O)C)C	0.848944	0.921306	1541.61
Epirubicin	C[C@H]1[C@@H]([C@H](C[C@@H](O1)O[C@H]2C[C@@](CC3=C2C(=C4C(=C3O)C(=O)C5=C(C4=O)C(=CC=C5)OC)O)(C(=O)CO)O)N)O	0.235263	0.404194	2503.99
1,6-Bis(cyclohexyloximinocarbonyl)hexane	C1CCC(=NOC(=O)NCCCCCCNC(=O)ON=C2CCCCC2)CC1	0.337783	0.876922	1673.47
Pravadoline	CC1=C(C2=CC=CC=C2N1CCN3CCOCC3)C(=O)C4=CC=C(C=C4)OC	0.615812	0.990743	2023.53
N-[[1-(4-Carboxybutyl)-1H-indazol-3-yl]carbonyl]-L-valine,1-methylester	CC(C)[C@@H](C(=O)OC)NC(=O)C1=NN(C2=CC=CC=C21)CCCCC(=O)O	0.513533	0.873089	1763.28
8-Methyl-6-nonenoic acid	CC(C)/C=C/CCCCC(=O)O	0.49132	0.974685	682.736
Methyl 2-[(1R,2S,4R,6S,9R,10S,11R,15R,18S)-6-(furan-3-yl)-7,9,11,15-tetramethyl-12,16-dioxo-3,17-dioxapentacyclo[9.6.1.02,9.04,8.015,18]octadeca-7,13-dien-10-yl]acetate	CC1=C2[C@@H](C[C@@H]1C3=COC=C3)O[C@H]4[C@@]2([C@@H]([C@@]5([C@@H]6[C@H]4OC(=O)[C@@]6(C=CC5=O)C)C)CC(=O)OC)C	0.494911	0.84089	2403.16
(2S)-2-[Benzyl-(4-methoxyphenyl)sulfonylamino]-N-hydroxy-4-methylpentanamide	CC(C)C[C@@H](C(=O)NO)N(CC1=CC=CC=C1)S(=O)(=O)C2=CC=C(C=C2)OC	0.493117	0.865534	1871.7
1-(3,5-Di-tert-butyl-4-hydroxyphenyl)-2-(2-(3-hydroxypropylamino)-5,6-dimethyl-1H-benzo[d]imidazol-1-yl)ethanone	CC1=CC2=C(C=C1C)N(C(=N2)NCCCO)CC(=O)C3=CC(=C(C(=C3)C(C)(C)C)O)C(C)(C)C	0.310842	0.671287	2482.22
2-Methyl-1-(2-methyl-5-nitrophenylsulfonyl)-1H-benzo[d]imidazole	CC1=C(C=C(C=C1)[N+](=O)[O-])S(=O)(=O)N2C(=NC3=CC=CC=C32)C	0.543027	0.997131	1575.19
6-(3-Aminobenzyl)-4-Methyl-2-Methylsulfinyl-4,6-Dihydro-5h-Thieno[2',3':4,5]pyrrolo[2,3-D]pyridazin-5-One	CN1C2=C(C3=C1C(=O)N(N=C3)CC4=CC(=CC=C4)N)SC(=C2)[S@](=O)C	0.559591	0.972223	1835.22
Pranlukast	C1=CC=C(C=C1)CCCCOC2=CC=C(C=C2)C(=O)NC3=CC=CC4=C3OC(=CC4=O)C5=NNN=N5	0.294351	0.65625	2624.61
Glycodeoxycholic acid	C[C@H](CCC(=O)NCC(=O)O)[C@H]1CC[C@@H]2[C@@]1([C@H](C[C@H]3[C@H]2CC[C@H]4[C@@]3(CC[C@H](C4)O)C)O)C	0.495706	0.66338	2397.59
8-Ethenyl-1-hydroxy-10,12-dimethoxy-4-[(2S,3R,4S,5S,6R)-3,4,5-trihydroxy-4,6-dimethyloxan-2-yl]naphtho[1,2-c]isochromen-6-one	C[C@@H]1[C@@H]([C@]([C@@H]([C@@H](O1)C2=C3C(=C(C=C2)O)C(=CC4=C3OC(=O)C5=C4C(=CC(=C5)C=C)OC)OC)O)(C)O)O	0.241262	0.489617	2724.19
[truncated: 6,113 more rows]
